# Supplementary material for: Inhibition of BMPR2 ubiquitination-dependent degradation suppresses bladder cancer cell growth via downregulating Smurf1 expression with 8003-1841
Source: Research Square preprint supplement (doi:10.21203/rs.3.rs-5313133/v1), 2024-10-28
Supplement: Supplementary file 1 [file 39c9538f30b3e0a8a8167375.xlsx]

## Sheet: Sheet1
Title	FRED Chemgauss4 score	CG3:Steric	CG3:Clash	CG3:ProDesolv	CG3:LigDesolv	CG3:LigDesolvHB	CG4:HB	B_rotN	CLNUMBER	Collection	H_acceptor	H_donor	IDNUMBER	N_O	Name	PSA	Smile	available	logD	logP	logSw
omega_22638	-11.6265	-12.0442	0.671208	3.98257	4.30299	-4.87749	-3.66155	5	CV0299	DC	5	2	C720-0595	6	N-(4-fluorobenzyl)-2-hydroxy-8-methyl-4-oxo-4H-pyrido[1,2-a]pyrimidine-3-carboxamide	82	Fc1ccc(CNC(=O)C=2C(=O)N3C(=NC=2O)C=C(C)C=C3)cc1	47	0.53	1.47	-1.49
omega_22691	-11.4284	-12.5408	0.635198	4.40703	4.15175	-4.45617	-3.62541	5	CV0299	DC	4	2	C720-0661	6	2-hydroxy-4-oxo-N-(1-phenylethyl)-4H-pyrido[1,2-a]pyrimidine-3-carboxamide	82	O=C(NC(C)c1ccccc1)C=1C(=O)N2C(=NC=1O)C=CC=C2	22	0.38	1.2	-2.84
omega_22642	-11.3744	-12.1106	0.68215	4.24599	4.31913	-4.85166	-3.65936	4	CV0299	DC	6	2	C720-0600	6	N-(4-chlorobenzyl)-2-hydroxy-8-methyl-4-oxo-4H-pyrido[1,2-a]pyrimidine-3-carboxamide	82	Clc1ccc(CNC(=O)C=2C(=O)N3C(=NC=2O)C=C(C)C=C3)cc1	1	1.42	3.71	-4.23
omega_22637	-11.343	-11.8913	0.636165	4.01342	4.21462	-4.67103	-3.64483	5	CV0299	DC	4	2	C720-0593	6	N-benzyl-2-hydroxy-8-methyl-4-oxo-4H-pyrido[1,2-a]pyrimidine-3-carboxamide	82	O=C(NCc1ccccc1)C=1C(=O)N2C(=NC=1O)C=C(C)C=C2	9	0.9	1.27	-1.79
omega_22687	-11.232	-12.1541	0.681322	4.30886	4.29678	-4.62649	-3.73842	5	CV0299	DC	5	2	C720-0657	6	N-(4-fluorobenzyl)-2-hydroxy-4-oxo-4H-pyrido[1,2-a]pyrimidine-3-carboxamide	82	Fc1ccc(CNC(=O)C=2C(=O)N3C(=NC=2O)C=CC=C3)cc1	2	0.42	1.03	-2.28
omega_22692	-10.9484	-11.7136	0.700857	4.15569	4.2824	-4.79352	-3.58028	5	CV0299	DC	5	2	C720-0662	6	N-(4-chlorobenzyl)-2-hydroxy-4-oxo-4H-pyrido[1,2-a]pyrimidine-3-carboxamide	82	Clc1ccc(CNC(=O)C=2C(=O)N3C(=NC=2O)C=CC=C3)cc1	21	1.34	1.48	-3.97
omega_453530	-10.8131	-9.26434	0.499872	4.16207	5.37305	-5.62577	-5.95799	5		DC	6	4	4112-1233	7	2,4-dihydroxybenzaldehyde (5-chloro-6-oxo-1,6-dihydropyridazin-4-yl)hydrazone	106.31	ClC=1C(=O)NN=CC=1NN=Cc1c(O)cc(O)cc1	27	0.44	0.74	-1.35
omega_575935	-10.796	-9.60513	0.319736	2.84661	6.42134	-6.46639	-4.31217	5		DC	8	4	8011-6589	8	N-{2-[(1H-pyrazol-5-ylcarbonyl)amino]ethyl}-1H-pyrazole-5-carboxamide	115.56	O=C(NCCNC(=O)c1[nH]ncc1)c1[nH]ncc1	32	-0.51	-0.51	-2.18
omega_1500390	-10.7501	-14.1171	0.354118	3.96452	4.92094	-3.35716	-2.51537	7	CM0615	NC	5	3	P574-4672	8	2-[2-amino-4-(methoxymethyl)-6-oxo-1(6H)-pyrimidinyl]-N~1~-(2-methoxyphenyl)acetamide	106.25	O=C(Nc1c(OC)cccc1)CN1C(N)=NC(COC)=CC1=O	219	-0.087	0.321	-1.73
omega_611716	-10.7188	-9.28682	0.226069	3.14376	4.98897	-5.25471	-4.53612	3		DC	6	2	8018-5119	6	N-(2-methoxybenzyl)-N-(2H-1,2,3,4-tetraazol-5-yl)amine	75.72	O(C)c1c(CNc2n[nH]nn2)cccc1	1	-0.52	1.05	-2.35
omega_453535	-10.7113	-9.86099	0.524243	4.88005	4.3555	-5.63438	-4.97572	3		DC	4	2	4112-1255	5	4-methylbenzaldehyde (5-chloro-6-oxo-1,6-dihydropyridazin-4-yl)hydrazone	65.85	ClC=1C(=O)NN=CC=1NN=Cc1ccc(C)cc1	33	2.8	1.76	-2.76
omega_6903	-10.6679	-11.4402	0.318111	4.80068	4.22507	-4.62764	-3.94398	4		DC	6	3	C614-5994	6	4-(3,4,5-trimethoxyphenyl)-1H-pyrazol-3-amine	82.39	O(C)c1c(OC)cc(-c2c(N)n[nH]c2)cc1OC	2	-0.44	-0.44	-2.49
omega_1500386	-10.6599	-13.6488	0.380646	4.86501	4.24297	-3.77593	-2.72376	6	CM0615	NC	4	3	P574-4668	7	2-[2-amino-4-(methoxymethyl)-6-oxo-1(6H)-pyrimidinyl]-N~1~-(2,3-dimethylphenyl)acetamide	97.02	O=C(Nc1c(C)c(C)ccc1)CN1C(N)=NC(COC)=CC1=O	172	1.253	1.31	0.77
omega_22641	-10.6034	-11.3429	0.707538	4.28985	4.10905	-4.46648	-3.9005	5	CV0299	DC	4	2	C720-0599	6	2-hydroxy-8-methyl-4-oxo-N-(1-phenylethyl)-4H-pyrido[1,2-a]pyrimidine-3-carboxamide	82	O=C(NC(C)c1ccccc1)C=1C(=O)N2C(=NC=1O)C=C(C)C=C2	15	-0.25	1.64	-2.82
omega_1500129	-10.6033	-13.1606	0.429057	4.82221	2.98472	-3.22503	-2.45359	2	CM0615	NC	6	2	P574-0994	6	2-amino-3-[2-(2,3-dihydro-1H-indol-1-yl)-2-oxoethyl]-6-methyl-4(3H)-pyrimidinone	79	O=C(CN1C(N)=NC(C)=CC1=O)N1c2c(cccc2)CC1	47	1.16	1.16	-3.28
omega_453527	-10.5864	-9.8527	0.659927	5.003	4.36792	-5.90851	-4.85607	4		DC	4	2	4112-1225	6	4-(dimethylamino)benzaldehyde (5-chloro-6-oxo-1,6-dihydropyridazin-4-yl)hydrazone	69.09	ClC=1C(=O)NN=CC=1NN=Cc1ccc(N(C)C)cc1	20	2.06	1.44	-3.3
omega_1215784	-10.5408	-13.0452	0.563528	5.04808	6.22242	-4.82342	-4.50617	10	CL1755	NC	4	3	C190-0060	8	N-[2-(acetylamino)ethyl]-2,4-dioxo-3-pentyl-1,2,3,4-tetrahydroquinazoline-7-carboxamide	107.61	O=C(NCCNC(=O)c1cc2NC(=O)N(CCCCC)C(=O)c2cc1)C	22	1.54	1.48	-1.08
omega_945148	-10.5224	-10.9569	0.187654	4.00734	3.93437	-4.03369	-3.66119	4		DC	5	2	8018-5171	5	N-(4-chlorobenzyl)-N-[2-(1H-1,2,3,4-tetraazol-5-yl)phenyl]amine	66.49	Clc1ccc(CNc2c(-c3[nH]nnn3)cccc2)cc1	31	0.74	2.52	-4.01
omega_22599	-10.5061	-11.5195	0.771369	4.43655	4.25265	-4.84824	-3.5989	5	CV0299	DC	5	2	C720-0540	6	N-(4-chlorobenzyl)-2-hydroxy-9-methyl-4-oxo-4H-pyrido[1,2-a]pyrimidine-3-carboxamide	82	Clc1ccc(CNC(=O)C=2C(=O)N3C(C(C)=CC=C3)=NC=2O)cc1	89	1.33	2.04	-3.55
omega_22593	-10.4884	-11.6168	0.736938	4.36726	4.29605	-4.81249	-3.45935	5	CV0299	DC	5	2	C720-0534	6	N-(4-fluorobenzyl)-2-hydroxy-9-methyl-4-oxo-4H-pyrido[1,2-a]pyrimidine-3-carboxamide	82	Fc1ccc(CNC(=O)C=2C(=O)N3C(C(C)=CC=C3)=NC=2O)cc1	46	0.63	1.58	-1.49
omega_747134	-10.4601	-12.5863	0.6793	6.38348	6.82731	-6.88918	-4.87472	8	CL4907	DC	6	3	K284-7837	9	N-[2-(acetylamino)ethyl]-2-anilino-5-oxo-5H-[1,3,4]thiadiazolo[2,3-b]quinazoline-8-carboxamide	140.56	O=C(NCCNC(=O)c1cc2N=C3SC(Nc4ccccc4)=NN3C(=O)c2cc1)C	131	1.22	2.24	-3.31
omega_6211	-10.4586	-12.7124	0.341906	4.76004	5.04741	-4.33655	-3.55904	3	CL1273	DC	6	2	C612-0840	6	3-{[(2-chloro-4-methylphenyl)amino]carbonyl}pyrazine-2-carboxylic acid	92.18	Clc1c(NC(=O)c2c(C(=O)O)nccn2)ccc(C)c1	23	-1.3	1.93	1.22
omega_942105	-10.4544	-10.2375	0.290295	3.24018	5.08208	-5.04566	-3.78376	4	CL5633	DC	6	1	8017-6114	6	2-(difluoromethoxy)-5-(2H-1,2,3,4-tetraazol-5-yl)phenyl methyl ether	72.92	FC(F)Oc1c(OC)cc(-c2n[nH]nn2)cc1	31	-0.21	1.77	-3.1
omega_284940	-10.4512	-12.4193	0.618362	4.22986	4.13682	-4.509	-2.50791	5	CL6481	DC	6	1	G205-0890	7	N-(4-fluorobenzyl)-5-oxo-2-pyrrolidin-1-yl-5H-[1,3,4]thiadiazolo[3,2-a]pyrimidine-6-carboxamide	102.67	Fc1ccc(CNC(=O)C=2C(=O)N3N=C(N4CCCC4)SC3=NC=2)cc1	114	2.36	2.64	-5.61
omega_1500380	-10.4357	-13.5421	0.357	4.25345	4.35414	-3.22641	-2.63177	6	CM0615	NC	4	3	P574-4660	7	2-[2-amino-4-(methoxymethyl)-6-oxo-1(6H)-pyrimidinyl]-N~1~-(2-methylphenyl)acetamide	97.02	O=C(Nc1c(C)cccc1)CN1C(N)=NC(COC)=CC1=O	144	0.406	0.823	1.76
omega_62068	-10.4056	-11.9241	0.39774	4.40867	4.71814	-4.25336	-3.75273	6	CL5013	DC	5	2	D205-0319	7	N-(6-benzyl-7-hydroxy-5-methyl[1,2,4]triazolo[1,5-a]pyrimidin-2-yl)-2-methylpropanamide	92.41	O=C(Nc1nn2C(O)=C(Cc3ccccc3)C(C)=Nc2n1)C(C)C	172	1	3.54	-1.5
omega_918359	-10.3903	-10.9059	0.66887	4.45005	5.99808	-6.22166	-4.3798	4		DC	6	3	Y043-5498	6	N-(5-phenethyl-1H-1,2,4-triazol-3-yl)-1H-indole-2-carboxamide	86.46	O=C(Nc1nc(CCc2ccccc2)[nH]n1)c1[nH]c2c(c1)cccc2	30	4.39	4.39	-5.48
omega_22650	-10.3872	-11.2394	0.646343	4.26084	4.20728	-4.5833	-3.67892	7	CV0299	DC	4	2	C720-0609	6	2-hydroxy-8-methyl-4-oxo-N-(3-phenylpropyl)-4H-pyrido[1,2-a]pyrimidine-3-carboxamide	82	O=C(NCCCc1ccccc1)C=1C(=O)N2C(=NC=1O)C=C(C)C=C2	44	1	2.04	-1.54
omega_22651	-10.3859	-12.5068	0.654434	5.00375	4.14312	-4.42445	-3.25599	7	CV0299	DC	4	2	C720-0610	6	2-hydroxy-8-methyl-N-(1-methyl-3-phenylpropyl)-4-oxo-4H-pyrido[1,2-a]pyrimidine-3-carboxamide	82	O=C(NC(CCc1ccccc1)C)C=1C(=O)N2C(=NC=1O)C=C(C)C=C2	50	0.48	2.42	-0.88
omega_22591	-10.3845	-11.1351	0.706852	4.19553	4.30455	-4.75781	-3.69844	5	CV0299	DC	4	2	C720-0532	6	N-benzyl-2-hydroxy-9-methyl-4-oxo-4H-pyrido[1,2-a]pyrimidine-3-carboxamide	82	O=C(NCc1ccccc1)C=1C(=O)N2C(C(C)=CC=C2)=NC=1O	83	0.98	1.37	-1.8
omega_460534	-10.3779	-9.44843	0.511974	4.65858	4.3647	-5.70396	-4.76075	3		DC	5	2	4300-0741	5	4-fluorobenzaldehyde (5-chloro-6-oxo-1,6-dihydropyridazin-4-yl)hydrazone	65.85	ClC=1C(=O)NN=CC=1NN=Cc1ccc(F)cc1	18	2.6	1.48	-2.14
omega_914607	-10.3183	-14.9145	0.721182	6.23991	3.57762	-2.68114	-3.26137	6		DC	6	2	Y042-3520	6	2-allyl-N-[2-(1H-indol-3-yl)ethyl]-1,3-dioxo-5-isoindolinecarboxamide	82.27	O=C(NCCc1c2c([nH]c1)cccc2)c1cc2C(=O)N(CC=C)C(=O)c2cc1	30	2.58	2.58	-4.47
omega_87069	-10.2853	-14.4308	0.476653	5.96414	4.73415	-4.04777	-2.98164	6	CL7372	DC	5	2	D351-0108	7	2-(4-chlorophenyl)-5-{[(2-ethoxyphenyl)amino]methyl}[1,2,4]triazolo[1,5-a]pyrimidin-7(4H)-one	81.07	Clc1ccc(-c2nn3C(=O)C=C(CNc4c(OCC)cccc4)Nc3n2)cc1	161	1.87	3.34	-1.78
omega_285045	-10.274	-11.8533	0.51733	4.85346	4.60276	-5.31226	-3.08198	6	CL6481	DC	5	1	G205-1978	7	N-cycloheptyl-2-(diethylamino)-5-oxo-5H-[1,3,4]thiadiazolo[3,2-a]pyrimidine-6-carboxamide	102.67	O=C(NC1CCCCCC1)C=1C(=O)N2N=C(N(CC)CC)SC2=NC=1	7	2.9	3.41	-3.2
omega_6273	-10.2739	-12.2348	0.32426	4.61754	4.55433	-3.22577	-4.30939	3		DC	4	2	C612-1072	5	N-(2,5-dimethylphenyl)-3-(hydroxymethyl)pyrazine-2-carboxamide	75.11	O=C(Nc1c(C)ccc(C)c1)c1c(CO)nccn1	5	0.43	1.33	0.78
omega_252124	-10.2718	-12.342	0.689484	4.3605	3.22811	-4.03277	-2.17505	3	CL7852	DC	5	1	F692-0324	5	N-(4-fluorobenzyl)-7,8-dimethyl-4-oxo-4H-[1,3]thiazino[3,2-a][1,3]benzimidazole-2-carboxamide	89.29	Fc1ccc(CNC(=O)C=2Sc3n(C(=O)C=2)c2c(n3)cc(C)c(C)c2)cc1	2	3.92	3.92	-5.28
omega_611754	-10.2708	-10.5744	0.200699	3.86193	4.01799	-3.92387	-3.85309	4		DC	6	2	8018-5172	6	N-(4-pyridylmethyl)-N-[2-(1H-1,2,3,4-tetraazol-5-yl)phenyl]amine	79.38	N(Cc1ccncc1)c1c(-c2[nH]nnn2)cccc1	40	1.25611	0.6	-1.27878
omega_90449	-10.2603	-11.6001	0.610137	4.02823	3.80105	-4.75797	-2.34164	4	CL2813A	DC	4	1	D358-0025	5	5-oxo-N-(1-phenylethyl)-5H-[1,3]thiazolo[3,2-a]pyrimidine-6-carboxamide	87.07	O=C(NC(C)c1ccccc1)C=1C(=O)N2C(SC=C2)=NC=1	178	1.57	1.01	-4.3
omega_519902	-10.2521	-12.0891	0.414287	4.45818	2.85597	-3.27114	-2.62023	3	CL1059	DC	3	1	6834-0352	5	6-{[(2-methylphenyl)amino]methyl}-5H-pyrrolo[3,4-b]pyridine-5,7(6H)-dione	62.3	O=C1N(CNc2c(C)cccc2)C(=O)c2c1nccc2	3	0.92	2.31	-0.01
omega_62066	-10.2511	-12.0165	0.395668	4.42643	4.68682	-3.84841	-3.89515	3	CL5013	DC	7	2	D205-0317	7	N-(6-benzyl-7-hydroxy-5-methyl[1,2,4]triazolo[1,5-a]pyrimidin-2-yl)acetamide	92.41	O=C(Nc1nn2C(O)=C(Cc3ccccc3)C(C)=Nc2n1)C	210	-1.83	1.26	-3.11
omega_103320	-10.2431	-12.8826	0.428666	4.81002	4.22775	-4.07034	-2.75658	3	CL8250	DC	4	2	D433-1469	6	6-benzyl-2-{[(2-fluorophenyl)amino]methyl}-5-methyl[1,2,4]triazolo[1,5-a]pyrimidin-7(4H)-one	71.84	Fc1c(NCc2nn3C(=O)C(Cc4ccccc4)=C(C)Nc3n2)cccc1	182	1.66	3.14	-3.12
omega_281949	-10.2421	-11.2133	0.598587	5.35901	5.54171	-6.49741	-4.03067	3	CL6077	DC	5	1	G192-0115	6	2-{5-[3-(2-naphthyl)-1H-pyrazol-5-yl]-1,2,4-oxadiazol-3-yl}pyridine	80.49	c1(-c2[nH]nc(-c3cc4c(cc3)cccc4)c2)onc(-c2ncccc2)n1	59	2.06	4.01	-2.82
omega_22686	-10.2396	-11.6929	0.605068	4.48856	4.29743	-4.50904	-3.42868	5	CV0299	DC	5	2	C720-0656	6	N-(2-chlorobenzyl)-2-hydroxy-4-oxo-4H-pyrido[1,2-a]pyrimidine-3-carboxamide	82	Clc1c(CNC(=O)C=2C(=O)N3C(=NC=2O)C=CC=C3)cccc1	71	1.29	1.48	-3.73
omega_611498	-10.2329	-11.1125	0.385745	4.49787	3.90583	-4.39365	-3.51619	5		DC	5	3	8018-4704	5	4-(3,4-diethoxyphenyl)-1H-pyrazol-3-amine	73.16	O(CC)c1c(OCC)ccc(-c2c(N)n[nH]c2)c1	33	1.37	1.37	-3.35
omega_911810	-10.2292	-11.6951	0.462124	5.52615	4.59696	-4.05861	-5.06074	6		DC	6	3	Y041-7672	6	N-[2-(1H-1,3-benzimidazol-2-yl)ethyl]-3-(3,5-dimethyl-1H-pyrazol-4-yl)propanamide	86.46	O=C(NCCc1[nH]c2c(n1)cccc2)CCc1c(C)[nH]nc1C	23	2.6	2.63	-3.82
omega_1500232	-10.2193	-13.4001	0.454168	4.96147	2.9296	-2.82921	-2.33521	4	CM0615	NC	3	2	P574-1476	6	2-amino-3-[2-(2,3-dihydro-1H-indol-1-yl)-2-oxoethyl]-6-ethyl-4(3H)-pyrimidinone	79	O=C(CN1C(N)=NC(CC)=CC1=O)N1c2c(cccc2)CC1	18	1.423	1.621	-2
omega_1500119	-10.2174	-12.5067	0.310087	4.15128	3.66075	-3.25237	-2.58041	4	CM0615	NC	4	3	P574-0930	6	2-[2-amino-4-methyl-6-oxo-1(6H)-pyrimidinyl]-N~1~-(2-fluorophenyl)acetamide	87.79	Fc1c(NC(=O)CN2C(N)=NC(C)=CC2=O)cccc1	99	1.696	1.022	-0.11
omega_603019	-10.2161	-11.4813	0.332345	4.49677	4.03311	-4.92679	-2.67015	2		DC	6	1	8016-0392	6	3-(1-naphthylmethyl)-3,6-dihydro-7H-[1,2,3]triazolo[4,5-d]pyrimidin-7-one	72.17	O=C1NC=Nc2n(Cc3c4c(ccc3)cccc4)nnc12	31	0.97	1.09	-3.46
omega_22704	-10.2128	-10.4893	0.598709	3.84952	4.22429	-4.69464	-3.70142	7	CV0299	DC	5	2	C720-0676	8	2-hydroxy-N-[3-(1H-imidazol-1-yl)propyl]-4-oxo-4H-pyrido[1,2-a]pyrimidine-3-carboxamide	99.82	O=C(NCCCn1cncc1)C=1C(=O)N2C(=NC=1O)C=CC=C2	4	-1.22	-1.51	-0.88
omega_601536	-10.1995	-7.13566	0.20817	2.1529	4.98329	-5.89108	-4.51708	1		DC	6	2	8015-8165	6	3-(2H-1,2,3,4-tetraazol-5-ylamino)-2-cyclohexen-1-one	83.56	O=C1C=C(Nc2n[nH]nn2)CCC1	31	-2.45	-0.95	-1.12
omega_651530	-10.191	-10.9739	0.280331	4.03781	4.44837	-5.42177	-2.56182	3		DC	5	1	C200-7343	7	3-(3-methoxybenzyl)-3,6-dihydro-7H-[1,2,3]triazolo[4,5-d]pyrimidin-7-one	81.4	O(C)c1cc(Cn2nnc3C(=O)NC=Nc23)ccc1	40	0.48	0.38	-2.93
omega_284919	-10.191	-12.1227	0.665592	4.27916	4.19575	-4.8162	-2.39253	4	CL6481	DC	7	1	G205-0831	7	N-(4-chlorobenzyl)-5-oxo-2-(1-pyrrolidinyl)-5H-[1,3,4]thiadiazolo[3,2-a]pyrimidine-6-carboxamide	102.67	Clc1ccc(CNC(=O)C=2C(=O)N3N=C(N4CCCC4)SC3=NC=2)cc1	1	1.87	1.87	-4.64
omega_618937	-10.1773	-11.1272	0.338261	4.28963	4.04837	-4.83625	-2.89011	1		DC	5	2	8019-6433	5	1-(1H-1,2,3,4-tetraazol-5-yl)-2,3,4,9-tetrahydro-1H-carbazole	70.25	c1(C2c3[nH]c4c(c3CCC2)cccc4)[nH]nnn1	41	2.39956	3.06	-3.4704
omega_1500120	-10.1741	-12.3472	0.331737	4.00613	3.68558	-3.25851	-2.59184	4	CM0615	NC	4	3	P574-0931	6	2-[2-amino-4-methyl-6-oxo-1(6H)-pyrimidinyl]-N~1~-(3-fluorophenyl)acetamide	87.79	Fc1cc(NC(=O)CN2C(N)=NC(C)=CC2=O)ccc1	112	1.487	1.022	-0.18
omega_6224	-10.1568	-11.8927	0.416282	4.72856	4.11442	-4.51402	-3.00934	4		DC	5	2	C612-0901	5	N-(2-chloro-4-methylphenyl)-3-(hydroxymethyl)-2-pyrazinecarboxamide	75.11	Clc1c(NC(=O)c2c(CO)nccn2)ccc(C)c1	1	2.16	2.16	-2.71
omega_62089	-10.15	-11.7035	0.407479	4.61873	4.7149	-4.03887	-4.14877	6	CL5013	DC	6	2	D205-0343	7	N-(6-benzyl-7-hydroxy-5-methyl[1,2,4]triazolo[1,5-a]pyrimidin-2-yl)thiophene-2-carboxamide	120.65	O=C(Nc1nn2C(O)=C(Cc3ccccc3)C(C)=Nc2n1)c1sccc1	103	1.52	3.8	-1.47
omega_22597	-10.1482	-11.7809	0.770897	4.7223	4.22752	-4.5581	-3.52989	4	CV0299	DC	6	2	C720-0538	6	2-hydroxy-9-methyl-4-oxo-N-(1-phenylethyl)-4H-pyrido[1,2-a]pyrimidine-3-carboxamide	82	O=C(NC(C)c1ccccc1)C=1C(=O)N2C(C(C)=CC=C2)=NC=1O	2	1.2	3.48	-3.9
omega_941174	-10.1468	-10.7705	0.504559	4.40125	5.13867	-5.72429	-3.69651	3		DC	5	2	8017-4447	5	4-{(E)-2-[3-(2-thienyl)-1H-pyrazol-4-yl]-1-ethenyl}-6-(trifluoromethyl)-2(3H)-pyrimidinone	98.38	FC(F)(F)C1=NC(=O)NC(/C=C/c2c(-c3sccc3)n[nH]c2)=C1	31	0.14	0.15	-3.26
omega_6266	-10.1427	-12.5239	0.325064	4.60445	5.07251	-3.82423	-3.7966	4	CL1273	DC	6	2	C612-1045	6	3-({[3-(methylthio)phenyl]amino}carbonyl)pyrazine-2-carboxylic acid	117.48	S(C)c1cc(NC(=O)c2c(C(=O)O)nccn2)ccc1	8	-2.19	1.32	0.82
omega_914669	-10.1384	-14.9566	0.732012	6.37894	3.85225	-2.64804	-3.49701	8		DC	7	2	Y042-3616	7	N-[2-(1H-indol-3-yl)ethyl]-2-(3-methoxypropyl)-1,3-dioxo-5-isoindolinecarboxamide	91.5	O=C(NCCc1c2c([nH]c1)cccc2)c1cc2C(=O)N(CCCOC)C(=O)c2cc1	30	2.19	2.19	-4.2
omega_1500397	-10.1327	-12.9198	0.438553	4.28988	4.26582	-3.68666	-2.52048	6	CM0615	NC	5	3	P574-4681	7	2-[2-amino-4-(methoxymethyl)-6-oxo-1(6H)-pyrimidinyl]-N~1~-(3-fluorophenyl)acetamide	97.02	Fc1cc(NC(=O)CN2C(N)=NC(COC)=CC2=O)ccc1	1	0.881	0.543	-1.92
omega_1500098	-10.1267	-11.7156	0.316954	3.6388	3.74826	-3.50936	-2.60584	4	CM0615	NC	3	3	P574-0879	6	2-[2-amino-4-methyl-6-oxo-1(6H)-pyrimidinyl]-N~1~-phenylacetamide	87.79	O=C(Nc1ccccc1)CN1C(N)=NC(C)=CC1=O	141	1.463	0.817	-0.25
omega_62069	-10.1164	-12.193	0.517125	4.77144	4.75821	-4.15637	-3.81372	7	CL5013	DC	5	2	D205-0320	7	N-(6-benzyl-7-hydroxy-5-methyl[1,2,4]triazolo[1,5-a]pyrimidin-2-yl)butanamide	92.41	O=C(Nc1nn2C(O)=C(Cc3ccccc3)C(C)=Nc2n1)CCC	172	1.2	3.53	-0.72
omega_62097	-10.113	-11.585	0.402312	4.41949	4.77349	-4.21145	-3.91181	6	CL5013	DC	5	2	D205-0356	7	N-(6-benzyl-7-hydroxy-5-methyl[1,2,4]triazolo[1,5-a]pyrimidin-2-yl)cyclopropanecarboxamide	92.41	O=C(Nc1nn2C(O)=C(Cc3ccccc3)C(C)=Nc2n1)C1CC1	257	0.5	3.17	-2.58
omega_1500401	-10.1076	-12.6266	0.462608	4.46704	4.33285	-3.95011	-2.79339	6	CM0615	NC	6	3	P574-4690	7	2-[2-amino-4-(methoxymethyl)-6-oxo-1(6H)-pyrimidinyl]-N~1~-(2-chloro-4-fluorophenyl)acetamide	97.02	Clc1c(NC(=O)CN2C(N)=NC(COC)=CC2=O)ccc(F)c1	26	1.135	1.207	-2.52
omega_586617	-10.1049	-13.5808	0.488746	5.91618	2.93402	-3.84419	-2.01881	4	CL1307	DC	4	1	8013-2888	4	6-chloro-N-mesityl-2-methoxy-4-methylnicotinamide	51.22	Clc1nc(OC)c(C(=O)Nc2c(C)cc(C)cc2C)c(C)c1	32	3.82	4.81	-4.76
omega_798619	-10.0994	-12.1822	0.330751	4.56512	5.07083	-3.97641	-3.90751	3		DC	6	2	8016-7731	6	3-(4-toluidinocarbonyl)-2-pyrazinecarboxylic acid	92.18	O=C(O)c1c(C(=O)Nc2ccc(C)cc2)nccn1	31	-1.37	1.77	-2.57
omega_626929	-10.0922	-13.1049	0.388007	4.53861	3.66746	-3.62573	-1.95574	3	CL2653	DC	4	1	8525-0606	5	6-(3-chlorobenzyl)-2-ethyl-5-methyl[1,2,4]triazolo[1,5-a]pyrimidin-7(4H)-one	59.81	Clc1cc(CC=2C(=O)n3nc(CC)nc3NC=2C)ccc1	75	1.58	3.22	-1.71
omega_22628	-10.0853	-9.26642	0.596055	3.13101	4.87864	-4.94787	-4.47673	7	CV0299	DC	5	3	C720-0579	7	2-hydroxy-N-(3-hydroxypropyl)-8-methyl-4-oxo-4H-pyrido[1,2-a]pyrimidine-3-carboxamide	102.23	O=C(NCCCO)C=1C(=O)N2C(=NC=1O)C=C(C)C=C2	10	-1.89	-0.79	-0.5
omega_1500384	-10.0773	-12.6469	0.471261	4.50592	4.31374	-4.03777	-2.68353	7	CM0615	NC	4	3	P574-4665	7	2-[2-amino-4-(methoxymethyl)-6-oxo-1(6H)-pyrimidinyl]-N~1~-(2-ethylphenyl)acetamide	97.02	O=C(Nc1c(CC)cccc1)CN1C(N)=NC(COC)=CC1=O	253	1.292	1.28	0.27
omega_1500241	-10.0743	-12.8438	0.474911	4.74026	3.08024	-3.04581	-2.4801	2	CM0615	NC	2	2	P574-1930	6	2-amino-3-[2-(2,3-dihydro-1H-indol-1-yl)-2-oxoethyl]-5,6-dimethyl-4(3H)-pyrimidinone	79	O=C(CN1C(=O)C(C)=C(C)N=C1N)N1c2c(cccc2)CC1	79	1.928	0.425	-0.44
omega_397795	-10.0721	-11.8916	0.404212	3.90936	4.67987	-4.87751	-2.29641	6		DC	6	2	2397-0173	6	2-bromo-N~1~-(3-{2-[(E)-1-(2-furyl)methylidene]hydrazino}-3-oxopropyl)benzamide	83.7	Brc1c(C(=O)NCCC(=O)N/N=C/c2occc2)cccc1	5	2.33771	2.77	-2.65093
omega_1500257	-10.0681	-13.5343	0.579833	4.71084	4.21092	-3.3797	-2.65575	7	CM0615	NC	5	3	P574-2329	8	methyl 2-{[(2-amino-4-ethyl-5-methyl-6-oxopyrimidin-1(6H)-yl)acetyl]amino}benzoate	114.09	O=C(Nc1c(C(=O)OC)cccc1)CN1C(=O)C(C)=C(CC)N=C1N	165	2.312	1.749	-1.38
omega_1500228	-10.0643	-12.0383	0.474041	4.00418	3.72033	-3.55293	-2.67165	5	CM0615	NC	5	3	P574-1426	6	2-[2-amino-4-ethyl-6-oxo-1(6H)-pyrimidinyl]-N-(2-chloro-4-fluorophenyl)acetamide	87.79	Clc1c(NC(=O)CN2C(N)=NC(CC)=CC2=O)ccc(F)c1	1	1.264	2.21	-0.49
omega_1500391	-10.0632	-13.5759	0.374816	4.36187	4.77779	-3.41639	-2.58545	7	CM0615	NC	5	3	P574-4673	8	2-[2-amino-4-(methoxymethyl)-6-oxo-1(6H)-pyrimidinyl]-N~1~-(3-methoxyphenyl)acetamide	106.25	O=C(Nc1cc(OC)ccc1)CN1C(N)=NC(COC)=CC1=O	163	0.481	0.321	0.64
omega_277649	-10.0514	-12.5198	0.441132	4.86797	2.80235	-3.66579	-1.97726	4	CL5886	DC	4	0	G020-0246	5	6-benzyl-2-ethyl-5-(methylthio)-2,6-dihydro-7H-pyrazolo[4,3-d]pyrimidin-7-one	75.79	S(C)C=1N(Cc2ccccc2)C(=O)c2nn(CC)cc2N=1	4	2.75	2.69	-5.8
omega_913016	-10.0452	-11.8258	0.415654	5.07667	3.903	-3.59816	-4.01664	3		DC	5	3	Y041-8967	5	N-(1H-indol-6-yl)-2-(3-oxo-2,3-dihydro-1H-isoindol-1-yl)acetamide	73.99	O=C(Nc1cc2[nH]ccc2cc1)CC1NC(=O)c2c1cccc2	82	0.65	0.65	-3.42
omega_402963	-10.0416	-11.8043	0.293375	4.5768	2.49086	-2.23953	-3.3588	7	CL9808	DC	6	3	2729-0378	6	3-hydroxy-N'-[(1E)-(2-hydroxy-5-methoxyphenyl)methylene]-1-benzothiophene-2-carbohydrazide	91.15	O=C(NN=Cc1c(O)ccc(OC)c1)c1c(O)c2c(s1)cccc2	18	1.64	3.19	-1.94
omega_953085	-10.039	-11.6402	0.606523	3.67477	4.44015	-4.4974	-2.62285	5		DC	7	3	Y042-6969	7	N~5~-[2-(1H-1,3-benzimidazol-2-yl)ethyl]-3-(2-furyl)-1H-pyrazole-5-carboxamide	99.6	O=C(NCCc1[nH]c2c(n1)cccc2)c1[nH]nc(-c2occc2)c1	30	3.99	4.02	-4.39
omega_535677	-10.0382	-11.7587	0.343832	4.67857	3.25508	-2.43718	-4.11978	7		DC	4	3	8003-1841	6	N~1~-(2,5-dimethylphenyl)-2-{2-[(E)-1-(2-hydroxyphenyl)methylidene]hydrazino}-2-oxoacetamide	90.79	O=C(NN=Cc1c(O)cccc1)C(=O)Nc1c(C)ccc(C)c1	11	1.95	2.65	-1.62
omega_22689	-10.0356	-10.8848	0.745243	4.12163	4.21749	-4.66472	-3.57044	5	CV0299	DC	4	2	C720-0659	6	2-hydroxy-N-(4-methylbenzyl)-4-oxo-4H-pyrido[1,2-a]pyrimidine-3-carboxamide	82	O=C(NCc1ccc(C)cc1)C=1C(=O)N2C(=NC=1O)C=CC=C2	80	0.91	1.31	-1.93
omega_453534	-10.0231	-8.89433	0.550657	4.19934	4.40491	-5.80854	-4.47517	3		DC	4	2	4112-1254	5	3-methylbenzaldehyde (5-chloro-6-oxo-1,6-dihydropyridazin-4-yl)hydrazone	65.85	ClC=1C(=O)NN=CC=1NN=Cc1cc(C)ccc1	2	2.86	1.76	-2.84
omega_128678	-10.019	-14.0139	0.523221	5.53526	3.66924	-3.70836	-2.0245	3		DC	5	1	D718-0281	5	5-methyl-2-(methylsulfanyl)-6-(1-naphthylmethyl)[1,2,4]triazolo[1,5-a]pyrimidin-7(4H)-one	85.11	S(C)c1nn2C(=O)C(Cc3c4c(ccc3)cccc4)=C(C)Nc2n1	1	4.31	4.31	-5.68
omega_22606	-10.0182	-11.6761	0.74068	4.47821	4.12628	-4.08985	-3.59745	5	CV0299	DC	6	2	C720-0552	6	N-(2,6-difluorobenzyl)-2-hydroxy-9-methyl-4-oxo-4H-pyrido[1,2-a]pyrimidine-3-carboxamide	82	Fc1c(CNC(=O)C=2C(=O)N3C(C(C)=CC=C3)=NC=2O)c(F)ccc1	10	0.96	1.78	-4.31
omega_1500385	-10.0007	-12.7743	0.457288	4.51757	4.25105	-3.79659	-2.65572	7	CM0615	NC	4	3	P574-4666	7	2-[2-amino-4-(methoxymethyl)-6-oxo-1(6H)-pyrimidinyl]-N~1~-(3-ethylphenyl)acetamide	97.02	O=C(Nc1cc(CC)ccc1)CN1C(N)=NC(COC)=CC1=O	252	1.669	1.28	0.6
omega_62098	-9.99702	-11.9216	0.470284	4.70047	4.70279	-3.9098	-4.03913	6	CL5013	DC	5	2	D205-0357	7	N-(6-benzyl-7-hydroxy-5-methyl[1,2,4]triazolo[1,5-a]pyrimidin-2-yl)cyclohexanecarboxamide	92.41	O=C(Nc1nn2C(O)=C(Cc3ccccc3)C(C)=Nc2n1)C1CCCCC1	170	1.6	4.54	-2.68
omega_62101	-9.99295	-11.8028	0.586102	4.78547	4.70285	-3.9408	-4.32374	8	CL5013	DC	5	2	D205-0361	7	N-(6-benzyl-7-hydroxy-5-methyl[1,2,4]triazolo[1,5-a]pyrimidin-2-yl)pentanamide	92.41	O=C(Nc1nn2C(O)=C(Cc3ccccc3)C(C)=Nc2n1)CCCC	214	1.87	3.99	-1.38
omega_535051	-9.9819	-12.8425	0.354401	4.75769	3.24636	-2.42662	-3.07121	7		DC	4	3	8003-0828	6	N~1~-(2,6-dimethylphenyl)-2-{2-[(E)-1-(2-hydroxyphenyl)methylidene]hydrazino}-2-oxoacetamide	90.79	O=C(NN=Cc1c(O)cccc1)C(=O)Nc1c(C)cccc1C	2	1.89	2.65	-1.75
omega_1500388	-9.98122	-12.5183	0.484662	4.18878	4.36988	-3.9452	-2.56106	6	CM0615	NC	4	3	P574-4670	7	2-[2-amino-4-(methoxymethyl)-6-oxo-1(6H)-pyrimidinyl]-N~1~-(2,5-dimethylphenyl)acetamide	97.02	O=C(Nc1c(C)ccc(C)c1)CN1C(N)=NC(COC)=CC1=O	279	1.07	1.31	0.67
omega_1500224	-9.9778	-12.4397	0.399176	4.01187	3.72717	-3.18559	-2.49072	5	CM0615	NC	4	3	P574-1414	6	2-(2-amino-4-ethyl-6-oxopyrimidin-1(6H)-yl)-N-(3-fluorophenyl)acetamide	87.79	Fc1cc(NC(=O)CN2C(N)=NC(CC)=CC2=O)ccc1	122	1.881	1.546	-0.68
omega_732459	-9.97659	-13.8436	0.423821	5.35076	2.45107	-1.02326	-3.33537	6		DC	4	4	K007-0554	5	(1Z)-1-(2,3,4-trihydroxyphenyl)ethanone (2,3-dimethylphenyl)hydrazone	85.08	Oc1c(O)c(C(=NNc2c(C)c(C)ccc2)C)ccc1O	12	4.07	3.16	-2.58
omega_671318	-9.97651	-13.5213	0.376686	5.27714	4.0839	-2.79531	-3.3976	4	CL2724	DC	6	1	C301-1067	9	2-(3-chlorophenyl)-5-nitro-N-(pyridin-2-ylmethyl)-2H-1,2,3-triazol-4-amine 3-oxide	114.02	Clc1cc(-n2[n+]([O-])c(NCc3ncccc3)c([N+](=O)[O-])n2)ccc1	30	2.41	4.27	-4.55
omega_917683	-9.96817	-11.7956	0.294315	4.42107	4.65461	-3.45784	-4.08473	3		DC	6	2	Y043-3266	6	N-(1H-1,2,4-triazol-3-yl)-2-[2-(trifluoromethoxy)phenyl]acetamide	79.9	FC(F)(F)Oc1c(CC(=O)Nc2n[nH]cn2)cccc1	30	1.92	1.92	-3.42
omega_945294	-9.96637	-10.8986	0.191944	3.87049	4.77223	-3.88479	-4.01768	4		DC	7	2	8018-6163	7	N-(1,3-benzodioxol-5-ylmethyl)-N-[2-(1H-1,2,3,4-tetraazol-5-yl)phenyl]amine	84.95	N(Cc1cc2OCOc2cc1)c1c(-c2[nH]nnn2)cccc1	31	0.16	1.85	-3.81
omega_652619	-9.96557	-10.8801	0.238181	4.14156	4.18799	-5.1096	-2.54355	2		DC	6	1	C200-9369	6	3-(3,5-difluorobenzyl)-3,6-dihydro-7H-[1,2,3]triazolo[4,5-d]pyrimidin-7-one	72.17	Fc1cc(F)cc(Cn2nnc3C(=O)NC=Nc23)c1	21	0.1	0.81	-3.85
omega_1289547	-9.96425	-12.4784	0.704721	4.76115	3.31932	-4.21183	-2.05917	4	CL7852	NC	4	1	F692-0295	5	7,8-dimethyl-4-oxo-N-(1-phenylethyl)-4H-[1,3]thiazino[3,2-a]benzimidazole-2-carboxamide	89.29	O=C(NC(C)c1ccccc1)C=1Sc2n(C(=O)C=1)c1c(n2)cc(C)c(C)c1	10	3	4.52	-2.35
omega_285118	-9.95801	-11.2225	0.49056	4.62333	4.60204	-5.32221	-3.12924	4	CL6481	DC	5	1	G205-2408	7	N-cyclohexyl-2-(3-methylpiperidin-1-yl)-5-oxo-5H-[1,3,4]thiadiazolo[3,2-a]pyrimidine-6-carboxamide	102.67	O=C(NC1CCCCC1)C=1C(=O)N2N=C(N3CC(C)CCC3)SC2=NC=1	23	2.97	3.49	-3
omega_22690	-9.94913	-11.7683	0.610373	4.20747	5.34453	-4.75606	-3.58713	5	CV0299	DC	6	2	C720-0660	8	N-(1,3-benzodioxol-5-ylmethyl)-2-hydroxy-4-oxo-4H-pyrido[1,2-a]pyrimidine-3-carboxamide	100.46	O=C(NCc1cc2OCOc2cc1)C=1C(=O)N2C(=NC=1O)C=CC=C2	58	-0.13	0.59	-2.08
omega_90502	-9.94827	-11.516	0.690278	4.33867	3.84464	-4.82186	-2.48399	4	CL2813A	DC	4	1	D358-0165	5	3-methyl-5-oxo-N-(1-phenylethyl)-5H-[1,3]thiazolo[3,2-a]pyrimidine-6-carboxamide	87.07	O=C(NC(C)c1ccccc1)C=1C(=O)N2C(C)=CSC2=NC=1	199	1.29	1.52	-4.45
omega_434957	-9.94347	-11.8865	0.347787	4.26477	3.97543	-3.22465	-3.42027	5		DC	3	3	3564-0451	5	3-hydroxy-N'-[(1E)-1H-pyrrol-2-ylmethylene]-2-naphthohydrazide	77.48	O=C(NN=Cc1[nH]ccc1)c1c(O)cc2c(c1)cccc2	29	3.54	2.71	-1.03
omega_113281	-9.94288	-12.6849	0.478519	5.37882	4.22044	-4.31811	-3.0177	4	CL7372	DC	4	2	D489-0156	7	5-{[(4-methylphenyl)amino]methyl}-2-(2-thienyl)[1,2,4]triazolo[1,5-a]pyrimidin-7(4H)-one	100.08	O=C1n2nc(-c3sccc3)nc2NC(CNc2c(C)cccc2)=C1	112	1.46	2.56	-1.15
omega_1470529	-9.93809	-13.1787	0.416851	5.05417	2.64504	-3.34161	-1.53382	4	CL9870	NC	4	1	M710-0046	3	N-(5-chloro-2-methylphenyl)-6-(3-thienyl)nicotinamide	70.23	Clc1cc(NC(=O)c2cnc(-c3cscc3)cc2)c(C)cc1	3	4.385	3.859	-5.7
omega_22645	-9.93641	-10.2104	0.596936	3.47134	4.36136	-4.59061	-3.56508	5	CV0299	DC	5	2	C720-0603	7	N-(2-furylmethyl)-2-hydroxy-8-methyl-4-oxo-4H-pyrido[1,2-a]pyrimidine-3-carboxamide	95.14	O=C(NCc1occc1)C=1C(=O)N2C(=NC=1O)C=C(C)C=C2	41	-0.04	-0.11	-1.99
omega_376385	-9.9324	-12.3072	0.506059	4.38464	2.38148	-2.96101	-1.93638	6		DC	7	2	1761-1800	10	N'-[(1E)-(2-hydroxy-1-naphthyl)methylene]-2-(3-nitro-1H-1,2,4-triazol-1-yl)acetohydrazide	138.22	O=[N+]([O-])c1nn(CC(=O)NN=Cc2c(O)ccc3c2cccc3)cn1	5	1.3	1.56	-0.19
omega_863662	-9.93212	-11.2528	0.324357	4.09148	2.77833	-3.69591	-2.17761	2		DC	5	0	Y010-0475	5	6-(3-methylbenzyl)[1,2,3]thiadiazolo[5,4-d]pyrimidin-7(6H)-one	86.69	O=C1N(Cc2cc(C)ccc2)C=Nc2snnc12	6	2.45479	3.21	-4.1868
omega_22433	-9.932	-11.9328	0.650181	4.32306	3.73773	-4.44445	-2.26572	3	CL3531	DC	5	1	C720-0008	5	4-oxo-N-(1-phenylethyl)-4H-pyrido[1,2-a]pyrimidine-3-carboxamide	61.77	O=C(NC(C)c1ccccc1)C=1C(=O)N2C(=NC=1)C=CC=C2	2	1.9	1.9	0.0961
omega_62084	-9.93159	-11.6969	0.454768	4.80443	4.7543	-4.18213	-4.06602	6	CL5013	DC	5	2	D205-0338	7	N-(6-benzyl-7-hydroxy-5-methyl[1,2,4]triazolo[1,5-a]pyrimidin-2-yl)-3-methylbenzamide	92.41	O=C(Nc1nn2C(O)=C(Cc3ccccc3)C(C)=Nc2n1)c1cc(C)ccc1	214	1.49	4.56	-2.9
omega_6390	-9.92242	-12.8349	0.511202	5.36968	4.38926	-4.05391	-3.3037	5		DC	8	2	C612-1434	5	N-[4-chloro-3-(trifluoromethyl)phenyl]-3-(hydroxymethyl)pyrazine-2-carboxamide	75.11	Clc1c(C(F)(F)F)cc(NC(=O)c2c(CO)nccn2)cc1	53	0.55	1.96	-1.47
omega_62085	-9.92222	-11.6865	0.46809	4.47123	4.70554	-4.16972	-3.71082	6	CL5013	DC	6	2	D205-0339	7	N-(6-benzyl-7-hydroxy-5-methyl[1,2,4]triazolo[1,5-a]pyrimidin-2-yl)-3-chlorobenzamide	92.41	Clc1cc(C(=O)Nc2nn3C(O)=C(Cc4ccccc4)C(C)=Nc3n2)ccc1	131	2.05	4.74	-4.8
omega_284928	-9.92172	-12.1591	0.698209	4.44257	4.431	-4.93849	-2.39589	5	CL6481	DC	5	1	G205-0853	7	N-(4-methylbenzyl)-5-oxo-2-pyrrolidin-1-yl-5H-[1,3,4]thiadiazolo[3,2-a]pyrimidine-6-carboxamide	102.67	O=C(NCc1ccc(C)cc1)C=1C(=O)N2N=C(N3CCCC3)SC2=NC=1	180	2.23	2.93	-3.79
omega_584943	-9.91807	-13.9785	0.418101	5.71401	2.6499	-3.17028	-1.55126	3		DC	4	1	8013-0895	3	2,6-dichloro-N~3~-mesityl-4-methylnicotinamide	41.99	Clc1c(C(=O)Nc2c(C)cc(C)cc2C)c(C)cc(Cl)n1	45	4.2	5.16	-4.29
omega_794512	-9.91711	-9.66511	0.746329	4.22849	5.41775	-5.94718	-4.69739	3		DC	6	3	8016-5424	6	3-(4-fluorophenyl)-1H-pyrazole-4-carbaldehyde 4-(1H-1,3-benzimidazol-2-yl)hydrazone	81.75	Fc1ccc(-c2c(/C=N\Nc3[nH]c4c(n3)cccc4)c[nH]n2)cc1	31	3.17	3.35	-5.07
omega_946559	-9.91569	-8.9932	0.215203	2.77053	5.37302	-5.31867	-3.96259	3		DC	6	2	8019-7868	6	2-(2H-1,2,3,4-tetraazol-5-ylmethyl)benzoic acid	91.76	O=C(O)c1c(Cc2n[nH]nn2)cccc1	31	-3.45	0.66	-2.04
omega_952751	-9.91259	-11.6067	0.671059	4.33671	5.92056	-5.52349	-3.7107	3		DC	7	2	Y042-6552	7	N~6~-[(1S)-1-(1H-1,3-benzimidazol-2-yl)ethyl]-5-oxo-5H-[1,3]thiazolo[3,2-a]pyrimidine-6-carboxamide	115.75	O=C(N[C@@H](C)c1[nH]c2c(n1)cccc2)C=1C(=O)N2C(SC=C2)=NC=1	30	0.49	0.5	-3.75
omega_22700	-9.91199	-10.6871	0.682247	4.0149	4.28478	-4.49591	-3.71091	7	CV0299	DC	4	2	C720-0670	6	2-hydroxy-4-oxo-N-(3-phenylpropyl)-4H-pyrido[1,2-a]pyrimidine-3-carboxamide	82	O=C(NCCCc1ccccc1)C=1C(=O)N2C(=NC=1O)C=CC=C2	13	0.13	1.6	-2.73
omega_174255	-9.90842	-12.1755	0.753093	6.58151	6.86754	-7.07415	-4.86091	9	CL4907	DC	7	3	E796-0221	10	N-[2-(acetylamino)ethyl]-2-[(2-methoxyphenyl)amino]-5-oxo-5H-[1,3,4]thiadiazolo[2,3-b]quinazoline-8-carboxamide	149.79	O=C(NCCNC(=O)c1cc2N=C3SC(Nc4c(OC)cccc4)=NN3C(=O)c2cc1)C	41	0.72	2.23	-2.11
omega_1525100	-9.90825	-9.79979	0.530376	3.94497	4.47879	-5.73484	-3.32775	4	CM1460	NC	5	1	T630-0740	5	4-(5-phenyl-4H-1,2,4-triazol-3-yl)-1-(2-pyridylmethyl)piperidine	57.7	C(N1CCC(c2[nH]c(-c3ccccc3)nn2)CC1)c1ncccc1	1	1.65	1.71	-3.17
omega_282117	-9.89999	-10.4182	0.526382	4.74968	5.5423	-6.42876	-3.87135	3	CL6077	DC	3	3	G192-0739	6	2-{5-[3-(3,4-dimethylphenyl)-1H-pyrazol-5-yl]-1,2,4-oxadiazol-3-yl}pyridine	80.49	Cc1c(C)ccc(-c2n[nH]c(-c3onc(-c4ncccc4)n3)c2)c1	53	1.9	3.61	-1.73
omega_913594	-9.89603	-11.9857	0.77779	5.83465	4.19841	-3.89536	-4.82584	2		DC	5	3	Y042-1907	5	2-hydroxy-N-(2,3,4,9-tetrahydro-1H-carbazol-1-yl)-4-quinolinecarboxamide	78.01	O=C(NC1c2[nH]c3c(c2CCC1)cccc3)c1c2c(nc(O)c1)cccc2	30	3.84	4.83	-4.98
omega_914668	-9.89398	-15.0862	0.722385	7.03667	4.27825	-3.06895	-3.77612	9		DC	7	2	Y042-3615	7	N-[2-(1H-indol-3-yl)ethyl]-2-(3-isopropoxypropyl)-1,3-dioxo-5-isoindolinecarboxamide	91.5	O=C(NCCc1c2c([nH]c1)cccc2)c1cc2C(=O)N(CCCOC(C)C)C(=O)c2cc1	30	3.05	3.05	-4.8
omega_1500123	-9.89338	-12.8603	0.399921	4.45077	3.49084	-2.93153	-2.4431	4	CM0615	NC	5	3	P574-0936	6	2-[2-amino-4-methyl-6-oxo-1(6H)-pyrimidinyl]-N~1~-(3,5-difluorophenyl)acetamide	87.79	Fc1cc(F)cc(NC(=O)CN2C(N)=NC(C)=CC2=O)c1	119	1.221	1.228	-0.05
omega_6271	-9.88668	-11.9751	0.309855	4.69725	4.58226	-3.34248	-4.1585	3		DC	4	2	C612-1070	5	N-(2,4-dimethylphenyl)-3-(hydroxymethyl)pyrazine-2-carboxamide	75.11	O=C(Nc1c(C)cc(C)cc1)c1c(CO)nccn1	9	0.03	1.33	0.96
omega_626932	-9.88101	-13.5928	0.358505	4.74389	3.67328	-3.12968	-1.93419	4	CL2653	DC	4	1	8525-0613	5	6-(3-chlorobenzyl)-5-methyl-2-propyl[1,2,4]triazolo[1,5-a]pyrimidin-7(4H)-one	59.81	Clc1cc(CC=2C(=O)n3nc(CCC)nc3NC=2C)ccc1	32	2.42	3.68	-1.31
omega_62090	-9.87634	-11.4078	0.434265	4.62288	4.71396	-3.9083	-4.33134	7	CL5013	DC	5	2	D205-0344	7	N-(6-benzyl-7-hydroxy-5-methyl[1,2,4]triazolo[1,5-a]pyrimidin-2-yl)-3-methylbutanamide	92.41	O=C(Nc1nn2C(O)=C(Cc3ccccc3)C(C)=Nc2n1)CC(C)C	131	1.78	3.79	-2.06
omega_564256	-9.87205	-10.2416	0.353632	4.18499	4.58311	-2.48322	-6.26894	5		DC	5	4	8009-0495	5	(Z)-2-ammonio-4-oxo-4-(2,3,4,5-tetrafluoro-6-hydroxyphenyl)-2-butenoate	105.07	Fc1c(F)c(F)c(C(=O)/C=C(\[N+H3])/C(=O)[O-])c(O)c1F	26	-2.39	2.21	-2.55
omega_1500398	-9.86852	-11.8542	0.44257	3.6381	4.32907	-3.84032	-2.58372	6	CM0615	NC	5	3	P574-4682	7	2-[2-amino-4-(methoxymethyl)-6-oxo-1(6H)-pyrimidinyl]-N~1~-(4-fluorophenyl)acetamide	97.02	Fc1ccc(NC(=O)CN2C(N)=NC(COC)=CC2=O)cc1	25	0.812	0.543	-1.25
omega_90447	-9.8685	-11.5074	0.561052	4.12856	3.88507	-4.55244	-2.38329	4	CL2813A	DC	5	1	D358-0023	5	N-(4-chlorobenzyl)-5-oxo-5H-[1,3]thiazolo[3,2-a]pyrimidine-6-carboxamide	87.07	Clc1ccc(CNC(=O)C=2C(=O)N3C(SC=C3)=NC=2)cc1	195	3.4	1.3	-4.87
omega_22685	-9.86811	-11.6758	0.522164	4.48129	4.23306	-4.295	-3.1338	5	CV0299	DC	4	2	C720-0655	6	N-benzyl-2-hydroxy-4-oxo-4H-pyrido[1,2-a]pyrimidine-3-carboxamide	82	O=C(NCc1ccccc1)C=1C(=O)N2C(=NC=1O)C=CC=C2	15	0.19	0.82	-1.34
omega_124351	-9.85899	-9.53094	0.356935	3.64838	5.29152	-5.12613	-4.49874	4	CM0132	DC	6	3	D668-0053	7	N-(2-chlorophenyl)-2-hydroxy-6-oxo-1,6-dihydropyrimidine-5-sulfonamide	116.24	Clc1c(NS(=O)(=O)C=2C(=O)NC(O)=NC=2)cccc1	180	-0.01	0.158	0.94
omega_1512663	-9.8587	-13.5738	0.490217	7.04986	3.55323	-3.56375	-3.81444	3	CM2162	NC	6	2	P932-0104F	6	[3-(hydroxymethyl)-1-methyl-1,4,6,7-tetrahydro-5H-pyrazolo[4,3-c]pyridin-5-yl](1H-indol-5-yl)methanone	74.15	O=C(N1Cc2c(CO)nn(C)c2CC1)c1cc2c([nH]cc2)cc1	1	-0.63	-0.63	-1.88
omega_661554	-9.85837	-11.8379	0.599229	4.41602	3.34419	-4.33722	-2.04267	4	CL2007	DC	5	1	C243-0060	5	N-(4-fluorobenzyl)-4-oxo-4H-pyrido[1,2-a]thieno[2,3-d]pyrimidine-2-carboxamide	61.77	Fc1ccc(CNC(=O)c2sc3N=C4N(C(=O)c3c2)C=CC=C4)cc1	108	0.85	2.49	-2.74
omega_103321	-9.85105	-12.8263	0.441887	4.99917	4.345	-4.09751	-2.71333	3	CL8250	DC	4	2	D433-1470	6	6-benzyl-2-{[(2-chlorophenyl)amino]methyl}-5-methyl[1,2,4]triazolo[1,5-a]pyrimidin-7(4H)-one	71.84	Clc1c(NCc2nn3C(=O)C(Cc4ccccc4)=C(C)Nc3n2)cccc1	228	3.09	3.6	-3.22
omega_612635	-9.84926	-7.88866	0.127489	1.35296	5.55147	-5.50749	-3.48504	3		DC	10	5	8018-6424	10	4-(2H-1,2,3,4-tetraazol-5-yl)-1,2,5-oxadiazole-3-carbohydrazonamide	157.78	N(\N)=C(/N)\c1c(-c2n[nH]nn2)non1	59	-0.0199296	0.023	-1.51169
omega_1500214	-9.84723	-12.6115	0.481463	4.43915	3.79429	-3.2927	-2.65797	6	CM0615	NC	3	3	P574-1372	6	2-(2-amino-4-ethyl-6-oxopyrimidin-1(6H)-yl)-N-(2-ethylphenyl)acetamide	87.79	O=C(Nc1c(CC)cccc1)CN1C(N)=NC(CC)=CC1=O	91	1.667	2.283	0.74
omega_22695	-9.84712	-10.0416	0.528994	3.4686	4.29737	-4.66026	-3.44024	5	CV0299	DC	5	2	C720-0665	7	N-(2-furylmethyl)-2-hydroxy-4-oxo-4H-pyrido[1,2-a]pyrimidine-3-carboxamide	95.14	O=C(NCc1occc1)C=1C(=O)N2C(=NC=1O)C=CC=C2	12	-0.55	-0.55	-1.59
omega_910658	-9.84543	-12.9726	0.72433	6.7787	3.47376	-4.04482	-3.80481	7		DC	5	2	Y041-6180	5	3-(1H-indol-3-yl)-N-[2-(5-methoxy-1H-indol-1-yl)ethyl]propanamide	59.05	O=C(NCCn1c2c(cc(OC)cc2)cc1)CCc1c2c([nH]c1)cccc2	75	4.17	4.17	-4.6
omega_103352	-9.84009	-12.2824	0.578511	4.75194	4.19361	-4.3055	-2.77627	3	CL8250	DC	4	2	D433-1519	6	2-{[(2-fluorophenyl)amino]methyl}-5-methyl-6-(4-methylbenzyl)[1,2,4]triazolo[1,5-a]pyrimidin-7(4H)-one	71.84	Fc1c(NCc2nn3C(=O)C(Cc4ccc(C)cc4)=C(C)Nc3n2)cccc1	242	1.17	3.63	-3.93
omega_6377	-9.83857	-11.9889	0.311967	4.51768	5.10022	-3.99136	-3.78817	5	CL1273	DC	5	2	C612-1331	6	3-{[(3-methylphenyl)amino]carbonyl}pyrazine-2-carboxylic acid	92.18	O=C(O)c1c(C(=O)Nc2cc(C)ccc2)nccn1	7	-2.76	1.26	1.48
omega_6276	-9.83308	-12.0668	0.330931	4.6271	4.46673	-3.73133	-3.45974	3		DC	5	2	C612-1082	5	N-(3-fluoro-4-methylphenyl)-3-(hydroxymethyl)pyrazine-2-carboxamide	75.11	Fc1c(C)ccc(NC(=O)c2c(CO)nccn2)c1	7	-0.04	1.04	0.61
omega_210472	-9.81838	-14.1455	0.508862	5.78684	6.12598	-5.04391	-3.05062	5	CL7676	DC	7	0	F259-0417	7	N~1~-[2-(acetylamino)-1,3-benzothiazol-6-yl]-3-(1H-1,3-benzimidazol-2-yl)propanamide	86.38	O=C(Nc1cc2sc(NC(=O)C)nc2cc1)CCc1[nH]c2c(n1)cccc2	1	2.25	2.25	-3.78
omega_1500226	-9.81299	-12.6619	0.401069	4.33233	3.66009	-3.13815	-2.40639	5	CM0615	NC	4	3	P574-1421	6	2-(2-amino-4-ethyl-6-oxopyrimidin-1(6H)-yl)-N-(3-chlorophenyl)acetamide	87.79	Clc1cc(NC(=O)CN2C(N)=NC(CC)=CC2=O)ccc1	105	2.343	2.005	0.87
omega_1500109	-9.8123	-13.0131	0.385914	3.97505	4.29405	-3.04226	-2.41198	5	CM0615	NC	4	3	P574-0895	7	2-(2-amino-4-methyl-6-oxopyrimidin-1(6H)-yl)-N-(3-methoxyphenyl)acetamide	97.02	O=C(Nc1cc(OC)ccc1)CN1C(N)=NC(C)=CC1=O	71	1.42	0.8	1.27
omega_62088	-9.812	-11.5629	0.452142	4.66737	4.72377	-4.01958	-4.07279	6	CL5013	DC	6	2	D205-0342	8	N-(6-benzyl-7-hydroxy-5-methyl[1,2,4]triazolo[1,5-a]pyrimidin-2-yl)-2-furamide	105.55	O=C(Nc1nn2C(O)=C(Cc3ccccc3)C(C)=Nc2n1)c1occc1	151	0.6	2.92	-2.5
omega_6226	-9.81015	-11.325	0.315944	4.55416	4.581	-3.73295	-4.20329	3		DC	5	2	C612-0911	5	N-(4-chlorophenyl)-3-(hydroxymethyl)pyrazine-2-carboxamide	75.11	Clc1ccc(NC(=O)c2c(CO)nccn2)cc1	1	0.56	1.02	0.42
omega_1500403	-9.80199	-12.6246	0.46492	4.14061	4.34555	-3.60254	-2.52596	6	CM0615	NC	5	3	P574-4695	7	2-[2-amino-4-(methoxymethyl)-6-oxo-1(6H)-pyrimidinyl]-N~1~-(5-fluoro-2-methylphenyl)acetamide	97.02	Fc1cc(NC(=O)CN2C(N)=NC(COC)=CC2=O)c(C)cc1	98	0.762	1.029	0.37
omega_671817	-9.79602	-10.629	0.173714	3.80608	3.2662	-4.25315	-2.15986	3	CL4136	DC	5	2	C301-2168	5	5-(4-chlorobenzyl)-1,3,4-oxadiazole-2-carboxamide	82.01	Clc1ccc(Cc2oc(C(=O)N)nn2)cc1	1	1.58	1.58	-2.9
omega_6178	-9.78613	-11.965	0.439741	4.68183	5.02269	-4.17418	-3.79117	5	CL1273	DC	6	2	C612-0728	6	3-{[(4-bromo-3-methylphenyl)amino]carbonyl}pyrazine-2-carboxylic acid	92.18	Brc1c(C)cc(NC(=O)c2c(C(=O)O)nccn2)cc1	65	-1.55	2.01	0.8
omega_1512660	-9.78587	-12.5018	0.352215	5.73785	3.10832	-2.44107	-4.04141	4	CM2162	NC	5	1	P932-0007	6	3-furyl[3-(hydroxymethyl)-1-methyl-1,4,6,7-tetrahydro-5H-pyrazolo[4,3-c]pyridin-5-yl]methanone	79.64	O=C(N1Cc2c(CO)nn(C)c2CC1)c1cocc1	5	4.16	4.16	-5.08
omega_285086	-9.78461	-10.958	0.481378	4.52837	4.62142	-5.289	-3.16879	4	CL6481	DC	5	1	G205-2268	7	N-cyclopentyl-2-(3-methylpiperidin-1-yl)-5-oxo-5H-[1,3,4]thiadiazolo[3,2-a]pyrimidine-6-carboxamide	102.67	O=C(NC1CCCC1)C=1C(=O)N2N=C(N3CC(C)CCC3)SC2=NC=1	8	3.05	3.03	-2.25
omega_22693	-9.78452	-10.5106	0.689517	3.77921	4.4165	-4.53171	-3.62742	5	CV0299	DC	5	2	C720-0663	7	2-hydroxy-4-oxo-N-(pyridin-3-ylmethyl)-4H-pyrido[1,2-a]pyrimidine-3-carboxamide	94.89	O=C(NCc1cnccc1)C=1C(=O)N2C(=NC=1O)C=CC=C2	4	-1.52	-0.33	-0.8
omega_358032	-9.7842	-12.4348	0.360283	4.29823	2.52991	-1.81967	-2.71817	6		DC	6	3	0784-0388	8	3-hydroxy-N'-[(E)-1-(2-hydroxy-5-nitrophenyl)methylidene]-2-naphthohydrazide	127.74	O=[N+]([O-])c1cc(C=NNC(=O)c2c(O)cc3c(c2)cccc3)c(O)cc1	53	3.1	2.95	-3.06
omega_1470530	-9.78419	-13.342	0.401035	5.12871	2.56507	-3.05427	-1.48271	4	CL9870	NC	3	1	M710-0051	3	N-(2,5-dimethylphenyl)-6-(3-thienyl)nicotinamide	70.23	O=C(Nc1c(C)ccc(C)c1)c1cnc(-c2cscc2)cc1	131	3.944	3.681	-4.96
omega_1500402	-9.78352	-12.2111	0.437558	4.01114	4.68967	-4.09975	-2.61105	6	CM0615	NC	5	3	P574-4694	7	2-[2-amino-4-(methoxymethyl)-6-oxo-1(6H)-pyrimidinyl]-N~1~-(4-fluoro-2-methylphenyl)acetamide	97.02	Fc1cc(C)c(NC(=O)CN2C(N)=NC(COC)=CC2=O)cc1	63	0.939	1.029	0.39
omega_22657	-9.7828	-10.7	0.639386	3.70817	4.76787	-4.42085	-3.77739	8	CV0299	DC	5	2	C720-0617	7	N-[2-(diethylamino)ethyl]-2-hydroxy-8-methyl-4-oxo-4H-pyrido[1,2-a]pyrimidine-3-carboxamide	85.24	O=C(NCCN(CC)CC)C=1C(=O)N2C(=NC=1O)C=C(C)C=C2	1	-0.36	0.52	-0.25
omega_538856	-9.78229	-12.7883	0.30569	4.41761	1.73983	-1.84437	-1.61275	5		DC	3	3	8003-8158	5	3-hydroxy-N'~2~-[(E)-1-(1H-indol-3-yl)methylidene]-2-naphthohydrazide	77.48	O=C(NN=Cc1c2c([nH]c1)cccc2)c1c(O)cc2c(c1)cccc2	75	3.63	3.06	-3.79
omega_453539	-9.78159	-9.00712	0.483158	4.48279	4.35265	-5.21555	-4.87751	3		DC	4	2	4112-1270	5	cyclohex-3-ene-1-carbaldehyde (5-chloro-6-oxo-1,6-dihydropyridazin-4-yl)hydrazone	65.85	ClC=1C(=O)NN=CC=1NN=CC1CC=CCC1	30	2.36	1.18	-4.12
omega_650605	-9.77617	-9.79875	0.224416	3.67409	3.88193	-5.38302	-2.37484	2		DC	4	1	C200-5586	6	3-benzyl-3,6-dihydro-7H-[1,2,3]triazolo[4,5-d]pyrimidin-7-one	72.17	O=C1NC=Nc2n(Cc3ccccc3)nnc12	66	0.33	0.4	-3.33
omega_947258	-9.77565	-8.60536	0.318522	3.63343	3.79195	-4.66526	-4.24894	3		DC	5	3	8020-2482	5	5-[(3-fluoroanilino)methyl]-1,2-dihydro-3H-1,2,4-triazol-3-one	65.52	Fc1cc(NCC2=NC(=O)NN2)ccc1	31	-0.23	-0.22	-1.56
omega_62083	-9.7747	-11.8032	0.465585	4.58966	4.91467	-4.2805	-3.66089	7	CL5013	DC	6	2	D205-0337	8	N-(6-benzyl-7-hydroxy-5-methyl[1,2,4]triazolo[1,5-a]pyrimidin-2-yl)-2-methoxybenzamide	101.64	O=C(Nc1nn2C(O)=C(Cc3ccccc3)C(C)=Nc2n1)c1c(OC)cccc1	172	1.37	4.06	-3.39
omega_676105	-9.77086	-11.9693	0.546768	4.38717	2.99905	-4.21146	-1.52304	4	CL2518	DC	4	1	C303-0055	3	N-(4-fluorobenzyl)-7-methylthieno[2,3-b]quinoline-2-carboxamide	70.23	Fc1ccc(CNC(=O)c2sc3nc4c(cc3c2)ccc(C)c4)cc1	4	4.44	5.02	-5.16
omega_62082	-9.76613	-11.5976	0.483762	4.73834	4.76069	-4.32711	-3.82421	6	CL5013	DC	6	2	D205-0335	7	N-(6-benzyl-7-hydroxy-5-methyl[1,2,4]triazolo[1,5-a]pyrimidin-2-yl)-2-fluorobenzamide	92.41	Fc1c(C(=O)Nc2nn3C(O)=C(Cc4ccccc4)C(C)=Nc3n2)cccc1	185	1.27	4.28	-3.36
omega_562720	-9.76412	-9.19772	0.360886	3.37619	4.82327	-5.66638	-3.46037	5		DC	6	2	8008-8036	6	N-{2-[(4-chlorobenzyl)oxy]benzyl}-N-(2H-1,2,3,4-tetraazol-5-yl)amine	75.72	Clc1ccc(COc2c(CNc3n[nH]nn3)cccc2)cc1	9	1.35	2.93	-4.39
omega_415237	-9.75764	-12.3816	0.51875	4.85489	3.56949	-3.49458	-2.82456	5		DC	4	3	3237-1538	5	N'-[(1E)-(3-chloro-1H-indol-2-yl)methylene]-3-hydroxy-2-naphthohydrazide	77.48	Clc1c(C=NNC(=O)c2c(O)cc3c(c2)cccc3)[nH]c2c1cccc2	66	4.07	5.13	-4.22
omega_22643	-9.75389	-10.4246	0.71904	3.73349	4.41031	-4.43102	-3.7611	5	CV0299	DC	5	2	C720-0601	7	2-hydroxy-8-methyl-4-oxo-N-(pyridin-3-ylmethyl)-4H-pyrido[1,2-a]pyrimidine-3-carboxamide	94.89	O=C(NCc1cnccc1)C=1C(=O)N2C(=NC=1O)C=C(C)C=C2	35	-0.69	0.12	-0.92
omega_6386	-9.75065	-11.7706	0.252109	4.38241	4.53811	-2.97919	-4.17349	3		DC	4	2	C612-1390	5	3-(hydroxymethyl)-N-(3-methylphenyl)pyrazine-2-carboxamide	75.11	O=C(Nc1cc(C)ccc1)c1c(CO)nccn1	118	0.07	0.84	0.59
omega_618938	-9.7467	-10.2	0.47925	3.85086	3.72629	-4.6471	-2.95599	1		DC	5	2	8019-6434F	5	6-bromo-1-(1H-1,2,3,4-tetraazol-5-yl)-2,3,4,9-tetrahydro-1H-carbazole	70.25	Brc1cc2c([nH]c3C(c4[nH]nnn4)CCCc23)cc1	1	1.28	3.12	-4.41
omega_627404	-9.74102	-13.7324	0.381053	5.09881	3.66863	-3.21248	-1.94466	2	CL2653	DC	7	1	8561-08413	5	6-(3-chlorobenzyl)-5-methyl-2-(trifluoromethyl)[1,2,4]triazolo[1,5-a]pyrimidin-7(4H)-one	59.81	Clc1cc(CC=2C(=O)n3nc(C(F)(F)F)nc3NC=2C)ccc1	50	1.33	3.64	-0.73
omega_22655	-9.74097	-10.6537	0.770424	3.7735	4.71234	-4.82023	-3.52329	7	CV0299	DC	5	2	C720-0614	8	2-hydroxy-8-methyl-4-oxo-N-[3-(2-oxopyrrolidin-1-yl)propyl]-4H-pyrido[1,2-a]pyrimidine-3-carboxamide	102.31	O=C(NCCCN1C(=O)CCC1)C=1C(=O)N2C(=NC=1O)C=C(C)C=C2	60	-0.3	-0.6	-0.3
omega_235627	-9.73298	-12.7502	0.85	5.88922	3.79965	-4.29679	-3.22489	5	CL8057	DC	2	3	F477-2906	4	3-(4-chlorophenyl)-N-(2-hydroxypropyl)thieno[3,2-c]quinoline-2-carboxamide	90.46	Clc1ccc(-c2c(C(=O)NCC(O)C)sc3c2cnc2c3cccc2)cc1	58	6.32	4.32	-6.12
omega_14922	-9.73166	-12.0172	0.538124	4.9223	4.85035	-4.71475	-3.31048	4		DC	7	1	C679-2562	6	7-[(1H-benzimidazol-2-ylthio)methyl]-2-(methylthio)-5H-[1,3,4]thiadiazolo[3,2-a]pyrimidin-5-one	149.61	S(CC=1N=C2SC(SC)=NN2C(=O)C=1)c1[nH]c2c(n1)cccc2	26	2.83	4.01	-3.78
omega_22595	-9.72245	-12.0253	0.620514	4.76117	4.26189	-4.38083	-2.95994	5	CV0299	DC	4	2	C720-0536	6	2-hydroxy-9-methyl-N-(4-methylbenzyl)-4-oxo-4H-pyrido[1,2-a]pyrimidine-3-carboxamide	82	O=C(NCc1ccc(C)cc1)C=1C(=O)N2C(C(C)=CC=C2)=NC=1O	80	1.17	1.86	-2.46
omega_62102	-9.71814	-11.8956	0.532507	4.84945	4.78946	-4.18645	-3.80753	9	CL5013	DC	5	2	D205-0362	7	N-(6-benzyl-7-hydroxy-5-methyl[1,2,4]triazolo[1,5-a]pyrimidin-2-yl)hexanamide	92.41	O=C(Nc1nn2C(O)=C(Cc3ccccc3)C(C)=Nc2n1)CCCCC	224	2.13	4.45	-1.03
omega_285030	-9.71495	-10.541	0.603336	4.54357	4.56839	-5.80789	-3.08137	8	CL6481	DC	5	1	G205-1356	7	N-cyclopentyl-2-(dipropylamino)-5-oxo-5H-[1,3,4]thiadiazolo[3,2-a]pyrimidine-6-carboxamide	102.67	O=C(NC1CCCC1)C=1C(=O)N2N=C(N(CCC)CCC)SC2=NC=1	46	3.54	3.54	-3.09
omega_920350	-9.70951	-10.1678	0.637548	4.23605	4.90977	-5.07166	-4.25344	4		DC	6	2	Y043-7962	6	N-{2-[6-fluoro-4-oxo-3(4H)-quinazolinyl]ethyl}-1H-indole-3-carboxamide	77.56	Fc1cc2C(=O)N(CCNC(=O)c3c4c([nH]c3)cccc4)C=Nc2cc1	30	3.39	3.39	-5.13
omega_87045	-9.70491	-14.4986	0.488686	5.78952	4.74284	-3.68894	-2.53844	4	CL7372	DC	4	2	D351-0053	7	5-{[(2-ethoxyphenyl)amino]methyl}-2-phenyl[1,2,4]triazolo[1,5-a]pyrimidin-7(4H)-one	81.07	O(CC)c1c(NCC=2Nc3n(C(=O)C=2)nc(-c2ccccc2)n3)cccc1	127	2.06	2.68	-3.05
omega_603728	-9.70387	-10.1516	0.318168	4.08688	3.96123	-5.06538	-2.85312	2		DC	6	1	8016-1259	6	3-(2-chlorobenzyl)-3,6-dihydro-7H-[1,2,3]triazolo[4,5-d]pyrimidin-7-one	72.17	Clc1c(Cn2nnc3C(=O)NC=Nc23)cccc1	31	0.37	0.5	-2.94
omega_1004610	-9.69812	-8.35968	0.374223	3.26729	5.15351	-6.02993	-4.10353	1	CM4193	IC	8	2	S636-0103	8	7-(1H-pyrazol-3-ylcarbonyl)-2,5,6,7,8,9-hexahydro-3H-[1,2,4]triazolo[4,3-d][1,4]diazepin-3-one	93.69	O=C(N1CCN2C(=O)NN=C2CC1)c1n[nH]cc1	24	-1.26	-1.22	-2.15
omega_369994	-9.69307	-11.3094	0.482531	4.0568	3.7006	-4.11637	-2.5072	7		DC	6	2	1601-0121	7	N-(2-{2-[(E)-1-(2-furyl)methylidene]hydrazino}-2-oxoethyl)-4-methyl-1-benzenesulfonamide	100.77	[SH0](=O)(ONCC(=O)NN=Cc1occc1)c1ccc(C)cc1	1	3.93	1.33	-3.4
omega_22705	-9.69059	-10.4097	0.644177	4.00497	4.45464	-4.71298	-3.67172	8	CV0299	DC	5	2	C720-0678	7	N-[2-(diethylamino)ethyl]-2-hydroxy-4-oxo-4H-pyrido[1,2-a]pyrimidine-3-carboxamide	85.24	O=C(NCCN(CC)CC)C=1C(=O)N2C(=NC=1O)C=CC=C2	84	-0.93	0.07	0.28
omega_62070	-9.68917	-11.6432	0.417439	4.38054	4.92251	-4.00351	-3.763	7	CL5013	DC	6	2	D205-0321	8	N-(6-benzyl-7-hydroxy-5-methyl[1,2,4]triazolo[1,5-a]pyrimidin-2-yl)-2-methoxyacetamide	101.64	O=C(Nc1nn2C(O)=C(Cc3ccccc3)C(C)=Nc2n1)COC	167	-0.33	2.15	0.27
omega_950610	-9.68815	-10.4225	0.429084	3.32688	3.06457	-3.94309	-2.14306	4	CL4444	DC	5	0	D035-0123	5	3-benzyl-7-(ethylsulfanyl)-4H-[1,3,4]thiadiazolo[2,3-c][1,2,4]triazin-4-one	107.99	S(CC)C=1SC=2N(C(=O)C(Cc3ccccc3)=NN=2)N=1	1	2.63	2.63	-4.12
omega_22621	-9.68751	-9.97278	0.576151	3.63014	4.13028	-4.45483	-3.59648	5	CV0299	DC	4	2	C720-0571	6	2-hydroxy-N-isobutyl-8-methyl-4-oxo-4H-pyrido[1,2-a]pyrimidine-3-carboxamide	82	O=C(NCC(C)C)C=1C(=O)N2C(=NC=1O)C=C(C)C=C2	80	0.19	0.88	-0.92
omega_1534386	-9.68302	-11.7983	0.658113	4.28165	3.18348	-3.84756	-2.16043	3	CL7852	NC	5	1	F692-0246	5	N~2~-benzyl-7,8-dimethyl-4-oxo-4H-[1,3]thiazino[3,2-a][1,3]benzimidazole-2-carboxamide	89.29	O=C(NCc1ccccc1)C=1Sc2n(C(=O)C=1)c1c(n2)cc(C)c(C)c1	1	3.83	3.83	-5.28
omega_1500121	-9.68289	-11.3915	0.388311	3.56618	3.79089	-3.51149	-2.52532	4	CM0615	NC	4	3	P574-0932	6	2-[2-amino-4-methyl-6-oxo-1(6H)-pyrimidinyl]-N~1~-(4-fluorophenyl)acetamide	87.79	Fc1ccc(NC(=O)CN2C(N)=NC(C)=CC2=O)cc1	79	1.513	1.022	-0.2
omega_285059	-9.67908	-10.9249	0.544758	4.72666	4.59658	-5.5382	-3.08395	6	CL6481	DC	5	1	G205-2092	7	N-cyclohexyl-2-(diethylamino)-5-oxo-5H-[1,3,4]thiadiazolo[3,2-a]pyrimidine-6-carboxamide	102.67	O=C(NC1CCCCC1)C=1C(=O)N2N=C(N(CC)CC)SC2=NC=1	51	2.37	2.95	-3.74
omega_415239	-9.67827	-13.6478	0.271758	5.04027	2.34256	-1.37681	-2.30827	6		DC	4	2	3237-1541	5	N'~2~-[(E)-1-(2-hydroxy-5-methylphenyl)methylidene]-6-methoxy-2-naphthohydrazide	70.92	O=C(N/N=C/c1c(O)ccc(C)c1)c1cc2c(cc(OC)cc2)cc1	6	4.16	3.79	-3.62
omega_456354	-9.67246	-8.06967	0.383742	2.65666	6.12889	-5.12658	-5.64551	5	CL1365	DC	4	6	4205-0167	8	3-[4-(5-amino-1H-1,2,4-triazol-3-yl)butyl]-1H-1,2,4-triazol-5-amine	135.18	Nc1[nH]nc(CCCCc2nc(N)[nH]n2)n1	4	-0.02	-0.36	-1.16
omega_22646	-9.6692	-11.5611	0.759781	4.9909	4.11642	-4.23051	-3.74473	6	CV0299	DC	4	2	C720-0605	6	2-hydroxy-8-methyl-4-oxo-N-(2-phenylethyl)-4H-pyrido[1,2-a]pyrimidine-3-carboxamide	82	O=C(NCCc1ccccc1)C=1C(=O)N2C(=NC=1O)C=C(C)C=C2	34	0.71	1.59	-0.58
omega_364633	-9.66342	-13.1744	0.378167	5.3721	1.84892	-1.9115	-2.17673	5		DC	4	2	1270-0063	4	N'-[(1E)-(5-bromo-2-hydroxyphenyl)methylene]-1,1'-biphenyl-4-carbohydrazide	61.69	Brc1cc(/C=N/NC(=O)c2ccc(-c3ccccc3)cc2)c(O)cc1	6	5.61	5.73	-6.76
omega_124466	-9.66171	-10.4056	0.423006	4.21176	5.86408	-5.52754	-4.22746	5	CM0132	DC	6	3	D668-0278	8	2-hydroxy-N-(2-methoxyphenyl)-4-methyl-6-oxo-1,6-dihydro-5-pyrimidinesulfonamide	125.47	S(=O)(=O)(Nc1c(OC)cccc1)C1=C(C)N=C(O)NC1=O	186	-0.2	-0.009	-2.26
omega_87178	-9.65812	-12.7341	0.515939	5.37397	4.22575	-4.04998	-2.9897	4	CL7372	DC	3	2	D351-0429	6	2-(2-methylphenyl)-5-{[(2-methylphenyl)amino]methyl}[1,2,4]triazolo[1,5-a]pyrimidin-7(4H)-one	71.84	O=C1n2nc(-c3c(C)cccc3)nc2NC(CNc2c(C)cccc2)=C1	119	1.22	3.32	-2.87
omega_22630	-9.6564	-10.1553	0.578446	3.79782	4.79401	-4.38936	-4.28205	7	CV0299	DC	5	3	C720-0581	7	2-hydroxy-N-[1-(hydroxymethyl)propyl]-8-methyl-4-oxo-4H-pyrido[1,2-a]pyrimidine-3-carboxamide	102.23	O=C(NC(CO)CC)C=1C(=O)N2C(=NC=1O)C=C(C)C=C2	20	-0.37	0.05	-0.25
omega_945188	-9.6495	-10.5559	0.26559	4.03429	3.8828	-3.9259	-3.3504	4		DC	6	2	8018-5380	6	N-(3-pyridylmethyl)-N-[2-(1H-1,2,3,4-tetraazol-5-yl)phenyl]amine	79.38	N(Cc1cnccc1)c1c(-c2[nH]nnn2)cccc1	31	-2.08	-0.39	-1.89
omega_6229	-9.64903	-11.809	0.264243	4.13122	4.40507	-2.80426	-3.83634	3		DC	5	2	C612-0917	5	N-(3-chlorophenyl)-3-(hydroxymethyl)pyrazine-2-carboxamide	75.11	Clc1cc(NC(=O)c2c(CO)nccn2)ccc1	11	0.47	1.02	0.92
omega_6270	-9.64896	-11.7157	0.36715	4.26965	4.45709	-2.96892	-4.05821	4		DC	4	2	C612-1068	5	N-(3-ethylphenyl)-3-(hydroxymethyl)pyrazine-2-carboxamide	75.11	O=C(Nc1cc(CC)ccc1)c1c(CO)nccn1	1	0.49	1.29	0.22
omega_103336	-9.64812	-12.1552	0.447527	4.82961	4.2647	-4.15963	-2.87517	3	CL8250	DC	3	2	D433-1486	6	6-benzyl-5-methyl-2-{[(4-methylphenyl)amino]methyl}[1,2,4]triazolo[1,5-a]pyrimidin-7(4H)-one	71.84	O=C1C(Cc2ccccc2)=C(C)Nc2n1nc(CNc1ccc(C)cc1)n2	199	1.06	3.42	-1.57
omega_103314	-9.64414	-13.1963	0.419512	5.12708	4.5242	-3.92397	-2.59462	3	CL8250	DC	3	2	D433-1463	6	2-(anilinomethyl)-6-benzyl-5-methyl[1,2,4]triazolo[1,5-a]pyrimidin-7(4H)-one	71.84	O=C1C(Cc2ccccc2)=C(C)Nc2n1nc(CNc1ccccc1)n2	109	1.42	2.94	-1
omega_22639	-9.64185	-11.614	0.667534	4.24761	4.56388	-4.43039	-3.07651	6	CV0299	DC	5	2	C720-0596	7	2-hydroxy-N-(4-methoxybenzyl)-8-methyl-4-oxo-4H-pyrido[1,2-a]pyrimidine-3-carboxamide	91.23	O=C(NCc1ccc(OC)cc1)C=1C(=O)N2C(=NC=1O)C=C(C)C=C2	26	0.8	1.25	-1.92
omega_124378	-9.63878	-9.98735	0.510128	4.12601	5.86656	-5.53798	-4.61616	6	CM0132	DC	7	3	D668-0096	9	methyl 2-{[(2-hydroxy-6-oxo-1,6-dihydropyrimidin-5-yl)sulfonyl]amino}benzoate	142.54	S(=O)(=O)(Nc1c(C(=O)OC)cccc1)C=1C(=O)NC(O)=NC=1	141	0.25	-0.651	-2.7
omega_1500210	-9.62899	-12.2756	0.412007	3.97249	4.14441	-3.42993	-2.45238	5	CM0615	NC	3	3	P574-1366	6	2-(2-amino-4-ethyl-6-oxopyrimidin-1(6H)-yl)-N-(2-methylphenyl)acetamide	87.79	O=C(Nc1c(C)cccc1)CN1C(N)=NC(CC)=CC1=O	100	1.26	1.827	1.32
omega_14933	-9.62734	-14.3527	0.494063	5.65453	4.89966	-3.54762	-2.77528	6	CL3447	DC	8	1	C679-2671	7	2-({[2-(2-furyl)-5-oxo-5H-[1,3,4]thiadiazolo[3,2-a]pyrimidin-7-yl]methyl}thio)benzoic acid	146.07	S(CC=1N=C2SC(c3occc3)=NN2C(=O)C=1)c1c(C(=O)O)cccc1	57	-2.08	2.86	-0.28
omega_356600	-9.62614	-11.8591	0.492739	4.70679	2.62753	-1.9548	-3.63929	5		DC	5	3	0657-0187	5	3-hydroxy-N'-[(E)-1-(2-hydroxy-1-naphthyl)methylidene]-2-naphthohydrazide	81.92	O=C(N/N=C/c1c(O)ccc2c1cccc2)c1c(O)cc2c(c1)cccc2	6	5.24	5.41	-7.17
omega_87203	-9.62529	-12.9648	0.489114	5.49123	4.20279	-4.04227	-2.80137	4	CL7372	DC	3	2	D351-0467	6	2-(3-methylphenyl)-5-{[(3-methylphenyl)amino]methyl}[1,2,4]triazolo[1,5-a]pyrimidin-7(4H)-one	71.84	O=C1n2nc(-c3cc(C)ccc3)nc2NC(CNc2cc(C)ccc2)=C1	139	1.17	3.32	-2.59
omega_22636	-9.62376	-10.3141	0.747218	4.15688	4.1053	-4.43663	-3.88242	4	CV0299	DC	4	2	C720-0592	6	N-cycloheptyl-2-hydroxy-8-methyl-4-oxo-4H-pyrido[1,2-a]pyrimidine-3-carboxamide	82	O=C(NC1CCCCCC1)C=1C(=O)N2C(=NC=1O)C=C(C)C=C2	66	1.77	2	-2.57
omega_320156	-9.62282	-12.2449	0.575578	4.75991	2.99905	-4.28541	-1.42705	4	CL2518	DC	4	1	G586-0048	3	N-(4-fluorobenzyl)-6-methylthieno[2,3-b]quinoline-2-carboxamide	70.23	Fc1ccc(CNC(=O)c2sc3nc4c(cc(C)cc4)cc3c2)cc1	101	4.49	5.02	-5.12
omega_671748	-9.62076	-14.0865	0.374915	5.99619	3.47676	-2.5992	-2.78287	5	CL4737	DC	2	2	C301-1989	4	3-(1H-benzimidazol-2-yl)-N-2-naphthylpropanamide	57.78	O=C(Nc1cc2c(cc1)cccc2)CCc1[nH]c2c(n1)cccc2	2	4.66	3.51	-3.77
omega_6213	-9.61831	-11.6079	0.356899	4.59625	5.0431	-4.36353	-3.6431	3	CL1273	DC	6	2	C612-0847	6	3-[(3-chloroanilino)carbonyl]-2-pyrazinecarboxylic acid	92.18	Clc1cc(NC(=O)c2c(C(=O)O)nccn2)ccc1	2	-0.84	2.31	0.22
omega_945824	-9.61817	-9.59691	0.599579	4.33315	3.87081	-5.31503	-3.50976	3		DC	6	2	8019-0080	6	N-[(9-ethyl-9H-carbazol-3-yl)methyl]-N-(2H-1,2,3,4-tetraazol-5-yl)amine	71.42	N(Cc1cc2c(n(CC)c3c2cccc3)cc1)c1n[nH]nn1	31	1.53	3.25	-4.47
omega_22484	-9.61589	-11.1293	0.576399	4.12507	3.85589	-4.62143	-2.42252	4	CL3531	DC	4	1	C720-0151	5	N-(4-fluorobenzyl)-8-methyl-4-oxo-4H-pyrido[1,2-a]pyrimidine-3-carboxamide	61.77	Fc1ccc(CNC(=O)C=2C(=O)N3C(=NC=2)C=C(C)C=C3)cc1	4	2.5	1.06	-2.64
omega_611453	-9.61407	-13.3067	0.523417	5.82781	3.29426	-2.34529	-3.60755	3		DC	6	2	8018-4646	6	N-(4-chlorophenyl)-2-(2,3-dihydro-1H-indol-1-yl)-6-oxo-1,4,5,6-tetrahydro-4-pyrimidinecarboxamide	73.8	Clc1ccc(NC(=O)C2N=C(N3c4c(cccc4)CC3)NC(=O)C2)cc1	48	2.43	2.43	-4.52
omega_22487	-9.6113	-11.8401	0.544164	4.49231	3.86255	-4.25663	-2.41357	4	CL3531	DC	3	1	C720-0154	5	8-methyl-N-(4-methylbenzyl)-4-oxo-4H-pyrido[1,2-a]pyrimidine-3-carboxamide	61.77	O=C(NCc1ccc(C)cc1)C=1C(=O)N2C(=NC=1)C=C(C)C=C2	5	3.3	1.34	-3.17
omega_611753	-9.61052	-10.9091	0.319806	4.01187	4.43803	-3.5253	-3.94585	5		DC	6	2	8018-5170F	6	N-(4-methoxybenzyl)-N-[2-(1H-1,2,3,4-tetraazol-5-yl)phenyl]amine	75.72	O(C)c1ccc(CNc2c(-c3[nH]nnn3)cccc2)cc1	6	0.048	1.83	-3.48
omega_1500215	-9.60716	-12.5168	0.48228	4.50211	3.51983	-3.05152	-2.54308	6	CM0615	NC	3	3	P574-1373	6	2-(2-amino-4-ethyl-6-oxopyrimidin-1(6H)-yl)-N-(3-ethylphenyl)acetamide	87.79	O=C(Nc1cc(CC)ccc1)CN1C(N)=NC(CC)=CC1=O	58	3.012	2.283	0.52
omega_1475732	-9.60518	-11.9695	0.418892	4.03402	5.05739	-5.89834	-1.24762	4	CM0005	NC	9	0	M876-1308	7	2-(5-{[5-(3,5-difluorophenyl)-1,3,4-oxadiazol-2-yl]methyl}-1,2,4-oxadiazol-3-yl)pyridine	90.73	Fc1cc(F)cc(-c2oc(Cc3onc(-c4ncccc4)n3)nn2)c1	3	0.391	2.575	-1.7
omega_113307	-9.60263	-13.5074	0.458138	5.86217	4.21074	-3.61612	-3.01013	5	CL7372	DC	1	4	D489-0195	6	2-(3,4-dimethylphenyl)-5-{[(2-ethylphenyl)amino]methyl}[1,2,4]triazolo[1,5-a]pyrimidin-7(4H)-one	71.84	O=C1n2nc(-c3cc(C)c(C)cc3)nc2NC(CNc2c(CC)cccc2)=C1	184	2.25	4.09	-2.7
omega_463287	-9.60182	-11.8753	0.352963	4.92822	2.74529	-1.94094	-3.81209	6		DC	5	3	4347-6805	5	N'-[(1E)-(5-chloro-2-hydroxyphenyl)methylene]-3-hydroxy-2-naphthohydrazide	81.92	Clc1cc(C=NNC(=O)c2c(O)cc3c(c2)cccc3)c(O)cc1	45	3.72	3.72	-1.95
omega_386085	-9.60003	-11.7046	0.484671	4.29843	3.12713	-3.04396	-2.7617	7		DC	6	2	2098-0223	6	N-(2-{2-[(E)-1-(4-bromophenyl)methylidene]hydrazino}-2-oxoethyl)-4-methyl-1-benzenesulfonamide	87.63	Brc1ccc(C=NNC(=O)CNO[SH0](=O)c2ccc(C)cc2)cc1	141	2.96	2.68	-5.21
omega_591611	-9.59474	-10.8131	0.361026	4.11043	2.96551	-3.23752	-2.98109	3		DC	5	4	8014-2091	5	5-amino-N~4~-[3-(trifluoromethyl)phenyl]-1H-pyrazole-4-carboxamide	83.8	FC(F)(F)c1cc(NC(=O)c2c(N)[nH]nc2)ccc1	31	0.82	0.82	-4.05
omega_6225	-9.59287	-11.397	0.301446	4.65224	4.58115	-3.65667	-4.07408	5		DC	4	2	C612-0910	5	3-(hydroxymethyl)-N-(4-methylphenyl)pyrazine-2-carboxamide	75.11	O=C(Nc1ccc(C)cc1)c1c(CO)nccn1	1	-0.13	0.84	0.61
omega_1500258	-9.59214	-12.4706	0.450797	4.58139	3.6182	-3.18804	-2.58389	5	CM0615	NC	4	3	P574-2336	6	2-[2-amino-4-ethyl-5-methyl-6-oxo-1(6H)-pyrimidinyl]-N-(2-fluorophenyl)acetamide	87.79	Fc1c(NC(=O)CN2C(=O)C(C)=C(CC)N=C2N)cccc1	116	2.059	2.099	0.75
omega_391322	-9.58958	-9.96907	0.420583	3.94779	5.58194	-5.77981	-3.79101	8		DC	5	3	2235-0048	7	2-hydroxy-N-(2-oxo-2-{2-[(E)-1-(2-pyridyl)methylidene]hydrazino}ethyl)benzamide	103.68	O=C(NN=Cc1ncccc1)CNC(=O)c1c(O)cccc1	4	0.4	1.31	0.54
omega_553055	-9.58916	-10.2386	0.5015	3.75888	6.99081	-6.88041	-3.72134	6		DC	9	2	8006-7090	9	N~1~-[4-(1,3-dioxo-1,3-dihydro-2H-isoindol-2-yl)-1-(2H-1,2,3,4-tetraazol-5-yl)butyl]acetamide	120.94	O=C(NC(CCCN1C(=O)c2c(C1=O)cccc2)c1n[nH]nn1)C	25	-0.94166	-1.07	-1.32548
omega_366333	-9.5861	-11.5468	0.395022	3.6865	3.97476	-3.8864	-2.20918	7		DC	5	2	1359-0038	6	2-bromo-N-(2-{2-[(E)-1-(2-furyl)methylidene]hydrazino}-2-oxoethyl)benzamide	83.7	Brc1c(C(=O)NCC(=O)NN=Cc2occc2)cccc1	31	2.73	1.89	-1.98
omega_87030	-9.58371	-13.8176	0.437847	5.80828	4.10068	-3.50546	-2.60745	2	CL7372	DC	3	2	D351-0037	6	5-{[(3-methylphenyl)amino]methyl}-2-phenyl[1,2,4]triazolo[1,5-a]pyrimidin-7(4H)-one	71.84	O=C1n2nc(-c3ccccc3)nc2NC(CNc2cc(C)ccc2)=C1	127	0.57	2.83	-2.36
omega_714583	-9.58318	-10.7777	0.486388	3.54733	3.95897	-4.4785	-2.31968	4	CL2813A	DC	5	1	G896-0181	6	N-[(5-methyl-2-furyl)methyl]-5-oxo-5H-[1,3]thiazolo[3,2-a]pyrimidine-6-carboxamide	100.21	O=C(NCc1oc(C)cc1)C=1C(=O)N2C(SC=C2)=NC=1	75	1.84	-0.04	-2.78
omega_87153	-9.58205	-14.3768	0.362161	5.78694	4.07756	-3.16927	-2.26263	5	CL7372	DC	3	2	D351-0325	6	2-(4-tert-butylphenyl)-5-{[(2-methylphenyl)amino]methyl}[1,2,4]triazolo[1,5-a]pyrimidin-7(4H)-one	71.84	O=C1n2nc(-c3ccc(C(C)(C)C)cc3)nc2NC(CNc2c(C)cccc2)=C1	211	2.4	4.23	-4.08
omega_22604	-9.57442	-10.6681	0.725658	4.4709	4.28837	-4.69163	-3.69961	7	CV0299	DC	4	2	C720-0549	6	2-hydroxy-9-methyl-4-oxo-N-(3-phenylpropyl)-4H-pyrido[1,2-a]pyrimidine-3-carboxamide	82	O=C(NCCCc1ccccc1)C=1C(=O)N2C(C(C)=CC=C2)=NC=1O	8	1.19	2.15	-1.55
omega_31288	-9.57229	-12.0235	0.621678	4.73784	3.8431	-4.4448	-2.30657	4		DC	4	1	C795-0731	5	N-(4-fluorobenzyl)-2-methyl-4-oxo-4H-pyrido[1,2-a]pyrimidine-3-carboxamide	61.77	Fc1ccc(CNC(=O)C=2C(=O)N3C(=NC=2C)C=CC=C3)cc1	1	2.24	1.13	-4.18
omega_191686	-9.56797	-13.8927	0.496053	5.8363	5.72268	-4.22282	-3.50745	3	CL5923	DC	7	2	F044-0015	7	2-(3-methylpiperidino)-2-oxo-N-[(4-oxo-3,4-dihydro-1-phthalazinyl)methyl]acetamide	90.87	O=C(NCC1=NNC(=O)c2c1cccc2)C(=O)N1CC(C)CCC1	1	1.45	1.45	-3.6
omega_586536	-9.56603	-10.0414	0.717476	4.807	5.80377	-5.08408	-5.7688	7		DC	7	4	8013-2797	7	2-[(2-phenylacetyl)amino]-4-phosphonobutanoic acid	133.74	P(=O)(O)(O)CCC(NC(=O)Cc1ccccc1)C(=O)O	31	-5.18	-0.34	-1.51
omega_22683	-9.56593	-10.3822	0.653725	4.41345	4.15243	-4.59748	-3.80587	4	CV0299	DC	4	2	C720-0650	6	N-cyclohexyl-2-hydroxy-4-oxo-4H-pyrido[1,2-a]pyrimidine-3-carboxamide	82	O=C(NC1CCCCC1)C=1C(=O)N2C(=NC=1O)C=CC=C2	43	0.38	1.1	-2.15
omega_627403	-9.56551	-12.6336	0.418868	4.72538	3.76717	-3.67907	-2.16422	2	CL2653	DC	6	1	8561-08412	5	5-methyl-6-(3-methylbenzyl)-2-(trifluoromethyl)[1,2,4]triazolo[1,5-a]pyrimidin-7(4H)-one	59.81	FC(F)(F)c1nn2C(=O)C(Cc3cc(C)ccc3)=C(C)Nc2n1	51	0.82	3.47	-2.03
omega_1028861	-9.56346	-10.4845	0.342388	4.66601	4.9264	-5.31538	-3.69838	4	CM4497	IC	7	2	S836-3534	7	(3S,4S)-4-(methoxymethyl)-N-methyl-1-(1H-pyrazol-4-ylcarbonyl)tetrahydro-1H-pyrrole-3-carboxamide	87.32	O=C(NC)[C@H]1[C@H](COC)CN(C(=O)c2c[nH]nc2)C1	3	-1.92	-1.92	35.27
omega_284955	-9.56337	-10.1358	0.518213	3.99515	4.60745	-5.40286	-3.14554	6	CL6481	DC	6	1	G205-0980	7	5-oxo-2-pyrrolidin-1-yl-N-(2-thien-2-ylethyl)-5H-[1,3,4]thiadiazolo[3,2-a]pyrimidine-6-carboxamide	130.91	O=C(NCCc1sccc1)C=1C(=O)N2N=C(N3CCCC3)SC2=NC=1	161	2.36	2.2	-2.53
omega_124348	-9.56298	-9.13528	0.314343	3.40248	5.25507	-5.37044	-4.02916	4	CM0132	DC	6	3	D668-0050	7	N-(2-fluorophenyl)-2-hydroxy-6-oxo-1,6-dihydropyrimidine-5-sulfonamide	116.24	S(=O)(=O)(Nc1c(F)cccc1)C=1C(=O)NC(O)=NC=1	139	-0.51	-0.301	-0.65
omega_381043	-9.56202	-12.3633	0.289454	4.70233	2.95128	-1.92567	-3.2161	6		DC	5	3	1986-3937	5	N'-[(E)-1-(5-bromo-2-hydroxyphenyl)methylidene]-1-hydroxy-2-naphthohydrazide	81.92	Brc1cc(C=NNC(=O)c2c(O)c3c(cc2)cccc3)c(O)cc1	64	3.23	3.81	-1.97
omega_800089	-9.56083	-9.90326	0.340347	3.39527	4.00422	-3.07928	-4.31813	5		DC	6	5	8017-0035	6	4-[(2-hydroxybenzyl)amino]-1H-pyrazole-3-carboxamide	104.03	O=C(N)c1c(NCc2c(O)cccc2)c[nH]n1	31	0.53	0.53	-2.97
omega_1472604	-9.55948	-12.5176	0.354661	5.171	1.71354	-2.30978	-1.97126	4	CL9905	NC	6	1	M769-1110	6	N-{2-[5-(3,5-dimethyl-1H-indol-2-yl)-1,2,4-oxadiazol-3-yl]ethyl}-N-methylacetamide	75.02	O=C(N(CCc1nc(-c2c(C)c3c([nH]2)ccc(C)c3)on1)C)C	1	2.4	2.4	-3.89
omega_124535	-9.55941	-11.864	0.464203	4.94512	5.04805	-4.31167	-3.84106	4	CM0132	DC	7	3	D668-0376	7	N-(3,4-difluorophenyl)-2-hydroxy-4-methyl-6-oxo-1,6-dihydropyrimidine-5-sulfonamide	116.24	S(=O)(=O)(Nc1cc(F)c(F)cc1)C1=C(C)N=C(O)NC1=O	196	-0.03	0.418	-1.49
omega_87053	-9.55846	-12.936	0.440922	5.36015	4.1051	-3.95829	-2.57037	4	CL7372	DC	4	2	D351-0081	6	5-(anilinomethyl)-2-(4-chlorophenyl)[1,2,4]triazolo[1,5-a]pyrimidin-7(4H)-one	71.84	Clc1ccc(-c2nn3C(=O)C=C(CNc4ccccc4)Nc3n2)cc1	103	2.24	3.01	-4.23
omega_113244	-9.55825	-12.7459	0.508913	5.20542	4.19116	-3.83412	-2.88372	5	CL7372	DC	4	2	D489-0115	6	5-{[(2-ethylphenyl)amino]methyl}-2-(4-fluorophenyl)[1,2,4]triazolo[1,5-a]pyrimidin-7(4H)-one	71.84	Fc1ccc(-c2nn3C(=O)C=C(CNc4ccc(C)cc4)Nc3n2)cc1	156	1.27	3.49	-1.67
omega_188831	-9.55473	-11.4143	0.534436	4.57139	3.89876	-5.04019	-2.10478	3	CL1643	DC	5	1	F018-1213	5	3-chloro-N-(4-fluorobenzyl)pyrazolo[1,5-a]pyrimidine-2-carboxamide	59.29	Clc1c(C(=O)NCc2ccc(F)cc2)nn2c1N=CC=C2	1	2.26	2.29	-3.72
omega_191685	-9.5544	-13.4232	0.473388	5.49571	5.43861	-3.78525	-3.75368	5	CL5923	DC	4	2	F044-0013	7	2-oxo-N-[(4-oxo-3,4-dihydrophthalazin-1-yl)methyl]-2-piperidin-1-ylacetamide	90.87	O=C(NCC1=NNC(=O)c2c1cccc2)C(=O)N1CCCCC1	17	0.26	0.37	1.52
omega_539150	-9.55252	-11.5146	0.334344	4.1435	3.43927	-2.40536	-3.54965	5		DC	6	3	8003-8699	6	2-{2-[(E)-1-(5-bromo-2-hydroxyphenyl)methylidene]hydrazino}-N-(2-methylphenyl)-2-oxoacetamide	90.79	Brc1cc(/C=N/NC(=O)C(=O)Nc2c(C)cccc2)c(O)cc1	29	3.57	3.83	-4.3
omega_87097	-9.55105	-13.4003	0.513852	5.83098	4.18038	-3.66462	-3.01138	3	CL7372	DC	3	2	D351-0158	6	5-{[(2-ethylphenyl)amino]methyl}-2-(4-methylphenyl)[1,2,4]triazolo[1,5-a]pyrimidin-7(4H)-one	71.84	O=C1n2nc(-c3ccc(C)cc3)nc2NC(CNc2c(CC)cccc2)=C1	199	3.33	3.77	-3.05
omega_624093	-9.54867	-9.68456	0.315866	3.49557	4.05792	-3.82527	-3.90819	4		DC	5	5	8020-5029	5	3-amino-4-(2-methoxybenzyl)-1H-pyrazol-5-ylamine	89.95	O(C)c1c(Cc2c(N)[nH]nc2N)cccc1	33	-0.53	-0.5	-2.57
omega_1240321	-9.54809	-12.6663	0.546286	5.40692	4.18144	-4.13246	-2.88398	4	CL7372	NC	4	2	D489-0106	6	5-{[(2,4-dimethylphenyl)amino]methyl}-2-(4-fluorophenyl)[1,2,4]triazolo[1,5-a]pyrimidin-7(4H)-one	81.07	Fc1ccc(-c2nn3C(=O)C=C(CNc4cc(OC)ccc4)Nc3n2)cc1	160	1.91	3.52	-1.82
omega_538858	-9.54638	-12.6016	0.264573	4.91345	2.93969	-1.85792	-3.20453	5		DC	5	3	8003-8161	5	3-hydroxy-N'-[(E)-1-(2-hydroxyphenyl)methylidene]-2-naphthohydrazide	81.92	O=C(N/N=C/c1c(O)cccc1)c1c(O)cc2c(c1)cccc2	26	4.13	4.23	-5.7
omega_1500219	-9.54459	-12.887	0.439118	4.25047	4.26703	-3.17674	-2.43748	6	CM0615	NC	4	3	P574-1381	7	2-(2-amino-4-ethyl-6-oxopyrimidin-1(6H)-yl)-N-(3-methoxyphenyl)acetamide	97.02	O=C(Nc1cc(OC)ccc1)CN1C(N)=NC(CC)=CC1=O	7	1.85	1.324	0.56
omega_87033	-9.543	-13.5271	0.571685	5.9708	4.19843	-3.94282	-2.81398	4	CL7372	DC	6	2	D351-0040	6	2-phenyl-5-({[2-(trifluoromethyl)phenyl]amino}methyl)[1,2,4]triazolo[1,5-a]pyrimidin-7(4H)-one	71.84	FC(F)(F)c1c(NCC=2Nc3n(C(=O)C=2)nc(-c2ccccc2)n3)cccc1	131	2.92	3.29	-2.59
omega_415238	-9.5422	-12.7878	0.386874	5.5438	2.32974	-2.00504	-3.00979	6		DC	4	2	3237-1540	5	N'~2~-[(E)-1-(2-hydroxy-1-naphthyl)methylidene]-6-methoxy-2-naphthohydrazide	70.92	O=C(N/N=C\c1c(O)ccc2c1cccc2)c1cc2c(cc(OC)cc2)cc1	1	3.81	4.22	-4.95
omega_240206	-9.53957	-12.1933	0.580258	5.13518	4.70107	-4.79981	-2.96294	5	CL7886	DC	5	1	F527-0025	6	2-methyl-N-[(5-oxo-2-phenyl-5H-[1,3,4]thiadiazolo[3,2-a]pyrimidin-7-yl)methyl]benzamide	99.43	O=C(NCC=1N=C2SC(c3ccccc3)=NN2C(=O)C=1)c1c(C)cccc1	1	1.69	3.57	-3.48
omega_366538	-9.53896	-12.1518	0.330881	5.05278	2.81907	-1.95818	-3.63173	6		DC	6	4	1416-0524	6	N'~2~-[(E)-1-(2,4-dihydroxyphenyl)methylidene]-3-hydroxy-2-naphthohydrazide	102.15	O=C(N/N=C/c1c(O)cc(O)cc1)c1c(O)cc2c(c1)cccc2	1	2.6579	3.78	-3.3249
omega_1234053	-9.5355	-10.6224	0.516377	4.0564	3.74925	-4.0947	-3.14046	3	CL2813A	NC	4	1	D358-0133	5	N-cyclooctyl-5-oxo-5H-[1,3]thiazolo[3,2-a]pyrimidine-6-carboxamide	87.07	O=C(NC1CCCCCCC1)C=1C(=O)N2C(SC=C2)=NC=1	186	3.62	1.82	-2.85
omega_1500381	-9.5345	-12.2414	0.445974	4.44709	4.27254	-3.78891	-2.66974	6	CM0615	NC	4	3	P574-4661	7	2-[2-amino-4-(methoxymethyl)-6-oxo-1(6H)-pyrimidinyl]-N~1~-(3-methylphenyl)acetamide	97.02	O=C(Nc1cc(C)ccc1)CN1C(N)=NC(COC)=CC1=O	183	1.082	0.823	1.06
omega_916218	-9.53133	-14.6691	0.398946	5.78882	4.4703	-3.36487	-2.15542	5		DC	7	1	Y042-7090	7	3-(4-methoxyphenyl)-N-(3-methyl-4-oxo-3,4-dihydro-1,2,3-benzotriazin-6-yl)propanamide	83.36	O=C(Nc1cc2C(=O)N(C)N=Nc2cc1)CCc1ccc(OC)cc1	30	2.1	2.1	-3.93
omega_915684	-9.53109	-14.3462	0.773212	6.55147	4.08421	-2.76348	-3.8303	8		DC	7	1	Y042-5185	7	N-[2-(1H-indol-1-yl)ethyl]-2-(3-methoxypropyl)-1,3-dioxo-5-isoindolinecarboxamide	80.64	O=C(NCCn1c2c(cc1)cccc2)c1cc2C(=O)N(CCCOC)C(=O)c2cc1	30	3.29	3.29	-4.54
omega_87087	-9.52802	-13.3793	0.477574	5.56322	4.12235	-3.69154	-2.62029	2	CL7372	DC	4	2	D351-0143	6	5-{[(3-chlorophenyl)amino]methyl}-2-(4-methylphenyl)[1,2,4]triazolo[1,5-a]pyrimidin-7(4H)-one	71.84	Clc1cc(NCC=2Nc3n(C(=O)C=2)nc(-c2ccc(C)cc2)n3)ccc1	73	2.44	3.5	-2.37
omega_103369	-9.5275	-12.256	0.610009	4.96605	4.23794	-4.29859	-2.78694	3	CL8250	DC	3	2	D433-1536	6	5-methyl-6-(4-methylbenzyl)-2-{[(4-methylphenyl)amino]methyl}[1,2,4]triazolo[1,5-a]pyrimidin-7(4H)-one	71.84	O=C1C(Cc2ccc(C)cc2)=C(C)Nc2n1nc(CNc1ccc(C)cc1)n2	238	1.68	3.91	-1.89
omega_796740	-9.52662	-12.1376	0.28041	4.53967	5.15981	-3.84196	-3.52698	3		DC	6	2	8016-6026	6	3-[(3-fluoroanilino)carbonyl]-2-pyrazinecarboxylic acid	92.18	Fc1cc(NC(=O)c2c(C(=O)O)nccn2)ccc1	31	-2.86	0.29	-2.33
omega_22684	-9.52661	-10.4832	0.712011	4.50595	4.25701	-4.72529	-3.79312	4	CV0299	DC	4	2	C720-0654	6	N-cycloheptyl-2-hydroxy-4-oxo-4H-pyrido[1,2-a]pyrimidine-3-carboxamide	82	O=C(NC1CCCCCC1)C=1C(=O)N2C(=NC=1O)C=CC=C2	40	0.85	1.55	-1.32
omega_1500101	-9.52366	-11.7005	0.388777	4.00734	3.65785	-3.29618	-2.5809	4	CM0615	NC	3	3	P574-0882	6	2-(2-amino-4-methyl-6-oxopyrimidin-1(6H)-yl)-N-(4-methylphenyl)acetamide	87.79	O=C(Nc1ccc(C)cc1)CN1C(N)=NC(C)=CC1=O	77	1.404	1.303	1.14
omega_87131	-9.52341	-13.4846	0.494821	5.73805	4.63962	-3.93888	-2.97244	7	CL7372	DC	5	2	D351-0217	8	5-{[(2-ethoxyphenyl)amino]methyl}-2-(4-methoxyphenyl)[1,2,4]triazolo[1,5-a]pyrimidin-7(4H)-one	90.3	O(CC)c1c(NCC=2Nc3n(C(=O)C=2)nc(-c2ccc(OC)cc2)n3)cccc1	159	1.65	2.66	-1.97
omega_1234076	-9.52334	-11.3176	0.699963	4.43776	3.84934	-4.70218	-2.49062	4	CL2813A	NC	4	1	D358-0161	5	3-methyl-N-(4-methylbenzyl)-5-oxo-5H-[1,3]thiazolo[3,2-a]pyrimidine-6-carboxamide	87.07	O=C(NCc1ccc(C)cc1)C=1C(=O)N2C(C)=CSC2=NC=1	91	3.21	1.63	-3.79
omega_22632	-9.52136	-10.2441	0.587016	3.40839	4.98138	-4.5445	-3.70957	9	CV0299	DC	6	3	C720-0583	8	2-hydroxy-N-[2-(2-hydroxyethoxy)ethyl]-8-methyl-4-oxo-4H-pyrido[1,2-a]pyrimidine-3-carboxamide	111.46	O=C(NCCOCCO)C=1C(=O)N2C(=NC=1O)C=C(C)C=C2	30	-2.12	-0.99	-1.98
omega_41613	-9.51943	-13.5885	0.514358	5.94452	3.65127	-4.39508	-1.64606	6	CL4403A	DC	3	1	C999-0236	5	2-(5,7-dimethyl-2-phenylpyrazolo[1,5-a]pyrimidin-6-yl)-N-(4-methylbenzyl)acetamide	59.29	O=C(NCc1ccc(C)cc1)CC1=C(C)n2nc(-c3ccccc3)cc2N=C1C	276	5.67	4.19	-4.28
omega_1081471	-9.51849	-11.5385	0.348094	4.23586	2.71815	-3.60533	-1.67676	5	CM4373	IC	5	1	T161-0655	5	N-[2-(1-isopropyl-5-methyl-1H-imidazol-2-yl)ethyl]-2-pyridinecarboxamide	59.81	O=C(NCCc1n(C(C)C)c(C)cn1)c1ncccc1	39	1.01	1.6	-2.19
omega_1212234	-9.51807	-12.2119	0.444235	4.76952	3.07272	-3.64798	-1.9447	3		NC	5	1	8539-0852	5	(5-bromo-2-hydroxyphenyl)[2-(4-methylphenyl)pyrazolo[1,5-a]pyrimidin-6-yl]methanone	67.49	Brc1cc(C(=O)C2=Cn3nc(-c4ccc(C)cc4)cc3N=C2)c(O)cc1	60	5.18	4.81	-4.22
omega_106763	-9.51705	-13.5705	0.571472	5.53955	4.7844	-4.65289	-2.18906	2	CL6729A	DC	5	1	D458-0138	6	2-[5,7-dimethyl-2-(4-methylphenyl)[1,2,4]triazolo[1,5-a]pyrimidin-6-yl]-N-(2-fluorophenyl)acetamide	72.18	Fc1c(NC(=O)CC2=C(C)n3nc(-c4ccc(C)cc4)nc3N=C2C)cccc1	181	3.36	3.94	-5.51
omega_617855	-9.51537	-9.5559	0.293088	3.23031	5.50369	-5.39128	-3.59528	2		DC	9	1	8019-4728	9	5-(6-nitro-1,3-benzodioxol-5-yl)-2H-1,2,3,4-tetraazole	118.74	O=[N+]([O-])c1c(-c2n[nH]nn2)cc2OCOc2c1	58	0.83859	0.94	-1.18175
omega_6264	-9.51185	-11.662	0.421961	4.68834	5.04365	-4.15404	-3.84975	5	CL1273	DC	7	2	C612-1036	6	3-{[(2,5-dichlorophenyl)amino]carbonyl}pyrazine-2-carboxylic acid	92.18	Clc1c(NC(=O)c2c(C(=O)O)nccn2)cc(Cl)cc1	68	-1.6	2.1	1.15
omega_33287	-9.5118	-14.6693	0.605613	6.03746	4.05407	-3.33772	-2.20194	6	CL3585	DC	4	1	C803-0070	6	3-(4-methoxyphenyl)-N-(11-oxo-6,8,9,11-tetrahydro-7H-pyrido[2,1-b]quinazolin-2-yl)propanamide	71	O=C(Nc1cc2C(=O)N3C(=Nc2cc1)CCCC3)CCc1ccc(OC)cc1	136	1.86	3.01	-0.19
omega_22644	-9.51155	-10.5487	0.703875	3.81336	5.51319	-5.17869	-3.8146	5	CV0299	DC	5	2	C720-0602	7	2-hydroxy-8-methyl-4-oxo-N-(pyridin-2-ylmethyl)-4H-pyrido[1,2-a]pyrimidine-3-carboxamide	94.89	O=C(NCc1ncccc1)C=1C(=O)N2C(=NC=1O)C=C(C)C=C2	19	-0.64	0.33	-0.8
omega_1505204	-9.51089	-9.9533	0.702396	4.96652	4.36787	-5.21722	-4.37717	3	CL8338	NC	6	1	P666-0133	8	7-{[4-(2-chlorophenyl)piperazin-1-yl]sulfonyl}pyrrolo[1,2-d][1,2,4]triazin-1(2H)-one	95.39	Clc1c(N2CCN(S(=O)(=O)c3cn4c(C(=O)NN=C4)c3)CC2)cccc1	35	2.997	0.573	-2.87
omega_103343	-9.50923	-12.431	0.471357	5.77203	4.57978	-5.53734	-2.36407	2	CL8250	DC	4	1	D433-1501	6	5-methyl-6-(4-methylbenzyl)-2-(piperidin-1-ylmethyl)[1,2,4]triazolo[1,5-a]pyrimidin-7(4H)-one	63.05	O=C1C(Cc2ccc(C)cc2)=C(C)Nc2n1nc(CN1CCCCC1)n2	325	0.65	3.3	0.13
omega_1500103	-9.50773	-12.4455	0.424266	4.53156	3.73221	-3.18998	-2.5603	5	CM0615	NC	3	3	P574-0886	6	2-(2-amino-4-methyl-6-oxopyrimidin-1(6H)-yl)-N-(2-ethylphenyl)acetamide	87.79	O=C(Nc1c(CC)cccc1)CN1C(N)=NC(C)=CC1=O	71	1.505	1.759	1.24
omega_501272	-9.50698	-10.8403	0.378451	3.81129	3.79588	-3.756	-2.89629	5		DC	5	3	5911-0002	5	{3-[2-(methylamino)ethyl]-1H-indol-5-yl}methanesulfonic acid	90.57	S(=O)(=O)(O)Cc1cc2c(CCNC)c[nH]c2cc1	9	-3.46	-0.96	-1.1
omega_537779	-9.50592	-13.4084	0.347444	4.84266	3.34814	-2.18975	-2.44605	6		DC	5	2	8003-5748	5	2-{2-[(E)-1-(3,4-dichlorophenyl)methylidene]hydrazino}-N~1~-(2-naphthyl)-2-oxoacetamide	70.56	Clc1c(Cl)ccc(C=NNC(=O)C(=O)Nc2cc3c(cc2)cccc3)c1	31	4.21	4.19	-3.7
omega_431582	-9.50512	-12.1408	0.740656	4.88387	5.24641	-5.15677	-3.07851	3	CL1942	DC	4	2	3448-7393	7	1-Furan-2-ylmethyl-5-(1H-indol-3-ylmethylene)-pyrimidine-2,4,6-trione	95.41	O=C1N(Cc2occc2)C(=O)NC(=O)C1=Cc1c2c([nH]c1)cccc2	44	0.75	2.07	-1.23
omega_335201	-9.50327	-11.9992	0.384127	4.65644	4.79509	-4.13534	-3.20439	5	CL7215	DC	5	2	G751-1859	5	6-chloro-2-{[(5-propyl-4H-1,2,4-triazol-3-yl)thio]methyl}quinolin-4(1H)-one	95.97	Clc1cc2C(=O)C=C(CSc3[nH]c(CCC)nn3)Nc2cc1	73	1.96	3.14	-3.11
omega_713383	-9.49909	-14.6453	0.639334	5.41554	3.18995	-2.80531	-1.2933	2	CL2482A	DC	5	1	G881-0031	6	N-1-naphthyl-2-(4-oxopyrido[3',2':4,5]thieno[3,2-d]pyrimidin-3(4H)-yl)acetamide	102.9	O=C(Nc1c2c(ccc1)cccc2)CN1C(=O)c2sc3ncccc3c2N=C1	173	2.24	2.2	-2.73
omega_100612	-9.49856	-13.2693	0.431332	5.46962	4.94406	-4.11065	-2.96363	5	CL7638	DC	7	3	D412-0043	7	2-(benzylamino)-5-[(2,3-dimethylanilino)methyl][1,2,4]triazolo[1,5-a]pyrimidin-7(4H)-one	83.87	O=C1n2nc(NCc3ccccc3)nc2NC(CNc2c(C)c(C)ccc2)=C1	195	2.87	2.87	-4.85
omega_41636	-9.49754	-13.2427	0.534224	5.81257	3.89826	-4.47846	-2.02146	5	CL4403A	DC	3	1	C999-0263	5	2-(5,7-dimethyl-2-phenylpyrazolo[1,5-a]pyrimidin-6-yl)-N-phenylacetamide	59.29	O=C(Nc1ccccc1)CC1=C(C)n2nc(-c3ccccc3)cc2N=C1C	44	4.14	3.7	-5.79
omega_1500100	-9.49499	-11.9086	0.380538	4.21548	3.49607	-3.10608	-2.57237	4	CM0615	NC	3	3	P574-0881	6	2-(2-amino-4-methyl-6-oxopyrimidin-1(6H)-yl)-N-(3-methylphenyl)acetamide	87.79	O=C(Nc1cc(C)ccc1)CN1C(N)=NC(C)=CC1=O	86	1.372	1.303	1.05
omega_389610	-9.49309	-11.8147	0.350746	4.66999	3.69457	-4.22104	-2.17265	6		DC	3	2	2181-0037	5	2-(2-naphthylamino)-N'-[(E)-1-(2-pyridyl)methylidene]acetohydrazide	66.38	O=C(NN=Cc1ncccc1)CNc1cc2c(cc1)cccc2	8	2.42	2.81	-3.1
omega_284773	-9.48575	-9.632	0.490232	3.68061	4.59209	-5.49219	-3.1245	4	CL6481	DC	5	1	G205-0366	7	N-cyclopropyl-2-(4-methylpiperidin-1-yl)-5-oxo-5H-[1,3,4]thiadiazolo[3,2-a]pyrimidine-6-carboxamide	102.67	O=C(NC1CC1)C=1C(=O)N2N=C(N3CCC(C)CC3)SC2=NC=1	105	1.55	2.05	-2.27
omega_87089	-9.48409	-12.8546	0.50462	5.40309	4.19249	-3.95504	-2.77461	2	CL7372	DC	3	2	D351-0146	6	2-(4-methylphenyl)-5-{[(3-methylphenyl)amino]methyl}[1,2,4]triazolo[1,5-a]pyrimidin-7(4H)-one	71.84	O=C1n2nc(-c3ccc(C)cc3)nc2NC(CNc2cc(C)ccc2)=C1	153	1.19	3.32	-2.61
omega_90445	-9.48362	-11.2983	0.515142	4.20655	3.86679	-4.24298	-2.53085	4	CL2813A	DC	4	1	D358-0021	5	N-(4-methylbenzyl)-5-oxo-5H-[1,3]thiazolo[3,2-a]pyrimidine-6-carboxamide	87.07	O=C(NCc1ccc(C)cc1)C=1C(=O)N2C(SC=C2)=NC=1	182	3.02	1.12	-3.05
omega_124448	-9.48145	-10.9923	0.546883	4.73047	5.06327	-4.0922	-4.73756	4	CM0132	DC	6	3	D668-0255	7	N~5~-(3-bromophenyl)-2-hydroxy-4-methyl-6-oxo-1,6-dihydro-5-pyrimidinesulfonamide	116.24	Brc1cc(NS(=O)(=O)C2=C(C)N=C(O)NC2=O)ccc1	165	0.76	0.755	-2.14
omega_62072	-9.47856	-12.0743	0.605563	4.59354	4.91403	-4.21668	-3.30068	7	CL5013	DC	5	2	D205-0323	7	N-(6-benzyl-7-hydroxy-5-methyl[1,2,4]triazolo[1,5-a]pyrimidin-2-yl)-2-phenylacetamide	92.41	O=C(Nc1nn2C(O)=C(Cc3ccccc3)C(C)=Nc2n1)Cc1ccccc1	196	2.8	4.11	-1.28
omega_485353	-9.47745	-10.6967	0.557176	4.21971	4.83544	-3.74513	-4.64797	2	CL1146	DC	7	5	5176-4931	7	N-[2-(6,7-dimethyl-3-oxo-1,2,3,4-tetrahydro-2-quinoxalinyl)acetyl]urea	113.32	O=C(NC(=O)CC1C(=O)Nc2c(N1)cc(C)c(C)c2)N	2	0.75	0.76	-1.92
omega_1300123	-9.47702	-13.6306	0.48351	5.10783	4.18946	-4.18803	-1.4392	2	CL8429	NC	3	1	F937-1503	4	4-methyl-2-(4-methylphenyl)-N-(1-phenylethyl)pyrimidine-5-carboxamide	54.88	O=C(NC(C)c1ccccc1)c1c(C)nc(-c2ccc(C)cc2)nc1	1	2.71	3.61	-3.4
omega_585162	-9.47662	-12.9169	0.412989	5.43167	2.63728	-3.51072	-1.53089	3		DC	4	1	8013-1159	3	2,6-dichloro-N~3~-(2,5-dimethylphenyl)-4-methylnicotinamide	41.99	Clc1c(C(=O)Nc2c(C)ccc(C)c2)c(C)cc(Cl)n1	47	3.71	4.67	-3.73
omega_946386	-9.47543	-9.67239	0.539603	4.17419	4.17509	-5.01755	-3.67437	1		DC	5	2	8019-6435	5	6-chloro-1-(1H-1,2,3,4-tetraazol-5-yl)-2,3,4,9-tetrahydro-1H-carbazole	70.25	Clc1cc2c([nH]c3C(c4[nH]nnn4)CCCc23)cc1	6	2.04	3.8	-4.97
omega_1447489	-9.47489	-13.4506	0.41519	6.17783	2.99905	-3.71849	-1.89787	5	CL9387	NC	4	1	M056-0999	4	N-(3-chloro-2-methylphenyl)-1-methyl-5-[4-methyl-5-(pyrrolidin-1-ylcarbonyl)-1,3-thiazol-2-yl]-1H-pyrrole-3-sulfonamide	72.22	Brc1ccc(CNC(=O)Cn2c3c(c(SCC)ncc3)cc2)cc1	26	3.81	3.445	3.18
omega_525533	-9.47384	-12.9845	0.442149	4.68756	4.2953	-3.88169	-2.03267	4	CL0166	DC	4	2	7418-0269	5	N-[3-(1H-benzimidazol-2-yl)-4-chlorophenyl]nicotinamide	70.67	Clc1c(-c2[nH]c3c(n2)cccc3)cc(NC(=O)c2cnccc2)cc1	121	4.17	3.57	-5.58
omega_536422	-9.47284	-12.691	0.247058	4.4699	2.91813	-2.44688	-1.97004	6		DC	3	2	8003-3085	5	N~1~-(2,6-dimethylphenyl)-2-{2-[(E)-1-(4-methylphenyl)methylidene]hydrazino}-2-oxoacetamide	70.56	O=C(NN=Cc1ccc(C)cc1)C(=O)Nc1c(C)cccc1C	31	2.37	3.41	-1.7
omega_87066	-9.47091	-13.4454	0.504127	5.90484	4.17166	-3.56069	-3.04542	5	CL7372	DC	4	2	D351-0104	6	2-(4-chlorophenyl)-5-{[(2-ethylphenyl)amino]methyl}[1,2,4]triazolo[1,5-a]pyrimidin-7(4H)-one	71.84	Clc1ccc(-c2nn3C(=O)C=C(CNc4c(CC)cccc4)Nc3n2)cc1	129	3.11	3.95	-2.4
omega_564062	-9.46972	-11.5637	0.271291	4.21313	2.33149	-2.14771	-2.57427	3		DC	3	2	8009-0179	3	N~1~-cyclooctyl-2-hydroxybenzamide	49.33	O=C(NC1CCCCCCC1)c1c(O)cccc1	15	3.81	3.86	-2.92
omega_124362	-9.46781	-8.97884	0.466281	3.50745	5.58795	-5.63758	-4.41307	5	CM0132	DC	6	3	D668-0080	8	2-hydroxy-N-(2-methoxyphenyl)-6-oxo-1,6-dihydropyrimidine-5-sulfonamide	125.47	S(=O)(=O)(Nc1c(OC)cccc1)C=1C(=O)NC(O)=NC=1	197	-0.67	-0.523	-0.25
omega_82852	-9.46772	-11.574	0.621843	5.16018	6.86733	-6.52958	-4.01344	9	CL2171	DC	3	4	D340-1310	7	N~4~-[2-(1H-indol-3-yl)ethyl]-N~5~-propyl-1H-imidazole-4,5-dicarboxamide	102.67	O=C(NCCC)c1c(C(=O)NCCc2c3c([nH]c2)cccc3)nc[nH]1	210	1.58	1.37	-1.81
omega_284924	-9.46669	-10.6788	0.510781	4.4973	4.23175	-4.92672	-3.10104	5	CL6481	DC	5	1	G205-0846	7	N-(4-ethylphenyl)-5-oxo-2-pyrrolidin-1-yl-5H-[1,3,4]thiadiazolo[3,2-a]pyrimidine-6-carboxamide	102.67	O=C(Nc1ccc(CC)cc1)C=1C(=O)N2N=C(N3CCCC3)SC2=NC=1	102	2.65	3.37	-2.9
omega_1528650	-9.46478	-14.3764	0.445939	5.78383	4.92504	-4.03818	-2.20496	4	CL2352A	NC	1	1	Z223-0029	7	N~1~-(2-chlorobenzyl)-2-[4-(1-pyrrolidinyl)-1H-pyrazolo[3,4-d]pyrimidin-1-yl]acetamide	75.94	Clc1c(CNC(=O)Cn2ncc3c(N4CCCC4)ncnc23)cccc1	11	3.173	1.703	-2.74
omega_376440	-9.46375	-12.2141	0.479997	4.34969	2.18072	-2.85953	-1.40051	5		DC	6	1	1761-1970	9	N'-[(1E)-1-naphthylmethylene]-2-(3-nitro-1H-1,2,4-triazol-1-yl)acetohydrazide	117.99	O=[N+]([O-])c1nn(CC(=O)NN=Cc2c3c(ccc2)cccc3)cn1	21	1.81	1.82	-1.79
omega_277650	-9.46368	-12.0904	0.580452	5.1738	2.76649	-3.71038	-2.18361	6	CL5886	DC	4	0	G020-0248	5	6-benzyl-2-ethyl-5-(propylthio)-2,6-dihydro-7H-pyrazolo[4,3-d]pyrimidin-7-one	75.79	S(CCC)C=1N(Cc2ccccc2)C(=O)c2nn(CC)cc2N=1	37	4.32	3.56	-5.7
omega_914672	-9.46258	-13.3028	0.62828	5.50259	4.35512	-2.78107	-3.86468	8		DC	8	2	Y042-3619	8	N-[2-(1H-imidazol-4-yl)ethyl]-2-(3-methoxypropyl)-1,3-dioxo-5-isoindolinecarboxamide	104.39	O=C(NCCc1nc[nH]c1)c1cc2C(=O)N(CCCOC)C(=O)c2cc1	30	-0.0239	0.32	-2.86
omega_725903	-9.46243	-8.54437	0.340557	3.61223	5.06149	-5.80976	-4.12257	4	CL8033	DC	5	2	J032-0100	6	N-{[5-(3-chloro-4-methylphenyl)-2-furyl]methyl}-2H-tetrazol-5-amine	79.63	Clc1c(C)ccc(-c2oc(CNc3n[nH]nn3)cc2)c1	107	3.18	3.46	-1.81
omega_22714	-9.46182	-10.6604	0.743773	3.93174	4.92687	-4.65941	-3.74436	9	CV0299	DC	5	2	C720-0688	7	N-{2-[butyl(methyl)amino]ethyl}-2-hydroxy-4-oxo-4H-pyrido[1,2-a]pyrimidine-3-carboxamide	85.24	O=C(NCCN(CCCC)C)C=1C(=O)N2C(=NC=1O)C=CC=C2	96	-0.16	0.7	-0.43
omega_87140	-9.46002	-14.1894	0.399727	5.5891	4.75835	-3.27974	-2.73802	6	CL7372	DC	4	2	D351-0304	7	2-(4-tert-butylphenyl)-5-{[(2-methoxyphenyl)amino]methyl}[1,2,4]triazolo[1,5-a]pyrimidin-7(4H)-one	81.07	O(C)c1c(NCC=2Nc3n(C(=O)C=2)nc(-c2ccc(C(C)(C)C)cc2)n3)cccc1	190	3.3	3.73	2.93
omega_22679	-9.45981	-9.13102	0.636818	3.32602	4.88866	-4.48137	-4.69892	7	CV0299	DC	5	3	C720-0643	7	2-hydroxy-N-[1-(hydroxymethyl)propyl]-4-oxo-4H-pyrido[1,2-a]pyrimidine-3-carboxamide	102.23	O=C(NC(CO)CC)C=1C(=O)N2C(=NC=1O)C=CC=C2	15	-0.86	-0.4	-1.98
omega_800091	-9.45965	-8.37752	0.416677	4.07817	4.1976	-4.50009	-5.27448	4		DC	5	3	8017-0037	5	2-[(1H-1,2,3-benzotriazol-4-ylamino)methyl]phenol	73.83	Oc1c(CNc2c3nn[nH]c3ccc2)cccc1	31	2.16	2.16	-2.42
omega_610849	-9.45817	-10.6142	0.531406	3.99052	5.8799	-4.99253	-4.25326	4		DC	6	2	8018-3711	6	5-({[(3-methyl-2-quinoxalinyl)methyl]sulfanyl}methyl)-2,4-dihydro-3H-1,2,4-triazol-3-one	104.57	S(Cc1c(C)nc2c(n1)cccc2)CC1=NNC(=O)N1	32	0.64727	1.26	0.96449
omega_103353	-9.45766	-12.3212	0.589459	4.89463	4.2088	-4.05019	-2.7792	3	CL8250	DC	4	2	D433-1520	6	2-{[(2-chlorophenyl)amino]methyl}-5-methyl-6-(4-methylbenzyl)[1,2,4]triazolo[1,5-a]pyrimidin-7(4H)-one	71.84	Clc1c(NCc2nn3C(=O)C(Cc4ccc(C)cc4)=C(C)Nc3n2)cccc1	268	3.35	4.09	-3.93
omega_124444	-9.45726	-11.4298	0.453837	5.1628	4.95636	-4.27537	-4.3251	4	CM0132	DC	6	3	D668-0251	7	N~5~-(2-chlorophenyl)-2-hydroxy-4-methyl-6-oxo-1,6-dihydro-5-pyrimidinesulfonamide	116.24	Clc1c(NS(=O)(=O)C2=C(C)N=C(O)NC2=O)cccc1	183	0.46	0.671	-0.94
omega_22653	-9.45412	-11.5455	0.791625	4.31358	4.86705	-4.42083	-3.46002	7	CV0299	DC	5	2	C720-0612	7	2-hydroxy-N-[2-(3-methoxyphenyl)ethyl]-8-methyl-4-oxo-4H-pyrido[1,2-a]pyrimidine-3-carboxamide	91.23	O=C(NCCc1cc(OC)ccc1)C=1C(=O)N2C(=NC=1O)C=C(C)C=C2	6	0.99	1.57	-2.05
omega_103318	-9.45405	-12.4756	0.47416	4.95369	4.45658	-4.13222	-2.73063	4	CL8250	DC	4	2	D433-1467	7	6-benzyl-2-{[(2-methoxyphenyl)amino]methyl}-5-methyl[1,2,4]triazolo[1,5-a]pyrimidin-7(4H)-one	81.07	O(C)c1c(NCc2nn3C(=O)C(Cc4ccccc4)=C(C)Nc3n2)cccc1	251	1.28	2.92	-2.81
omega_957333	-9.45294	-11.0601	0.500513	4.22783	4.22255	-5.26072	-2.08304	4	CM3124	IC	7	3	CM3124-0175	7	2-(1H-indol-3-yl)-N-[1-(6-oxo-1,6-dihydro-3-pyridazinyl)-4-piperidyl]acetamide	89.59	O=C(NC1CCN(C2=NNC(=O)C=C2)CC1)Cc1c2c([nH]c1)cccc2	2	1.11	1.11	-3.72
omega_685311	-9.45058	-14.2843	0.995852	5.19874	4.70043	-3.35388	-2.7074	7	CL2560	DC	4	2	C385-0673	7	N-benzyl-6-{[(3,5-dimethylphenyl)amino]sulfonyl}-N-methyl-4-oxo-1,4-dihydroquinoline-3-carboxamide	95.58	S(=O)([O-])(=Nc1cc(C)cc(C)c1)c1cc2C(=O)C(C(=O)N(Cc3ccccc3)C)=CNc2cc1	189	5.48	3.35	-5.85
omega_124335	-9.45036	-9.00312	0.311841	3.25287	5.24923	-5.55642	-3.70477	4	CM0132	DC	5	3	D668-0035	7	2-hydroxy-6-oxo-N-phenyl-1,6-dihydropyrimidine-5-sulfonamide	116.24	S(=O)(=O)(Nc1ccccc1)C=1C(=O)NC(O)=NC=1	164	-0.55	-0.507	-1.27
omega_90566	-9.44971	-11.1225	0.766355	4.22757	3.78142	-4.7435	-2.35908	4	CL2813A	DC	4	1	D358-0301	5	2,3-dimethyl-N-(4-methylbenzyl)-5-oxo-5H-[1,3]thiazolo[3,2-a]pyrimidine-6-carboxamide	87.07	O=C(NCc1ccc(C)cc1)C=1C(=O)N2C(C)=C(C)SC2=NC=1	197	3.67	2.15	-4.02
omega_519903	-9.44851	-12.0971	0.507047	4.52844	3.26092	-2.99188	-2.65594	4	CL1059	DC	4	1	6834-0353	6	6-{[(2-methoxyphenyl)amino]methyl}-5H-pyrrolo[3,4-b]pyridine-5,7(6H)-dione	71.53	O(C)c1c(NCN2C(=O)c3ncccc3C2=O)cccc1	136	-0.44	1.81	-0.19
omega_874287	-9.44713	-10.1022	0.362588	4.25863	4.00383	-4.49306	-3.47687	4		DC	5	3	Y021-2121	5	4-(3,4-dimethoxyphenyl)-1H-pyrazol-5-amine	73.16	O(C)c1c(OC)ccc(-c2c(N)[nH]nc2)c1	60	0.35	0.35	-2.62
omega_22635	-9.44489	-10.4755	0.705115	4.37556	4.11966	-4.34155	-3.82818	4	CV0299	DC	4	2	C720-0588	6	N-cyclohexyl-2-hydroxy-8-methyl-4-oxo-4H-pyrido[1,2-a]pyrimidine-3-carboxamide	82	O=C(NC1CCCCC1)C=1C(=O)N2C(=NC=1O)C=C(C)C=C2	58	0.86	1.54	-1.33
omega_1212206	-9.44478	-12.4548	0.444986	5.00376	3.07157	-3.63144	-1.87887	3		NC	5	1	8539-0730	5	(5-chloro-2-hydroxyphenyl)(2-phenylpyrazolo[1,5-a]pyrimidin-6-yl)methanone	67.49	Clc1cc(C(=O)C2=Cn3nc(-c4ccccc4)cc3N=C2)c(O)cc1	41	3.65	4.24	-4.01
omega_1342826	-9.44284	-11.0912	0.592943	3.86429	3.87345	-4.36817	-2.31417	4	CL2813A	NC	5	1	G896-0149	5	N-(4-fluorobenzyl)-5-oxo-5H-[1,3]thiazolo[3,2-a]pyrimidine-6-carboxamide	87.07	Fc1ccc(CNC(=O)C=2C(=O)N3C(SC=C3)=NC=2)cc1	8	2.05	0.84	-3.92
omega_870978	-9.44278	-9.31343	0.721668	4.74882	5.41175	-5.78707	-5.22453	0		DC	8	6	Y020-7791	8	3-amino-4-[(E)-2-(3-methyl-4-phenyl-1H-pyrazol-5-yl)-1-diazenyl]-1H-pyrazol-5-ylamine	134.12	N(=N/c1c(c(C)n[nH]1)-c1ccccc1)\c1c(N)[nH]nc1N	26	0.2	0.2	-5.02
omega_6222	-9.4424	-11.6264	0.339146	4.57409	4.98713	-4.22183	-3.49453	5		DC	6	2	C612-0891	6	3-(hydroxymethyl)-N-(2-methoxyphenyl)-2-pyrazinecarboxamide	84.34	O=C(Nc1c(OC)cccc1)c1c(CO)nccn1	3	2	2	1.93
omega_87127	-9.43648	-13.3353	0.534082	5.8338	4.14605	-3.77327	-2.84186	6	CL7372	DC	4	2	D351-0213	7	5-{[(2-ethylphenyl)amino]methyl}-2-(4-methoxyphenyl)[1,2,4]triazolo[1,5-a]pyrimidin-7(4H)-one	81.07	O(C)c1ccc(-c2nn3C(=O)C=C(CNc4c(CC)cccc4)Nc3n2)cc1	148	1.91	3.27	-3.61
omega_945834	-9.43403	-12.1727	0.245408	4.85236	2.15561	-2.16761	-2.34707	3		DC	3	1	8019-0153	3	2-(4-fluorophenethyl)-2,3-dihydro-4H-1,3-benzoxazin-4-one	38.33	Fc1ccc(CCC2Oc3c(C(=O)N2)cccc3)cc1	31	3.96	3.96	-4.77
omega_1500399	-9.43235	-12.3977	0.464511	4.37314	3.88714	-3.1746	-2.58483	6	CM0615	NC	5	3	P574-4688	7	2-[2-amino-4-(methoxymethyl)-6-oxo-1(6H)-pyrimidinyl]-N~1~-(3-chlorophenyl)acetamide	97.02	Clc1cc(NC(=O)CN2C(N)=NC(COC)=CC2=O)ccc1	128	1.265	1.001	-0.71
omega_415223	-9.43112	-12.8051	0.38946	5.41908	2.33699	-2.18361	-2.58791	6		DC	5	2	3237-1488	5	N'-[(1E)-(3-hydroxy-1-benzothien-2-yl)methylene]-6-methoxy-2-naphthohydrazide	70.92	O=C(NN=Cc1c(O)c2c(s1)cccc2)c1cc2c(cc(OC)cc2)cc1	43	3.15	4.93	-4.24
omega_103349	-9.4309	-12.5343	0.614716	5.00724	4.45433	-4.23093	-2.74193	4	CL8250	DC	5	2	D433-1516	7	2-{[(5-chloro-2-methoxyphenyl)amino]methyl}-5-methyl-6-(4-methylbenzyl)[1,2,4]triazolo[1,5-a]pyrimidin-7(4H)-one	81.07	Clc1cc(NCc2nn3C(=O)C(Cc4ccc(C)cc4)=C(C)Nc3n2)c(OC)cc1	252	2.85	4.07	-3.36
omega_911016	-9.42998	-11.8011	0.609426	5.16667	4.39515	-5.02662	-2.7735	5		DC	7	1	Y041-6725	7	5-bromo-N-[2-(2-pyridyl)ethyl]-2-(1H-1,2,3,4-tetraazol-1-yl)benzamide	85.59	Brc1cc(C(=O)NCCc2ncccc2)c(-n2nnnc2)cc1	46	1.01	1.01	-3.06
omega_124453	-9.42996	-10.1895	0.377385	4.28271	5.21187	-5.14491	-3.96754	4	CM0132	DC	7	3	D668-0264	7	N-(2,5-dichlorophenyl)-2-hydroxy-4-methyl-6-oxo-1,6-dihydropyrimidine-5-sulfonamide	116.24	Clc1c(NS(=O)(=O)C2=C(C)N=C(O)NC2=O)cc(Cl)cc1	189	1	1.336	-1.1
omega_87025	-9.42896	-12.6274	0.503766	5.13752	4.46908	-4.06892	-2.84299	3	CL7372	DC	4	2	D351-0030	7	5-{[(2-methoxyphenyl)amino]methyl}-2-phenyl[1,2,4]triazolo[1,5-a]pyrimidin-7(4H)-one	81.07	O(C)c1c(NCC=2Nc3n(C(=O)C=2)nc(-c2ccccc2)n3)cccc1	99	1.07	2.33	-2.15
omega_500277	-9.426	-8.76061	0.545791	3.86073	5.73227	-6.30222	-4.50196	2	CL1526	DC	6	2	5830-0597	6	5-(4-methoxyanilino)-6-methyl-1,2,4-triazin-3(2H)-one	75.08	O(C)c1ccc(NC=2C(C)=NNC(=O)N=2)cc1	2	1.06	1.06	-2.47
omega_1500099	-9.42308	-11.45	0.352545	3.91725	4.07948	-3.64649	-2.67581	4	CM0615	NC	3	3	P574-0880	6	2-(2-amino-4-methyl-6-oxopyrimidin-1(6H)-yl)-N-(2-methylphenyl)acetamide	87.79	O=C(Nc1c(C)cccc1)CN1C(N)=NC(C)=CC1=O	86	0.939	1.303	2.4
omega_62079	-9.42225	-11.5153	0.441788	4.6066	4.82744	-4.21764	-3.56517	7	CL5013	DC	6	2	D205-0330	8	N-(6-benzyl-7-hydroxy-5-methyl[1,2,4]triazolo[1,5-a]pyrimidin-2-yl)-4-methoxybenzamide	101.64	O=C(Nc1nn2C(O)=C(Cc3ccccc3)C(C)=Nc2n1)c1ccc(OC)cc1	193	1.54	4.06	-3.03
omega_569184	-9.41386	-12.3222	0.457594	4.6674	2.99905	-3.88389	-1.33178	4		DC	5	1	8009-8758	3	2,6-dichloro-N~3~-(4-chlorobenzyl)-4-methylnicotinamide	41.99	Clc1c(C(=O)NCc2ccc(Cl)cc2)c(C)cc(Cl)n1	35	4.59	4.37	-5.09
omega_869281	-9.41224	-13.4785	0.723177	5.36825	3.21464	-3.04889	-2.19089	1		DC	5	1	Y020-5404	5	N-1-naphthalenyl-4-oxo-4H-[1,3]thiazino[3,2-a]benzimidazole-2-carboxamide	89.29	O=C(Nc1c2c(ccc1)cccc2)C=1Sc2n(C(=O)C=1)c1c(n2)cccc1	47	4.08	4.08	-5.76
omega_566351	-9.41113	-11.714	0.314752	4.15779	3.92398	-3.87968	-2.21399	2	CL4994	DC	4	2	8009-3807	5	7-Benzyl-2-chloro-7H-purin-6-ylamine	69.62	Clc1nc(N)c2n(Cc3ccccc3)cnc2n1	40	1.7	2.46	-2.17
omega_1500211	-9.4093	-12.025	0.466256	4.22864	3.69262	-3.19273	-2.57907	5	CM0615	NC	3	3	P574-1367	6	2-(2-amino-4-ethyl-6-oxopyrimidin-1(6H)-yl)-N-(3-methylphenyl)acetamide	87.79	O=C(Nc1cc(C)ccc1)CN1C(N)=NC(CC)=CC1=O	84	2.042	1.827	0.98
omega_950512	-9.40872	-12.1297	0.441276	4.36859	5.40568	-3.52419	-3.97038	3	CL1273	DC	7	2	C612-0835	7	3-[(2-cyanoanilino)carbonyl]-2-pyrazinecarboxylic acid	115.97	O=C(O)c1c(C(=O)Nc2c(C#N)cccc2)nccn1	1	-2.87	0.28	-2.59
omega_6206	-9.40543	-11.6809	0.394204	4.53901	4.85634	-3.29094	-4.22312	4		DC	6	2	C612-0824	6	N-(5-chloro-2-methoxyphenyl)-3-(hydroxymethyl)pyrazine-2-carboxamide	84.34	Clc1cc(NC(=O)c2c(CO)nccn2)c(OC)cc1	244	-0.04	1	0.65
omega_1500382	-9.4045	-12.0381	0.470997	3.93923	4.2928	-3.54134	-2.52814	6	CM0615	NC	4	3	P574-4662	7	2-[2-amino-4-(methoxymethyl)-6-oxo-1(6H)-pyrimidinyl]-N~1~-(4-methylphenyl)acetamide	97.02	O=C(Nc1ccc(C)cc1)CN1C(N)=NC(COC)=CC1=O	116	1.118	0.823	1.14
omega_100616	-9.40172	-14.0523	0.301339	5.48146	4.88044	-3.20018	-2.81247	5	CL7638	DC	7	3	D412-0047	7	2-(benzylamino)-5-(2-toluidinomethyl)[1,2,4]triazolo[1,5-a]pyrimidin-7(4H)-one	83.87	O=C1n2nc(NCc3ccccc3)nc2NC(CNc2c(C)cccc2)=C1	145	2.45	2.45	-4.6
omega_733965	-9.40022	-11.569	0.523502	4.31905	2.20436	-3.10341	-1.77475	4		DC	6	2	K072-0239	5	nicotinaldehyde (5,7-dichloro-8-hydroxyquinolin-2-yl)hydrazone	70.4	Clc1c(O)c2nc(NN=Cc3cnccc3)ccc2c(Cl)c1	1	2.29	3.642	-0.65
omega_87213	-9.3992	-14.1373	0.510491	5.85396	4.08392	-3.41441	-2.29586	5	CL7372	DC	3	2	D351-0479	6	5-{[(2-ethylphenyl)amino]methyl}-2-(3-methylphenyl)[1,2,4]triazolo[1,5-a]pyrimidin-7(4H)-one	71.84	O=C1n2nc(-c3cc(C)ccc3)nc2NC(CNc2c(CC)cccc2)=C1	129	2.49	3.77	-2.21
omega_398467	-9.39895	-10.8905	0.407729	4.84385	4.93068	-5.19843	-3.49224	5		DC	4	2	2423-4084	6	4-methyl-3-phenyl-N'~5~-[(E)-1-(2-pyridyl)methylidene]-1H-pyrazole-5-carbohydrazide	83.03	O=C(N/N=C/c1ncccc1)c1c(C)c(-c2ccccc2)n[nH]1	4	2.51	3.69	-1.16
omega_1475719	-9.39869	-12.2378	0.379539	4.15832	4.95815	-5.45308	-1.20387	4	CM0005	NC	7	0	M876-1280	7	2-(3-chlorophenyl)-5-{[3-(2-pyridyl)-1,2,4-oxadiazol-5-yl]methyl}-1,3,4-oxadiazole	90.73	Clc1cc(-c2oc(Cc3onc(-c4ncccc4)n3)nn2)ccc1	2	2.26	2.26	-3.96
omega_1393837	-9.39712	-13.1788	0.455683	4.92874	2.58698	-2.83052	-1.35917	4	CL8573	NC	2	1	L454-0070	3	N-cyclopentyl-3-(piperidin-1-ylcarbonyl)-1,2-benzisoxazole-5-sulfonamide	41.99	O=C(Nc1c(C)cc(C)cc1)c1cnc(-c2cc(C)ccc2)cc1	17	4.11	4.87	-5.51
omega_106916	-9.3967	-13.7709	0.588134	5.82978	4.78662	-4.67679	-2.15352	3	CL6729A	DC	5	1	D458-0354	6	2-[5,7-dimethyl-2-(3-methylphenyl)[1,2,4]triazolo[1,5-a]pyrimidin-6-yl]-N-(2-fluorophenyl)acetamide	72.18	Fc1c(NC(=O)CC2=C(C)n3nc(-c4cc(C)ccc4)nc3N=C2C)cccc1	182	3.35	3.94	-5.52
omega_22634	-9.39538	-9.97844	0.623722	4.10093	4.17044	-4.62348	-3.68855	4	CV0299	DC	4	2	C720-0587	6	N-cyclopentyl-2-hydroxy-8-methyl-4-oxo-4H-pyrido[1,2-a]pyrimidine-3-carboxamide	82	O=C(NC1CCCC1)C=1C(=O)N2C(=NC=1O)C=C(C)C=C2	21	0.4	1.09	-4.4
omega_87152	-9.39499	-13.5989	0.552443	6.06173	4.15352	-3.6688	-2.89492	6	CL7372	DC	3	2	D351-0323	6	2-(4-tert-butylphenyl)-5-{[(2-ethylphenyl)amino]methyl}[1,2,4]triazolo[1,5-a]pyrimidin-7(4H)-one	71.84	O=C1n2nc(-c3ccc(C(C)(C)C)cc3)nc2NC(CNc2c(CC)cccc2)=C1	208	2.73	4.69	-4.05
omega_103379	-9.39446	-12.5026	0.500433	5.12332	4.31987	-4.07267	-2.76278	3	CL8250	DC	5	2	D433-1568	6	6-(4-chlorobenzyl)-2-{[(4-fluorophenyl)amino]methyl}-5-methyl[1,2,4]triazolo[1,5-a]pyrimidin-7(4H)-one	71.84	Clc1ccc(CC=2C(=O)n3nc(CNc4ccc(F)cc4)nc3NC=2C)cc1	246	2.89	3.81	-2.54
omega_277526	-9.39381	-11.9262	0.716283	5.05888	4.12193	-4.41664	-2.94808	6	CL5886	DC	6	2	G020-0068	7	2-{[6-(4-chlorobenzyl)-2-ethyl-7-oxo-6,7-dihydro-2H-pyrazolo[4,3-d]pyrimidin-5-yl]thio}acetamide	118.88	Clc1ccc(CN2C(SCC(=O)N)=Nc3c(C2=O)nn(CC)c3)cc1	98	2.3	2.21	-2.42
omega_732413	-9.39323	-12.7949	0.321839	4.79838	2.57655	-1.10157	-3.19354	6		DC	5	4	K007-0243	5	1-(2,3,4-trihydroxyphenyl)-1-ethanone 1-(4-fluorophenyl)hydrazone	85.08	Fc1ccc(N/N=C(/C)\c2c(O)c(O)c(O)cc2)cc1	2	2.82	2.91	-2.89
omega_1147409	-9.39306	-12.5193	0.43294	5.46158	3.62855	-3.47636	-2.92045	6	CL2726	DC	5	1	V019-0753	5	1-(4-isopropylphenyl)-5-oxo-N~3~-[2-(2-pyridyl)ethyl]-3-pyrrolidinecarboxamide	62.3	O=C(NCCc1ncccc1)C1CN(c2ccc(C(C)C)cc2)C(=O)C1	7	4.02	4.02	-3.82
omega_87117	-9.39251	-12.6434	0.499422	5.32096	4.14917	-3.91986	-2.79883	5	CL7372	DC	5	2	D351-0198	7	5-{[(3-chlorophenyl)amino]methyl}-2-(4-methoxyphenyl)[1,2,4]triazolo[1,5-a]pyrimidin-7(4H)-one	81.07	Clc1cc(NCC=2Nc3n(C(=O)C=2)nc(-c2ccc(OC)cc2)n3)ccc1	129	2.15	2.99	-3.56
omega_612605	-9.39021	-8.00676	0.138752	1.50196	5.18059	-4.39878	-3.80596	3		DC	10	4	8018-6392	10	N'-hydroxy-4-(2H-1,2,3,4-tetraazol-5-yl)-1,2,5-oxadiazole-3-carboximidamide	151.99	O/N=C(\N)/c1c(-c2n[nH]nn2)non1	48	-1.78	0.22	-3.55
omega_1500124	-9.38771	-11.372	0.410624	3.96542	3.68446	-3.42068	-2.65549	4	CM0615	NC	4	3	P574-0939	6	2-(2-amino-4-methyl-6-oxopyrimidin-1(6H)-yl)-N-(4-chlorophenyl)acetamide	87.79	Clc1ccc(NC(=O)CN2C(N)=NC(C)=CC2=O)cc1	4	1.166	1.481	0.74
omega_1330543	-9.38759	-13.0217	0.772551	5.42455	4.68153	-4.0823	-3.1622	6	CL2674	NC	4	2	G731-0079	5	N-mesityl-2-[(5-phenyl-4H-1,2,4-triazol-3-yl)thio]acetamide	95.97	S(CC(=O)Nc1c(C)cc(C)cc1C)c1[nH]c(-c2ccccc2)nn1	217	3.88	4.3	-4.76
omega_390639	-9.38678	-11.8818	0.280558	3.41816	2.70661	-2.19248	-1.7178	3	CL4276	DC	5	1	2198-4022	7	1-Methyl-4-nitro-1H-pyrazole-3-carboxylic acid (3-bromo-phenyl)-amide	92.74	Brc1cc(NC(=O)c2c([N+](=O)[O-])cn(C)n2)ccc1	2	1.36	1.78	-3.3
omega_714592	-9.38293	-11.0994	0.644626	4.10832	3.83344	-4.49849	-2.37147	5	CL2813A	DC	4	1	G896-0281	6	N-[4-(dimethylamino)benzyl]-5-oxo-5H-[1,3]thiazolo[3,2-a]pyrimidine-6-carboxamide	90.31	O=C(NCc1ccc(N(C)C)cc1)C=1C(=O)N2C(SC=C2)=NC=1	45	2.38	0.8	-0.86
omega_155358	-9.38035	-13.5235	0.490393	5.1726	3.57376	-3.11682	-1.97678	1	CL4837	DC	6	1	E559-0221	6	N-(5-fluoro-2-methylphenyl)-7-methyl-5-oxo-5H-[1,3]thiazolo[3,2-a]pyrimidine-6-sulfonamide	112.52	S(=O)(=O)(Nc1c(C)ccc(F)c1)C=1C(=O)N2C(SC=C2)=NC=1C	3	0.72	1.28	-2.41
omega_22703	-9.37928	-10.4056	0.80832	3.74309	4.52761	-4.52886	-3.52388	7	CV0299	DC	5	2	C720-0675	8	2-hydroxy-4-oxo-N-[3-(2-oxopyrrolidin-1-yl)propyl]-4H-pyrido[1,2-a]pyrimidine-3-carboxamide	102.31	O=C(NCCCN1C(=O)CCC1)C=1C(=O)N2C(=NC=1O)C=CC=C2	12	-0.77	-1.05	0.23
omega_1505555	-9.37918	-13.8427	0.459152	4.89997	3.54891	-3.81481	-0.629713	6	CM0906	NC	6	0	P668-0005	6	5-(3-methoxybenzyl)-3-[(5-methyl-2-phenyl-1,3-oxazol-4-yl)methyl]-1,2,4-oxadiazole	74.18	O(C)c1cc(Cc2onc(Cc3c(C)oc(-c4ccccc4)n3)n2)ccc1	116	4.605	3.595	-6.41
omega_1330585	-9.37409	-13.7903	0.343476	5.09805	4.09896	-2.55309	-2.5712	6	CL2674	NC	5	2	G731-0222	5	2-{[5-(2-chlorophenyl)-4H-1,2,4-triazol-3-yl]thio}-N-mesitylacetamide	95.97	Clc1c(-c2[nH]c(SCC(=O)Nc3c(C)cc(C)cc3C)nn2)cccc1	278	4.68	4.96	-7.07
omega_799656	-9.3724	-10.473	0.474448	4.65154	4.65653	-4.72565	-3.95627	3		DC	7	3	8016-9412	7	2-{[(4,6-dihydroxy-2-pyrimidinyl)sulfanyl]methyl}-4(3H)-quinazolinone	133	S(CC1=Nc2c(C(=O)N1)cccc2)c1nc(O)cc(O)n1	31	-3.25	-0.15	-2.54
omega_15083	-9.36936	-12.8341	0.507579	5.51191	4.54206	-4.22975	-2.86711	5	CL3446	DC	6	1	C679-3934	7	N-{2-[(2-methyl-5-oxo-5H-[1,3,4]thiadiazolo[3,2-a]pyrimidin-7-yl)methoxy]phenyl}acetamide	108.66	O=C(Nc1c(OCC=2N=C3SC(C)=NN3C(=O)C=2)cccc1)C	125	0.65	1.31	-1.95
omega_124347	-9.3687	-9.19505	0.386688	3.71884	5.28483	-5.03106	-4.53295	4	CM0132	DC	5	3	D668-0049	7	2-hydroxy-N-1-naphthyl-6-oxo-1,6-dihydropyrimidine-5-sulfonamide	116.24	S(=O)(=O)(Nc1c2c(ccc1)cccc2)C=1C(=O)NC(O)=NC=1	141	0.15	0.402	-2.09
omega_551732	-9.36853	-11.0381	0.661452	4.49552	7.18575	-6.02621	-4.64694	2	CL0963	DC	8	3	8006-4312	8	6-methyl-2,4-dioxo-N-(3-quinolyl)-1,2,3,4-tetrahydro-5-pyrimidinesulfonamide	125.64	S(=O)(=O)(Nc1cnc2c(c1)cccc2)C=1C(=O)NC(=O)NC=1C	33	-1.33	0.3	-3.08
omega_700105	-9.36368	-8.35604	0.364983	3.62285	4.2288	-5.10281	-4.12147	2	CL1526	DC	5	2	G856-0725	5	5-(benzylamino)-6-methyl-1,2,4-triazin-3(2H)-one	65.85	O=C1N=C(NCc2ccccc2)C(C)=NN1	130	1.31	1.31	-2.55
omega_334958	-9.36176	-13.1029	0.476456	5.44853	4.79845	-3.89628	-3.08605	4	CL7215	DC	4	2	G751-0003	5	2-{[(5-phenyl-4H-1,2,4-triazol-3-yl)thio]methyl}quinolin-4(1H)-one	95.97	S(CC=1Nc2c(C(=O)C=1)cccc2)c1[nH]c(-c2ccccc2)nn1	3	2.3	3.01	-3.34
omega_285051	-9.36108	-10.1263	0.646102	4.32898	4.6016	-5.67461	-3.1369	8	CL6481	DC	5	1	G205-2027	7	2-(diethylamino)-5-oxo-N-(2-phenylethyl)-5H-[1,3,4]thiadiazolo[3,2-a]pyrimidine-6-carboxamide	102.67	O=C(NCCc1ccccc1)C=1C(=O)N2N=C(N(CC)CC)SC2=NC=1	76	2.26	3	-1.73
omega_22667	-9.36104	-10.3638	0.806226	4.06138	4.70993	-4.90304	-3.67177	9	CV0299	DC	5	2	C720-0629	7	N-{2-[butyl(methyl)amino]ethyl}-2-hydroxy-8-methyl-4-oxo-4H-pyrido[1,2-a]pyrimidine-3-carboxamide	85.24	O=C(NCCN(CCCC)C)C=1C(=O)N2C(=NC=1O)C=C(C)C=C2	48	0.45	1.15	-0.6
omega_863448	-9.35886	-10.29	0.325243	3.5594	2.89285	-3.61624	-2.23013	2		DC	5	0	Y010-0155	5	6-benzyl[1,2,3]thiadiazolo[5,4-d]pyrimidin-7(6H)-one	86.69	O=C1N(Cc2ccccc2)C=Nc2snnc12	3	1.53207	2.66	-4.2231
omega_1500218	-9.35541	-11.7328	0.478539	4.12235	4.0656	-3.5753	-2.71383	5	CM0615	NC	3	3	P574-1377	6	2-(2-amino-4-ethyl-6-oxopyrimidin-1(6H)-yl)-N-(2,4-dimethylphenyl)acetamide	87.79	O=C(Nc1c(C)cc(C)cc1)CN1C(N)=NC(CC)=CC1=O	114	1.746	2.313	0.92
omega_169498	-9.35248	-11.9553	0.348226	5.17347	2.23271	-1.10906	-4.04248	6	CL5182	DC	4	3	E742-0073	4	5-(hydroxymethyl)-2-methyl-4-(2-toluidinomethyl)-3-pyridinol	65.38	OCc1c(CNc2c(C)cccc2)c(O)c(C)nc1	2	0.061	0.32	-1.53
omega_495920	-9.35012	-12.3544	0.406732	4.91093	2.89181	-3.19276	-2.01241	3	CL4729	DC	3	1	5638-0266	4	6-benzyl-2-(4-chlorophenyl)-5-methylpyrazolo[1,5-a]pyrimidin-7(4H)-one	46.92	Clc1ccc(-c2nn3C(=O)C(Cc4ccccc4)=C(C)Nc3c2)cc1	1	3.57	4.81	-5.17
omega_62067	-9.34851	-10.9068	0.490861	4.28553	4.86029	-4.25129	-3.82714	6	CL5013	DC	5	2	D205-0318	7	N-(6-benzyl-7-hydroxy-5-methyl[1,2,4]triazolo[1,5-a]pyrimidin-2-yl)propanamide	92.41	O=C(Nc1nn2C(O)=C(Cc3ccccc3)C(C)=Nc2n1)CC	218	0.41	3.08	-2.14
omega_341780	-9.348	-12.8436	0.62464	5.59788	4.91986	-4.06974	-3.57703	5	CL5923	DC	5	2	G786-2291	6	5-chloro-2-methoxy-N-[(4-oxo-3,4-dihydrophthalazin-1-yl)methyl]benzamide	79.79	Clc1cc(C(=O)NCC2=NNC(=O)c3c2cccc3)c(OC)cc1	27	2.44	2.21	-3.49
omega_579831	-9.34684	-11.2773	0.205884	4.43284	2.62677	-2.49805	-2.83697	4		DC	3	2	8012-4494	3	3-(4-isobutylphenyl)-1H-pyrazol-5-ol	48.91	Oc1[nH]nc(-c2ccc(CC(C)C)cc2)c1	21	4.06	4.16	-4.05
omega_511098	-9.34596	-11.9342	0.516116	4.34793	5.59071	-3.87466	-3.99181	4		DC	6	3	6266-1832	8	6-[(Z)-2-(1H-indol-3-yl)vinyl]-5-nitropyrimidine-2,4-diol	127.85	O=[N+]([O-])c1c(O)nc(O)nc1C=Cc1c2c([nH]c1)cccc2	1	0.18	2.52	-1.01
omega_62075	-9.34498	-11.4303	0.452569	4.44166	4.83441	-4.33616	-3.30717	6	CL5013	DC	5	2	D205-0326	7	N-(6-benzyl-7-hydroxy-5-methyl[1,2,4]triazolo[1,5-a]pyrimidin-2-yl)benzamide	92.41	O=C(Nc1nn2C(O)=C(Cc3ccccc3)C(C)=Nc2n1)c1ccccc1	156	1.4	4.08	-4.46
omega_87129	-9.34224	-12.5214	0.466047	5.40245	4.22018	-4.08947	-2.82006	5	CL7372	DC	4	2	D351-0215	7	2-(4-methoxyphenyl)-5-{[(2-methylphenyl)amino]methyl}[1,2,4]triazolo[1,5-a]pyrimidin-7(4H)-one	81.07	O(C)c1ccc(-c2nn3C(=O)C=C(CNc4c(C)cccc4)Nc3n2)cc1	122	1.54	2.81	-2.56
omega_6265	-9.34186	-12.9213	0.452078	4.79176	5.06876	-3.55915	-3.17404	5	CL1273	DC	8	2	C612-1042	6	3-({[3-(trifluoromethyl)phenyl]amino}carbonyl)pyrazine-2-carboxylic acid	92.18	FC(F)(F)c1cc(NC(=O)c2c(C(=O)O)nccn2)ccc1	1	-0.74	1.72	1.09
omega_103335	-9.33909	-12.9576	0.591296	5.16283	4.4922	-4.02961	-2.59819	4	CL8250	DC	3	2	D433-1485	6	6-benzyl-2-{[(2-ethylphenyl)amino]methyl}-5-methyl[1,2,4]triazolo[1,5-a]pyrimidin-7(4H)-one	71.84	O=C1C(Cc2ccccc2)=C(C)Nc2n1nc(CNc1c(CC)cccc1)n2	199	3.28	3.88	-1.41
omega_1500225	-9.33839	-11.6415	0.474554	3.88807	3.71626	-3.22143	-2.55429	5	CM0615	NC	4	3	P574-1415	6	2-[2-amino-4-ethyl-6-oxo-1(6H)-pyrimidinyl]-N~1~-(4-fluorophenyl)acetamide	87.79	Fc1ccc(NC(=O)CN2C(N)=NC(CC)=CC2=O)cc1	26	2.003	1.546	-0.21
omega_626931	-9.33493	-11.8586	0.476765	4.34803	3.68261	-3.95696	-2.02672	4	CL2653	DC	4	1	8525-0610	5	6-(4-chlorobenzyl)-5-methyl-2-propyl[1,2,4]triazolo[1,5-a]pyrimidin-7(4H)-one	59.81	Clc1ccc(CC=2C(=O)n3nc(CCC)nc3NC=2C)cc1	10	2.1	3.68	-1.47
omega_210395	-9.33481	-14.0426	0.452983	6.0044	3.90437	-3.58254	-2.07137	8	CL7676	DC	4	2	F259-0202	5	3-phenyl-N-[2-(propionylamino)-1,3-benzothiazol-6-yl]propanamide	99.33	O=C(Nc1cc2sc(NC(=O)CC)nc2cc1)CCc1ccccc1	9	3.97	3.85	-3.54
omega_167950	-9.33435	-10.7658	0.828561	4.52609	4.46132	-4.41371	-3.97077	8	CL5254	DC	7	3	E726-0279	7	ethyl 4-amino-2-({2-[(4-fluoro-2-methylphenyl)amino]-2-oxoethyl}thio)pyrimidine-5-carboxylate	132.5	S(CC(=O)Nc1c(C)cc(F)cc1)c1nc(N)c(C(=O)OCC)cn1	90	3.04	2.44	-2.58
omega_923863	-9.33217	-9.84597	0.338549	3.84069	4.49055	-5.2052	-2.95079	3		DC	4	2	Y070-0062	4	5-[(2,4-dichlorophenoxy)methyl]-2,4-dihydro-3H-1,2,4-triazole-3-thione	77.74	Clc1c(OCC2=NNC(=S)N2)ccc(Cl)c1	1	2.14	2.24	-3.63
omega_22656	-9.33137	-9.65751	0.597284	3.5937	4.53002	-4.83933	-3.55553	6	CV0299	DC	5	2	C720-0616	7	N-[2-(dimethylamino)ethyl]-2-hydroxy-8-methyl-4-oxo-4H-pyrido[1,2-a]pyrimidine-3-carboxamide	85.24	O=C(NCCN(C)C)C=1C(=O)N2C(=NC=1O)C=C(C)C=C2	19	-1.37	-0.18	-0.12
omega_554126	-9.33029	-13.3698	0.657169	5.61124	2.36855	-1.32999	-3.26746	5		DC	5	2	8006-9285	4	4,5-dichloro-2-[(1-naphthylamino)carbonyl]benzoic acid	66.4	Clc1c(Cl)cc(C(=O)Nc2c3c(ccc2)cccc3)c(C(=O)O)c1	2	1.9	4.46	-1.83
omega_1500227	-9.3296	-11.7391	0.48577	3.94014	3.78763	-3.22765	-2.57641	5	CM0615	NC	4	3	P574-1422	6	2-(2-amino-4-ethyl-6-oxopyrimidin-1(6H)-yl)-N-(4-chlorophenyl)acetamide	87.79	Clc1ccc(NC(=O)CN2C(N)=NC(CC)=CC2=O)cc1	98	2.003	2.005	0.92
omega_210396	-9.32802	-13.7737	0.56692	6.15442	3.85425	-3.69621	-2.43364	7	CL7676	DC	4	2	F259-0203	5	N-[2-(acetylamino)-1,3-benzothiazol-6-yl]-3-phenylpropanamide	99.33	O=C(Nc1cc2sc(NC(=O)C)nc2cc1)CCc1ccccc1	2	3.08	3.18	-3.75
omega_1012599	-9.32674	-12.9647	0.293989	5.731	1.51087	-2.34314	-1.55473	4	CM4363	IC	6	0	S694-1477	6	4-(5-methyl-1-{1-[(1-methyl-1H-pyrazol-4-yl)methyl]tetrahydro-1H-pyrrol-3-yl}-1H-imidazol-2-yl)pyridine	51.77	C(N1CC(n2c(-c3ccncc3)ncc2C)CC1)c1cn(C)nc1	23	-1.06	-0.0121	-2.35
omega_1004637	-9.3266	-10.2297	0.38893	4.0441	3.89644	-4.18335	-3.24299	2	CM4193	IC	5	1	S636-0279	5	7-(3,4,5-trifluorobenzyl)-2,5,6,7,8,9-hexahydro-3H-[1,2,4]triazolo[4,3-d][1,4]diazepin-3-one	47.94	Fc1c(F)cc(CN2CCN3C(=O)NN=C3CC2)cc1F	4	0.58	0.66	-2.37
omega_87142	-9.3244	-14.0694	0.358343	5.74622	4.07342	-3.16734	-2.26563	5	CL7372	DC	4	2	D351-0306	6	2-(4-tert-butylphenyl)-5-{[(2-fluorophenyl)amino]methyl}[1,2,4]triazolo[1,5-a]pyrimidin-7(4H)-one	71.84	Fc1c(NCC=2Nc3n(C(=O)C=2)nc(-c2ccc(C(C)(C)C)cc2)n3)cccc1	194	2.86	3.95	-3.33
omega_947255	-9.32185	-8.77515	0.268628	3.48967	3.3016	-3.66681	-3.93979	3		DC	5	3	8020-2469	5	5-(anilinomethyl)-1,2-dihydro-3H-1,2,4-triazol-3-one	65.52	O=C1N=C(CNc2ccccc2)NN1	31	-0.11	-0.0999	-1.69
omega_389799	-9.32132	-11.7328	0.459113	4.71145	2.63734	-2.27492	-3.12148	7		DC	3	3	2181-1148	5	N'-[(E)-1-(2-hydroxyphenyl)ethylidene]-2-(1-naphthylamino)acetohydrazide	73.72	O=C(NN=C(C)c1c(O)cccc1)CNc1c2c(ccc1)cccc2	120	3.19	2.69	-2.69
omega_1500387	-9.32073	-12.0326	0.539892	4.18477	3.98782	-3.35192	-2.64869	6	CM0615	NC	4	3	P574-4669	7	2-[2-amino-4-(methoxymethyl)-6-oxo-1(6H)-pyrimidinyl]-N~1~-(2,4-dimethylphenyl)acetamide	97.02	O=C(Nc1c(C)cc(C)cc1)CN1C(N)=NC(COC)=CC1=O	197	0.975	1.31	0.78
omega_1212232	-9.31978	-12.4844	0.429487	4.89694	3.1028	-3.37002	-1.89457	3		NC	5	1	8539-0850	5	(5-bromo-2-hydroxyphenyl)(2-phenylpyrazolo[1,5-a]pyrimidin-6-yl)methanone	67.49	Brc1cc(C(=O)C2=Cn3nc(-c4ccccc4)cc3N=C2)c(O)cc1	72	4.85	4.33	-4.62
omega_124441	-9.31925	-10.4714	0.563127	4.67472	5.3101	-5.53812	-3.85767	4	CM0132	DC	5	3	D668-0247	7	2-hydroxy-4-methyl-N~5~-(1-naphthyl)-6-oxo-1,6-dihydro-5-pyrimidinesulfonamide	116.24	S(=O)(=O)(Nc1c2c(ccc1)cccc2)C1=C(C)N=C(O)NC1=O	169	0.62	0.915	-0.92
omega_113247	-9.31888	-12.9126	0.593066	5.46872	4.78244	-4.26564	-2.9849	6	CL7372	DC	5	2	D489-0119	6	5-{[(2-ethoxyphenyl)amino]methyl}-2-(4-fluorophenyl)[1,2,4]triazolo[1,5-a]pyrimidin-7(4H)-one	100.08	O=C1n2nc(-c3sccc3)nc2NC(CNc2ccccc2)=C1	173	1.84	2.88	-0.94
omega_415867	-9.31727	-9.3635	0.521009	3.16718	5.42692	-6.08724	-2.98164	6		DC	5	2	3253-0230	6	2-(1H-benzimidazol-2-ylthio)-N'-[(1E)-pyridin-2-ylmethylene]acetohydrazide	108.33	S(CC(=O)NN=Cc1ncccc1)c1[nH]c2c(n1)cccc2	143	1.83	2.97	-2.53
omega_107101	-9.31723	-13.3793	0.47335	4.97658	4.79749	-4.27325	-1.91214	4	CL6729A	DC	4	1	D458-0731	6	2-(5,7-dimethyl-2-propyl[1,2,4]triazolo[1,5-a]pyrimidin-6-yl)-N-(3-methylphenyl)acetamide	72.18	O=C(Nc1cc(C)ccc1)CC1=C(C)n2nc(CCC)nc2N=C1C	196	2.79	3.19	-3.84
omega_508644	-9.31563	-11.2013	0.530177	5.12248	4.66172	-4.03965	-4.38908	6		DC	5	5	6191-0635	7	4-[(5-hydroxy-3-methyl-1H-pyrazol-4-yl)(4-hydroxyphenyl)methyl]-3-methyl-1H-pyrazol-5-ol	118.05	Oc1c(C(c2c(O)[nH]nc2C)c2ccc(O)cc2)c(C)n[nH]1	40	1.44	1.99	-1.39
omega_1500325	-9.31507	-12.5649	0.523622	4.66369	3.79887	-3.19487	-2.54152	6	CM0615	NC	3	3	P574-4034	6	2-[2-amino-4-isopropyl-6-oxo-1(6H)-pyrimidinyl]-N~1~-(2-ethylphenyl)acetamide	87.79	O=C(Nc1c(CC)cccc1)CN1C(N)=NC(C(C)C)=CC1=O	257	2.703	2.602	-0.45
omega_295329	-9.31282	-12.405	0.24024	4.83875	2.72595	-2.34647	-2.36631	5	CL6876	DC	2	2	G328-0367	4	2-(3,5-dimethyl-1H-pyrazol-4-yl)-N-(4-methylbenzyl)acetamide	57.78	O=C(NCc1ccc(C)cc1)Cc1c(C)[nH]nc1C	1	3.35	2.01	-2.61
omega_6260	-9.31169	-11.4275	0.43017	4.63156	5.03151	-4.16089	-3.81655	4	CL1273	DC	5	2	C612-1020	6	3-{[(3-ethylphenyl)amino]carbonyl}pyrazine-2-carboxylic acid	92.18	O=C(O)c1c(C(=O)Nc2cc(CC)ccc2)nccn1	2	-2.41	1.72	1.31
omega_610141	-9.31129	-9.02424	0.286402	3.06315	5.57663	-4.33878	-4.87444	5		DC	7	5	8018-2826	7	4-[(3-pyridylmethyl)amino]-1H-pyrazole-5-carbohydrazide	108.72	O=C(NN)c1c(NCc2cnccc2)cn[nH]1	52	-3.6231	-1.51	3.5689
omega_913651	-9.3089	-13.3303	0.870485	6.2002	4.12674	-3.76644	-3.4096	7		DC	7	3	Y042-2069	7	3-(2,5-dioxo-1-phenyl-4-imidazolidinyl)-N-[2-(5-fluoro-1H-indol-3-yl)ethyl]propanamide	94.3	Fc1cc2c(CCNC(=O)CCC3C(=O)N(c4ccccc4)C(=O)N3)c[nH]c2cc1	30	1.57	1.72	-4.01
omega_800126	-9.30701	-7.97463	0.385076	3.65672	4.85564	-5.33306	-4.89675	2	CL1530	DC	6	4	8017-0086	6	5-amino-N~4~-(4-fluorophenyl)-2H-1,2,3-triazole-4-carboxamide	96.69	Fc1ccc(NC(=O)c2c(N)n[nH]n2)cc1	31	0.38	0.64	-2.33
omega_1500102	-9.30593	-11.6763	0.45469	4.19899	3.70916	-3.41733	-2.57511	4	CM0615	NC	3	3	P574-0883	6	2-[2-amino-4-methyl-6-oxo-1(6H)-pyrimidinyl]-N~1~-(3,4-dimethylphenyl)acetamide	87.79	O=C(Nc1cc(C)c(C)cc1)CN1C(N)=NC(C)=CC1=O	112	2.02	1.789	-1.34
omega_285088	-9.30501	-10.9218	0.547732	4.68187	4.64267	-5.2991	-2.95643	6	CL6481	DC	6	1	G205-2276	8	N-[2-(dimethylamino)ethyl]-2-(3-methylpiperidin-1-yl)-5-oxo-5H-[1,3,4]thiadiazolo[3,2-a]pyrimidine-6-carboxamide	105.91	O=C(NCCN(C)C)C=1C(=O)N2N=C(N3CC(C)CCC3)SC2=NC=1	17	0.31	1.77	1.49
omega_796739	-9.30471	-12.1779	0.517379	5.10255	4.96304	-4.46413	-3.24564	3		DC	6	2	8016-6025	6	3-{[4-(trifluoromethyl)anilino]carbonyl}-2-pyrazinecarboxylic acid	92.18	FC(F)(F)c1ccc(NC(=O)c2c(C(=O)O)nccn2)cc1	31	-1.67	1.48	-2.88
omega_952457	-9.30449	-13.8801	0.505456	5.83611	4.06655	-3.67621	-2.15629	5		DC	6	1	Y042-6161	6	3-(4-methoxyphenyl)-N~1~-(3-methyl-4-oxo-3,4-dihydro-6-quinazolinyl)propanamide	71	O=C(Nc1cc2C(=O)N(C)C=Nc2cc1)CCc1ccc(OC)cc1	30	3.17	3.17	-4.84
omega_124437	-9.30405	-13.5675	0.304054	4.60507	5.21857	-3.2278	-2.6364	4	CM0132	DC	5	3	D668-0243	7	N~5~-(3,5-dimethylphenyl)-2-hydroxy-4-methyl-6-oxo-1,6-dihydro-5-pyrimidinesulfonamide	116.24	S(=O)(=O)(Nc1cc(C)cc(C)c1)C1=C(C)N=C(O)NC1=O	160	1.09	0.979	-0.86
omega_284835	-9.30152	-12.281	0.544263	5.18017	4.56805	-4.30296	-3.01002	4	CL6481	DC	6	1	G205-0587	8	N-(2,6-dimethylphenyl)-2-morpholin-4-yl-5-oxo-5H-[1,3,4]thiadiazolo[3,2-a]pyrimidine-6-carboxamide	111.9	O=C(Nc1c(C)cccc1C)C=1C(=O)N2N=C(N3CCOCC3)SC2=NC=1	6	1.11	2.63	-2.75
omega_6212	-9.30128	-12.0509	0.372235	4.44979	5.5831	-4.22341	-3.43208	4	CL1273	DC	6	2	C612-0842	7	3-{[(2-methoxyphenyl)amino]carbonyl}pyrazine-2-carboxylic acid	101.41	O=C(O)c1c(C(=O)Nc2c(OC)cccc2)nccn1	7	-3.14	0.76	1.54
omega_674618	-9.29906	-9.73833	0.190783	3.08706	5.3926	-3.62399	-4.60719	2		DC	7	4	C301-7393	7	N-cyclopentyl-N'-(2,4-dihydroxy-5-pyrimidinyl)urea	107.37	O=C(Nc1c(O)nc(O)nc1)NC1CCCC1	69	-2.92	0.49	-1.73
omega_124354	-9.29786	-8.54345	0.450582	3.40745	5.28211	-5.64169	-4.25285	4	CM0132	DC	6	3	D668-0057	7	N-(3-bromophenyl)-2-hydroxy-6-oxo-1,6-dihydropyrimidine-5-sulfonamide	116.24	Brc1cc(NS(=O)(=O)C=2C(=O)NC(O)=NC=2)ccc1	182	0.3	0.242	-0.97
omega_567092	-9.2967	-9.58807	0.50018	3.45539	3.99179	-3.91017	-3.74582	6		DC	3	3	8009-4994	5	N'~1~-[(E)-1-(2-hydroxyphenyl)methylidene]-2-(1H-indol-3-yl)acetohydrazide	77.48	O=C(NN=Cc1c(O)cccc1)Cc1c2c([nH]c1)cccc2	40	1.85	2.19	-2.67
omega_381156	-9.29492	-12.8577	0.558454	4.32865	3.30122	-2.25191	-2.37364	6		DC	6	4	1988-0300	9	2-(3,5-dioxo-2,3,4,5-tetrahydro-1,2,4-triazin-6-yl)-N'-[(1E)-(2-hydroxy-1-naphthyl)methylene]acetohydrazide	132.25	O=C(NN=Cc1c(O)ccc2c1cccc2)CC=1C(=O)NC(=O)NN=1	19	-0.7	1.15	0.52
omega_537700	-9.29322	-12.9028	0.485722	5.19351	4.04498	-3.50412	-2.61056	8		DC	4	2	8003-5599	5	4-{2-[(E)-1-(4-fluorophenyl)methylidene]hydrazino}-N-mesityl-4-oxobutanamide	70.56	Fc1ccc(C=NNC(=O)CCC(=O)Nc2c(C)cc(C)cc2C)cc1	1	1.48	3.68	-1.75
omega_22592	-9.29312	-11.4624	0.689389	4.73411	4.29071	-4.5799	-2.965	5	CV0299	DC	5	2	C720-0533	6	N-(2-chlorobenzyl)-2-hydroxy-9-methyl-4-oxo-4H-pyrido[1,2-a]pyrimidine-3-carboxamide	82	Clc1c(CNC(=O)C=2C(=O)N3C(C(C)=CC=C3)=NC=2O)cccc1	23	1.5	2.04	-4.24
omega_62100	-9.2927	-11.8065	0.524006	5.13664	4.71863	-4.05423	-3.81124	6	CL5013	DC	5	2	D205-0360	7	N-(6-benzyl-7-hydroxy-5-methyl[1,2,4]triazolo[1,5-a]pyrimidin-2-yl)-2,2-dimethylpropanamide	92.41	O=C(Nc1nn2C(O)=C(Cc3ccccc3)C(C)=Nc2n1)C(C)(C)C	36	1.36	3.96	-2.77
omega_137408	-9.29206	-11.7724	0.468814	4.21543	3.54311	-3.01886	-2.72812	3	CL4356	DC	4	3	E138-2037	5	2-amino-5-bromo-N-(2,3-dimethylphenyl)pyridine-3-sulfonamide	93.46	Brc1cc([O+H][SH0]([O-])=Nc2c(C)c(C)ccc2)c(N)nc1	12	2.61	2.68	-3.47
omega_1475652	-9.29192	-11.7904	0.360663	3.80774	4.84129	-5.55328	-0.957946	4	CM0005	NC	8	0	M876-0916	7	2-(5-{[5-(4-fluorophenyl)-1,3,4-oxadiazol-2-yl]methyl}-1,2,4-oxadiazol-3-yl)pyridine	90.73	Fc1ccc(-c2oc(Cc3onc(-c4ncccc4)n3)nn2)cc1	1	0.237	2.369	-1.44
omega_124374	-9.29107	-9.56245	0.406586	3.68577	5.53189	-5.3127	-4.04016	5	CM0132	DC	6	3	D668-0092	8	2-hydroxy-N-(2-methoxy-5-methylphenyl)-6-oxo-1,6-dihydro-5-pyrimidinesulfonamide	125.47	S(=O)(=O)(Nc1c(OC)ccc(C)c1)C=1C(=O)NC(O)=NC=1	149	0.09	-0.037	-0.1
omega_335008	-9.29095	-13.4739	0.498812	5.7256	4.79671	-3.96908	-2.86905	4	CL7215	DC	4	2	G751-0510	5	6-methyl-2-{[(5-phenyl-4H-1,2,4-triazol-3-yl)thio]methyl}quinolin-4(1H)-one	95.97	S(CC=1Nc2c(C(=O)C=1)cc(C)cc2)c1[nH]c(-c2ccccc2)nn1	100	2.83	3.5	-1.76
omega_558732	-9.2904	-9.71312	0.377699	3.738	2.90258	-3.21704	-3.37851	7		DC	3	1	8008-0959	4	[formyl(methyl)amino]methyl(phenethyl)phosphinic acid	57.61	P(=O)(O)(CN(C=O)C)CCc1ccccc1	60	2.36	0.6	-2.22
omega_929972	-9.29014	-12.1728	0.501584	4.35734	2.99902	-4.25779	-0.717467	3		DC	3	1	Y200-0269	3	N~1~-(3-pyridylmethyl)-1-naphthamide	41.99	O=C(NCc1cnccc1)c1c2c(ccc1)cccc2	1	2.62	2.62	-3.23
omega_953248	-9.2899	-14.7174	0.338135	5.6387	5.33769	-3.56218	-2.32483	5		DC	6	2	Y042-7236	6	3-(4-methoxyphenyl)-N~1~-(4-oxo-3,4-dihydro-6-quinazolinyl)propanamide	79.79	O=C(Nc1cc2C(=O)NC=Nc2cc1)CCc1ccc(OC)cc1	30	1.73	1.73	-5.17
omega_87061	-9.2896	-13.9562	0.558847	5.68626	5.28608	-4.04157	-2.82303	6	CL7372	DC	6	2	D351-0097	8	2-(4-chlorophenyl)-5-{[(2,4-dimethoxyphenyl)amino]methyl}[1,2,4]triazolo[1,5-a]pyrimidin-7(4H)-one	90.3	Clc1ccc(-c2nn3C(=O)C=C(CNc4c(OC)cc(OC)cc4)Nc3n2)cc1	130	1.47	2.98	-2.35
omega_13573	-9.28772	-13.9021	0.597572	6.39022	3.01925	-3.10521	-2.28746	5	CL6032	DC	8	1	C660-0800	6	ethyl 6-methyl-4-{[3-(trifluoromethyl)phenyl]amino}furo[2,3-d]pyrimidine-5-carboxylate	77.25	FC(F)(F)c1cc(Nc2ncnc3oc(C)c(C(=O)OCC)c23)ccc1	128	2.02	3.8	-2.7
omega_196556	-9.28749	-12.3436	0.734986	4.97772	5.85351	-5.49535	-3.01473	5	CL7565	DC	6	1	F081-1461	8	N-(2-furylmethyl)-2-(4-oxo-7,8,9,10-tetrahydropyrimido[4',5':4,5]furo[2,3-b]quinolin-3(4H)-yl)acetamide	100.94	O=C(NCc1occc1)CN1C(=O)c2oc3nc4c(cc3c2N=C1)CCCC4	62	0.9	0.58	-1.36
omega_335250	-9.28657	-11.2457	0.375982	4.35529	4.79822	-4.00072	-3.56968	5	CL7215	DC	5	2	G751-2186	5	6-fluoro-2-{[(5-propyl-4H-1,2,4-triazol-3-yl)thio]methyl}quinolin-4(1H)-one	95.97	S(CC=1Nc2c(C(=O)C=1)cc(F)cc2)c1[nH]c(CCC)nn1	135	2.16	2.68	-4.23
omega_1513992	-9.28614	-13.9078	0.781907	6.99102	5.16631	-4.05721	-4.26039	2	CM1524	NC	7	2	S021-1344	7	2-(2-chlorophenyl)-6-(1H-indol-3-ylcarbonyl)-5,6,7,8-tetrahydropyrazolo[1,5-a]pyrido[3,4-d]pyrimidin-9(1H)-one	80.8	Clc1c(C=2NN3C(=O)C4=C(N=C3C=2)CN(C(=O)c2c3c([nH]c2)cccc3)CC4)cccc1	46	2.35237	3.75	-2.19056
omega_547419	-9.28608	-12.7764	0.450886	5.0754	1.94818	-0.748512	-3.23565	5	CL1674	DC	5	2	8005-5553	5	3-[(5-chloro-2-methylanilino)methyl]-5-[(Z)-1-(2-hydroxyphenyl)methylidene]-1,3-thiazolane-2,4-dione	69.64	Clc1cc(NCN2C(=O)C(=Cc3c(O)cccc3)SC2=O)c(C)cc1	16	3.52	4.72	-3.41
omega_416844	-9.28582	-11.3008	0.254135	3.66022	3.11611	-2.04964	-2.96585	6		DC	6	3	3253-4022	6	N'-[(1E)-(5-bromo-2-hydroxyphenyl)methylene]-3-thien-2-yl-1H-pyrazole-5-carbohydrazide	90.37	Brc1cc(C=NNC(=O)c2[nH]nc(-c3sccc3)c2)c(O)cc1	106	3.67	3.57	-2.67
omega_14969	-9.28459	-12.9935	0.508027	5.37743	4.08367	-4.34449	-1.9157	4	CL3446	DC	6	0	C679-2937	6	7-[(2,3-dimethylphenoxy)methyl]-2-(2-furyl)-5H-[1,3,4]thiadiazolo[3,2-a]pyrimidin-5-one	92.7	O(CC=1N=C2SC(c3occc3)=NN2C(=O)C=1)c1c(C)c(C)ccc1	6	3	3.67	-3.96
omega_1500229	-9.284	-11.5885	0.499757	3.91821	4.05983	-3.52116	-2.65218	5	CM0615	NC	4	3	P574-1440	6	2-[2-amino-4-ethyl-6-oxo-1(6H)-pyrimidinyl]-N-(4-fluoro-2-methylphenyl)acetamide	87.79	Fc1cc(C)c(NC(=O)CN2C(N)=NC(CC)=CC2=O)cc1	98	1.614	2.032	1.25
omega_1470701	-9.2819	-12.308	0.441963	4.18958	3.13469	-3.44789	-1.29228	5	CL9870	NC	4	1	M710-0810	5	N-(4-methylbenzyl)-6-pyrimidin-5-ylnicotinamide	67.77	O=C(NCc1ccc(C)cc1)c1cnc(-c2cncnc2)cc1	32	2.248	2.125	-1.89
omega_1081456	-9.28168	-10.5606	0.392852	3.89948	3.95776	-4.66863	-2.3025	5	CM4373	IC	6	1	T161-0616	6	N-[2-(1-isopropyl-5-methyl-1H-imidazol-2-yl)ethyl]-2-pyrazinecarboxamide	72.7	O=C(NCCc1n(C(C)C)c(C)cn1)c1nccnc1	4	0.6	1.1	-1.47
omega_1066690	-9.2813	-10.8207	0.712271	4.67984	4.39815	-5.9316	-2.31926	6	CM5350	IC	6	0	SB54-0709	6	2-[(3S,4S)-4-(methoxymethyl)-1-(2-pyridylmethyl)tetrahydro-1H-pyrrol-3-yl]-5-phenyl-1,3,4-oxadiazole	64.28	O(C[C@H]1[C@H](c2oc(-c3ccccc3)nn2)CN(Cc2ncccc2)C1)C	29	2.7	2.75	-3.72
omega_1500396	-9.28013	-12.4929	0.480293	4.4729	4.83113	-3.9343	-2.63723	7	CM0615	NC	5	3	P574-4678	8	2-[2-amino-4-(methoxymethyl)-6-oxo-1(6H)-pyrimidinyl]-N~1~-(2-methoxy-5-methylphenyl)acetamide	106.25	O=C(Nc1c(OC)ccc(C)c1)CN1C(N)=NC(COC)=CC1=O	39	0.653	0.807	1.59
omega_285010	-9.28006	-10.3625	0.573659	4.24412	4.6304	-5.32678	-3.03894	6	CL6481	DC	6	1	G205-1234	7	2-azepan-1-yl-5-oxo-N-(2-thien-2-ylethyl)-5H-[1,3,4]thiadiazolo[3,2-a]pyrimidine-6-carboxamide	130.91	O=C(NCCc1sccc1)C=1C(=O)N2N=C(N3CCCCCC3)SC2=NC=1	177	3.48	3.11	-3.21
omega_62087	-9.27882	-12.2717	0.45917	4.61111	5.11843	-3.72961	-3.46624	6	CL5013	DC	6	2	D205-0341	8	N-(6-benzyl-7-hydroxy-5-methyl[1,2,4]triazolo[1,5-a]pyrimidin-2-yl)tetrahydrofuran-2-carboxamide	101.64	O=C(Nc1nn2C(O)=C(Cc3ccccc3)C(C)=Nc2n1)C1OCCC1	159	0.02	2.74	-1.14
omega_124431	-9.27675	-11.7847	0.413032	5.04687	4.92905	-4.20125	-3.67971	4	CM0132	DC	5	3	D668-0234	7	2-hydroxy-4-methyl-N-(2-methylphenyl)-6-oxo-1,6-dihydropyrimidine-5-sulfonamide	116.24	S(=O)(=O)(Nc1c(C)cccc1)C1=C(C)N=C(O)NC1=O	187	0.33	0.493	-0.14
omega_103346	-9.27667	-12.7889	0.463483	5.18804	4.42095	-3.91122	-2.64907	3	CL8250	DC	3	2	D433-1513	6	2-(anilinomethyl)-5-methyl-6-(4-methylbenzyl)[1,2,4]triazolo[1,5-a]pyrimidin-7(4H)-one	71.84	O=C1C(Cc2ccc(C)cc2)=C(C)Nc2n1nc(CNc1ccccc1)n2	229	0.89	3.42	-1.49
omega_235646	-9.27661	-12.8508	0.849215	5.97491	3.65343	-3.75741	-3.14596	5	CL8057	DC	3	3	F477-3034	4	8-fluoro-N-(2-hydroxypropyl)-3-phenylthieno[3,2-c]quinoline-2-carboxamide	90.46	Fc1cc2c3sc(C(=O)NCC(O)C)c(-c4ccccc4)c3cnc2cc1	27	3.68	3.91	-3.28
omega_534255	-9.27454	-12.3426	0.311355	4.73371	2.23347	-1.94753	-2.26298	7		DC	4	2	8002-9216	4	2-(2,6-dibromo-4-methylanilino)-N'~1~-[(E,2E)-3-phenyl-2-propenylidene]acetohydrazide	53.49	Brc1c(NCC(=O)NN=CC=Cc2ccccc2)c(Br)cc(C)c1	30	4.21	4.3	-3.72
omega_103319	-9.27452	-11.9905	0.437346	4.76482	4.37871	-4.14975	-2.71515	3	CL8250	DC	4	2	D433-1468	6	6-benzyl-2-{[(4-fluorophenyl)amino]methyl}-5-methyl[1,2,4]triazolo[1,5-a]pyrimidin-7(4H)-one	71.84	Fc1ccc(NCc2nn3C(=O)C(Cc4ccccc4)=C(C)Nc3n2)cc1	214	1.09	3.14	-2.15
omega_22601	-9.2733	-10.0089	0.620107	3.83211	4.32182	-4.55482	-3.48357	5	CV0299	DC	5	2	C720-0543	7	N-(2-furylmethyl)-2-hydroxy-9-methyl-4-oxo-4H-pyrido[1,2-a]pyrimidine-3-carboxamide	95.14	O=C(NCc1occc1)C=1C(=O)N2C(C(C)=CC=C2)=NC=1O	25	0.23	0	-2
omega_358031	-9.27313	-12.8277	0.247721	4.83577	1.82624	-1.86217	-1.49298	5		DC	4	2	0784-0386	4	N'-[(1E)-(3-bromophenyl)methylene]-3-hydroxy-2-naphthohydrazide	61.69	Brc1cc(C=NNC(=O)c2c(O)cc3c(c2)cccc3)ccc1	1	3.02	4.07	-4.42
omega_942148	-9.27242	-6.73283	0.123631	1.98326	3.89196	-5.07788	-3.46056	2		DC	4	1	8017-6163	4	5-(2-thienylmethyl)-2H-1,2,3,4-tetraazole	82.7	C(c1n[nH]nn1)c1sccc1	31	-0.98	0.92	-2.02
omega_945564	-9.2722	-11.7727	0.146241	4.60189	2.39449	-2.45294	-2.18917	3		DC	4	2	8018-8213	4	2-amino-4,5-dimethyl-1-(3-pyridylmethyl)-1H-pyrrol-3-yl cyanide	67.63	N#Cc1c(N)n(Cc2cnccc2)c(C)c1C	31	-0.0774	-0.0772	-2.07
omega_1531874	-9.27137	-11.6558	0.394502	5.62164	2.99905	-4.03346	-2.59731	2	CL5757	NC	1	1	Z601-0810	4	N~2~-ethyl-3-(1H-pyrrol-1-yl)thieno[2,3-c]pyridine-2-carboxamide	75.16	O=C(NCC)c1c(-n2cccc2)c2c(s1)cncc2	3	2.648	2.151	-3.23
omega_1222947	-9.26994	-11.678	0.693967	4.92133	4.86844	-4.4647	-3.61098	4	CL3447	NC	6	1	C679-2629	6	7-[(1H-benzimidazol-2-ylthio)methyl]-2-(3-methylphenyl)-5H-[1,3,4]thiadiazolo[3,2-a]pyrimidin-5-one	124.31	S(CC=1N=C2SC(c3cc(C)ccc3)=NN2C(=O)C=1)c1[nH]c2c(n1)cccc2	87	4.16	4.96	-4.27
omega_649635	-9.26987	-12.2126	0.76392	6.26485	5.52442	-5.58904	-4.02146	8	CL4907	DC	6	2	C200-3930	8	2-(benzylamino)-N-(2-methoxyethyl)-5-oxo-5H-[1,3,4]thiadiazolo[2,3-b]quinazoline-8-carboxamide	120.69	O=C(NCCOC)c1cc2N=C3SC(NCc4ccccc4)=NN3C(=O)c2cc1	8	1.4	3.26	-0.53
omega_1250045	-9.26667	-11.57	0.550674	4.55187	2.46136	-3.06316	-2.19745	2	CL4819	NC	3	0	E243-0089	4	3-(3-methylbenzyl)[1]benzofuro[3,2-d]pyrimidin-4(3H)-one	45.81	O=C1N(Cc2cc(C)ccc2)C=Nc2c3c(oc12)cccc3	133	3.2	2.95	-3.74
omega_6275	-9.26627	-11.8149	0.515534	4.61624	5.23407	-4.38981	-3.42743	5		DC	6	2	C612-1079	7	N-(3,4-dimethoxyphenyl)-3-(hydroxymethyl)pyrazine-2-carboxamide	93.57	O=C(Nc1cc(OC)c(OC)cc1)c1c(CO)nccn1	16	-0.56	0.32	-1.26
omega_557826	-9.26437	-9.14577	0.415504	3.45249	4.02346	-4.10984	-3.90022	4		DC	5	2	8007-7986	5	5-(4-ethoxybenzyl)-2,4-pyrimidinediol	75.47	O(CC)c1ccc(Cc2c(O)nc(O)nc2)cc1	8	-1.96	1.48	-2.31
omega_320681	-9.26224	-11.5034	0.672536	4.48493	3.75488	-3.85443	-2.81675	4	CL2813	DC	5	1	G595-0491	5	4-oxo-N-(2-phenylpropyl)-7,8-dihydro-4H,6H-cyclopenta[4,5][1,3]thiazolo[3,2-a]pyrimidine-3-carboxamide	87.07	O=C(NCC(C)c1ccccc1)C=1C(=O)N2C(SC3=C2CCC3)=NC=1	1	2.1	2.1	-4.3
omega_524902	-9.26193	-12.9392	0.693903	4.83662	2.83594	-2.31501	-2.37418	4	CL2968	DC	5	2	7287-0822	7	N-(4-hydroxy-1-naphthyl)-3-methyl-2-oxo-2,3-dihydro-1,3-benzoxazole-6-sulfonamide	104.32	[SH0]([O+H]c1cc2OC(=O)N(C)c2cc1)([O-])=Nc1c2c(c(O)cc1)cccc2	2	2.21	2.67	-4.84
omega_107093	-9.25701	-12.5427	0.517073	4.69604	4.79208	-4.56022	-2.15931	4	CL6729A	DC	4	1	D458-0719	6	2-(5,7-dimethyl-2-propyl[1,2,4]triazolo[1,5-a]pyrimidin-6-yl)-N-phenylacetamide	72.18	O=C(Nc1ccccc1)CC1=C(C)n2nc(CCC)nc2N=C1C	124	3.05	2.7	-3.02
omega_124455	-9.25594	-11.1047	0.560569	5.10082	5.03005	-4.35764	-4.48507	4	CM0132	DC	7	3	D668-0267	7	N-(3,5-dichlorophenyl)-2-hydroxy-4-methyl-6-oxo-1,6-dihydropyrimidine-5-sulfonamide	116.24	Clc1cc(Cl)cc(NS(=O)(=O)C2=C(C)N=C(O)NC2=O)c1	163	1.46	1.336	-2.38
omega_22688	-9.25486	-10.8156	0.821165	4.15937	4.80522	-4.65241	-3.57263	6	CV0299	DC	5	2	C720-0658	7	2-hydroxy-N-(4-methoxybenzyl)-4-oxo-4H-pyrido[1,2-a]pyrimidine-3-carboxamide	91.23	O=C(NCc1ccc(OC)cc1)C=1C(=O)N2C(=NC=1O)C=CC=C2	62	0.33	0.8	-0.85
omega_22671	-9.25384	-10.0716	0.519656	3.69254	4.24408	-4.46074	-3.17775	5	CV0299	DC	4	2	C720-0633	6	2-hydroxy-N-isobutyl-4-oxo-4H-pyrido[1,2-a]pyrimidine-3-carboxamide	82	O=C(NCC(C)C)C=1C(=O)N2C(=NC=1O)C=CC=C2	79	-0.37	0.43	-1.92
omega_584861	-9.25322	-10.3986	0.41151	4.38772	3.89202	-3.53302	-4.01288	2		DC	5	2	8013-0808	5	N~1~-cyclopropyl-4-oxo-3,4-dihydro-1-phthalazinecarboxamide	70.56	O=C(NC1CC1)C1=NNC(=O)c2c1cccc2	15	1.25	1.25	-3.04
omega_516598	-9.25141	-12.9919	0.272884	5.02949	3.86543	-2.67645	-2.75083	4	CL2609	DC	4	3	6540-0277	6	3-[2-(3,5-dimethyl-1H-pyrazol-4-yl)-2-oxoethyl]-3-hydroxy-1,3-dihydro-2H-indol-2-one	66.4	O=C(CC1(O)C(=O)Nc2c1cccc2)c1c(C)[nH]nc1C	1	1.86	0.51	-0.72
omega_113232	-9.25089	-12.7383	0.418198	5.46099	4.10234	-3.77805	-2.71605	4	CL7372	DC	2	4	D489-0093	6	5-(anilinomethyl)-2-(4-fluorophenyl)[1,2,4]triazolo[1,5-a]pyrimidin-7(4H)-one	71.84	Fc1ccc(-c2nn3C(=O)C=C(CNc4ccccc4)Nc3n2)cc1	175	1.14	2.84	-2.03
omega_22590	-9.24969	-10.5954	0.635908	4.57787	4.10353	-4.14929	-3.82233	4	CV0299	DC	4	2	C720-0526	6	N-cyclohexyl-2-hydroxy-9-methyl-4-oxo-4H-pyrido[1,2-a]pyrimidine-3-carboxamide	82	O=C(NC1CCCCC1)C=1C(=O)N2C(C(C)=CC=C2)=NC=1O	61	0.96	1.65	-1.33
omega_275431	-9.2492	-9.70656	0.373398	3.77832	4.60854	-3.10208	-5.20082	2		DC	6	2	FF20-1503	6	1-(6-oxo-1,6-dihydro-4-pyridazinyl)-4-piperidinecarboxylic acid	82	O=C(O)C1CCN(C2=CC(=O)NN=C2)CC1	487	-3.51	-0.65	-1.43
omega_942768	-9.24741	-10.9424	0.143363	3.36881	4.66366	-3.36493	-3.11594	3		DC	6	1	8017-7430	6	4-bromo-2-methoxy-5-(1H-1,2,3,4-tetraazol-5-yl)phenyl methyl ether	72.92	Brc1c(-c2[nH]nnn2)cc(OC)c(OC)c1	31	-0.00188	1.98	-2.91
omega_284786	-9.24732	-11.2799	0.512995	4.78616	4.98001	-5.1813	-3.06527	7	CL6481	DC	7	1	G205-0444	9	N-[2-(4-ethylpiperazin-1-yl)ethyl]-2-(4-methylpiperidin-1-yl)-5-oxo-5H-[1,3,4]thiadiazolo[3,2-a]pyrimidine-6-carboxamide	109.15	O=C(NCCN1CCN(CC)CC1)C=1C(=O)N2N=C(N3CCC(C)CC3)SC2=NC=1	7	-0.11	2.01	0.87
omega_87060	-9.24646	-13.8451	0.585005	5.94911	4.07016	-3.49247	-2.5132	4	CL7372	DC	7	2	D351-0095	6	2-(4-chlorophenyl)-5-({[2-(trifluoromethyl)phenyl]amino}methyl)[1,2,4]triazolo[1,5-a]pyrimidin-7(4H)-one	71.84	Clc1ccc(-c2nn3C(=O)C=C(CNc4c(C(F)(F)F)cccc4)Nc3n2)cc1	173	2.81	3.95	-2.79
omega_548006	-9.24606	-11.4533	0.293988	4.09164	2.559	-1.89383	-2.84351	6		DC	5	3	8005-6484	5	N'~1~-[(E)-1-(2-hydroxy-5-methylphenyl)methylidene]-2-(2-toluidino)acetohydrazide	73.72	O=C(N/N=C/c1c(O)ccc(C)c1)CNc1c(C)cccc1	29	3.52	3.56	-3.85
omega_622744	-9.24328	-8.46818	0.287719	2.76026	4.41602	-4.09552	-4.14358	2		DC	7	0	8020-2484F	5	5-[(3-chloroanilino)methyl]-1,2-dihydro-3H-1,2,4-triazol-3-one	62.97	Clc1cc(NCC2=NC(=O)NN2)ccc1	8	0.22	0.31	-2.34
omega_87057	-9.24215	-13.0434	0.462769	5.64331	4.18882	-3.5448	-2.94888	4	CL7372	DC	4	2	D351-0092	6	2-(4-chlorophenyl)-5-{[(3-methylphenyl)amino]methyl}[1,2,4]triazolo[1,5-a]pyrimidin-7(4H)-one	71.84	Clc1ccc(-c2nn3C(=O)C=C(CNc4cc(C)ccc4)Nc3n2)cc1	112	2.43	3.5	-2.36
omega_215154	-9.23975	-14.944	0.520124	4.98678	2.9545	-1.72747	-1.02967	2	CL7739	DC	5	1	F315-0600	6	5-isoxazol-5-yl-2-methyl-N-1-naphthylfuran-3-sulfonamide	93.72	[SH0]([O+H]c1c(C)oc(-c2oncc2)c1)([O-])=Nc1c2c(ccc1)cccc2	85	3.25	3.03	-5.09
omega_423228	-9.23806	-12.2161	0.520021	4.51365	2.10297	-2.48899	-1.66965	5		DC	6	2	3284-0274	6	2-(3,5-dimethyl-1H-pyrazol-1-yl)-N'~1~-[(E)-1-(2-hydroxy-1-naphthyl)methylidene]acetohydrazide	79.51	O=C(N/N=C/c1c(O)ccc2c1cccc2)Cn1c(C)cc(C)n1	3	3.1738	2.66	-1.90431
omega_714598	-9.23741	-11.8046	0.645315	4.41953	4.66941	-4.7045	-2.46259	4	CL2813A	DC	6	1	G896-0324	7	N-[1-(2,3-dihydro-1,4-benzodioxin-6-yl)ethyl]-5-oxo-5H-[1,3]thiazolo[3,2-a]pyrimidine-6-carboxamide	105.53	O=C(NC(C)c1cc2OCCOc2cc1)C=1C(=O)N2C(SC=C2)=NC=1	7	1.4	0.8	-2.55
omega_944916	-9.23716	-10.4803	0.477162	2.87897	4.08334	-3.80002	-2.39635	3		DC	7	2	8018-3103	7	N~1~-[(1,5-dimethyl-1H-pyrrol-2-yl)methyl]-N~2~-(5-methyl-3-isoxazolyl)ethanediamide	89.16	O=C(NCc1n(C)c(C)cc1)C(=O)Nc1noc(C)c1	30	0.81	0.81	-2.64
omega_1228554	-9.23501	-10.796	0.424962	3.44215	3.42407	-3.84636	-1.88386	5	CL4444	NC	6	0	D035-0125	5	3-benzyl-7-(butylthio)-4H-[1,3,4]thiadiazolo[2,3-c][1,2,4]triazin-4-one	107.99	S(CCCC)C=1SC=2N(C(=O)C(Cc3ccccc3)=NN=2)N=1	17	3.94	4.69	0.94
omega_415157	-9.23423	-12.1648	0.296258	3.71164	2.46077	-2.62111	-0.91698	4	CL1816	DC	5	1	3237-1159	6	(4E)-2-(2-furyl)-4-{[(4-methoxyphenyl)amino]methylene}-1,3-oxazol-5(4H)-one	73.06	O(C)c1ccc(NC=C2C(=O)OC(c3occc3)=N2)cc1	1	2.26	1.2	-2.69
omega_1337304	-9.23377	-10.6161	0.542353	3.52093	3.15012	-4.31491	-1.51621	4	CL2717	NC	4	1	G822-0800	4	N-benzyl-7-chlorofuro[2,3-b]quinoline-2-carboxamide	55.13	Clc1cc2nc3oc(C(=O)NCc4ccccc4)cc3cc2cc1	144	4.52	4.13	-6.1
omega_685241	-9.23371	-14.0284	0.697207	5.27564	4.52935	-2.72836	-2.9791	8	CL2560	DC	4	2	C385-0317	7	N,N-diethyl-6-{[(4-ethylphenyl)amino]sulfonyl}-4-oxo-1,4-dihydroquinoline-3-carboxamide	95.58	[S+]([O+H2])(=O)(Nc1ccc(CC)cc1)c1cc2C(=O)C(C(=O)N(CC)CC)=CNc2cc1	69	3.85	2.44	-5.37
omega_22619	-9.23292	-9.44546	0.536202	3.65309	4.21078	-4.62702	-3.56052	6	CV0299	DC	4	2	C720-0569	6	N-butyl-2-hydroxy-8-methyl-4-oxo-4H-pyrido[1,2-a]pyrimidine-3-carboxamide	82	O=C(NCCCC)C=1C(=O)N2C(=NC=1O)C=C(C)C=C2	92	0.07	1.01	-2.17
omega_983664	-9.23261	-13.2458	0.589836	5.18156	3.98634	-3.9309	-1.81369	3	CM1198	IC	9	1	S454-0077	9	1H-indol-2-yl{4-[4-(3-methyl-1,2,4-oxadiazol-5-yl)-1H-1,2,3-triazol-1-yl]piperidino}methanone	105.73	O=C(N1CCC(n2nnc(-c3onc(C)n3)c2)CC1)c1[nH]c2c(c1)cccc2	110	3.26	3.26	-5.51
omega_103351	-9.23094	-12.2818	0.464443	5.09339	4.29886	-4.0608	-2.74504	3	CL8250	DC	4	2	D433-1518	6	2-{[(4-fluorophenyl)amino]methyl}-5-methyl-6-(4-methylbenzyl)[1,2,4]triazolo[1,5-a]pyrimidin-7(4H)-one	71.84	Fc1ccc(NCc2nn3C(=O)C(Cc4ccc(C)cc4)=C(C)Nc3n2)cc1	224	1.47	3.63	-3.29
omega_501677	-9.23086	-13.5853	0.398069	5.72858	2.68687	-3.19735	-1.26179	1		DC	1	1	5947-0021	3	4-chloro-2,6-dimethyl-N-[3-(trifluoromethyl)phenyl]nicotinamide	41.99	Clc1c(C(=O)Nc2cc(C(F)(F)F)ccc2)c(C)nc(C)c1	68	4.37	3.74	-3.36
omega_781361	-9.23031	-13.0985	0.649626	4.50368	3.6242	-2.65733	-2.25194	7	CL2277	DC	6	1	K905-0101	7	ethyl 2-{[(6-methyl-4-oxothieno[2,3-d]pyrimidin-3(4H)-yl)acetyl]amino}benzoate	88.07	O=C(Nc1c(C(=O)OCC)cccc1)CN1C(=O)c2c(sc(C)c2)N=C1	16	1.74	1.24	-0.58
omega_209208	-9.22988	-8.60792	0.499139	3.549	4.74527	-5.71612	-3.69924	2	CL6186A	DC	8	2	F235-1687	8	1,3-dimethyl-5-[(2H-1,2,3,4-tetraazol-5-ylamino)methyl]-1,3-dihydro-2H-1,3-benzimidazol-2-one	90.04	O=C1N(C)c2c(N1C)ccc(CNc1n[nH]nn1)c2	1	-1.19	0.33	-2.62
omega_1012552	-9.22948	-12.9853	0.234563	5.67191	1.54168	-2.00893	-1.68344	4	CM4363	IC	4	0	S694-1355	4	4-(5-methyl-1-{1-[(3-methyl-2-thienyl)methyl]tetrahydro-1H-pyrrol-3-yl}-1H-imidazol-2-yl)pyridine	62.19	C(N1CC(n2c(-c3ccncc3)ncc2C)CC1)c1c(C)ccs1	26	1.86	2.7	-3.97
omega_1464599	-9.22853	-12.3999	0.480505	3.93033	4.77799	-3.77905	-2.23844	2	CL7308	NC	1	3	M503-1165	6	4-amino-N~5~-benzyl-2-(1-pyrrolidinyl)-5-pyrimidinecarboxamide	84.14	O=C(NCc1ccccc1)c1c(N)nc(N2CCCC2)nc1	18	1.25619	1.161	-0.122718
omega_366273	-9.22714	-10.625	0.400695	3.29602	3.46498	-2.69568	-3.06813	9		DC	4	3	1352-0500	7	N-[2-(2-{(E)-1-[4-(dimethylamino)phenyl]methylidene}hydrazino)-2-oxoethyl]-2-hydroxybenzamide	94.03	O=C(NN=Cc1ccc(N(C)C)cc1)CNC(=O)c1c(O)cccc1	68	2.58	1.64	-1.01
omega_538863	-9.22633	-12.3991	0.26226	4.93086	1.88264	-1.91184	-1.99113	5		DC	4	2	8003-8170	4	N'~2~-[(E)-1-(2-fluorophenyl)methylidene]-3-hydroxy-2-naphthohydrazide	61.69	Fc1c(C=NNC(=O)c2c(O)cc3c(c2)cccc3)cccc1	38	3.93	3.53	-4.17
omega_277511	-9.22618	-12.085	0.611679	5.33539	2.76874	-3.68786	-2.16914	5	CL5886	DC	4	0	G020-0049	5	2-ethyl-5-(ethylthio)-6-(4-methylbenzyl)-2,6-dihydro-7H-pyrazolo[4,3-d]pyrimidin-7-one	75.79	S(CC)C=1N(Cc2ccc(C)cc2)C(=O)c2nn(CC)cc2N=1	5	4.16	3.53	-5.94
omega_516139	-9.2254	-12.3508	0.366388	4.50741	4.39753	-3.03544	-3.11045	5		DC	5	3	6516-0002	6	2-({5-[(2-methyl-1H-indol-3-yl)methyl]-1,3,4-oxadiazol-2-yl}thio)acetamide	123.1	S(CC(=O)N)c1oc(Cc2c(C)[nH]c3c2cccc3)nn1	2	1.36	1.54	-2.41
omega_103350	-9.22525	-12.2687	0.58797	4.76727	4.43491	-3.99074	-2.75601	4	CL8250	DC	4	2	D433-1517	7	2-{[(2-methoxyphenyl)amino]methyl}-5-methyl-6-(4-methylbenzyl)[1,2,4]triazolo[1,5-a]pyrimidin-7(4H)-one	81.07	O(C)c1c(NCc2nn3C(=O)C(Cc4ccc(C)cc4)=C(C)Nc3n2)cccc1	250	2.04	3.41	-2.27
omega_87119	-9.22513	-13.1107	0.50702	5.84839	4.28855	-3.82731	-2.93111	5	CL7372	DC	4	2	D351-0203	7	5-{[(2,4-dimethylphenyl)amino]methyl}-2-(4-methoxyphenyl)[1,2,4]triazolo[1,5-a]pyrimidin-7(4H)-one	81.07	O(C)c1ccc(-c2nn3C(=O)C=C(CNc4c(C)cc(C)cc4)Nc3n2)cc1	141	2.1	3.3	-2.46
omega_284782	-9.21938	-10.2448	0.578091	3.95838	4.90044	-5.29425	-3.1172	6	CL6481	DC	7	1	G205-0410	9	2-(4-methylpiperidin-1-yl)-N-(2-morpholin-4-ylethyl)-5-oxo-5H-[1,3,4]thiadiazolo[3,2-a]pyrimidine-6-carboxamide	115.14	O=C(NCCN1CCOCC1)C=1C(=O)N2N=C(N3CCC(C)CC3)SC2=NC=1	71	0.85	1.39	-1.12
omega_106976	-9.21921	-12.8572	0.597107	5.11844	4.76762	-4.68874	-2.15645	3	CL6729A	DC	6	1	D458-0462	7	2-(5,7-dimethyl-2-pyridin-3-yl[1,2,4]triazolo[1,5-a]pyrimidin-6-yl)-N-(2-fluorophenyl)acetamide	85.07	Fc1c(NC(=O)CC2=C(C)n3nc(-c4cnccc4)nc3N=C2C)cccc1	184	2.43	2.3	-3.26
omega_419785	-9.2188	-10.8056	0.362609	4.14696	5.04063	-5.26323	-2.70019	5		DC	5	2	3254-3666	6	3-(4-fluorophenyl)-N'~5~-[(E)-1-(2-pyridyl)methylidene]-1H-pyrazole-5-carbohydrazide	83.03	Fc1ccc(-c2n[nH]c(C(=O)NN=Cc3ncccc3)c2)cc1	107	1.95	3.41	-2.31
omega_1447492	-9.21656	-13.8689	0.52496	6.78792	2.99905	-3.58239	-2.07724	6	CL9387	NC	4	1	M056-1048	4	N-(2-chloro-4-fluorobenzyl)-2-[4-(ethylsulfanyl)-1H-pyrrolo[3,2-c]pyridin-1-yl]acetamide	72.22	Clc1c(CNC(=O)Cn2c3c(c(SCC)ncc3)cc2)ccc(F)c1	1	4.28	4.54	-5.07
omega_1004655	-9.21607	-10.3353	0.434712	4.06397	3.96961	-3.90545	-3.44359	2	CM4193	IC	7	1	S636-0463	7	7-(phenylsulfonyl)-2,5,6,7,8,9-hexahydro-3H-[1,2,4]triazolo[4,3-d][1,4]diazepin-3-one	90.46	S(=O)(=O)(N1CCN2C(=O)NN=C2CC1)c1ccccc1	39	0.85	0.89	-3.35
omega_732443	-9.21581	-11.4354	0.417636	4.38441	3.66755	-3.61134	-2.63867	5		DC	4	2	K007-0378	5	3-hydroxy-N'-[(1E)-1-pyridin-2-ylethylidene]-2-naphthohydrazide	74.58	O=C(NN=C(C)c1ncccc1)c1c(O)cc2c(c1)cccc2	185	2.83	2.58	-1.8
omega_770328	-9.21565	-11.5922	0.751323	6.11598	3.54485	-4.18378	-3.85186	6	CL2555	DC	4	2	K788-0499	4	6-bromo-2-hydroxy-N-[2-(3-methylphenyl)ethyl]quinoline-4-carboxamide	62.22	Brc1cc2c(C(=O)NCCc3cc(C)ccc3)cc(O)nc2cc1	181	4.91	4.64	-2.82
omega_942573	-9.2151	-11.5021	0.27561	4.29977	2.69764	-3.5141	-1.47195	3		DC	4	1	8017-7024	4	N~4~-(4-fluorobenzyl)-1,5-dimethyl-1H-pyrazole-4-carboxamide	46.92	Fc1ccc(CNC(=O)c2c(C)n(C)nc2)cc1	31	0.26	0.26	-2.5
omega_90468	-9.21496	-11.7946	0.572388	4.53274	3.61546	-3.73958	-2.40133	3	CL2813A	DC	5	1	D358-0055	5	N-(3-chloro-2-methylphenyl)-5-oxo-5H-[1,3]thiazolo[3,2-a]pyrimidine-6-carboxamide	87.07	Clc1c(C)c(NC(=O)C=2C(=O)N3C(SC=C3)=NC=2)ccc1	235	2.91	1.78	-4.38
omega_1500217	-9.21484	-12.2963	0.491618	4.49711	4.14315	-3.42444	-2.62595	5	CM0615	NC	3	3	P574-1376	6	2-(2-amino-4-ethyl-6-oxopyrimidin-1(6H)-yl)-N-(2,3-dimethylphenyl)acetamide	87.79	O=C(Nc1c(C)c(C)ccc1)CN1C(N)=NC(CC)=CC1=O	107	2.096	2.313	0.11
omega_1500212	-9.21459	-11.7747	0.477091	3.71499	3.90588	-3.02076	-2.51714	5	CM0615	NC	3	3	P574-1368	6	2-(2-amino-4-ethyl-6-oxopyrimidin-1(6H)-yl)-N-(4-methylphenyl)acetamide	87.79	O=C(Nc1ccc(C)cc1)CN1C(N)=NC(CC)=CC1=O	136	2.175	1.827	0.49
omega_1500256	-9.21417	-12.3562	0.578677	4.27583	4.29267	-3.45519	-2.55	6	CM0615	NC	4	3	P574-2321	7	2-(2-amino-4-ethyl-5-methyl-6-oxopyrimidin-1(6H)-yl)-N-(2-methoxy-5-methylphenyl)acetamide	97.02	O=C(Nc1c(OC)ccc(C)c1)CN1C(=O)C(C)=C(CC)N=C1N	17	2.85	2.363	-1.15
omega_424458	-9.21407	-11.8532	0.323622	4.4383	3.43539	-2.79216	-2.76599	5		DC	6	2	3305-0127	8	1-hydroxy-N'-[(1E)-(5-nitro-2-furyl)methylene]-2-naphthohydrazide	120.65	O=[N+]([O-])c1oc(C=NNC(=O)c2c(O)c3c(cc2)cccc3)cc1	52	2.03	3.3	-0.24
omega_1291769	-9.214	-13.6157	0.373203	5.42104	3.80937	-2.51506	-2.68691	4	CL8342	NC	4	2	F731-0165	6	2-methoxy-N-(11-oxo-10,11-dihydrodibenzo[b,f][1,4]oxazepin-2-yl)benzamide	76.66	O=C(Nc1cc2C(=O)Nc3c(Oc2cc1)cccc3)c1c(OC)cccc1	55	2.95	3.44	-3.16
omega_284784	-9.21361	-9.53149	0.43279	3.67391	4.5797	-5.43907	-2.92946	3	CL6481	DC	7	1	G205-0418	7	N-ethyl-2-(4-methylpiperidino)-5-oxo-5H-[1,3,4]thiadiazolo[3,2-a]pyrimidine-6-carboxamide	102.67	O=C(NCC)C=1C(=O)N2N=C(N3CCC(C)CC3)SC2=NC=1	2	1.28	1.28	-3.69
omega_22600	-9.2133	-10.2588	0.735107	3.91764	4.4277	-4.54172	-3.49326	5	CV0299	DC	5	2	C720-0541	7	2-hydroxy-9-methyl-4-oxo-N-(pyridin-3-ylmethyl)-4H-pyrido[1,2-a]pyrimidine-3-carboxamide	94.89	O=C(NCc1cnccc1)C=1C(=O)N2C(C(C)=CC=C2)=NC=1O	5	-0.62	0.22	-0.92
omega_1321879	-9.21275	-11.2592	0.554302	4.17509	2.99905	-4.24791	-1.43411	4	CL2518	NC	3	1	G586-0292	3	N-benzyl-6-methylthieno[2,3-b]quinoline-2-carboxamide	70.23	O=C(NCc1ccccc1)c1sc2nc3c(cc(C)cc3)cc2c1	392	4.88	4.81	-4.79
omega_124445	-9.21135	-12.774	0.326163	4.17269	5.09747	-3.17671	-2.85697	4	CM0132	DC	6	3	D668-0252	7	N~5~-(3-chlorophenyl)-2-hydroxy-4-methyl-6-oxo-1,6-dihydro-5-pyrimidinesulfonamide	116.24	Clc1cc(NS(=O)(=O)C2=C(C)N=C(O)NC2=O)ccc1	192	0.89	0.671	0.11
omega_124343	-9.21018	-13.1049	0.344312	3.98672	5.29346	-3.13415	-2.59565	4	CM0132	DC	5	3	D668-0045	7	N-(3,5-dimethylphenyl)-2-hydroxy-6-oxo-1,6-dihydropyrimidine-5-sulfonamide	116.24	S(=O)(=O)(Nc1cc(C)cc(C)c1)C=1C(=O)NC(O)=NC=1	194	0.63	0.466	-0.05
omega_798914	-9.20959	-12.4868	0.367601	4.15196	2.55801	-2.59031	-1.21008	3		DC	5	1	8016-8161	5	N~4~-(5-chloro-2-methylphenyl)-1-ethyl-1H-pyrazole-4-sulfonamide	72.37	Clc1cc(NS(=O)(=O)c2cn(CC)nc2)c(C)cc1	31	1.23	1.59	-4.12
omega_103375	-9.20878	-11.5653	0.600588	4.57602	4.19195	-4.25863	-2.75345	3	CL8250	DC	4	2	D433-1563	6	2-(anilinomethyl)-6-(4-chlorobenzyl)-5-methyl[1,2,4]triazolo[1,5-a]pyrimidin-7(4H)-one	71.84	Clc1ccc(CC=2C(=O)n3nc(CNc4ccccc4)nc3NC=2C)cc1	149	2.9	3.6	-2.19
omega_415248	-9.20875	-11.0646	0.480428	3.88521	2.98594	-2.43691	-3.05884	6	CL9808	DC	5	3	3237-1565	5	3-hydroxy-N'-[(1E)-(2-hydroxy-5-methylphenyl)methylene]-1-benzothiophene-2-carbohydrazide	81.92	O=C(NN=Cc1c(O)ccc(C)c1)c1c(O)c2c(s1)cccc2	49	3.06	3.7	-2.92
omega_478959	-9.20844	-9.87936	0.382474	4.35276	4.12509	-3.61342	-4.57599	3		DC	5	2	4789-1595	6	5-methyl-2-furaldehyde (5-chloro-6-oxo-1,6-dihydropyridazin-4-yl)hydrazone	78.99	ClC=1C(=O)NN=CC=1NN=Cc1oc(C)cc1	8	3.21	1.38	-3.27
omega_1468832	-9.20788	-12.6545	0.483889	4.46459	2.92313	-3.29902	-1.12598	5	CL9787	NC	3	1	M626-0009	4	2-bromo-N-[(6-pyrrolidin-1-ylpyridin-3-yl)methyl]benzamide	45.23	Brc1c(C(=O)NCc2cnc(N3CCCC3)cc2)cccc1	9	2.68	3.382	-4.52
omega_284869	-9.20757	-10.1116	0.580393	4.17986	4.71115	-5.44329	-3.12412	6	CL6481	DC	6	1	G205-0649	8	N-(2-cyclohex-1-en-1-ylethyl)-2-morpholin-4-yl-5-oxo-5H-[1,3,4]thiadiazolo[3,2-a]pyrimidine-6-carboxamide	111.9	O=C(NCCC1=CCCCC1)C=1C(=O)N2N=C(N3CCOCC3)SC2=NC=1	21	1.74	2.41	-3.27
omega_1500104	-9.20698	-11.7429	0.482287	4.01996	3.79404	-3.24974	-2.51064	5	CM0615	NC	3	3	P574-0887	6	2-(2-amino-4-methyl-6-oxopyrimidin-1(6H)-yl)-N-(3-ethylphenyl)acetamide	87.79	O=C(Nc1cc(CC)ccc1)CN1C(N)=NC(C)=CC1=O	22	2.491	1.759	0.33
omega_414554	-9.20691	-7.31093	0.777934	4.19482	6.01063	-6.78598	-6.09338	2		DC	7	3	3232-1822	7	1H-indole-3-carbaldehyde 3-(3-oxo-2,3-dihydro-1,2,4-triazin-5-yl)hydrazone	94	O=C1N=C(N/N=C/c2c3c([nH]c2)cccc3)C=NN1	2	1.52	1.52	-3.49
omega_334963	-9.20686	-10.46	0.379314	3.5443	4.79847	-3.7704	-3.69856	4	CL7215	DC	4	2	G751-0010	5	2-{[(5-ethyl-4H-1,2,4-triazol-3-yl)thio]methyl}quinolin-4(1H)-one	95.97	S(CC=1Nc2c(C(=O)C=1)cccc2)c1[nH]c(CC)nn1	46	1.7	2.02	-1.97
omega_913210	-9.20677	-12.5223	0.391986	4.70855	2.25016	-2.17731	-1.8579	4		DC	4	2	Y041-9738	4	N-[2-(1H-imidazol-5-yl)ethyl]-5-(trifluoromethyl)-1-benzothiophene-2-carboxamide	86.02	FC(F)(F)c1cc2c(sc(C(=O)NCCc3[nH]cnc3)c2)cc1	28	1.24	1.59	-3.37
omega_538685	-9.20526	-12.7232	0.346501	4.87144	4.27213	-3.08713	-2.88504	7		DC	4	2	8003-7670	7	N-[2-(benzoylamino)ethyl]-4-nitrobenzamide	104.02	O=[N+]([O-])c1ccc(C(=O)NCCNC(=O)c2ccccc2)cc1	2	2.21	1.79	-2.74
omega_345971	-9.20491	-12.8172	0.553959	5.6162	4.12104	-3.75216	-2.92675	5	CL3451	DC	5	1	G808-0831	7	N-{5-methyl-2-[(2-methyl-7-oxo-7H-isoxazolo[2,3-a]pyrimidin-5-yl)methoxy]phenyl}acetamide	80.23	O=C(Nc1c(OCC=2N=C3N(C(=O)C=2)OC(C)=C3)ccc(C)c1)C	25	0.83	0.84	-1.76
omega_565189	-9.20485	-8.39432	0.269469	2.65404	6.35834	-5.12289	-4.96948	4		DC	8	6	8009-2019	8	3-({[(5-amino-1H-1,2,4-triazol-3-yl)sulfanyl]methyl}sulfanyl)-1H-1,2,4-triazol-5-amine	185.78	S(CSc1nc(N)[nH]n1)c1nc(N)[nH]n1	58	-0.72243	1.01	-1.13394
omega_541128	-9.20361	-12.0206	0.498776	5.90505	3.77895	-3.16466	-4.20109	6		DC	6	5	8004-1918	6	4-({[4-(5-amino-1H-1,3-benzimidazol-2-yl)phenyl]imino}methyl)-1,3-benzenediol	107.52	Oc1c(/C=N/c2ccc(-c3[nH]c4c(n3)cc(N)cc4)cc2)ccc(O)c1	3	1.57	1.66	-3.62
omega_720200	-9.20171	-10.3416	0.739898	4.49097	5.72137	-6.15319	-3.65918	5		DC	6	2	H024-0126	6	N~1~-(2-pyridylmethyl)-2-{5-[3-(trifluoromethyl)phenyl]-4H-1,2,4-triazol-3-yl}acetamide	83.56	FC(F)(F)c1cc(-c2[nH]c(CC(=O)NCc3ncccc3)nn2)ccc1	101	2.48444	0.66	-2.6777
omega_1009751	-9.20089	-13.0222	0.671138	5.87042	3.88046	-3.71421	-2.88651	4	CM3760	IC	6	3	S690-0059	6	4-{[1-(1H-indazol-3-ylcarbonyl)-4-piperidyl]methyl}benzamide	92.08	O=C(N)c1ccc(CC2CCN(C(=O)c3n[nH]c4c3cccc4)CC2)cc1	13	3.06	3.06	-4.73
omega_913073	-9.2003	-11.47	0.486358	5.1499	5.13738	-4.13919	-4.36474	2		DC	7	3	Y041-9035	7	3-[2-oxo-2-(1,3,4,9-tetrahydro-2H-beta-carbolin-2-yl)ethyl]-3,4-dihydro-1H-1,4-benzodiazepine-2,5-dione	94.3	O=C(CC1C(=O)Nc2c(C(=O)N1)cccc2)N1Cc2[nH]c3c(c2CC1)cccc3	23	1.78	1.78	-3.5
omega_320221	-9.19953	-11.2676	0.605443	4.29422	2.99905	-4.32251	-1.50816	4	CL2518	DC	4	1	G586-0208	3	N-(4-chlorobenzyl)-6-methylthieno[2,3-b]quinoline-2-carboxamide	70.23	Clc1ccc(CNC(=O)c2sc3nc4c(cc(C)cc4)cc3c2)cc1	502	6.17	5.48	-6.89
omega_124375	-9.19873	-9.75051	0.382081	3.77731	5.48591	-5.01895	-4.07457	5	CM0132	DC	7	3	D668-0093	8	N-(5-chloro-2-methoxyphenyl)-2-hydroxy-6-oxo-1,6-dihydro-5-pyrimidinesulfonamide	125.47	Clc1cc(NS(=O)(=O)C=2C(=O)NC(O)=NC=2)c(OC)cc1	138	-0.01	0.141	1.49
omega_1500400	-9.19873	-11.4914	0.487343	3.71746	4.31361	-3.74142	-2.48438	6	CM0615	NC	5	3	P574-4689	7	2-[2-amino-4-(methoxymethyl)-6-oxo-1(6H)-pyrimidinyl]-N~1~-(4-chlorophenyl)acetamide	97.02	Clc1ccc(NC(=O)CN2C(N)=NC(COC)=CC2=O)cc1	41	1.235	1.001	-1.72
omega_669306	-9.19851	-12.6124	0.257489	4.58791	3.25073	-2.63713	-2.04511	7	CL2077	DC	5	2	C279-0863	6	N-[2-(7-methoxy-2-oxo-1,2-dihydroquinolin-3-yl)ethyl]propane-1-sulfonamide	84.5	[S+]([O+H2])(=O)(NCCC=1C(=O)Nc2c(ccc(OC)c2)C=1)CCC	35	3.37	1.31	-7.4
omega_519906	-9.19793	-11.1429	0.478431	4.59048	2.83619	-3.30243	-2.65766	3	CL1059	DC	4	1	6834-0357	5	6-{[(4-chlorophenyl)amino]methyl}-5H-pyrrolo[3,4-b]pyridine-5,7(6H)-dione	62.3	Clc1ccc(NCN2C(=O)c3ncccc3C2=O)cc1	145	0.81	2.49	-0.39
omega_415245	-9.19761	-11.5269	0.381796	4.51115	3.05932	-1.97834	-3.64461	6	CL9808	DC	6	3	3237-1558	5	N'-[(1E)-(5-chloro-2-hydroxyphenyl)methylene]-3-hydroxy-1-benzothiophene-2-carbohydrazide	81.92	Clc1cc(C=NNC(=O)c2c(O)c3c(s2)cccc3)c(O)cc1	122	3.06	3.88	-1.87
omega_495921	-9.19723	-12.0006	0.458137	4.93908	2.83389	-3.49317	-1.93461	4	CL4729	DC	2	1	5638-0270	4	6-benzyl-2-(4-tert-butylphenyl)-5-methylpyrazolo[1,5-a]pyrimidin-7(4H)-one	46.92	O=C1C(Cc2ccccc2)=C(C)Nc2n1nc(-c1ccc(C(C)(C)C)cc1)c2	99	4.77	5.55	-4.6
omega_22629	-9.19482	-9.11518	0.661557	3.54449	4.97381	-4.4584	-4.8011	6	CV0299	DC	5	3	C720-0580	7	2-hydroxy-N-(2-hydroxypropyl)-8-methyl-4-oxo-4H-pyrido[1,2-a]pyrimidine-3-carboxamide	102.23	O=C(NCC(O)C)C=1C(=O)N2C(=NC=1O)C=C(C)C=C2	54	-1.53	-0.48	-0.4
omega_940525	-9.19383	-7.6019	0.277007	2.61219	3.5183	-5.02428	-2.97515	2		DC	4	1	8017-3533	4	5-(3-chlorobenzyl)-2H-1,2,3,4-tetraazole	54.46	Clc1cc(Cc2n[nH]nn2)ccc1	31	0.0463	1.92	-2.76
omega_289834	-9.19343	-12.7701	0.506523	5.603	3.39565	-3.84787	-2.08065	5	CL6659	DC	6	0	G265-0081	6	(2-isopropyl-5-oxo-5H-[1,3,4]thiadiazolo[3,2-a]pyrimidin-7-yl)methyl 2-methylbenzoate	96.63	O=C(OCC=1N=C2SC(C(C)C)=NN2C(=O)C=1)c1c(C)cccc1	69	2.17	3.68	-2.51
omega_128682	-9.19322	-13.4685	0.57602	5.65161	3.69325	-3.5902	-2.05538	4		DC	4	1	D718-0285	5	2-(ethylthio)-5-methyl-6-(1-naphthylmethyl)[1,2,4]triazolo[1,5-a]pyrimidin-7(4H)-one	85.11	S(CC)c1nn2C(=O)C(Cc3c4c(ccc3)cccc4)=C(C)Nc2n1	43	2.171	4.256	-3.9
omega_1513870	-9.18992	-12.7334	0.568192	5.56518	5.18729	-4.09534	-3.68182	1	CM1524	NC	3	1	S021-0120	7	6-(1H-indol-6-ylcarbonyl)-5,6,7,8-tetrahydropyrazolo[1,5-a]pyrido[3,4-d]pyrimidin-9(1H)-one	74.24	FC(F)(F)Oc1ccc(CC(=O)N2CC=3N=C4N(C(=O)C=3CC2)NC=C4)cc1	55	0.38976	1.79	-5.0167
omega_747131	-9.18991	-13.2163	0.943306	7.38916	5.33194	-5.60618	-4.03188	7	CL4907	DC	5	3	K284-7832	8	2-anilino-N-[2-(1H-indol-3-yl)ethyl]-5-oxo-5H-[1,3,4]thiadiazolo[2,3-b]quinazoline-8-carboxamide	127.25	O=C(NCCc1c2c([nH]c1)cccc2)c1cc2N=C3SC(Nc4ccccc4)=NN3C(=O)c2cc1	20	4.24	4.69	-4.78
omega_690161	-9.18795	-9.60704	0.290861	3.73963	3.86487	-3.60176	-3.87451	4	CL2811	DC	4	2	C455-0082	5	N-(4-methylbenzyl)-1H-imidazole-4-sulfonamide	83.23	[SH0]([O+H]c1nc[nH]c1)([O-])=NCc1ccc(C)cc1	5	1.62	0.68	-2.03
omega_1384240	-9.18738	-13.4621	0.669841	6.34057	3.27383	-3.23525	-2.77423	7	CL8572A	NC	4	1	L326-0681	5	N-(4-chlorophenethyl)-1-(5-phenyl-2-pyrimidinyl)-4-piperidinecarboxamide	58.12	Clc1ccc(CCNC(=O)C2CCN(c3ncc(-c4ccccc4)cn3)CC2)cc1	71	4.08	4.5	-4.9
omega_661583	-9.18707	-11.2874	0.686971	4.602	3.47637	-4.69429	-1.97072	4	CL2007	DC	4	1	C243-0121	5	4-oxo-N-(1-phenylethyl)-4H-pyrido[1,2-a]thieno[2,3-d]pyrimidine-2-carboxamide	61.77	O=C(NC(C)c1ccccc1)c1sc2N=C3N(C(=O)c2c1)C=CC=C3	130	-0.22	2.66	-0.05
omega_124336	-9.18706	-8.38802	0.424375	3.0734	5.27308	-5.27465	-4.29525	4	CM0132	DC	5	3	D668-0036	7	2-hydroxy-N-(2-methylphenyl)-6-oxo-1,6-dihydropyrimidine-5-sulfonamide	116.24	S(=O)(=O)(Nc1c(C)cccc1)C=1C(=O)NC(O)=NC=1	192	-0.13	-0.021	0.6
omega_103380	-9.18569	-11.6366	0.564977	4.54077	4.19137	-4.17544	-2.67073	3	CL8250	DC	5	2	D433-1569	6	6-(4-chlorobenzyl)-2-{[(2-fluorophenyl)amino]methyl}-5-methyl[1,2,4]triazolo[1,5-a]pyrimidin-7(4H)-one	71.84	Clc1ccc(CC=2C(=O)n3nc(CNc4c(F)cccc4)nc3NC=2C)cc1	184	3.24	3.81	-3.94
omega_369172	-9.18534	-9.59236	0.521529	3.00835	4.19124	-4.3442	-2.9699	8		DC	5	3	1548-0612	7	N-(2-{2-[(E)-1-(2-furyl)methylidene]hydrazino}-2-oxoethyl)-2-hydroxybenzamide	103.93	O=C(NN=Cc1occc1)CNC(=O)c1c(O)cccc1	3	1.22	0.88	1.18
omega_865857	-9.18445	-11.7929	0.556023	4.31861	5.45521	-4.68153	-3.0399	2	CL2120	DC	6	3	Y020-1324	6	N-[4-amino-6-(1-benzofuran-2-yl)-1,3,5-triazin-2-yl]-N-(3-chloro-2-methylphenyl)amine	89.86	Clc1c(C)c(Nc2nc(N)nc(-c3oc4c(c3)cccc4)n2)ccc1	34	4.3278	5.02	-4.0293
omega_1047489	-9.18357	-13.7435	0.391856	4.44012	3.33699	-1.93212	-1.67696	4	CM5185	IC	6	1	SA24-1132	6	{3-[(2S)-4,4-difluoro-2-(hydroxymethyl)tetrahydro-1H-pyrrol-1-yl]-1-azetanyl}(3-methyl-5-isoxazolyl)methanone	69.81	FC1(F)CN([C@H](CO)C1)C1CN(C(=O)c2onc(C)c2)C1	47	-2.42	-2.42	0.29
omega_1464606	-9.18351	-11.9073	0.470301	4.00902	4.84813	-3.92419	-2.67951	2	CL7308	NC	2	3	M503-1179	7	4-amino-N~5~-benzyl-2-morpholino-5-pyrimidinecarboxamide	93.37	O=C(NCc1ccccc1)c1c(N)nc(N2CCOCC2)nc1	76	-0.261217	0.195	1.36801
omega_373495	-9.18319	-12.483	0.474276	4.90707	4.72456	-3.39433	-3.41179	7	CL1721	DC	4	2	1683-5074	6	N-[2-(1H-Benzoimidazol-2-yl)-ethyl]-3,4-dimethoxy-benzamide	76.24	O=C(NCCc1[nH]c2c(n1)cccc2)c1cc(OC)c(OC)cc1	5	2.24	2.55	-3.37
omega_357140	-9.18292	-11.6798	0.289583	4.34334	2.65732	-3.31516	-1.47824	2		DC	3	1	0703-6415	3	N~3~-(2,6-dichlorophenyl)nicotinamide	41.99	Clc1c(NC(=O)c2cnccc2)c(Cl)ccc1	1	2.49711	1.49	-2.02008
omega_653207	-9.18149	-10.2548	0.339811	3.21408	3.65623	-4.17056	-1.96624	2		DC	4	3	C201-0938	5	3-amino-N-(4-fluorobenzyl)pyrazine-2-carboxamide	80.9	Fc1ccc(CNC(=O)c2c(N)nccn2)cc1	32	0.19	0.747	-0.88
omega_423667	-9.18107	-9.40974	0.368552	3.9558	4.08928	-5.27379	-2.91117	5		DC	5	2	3284-1564	5	2-(3-chloroanilino)-N'~1~-[(E)-1-(2-pyridyl)methylidene]acetohydrazide	66.38	Clc1cc(NCC(=O)N/N=C/c2ncccc2)ccc1	8	2.81433	3.22	-2.70446
omega_284727	-9.18094	-9.1064	0.519316	3.52722	4.5781	-5.64876	-3.05042	4	CL6481	DC	5	1	G205-0113	7	N-cyclopropyl-5-oxo-2-piperidin-1-yl-5H-[1,3,4]thiadiazolo[3,2-a]pyrimidine-6-carboxamide	102.67	O=C(NC1CC1)C=1C(=O)N2N=C(N3CCCCC3)SC2=NC=1	33	2.53	1.8	-1.42
omega_522995	-9.18088	-10.4859	0.540592	4.51492	5.04495	-5.2962	-3.49924	4		DC	7	2	7182-0038	6	6-{(E)-2-[3-(4-methoxyphenyl)-1H-pyrazol-4-yl]vinyl}-4-(trifluoromethyl)pyrimidin-2(1H)-one	79.37	FC(F)(F)C1=NC(=O)NC(C=Cc2c(-c3ccc(OC)cc3)n[nH]c2)=C1	3	3.43	2.65	-2.51
omega_22681	-9.18042	-10.4401	0.547953	3.54473	4.9567	-4.04414	-3.74552	9	CV0299	DC	6	3	C720-0645	8	2-hydroxy-N-[2-(2-hydroxyethoxy)ethyl]-4-oxo-4H-pyrido[1,2-a]pyrimidine-3-carboxamide	111.46	O=C(NCCOCCO)C=1C(=O)N2C(=NC=1O)C=CC=C2	45	-2.7	-1.43	-2.37
omega_1291812	-9.18028	-13.3704	0.441259	4.86199	3.49931	-2.22063	-2.39182	3	CL8342	NC	3	2	F731-0265	5	3-methyl-N-(8-methyl-11-oxo-10,11-dihydrodibenzo[b,f][1,4]oxazepin-2-yl)benzamide	67.43	O=C(Nc1cc2C(=O)Nc3c(Oc2cc1)ccc(C)c3)c1cc(C)ccc1	105	2.77	4.16	-3.96
omega_519907	-9.17903	-11.1635	0.462851	4.59155	2.81537	-3.17137	-2.71389	3	CL1059	DC	4	1	6834-0358	5	6-{[(4-bromophenyl)amino]methyl}-5H-pyrrolo[3,4-b]pyridine-5,7(6H)-dione	62.3	Brc1ccc(NCN2C(=O)c3ncccc3C2=O)cc1	197	0.8	2.57	-1.22
omega_532050	-9.17852	-8.42094	0.299767	3.60462	4.04808	-5.49324	-3.21681	2		DC	6	1	8001-9067	6	4-nitro-5-phenyl-2H-1,2,3-triazole	87.39	O=[N+]([O-])c1c(-c2ccccc2)n[nH]n1	28	-0.43	1.48	-2.62
omega_644124	-9.17761	-12.3551	0.406668	5.43402	2.99905	-3.26582	-2.39643	6	CL2461	DC	2	2	C156-0208	3	2,2-dimethyl-N-{2-[(2-methyl-1H-indol-3-yl)thio]ethyl}propanamide	70.19	S(CCNC(=O)C(C)(C)C)c1c(C)[nH]c2c1cccc2	1	5.04	3.55	-5.94
omega_124345	-9.17602	-9.38412	0.322647	3.93086	5.21387	-5.35827	-3.901	5	CM0132	DC	5	3	D668-0047	7	N-(4-ethylphenyl)-2-hydroxy-6-oxo-1,6-dihydropyrimidine-5-sulfonamide	116.24	S(=O)(=O)(Nc1ccc(CC)cc1)C=1C(=O)NC(O)=NC=1	201	0.31	0.436	-0.62
omega_304900	-9.17438	-12.1014	0.394007	4.00955	3.11827	-3.21268	-1.38213	4	CL6285	DC	5	1	G408-0439	6	N-(2,3-dimethylphenyl)-5-(3-methylisoxazol-5-yl)furan-2-sulfonamide	93.72	[SH0]([O+H]c1oc(-c2onc(C)c2)cc1)([O-])=Nc1c(C)c(C)ccc1	179	3.4	3.36	-5.37
omega_714581	-9.17053	-10.1862	0.586452	3.58758	3.77476	-3.93459	-2.99852	5	CL2813A	DC	4	1	G896-0154	5	5-oxo-N-(2-phenylpropyl)-5H-[1,3]thiazolo[3,2-a]pyrimidine-6-carboxamide	87.07	O=C(NCC(C)c1ccccc1)C=1C(=O)N2C(SC=C2)=NC=1	7	2.06	1.27	-1.87
omega_535116	-9.17046	-12.0977	0.35446	4.57672	2.96275	-2.86137	-2.10531	6		DC	3	2	8003-0929	4	2-(2-naphthylamino)-N'~1~-[(E)-1-(2-thienyl)methylidene]acetohydrazide	81.73	O=C(NN=Cc1sccc1)CNc1cc2c(cc1)cccc2	49	3.32	3.26	-2.86
omega_595135	-9.17033	-13.5862	0.398622	5.62258	2.74466	-3.12737	-1.2226	2		DC	3	1	8014-9308	3	2,5-dichloro-N~3~-(2,5-dimethylphenyl)-4,6-dimethylnicotinamide	41.99	Clc1c(C)c(C(=O)Nc2c(C)ccc(C)c2)c(Cl)nc1C	41	4.404	3.91	-6.1749
omega_41601	-9.1699	-13.4642	0.497051	6.21092	3.59218	-4.38591	-1.61996	6	CL4403A	DC	3	1	C999-0223	5	N-benzyl-2-(5,7-dimethyl-2-phenylpyrazolo[1,5-a]pyrimidin-6-yl)acetamide	59.29	O=C(NCc1ccccc1)CC1=C(C)n2nc(-c3ccccc3)cc2N=C1C	176	4.89	3.7	-3.82
omega_1500266	-9.16865	-11.043	0.324674	3.82842	4.11754	-3.95385	-2.4424	5	CM0615A	NC	3	3	P574-2735	6	2-(2-amino-4-methyl-6-oxopyrimidin-1(6H)-yl)-N-(4-methylbenzyl)acetamide	87.79	O=C(NCc1ccc(C)cc1)CN1C(N)=NC(C)=CC1=O	34	2.096	1.31	0.17
omega_359467	-9.16766	-12.8364	0.328589	4.21803	6.39147	-3.13548	-4.13389	6	CL1273	DC	8	3	0871-0019	10	3-{[(2-hydroxy-5-nitrophenyl)amino]carbonyl}pyrazine-2-carboxylic acid	158.23	O=[N+]([O-])c1cc(NC(=O)c2c(C(=O)O)nccn2)c(O)cc1	8	-0.49	0.4	1.78
omega_375794	-9.16765	-12.0916	0.388209	5.14527	3.73711	-3.501	-2.84564	6		DC	3	2	1761-0242	5	N'-[(Z)-1-(3-pyridyl)methylidene]-2-(3-toluidino)acetohydrazide	66.38	O=C(NN=Cc1cnccc1)CNc1cc(C)ccc1	95	1.75	1.4	-1.23
omega_732632	-9.16553	-13.1072	0.546251	5.0453	4.61935	-4.23132	-2.03796	0		DC	1	1	K017-0092	6	(3Z)-5-bromo-1H-indole-2,3-dione 3-[methyl(quinoxalin-2-yl)hydrazone]	70.48	Brc1cc2C(=NN(C)c3nc4c(nc3)cccc4)C(=O)Nc2cc1	99	2.38	3.68	-3.52
omega_526966	-9.16533	-12.7585	0.32389	4.36598	3.61065	-2.81177	-1.89553	1		DC	5	2	7591-0514	5	2-methyl-4-[(4-methylpyridin-2-yl)amino]-5-oxo-4-(trifluoromethyl)-4,5-dihydro-1H-pyrrole-3-carbonitrile	77.81	FC(F)(F)C1(Nc2nccc(C)c2)C(C#N)=C(C)NC1=O	40	1.34	2.69	0
omega_22658	-9.16287	-9.42647	0.713572	3.48049	4.35554	-4.63872	-3.64728	7	CV0299	DC	5	2	C720-0618	7	N-[3-(dimethylamino)propyl]-2-hydroxy-8-methyl-4-oxo-4H-pyrido[1,2-a]pyrimidine-3-carboxamide	85.24	O=C(NCCCN(C)C)C=1C(=O)N2C(=NC=1O)C=C(C)C=C2	5	-1.15	-0.12	0.42
omega_920728	-9.1626	-10.5832	0.284872	3.36758	4.54269	-2.45029	-4.32429	7		DC	6	5	Y043-8421	6	(2S)-2-[(2-aminoacetyl)amino]-3-(4-hydroxyphenyl)propanoic acid	112.65	O=C(O)[C@@H](NC(=O)CN)Cc1ccc(O)cc1	30	-4.73	-1.98	0.0859
omega_1500213	-9.161	-11.5623	0.538891	4.12761	3.69279	-3.33541	-2.62261	5	CM0615	NC	3	3	P574-1369	6	2-(2-amino-4-ethyl-6-oxopyrimidin-1(6H)-yl)-N-(3,4-dimethylphenyl)acetamide	87.79	O=C(Nc1cc(C)c(C)cc1)CN1C(N)=NC(CC)=CC1=O	123	2.374	2.313	-0.06
omega_455019	-9.1598	-12.7262	0.345025	5.23518	3.03739	-2.87963	-2.17154	6	CL2436	DC	6	2	4151-0476	6	2-(4,6-Dihydroxy-pyrimidin-2-ylsulfanyl)-1-(2,3-dimethyl-indol-1-yl)-ethanone	88.24	S(CC(=O)n1c(C)c(C)c2c1cccc2)c1nc(O)cc(O)n1	2	0.89	4.09	-1.66
omega_285096	-9.1596	-9.79824	0.40733	3.71346	4.59359	-4.95974	-3.11599	4	CL6481	DC	5	1	G205-2314	7	N-isopropyl-2-(3-methylpiperidin-1-yl)-5-oxo-5H-[1,3,4]thiadiazolo[3,2-a]pyrimidine-6-carboxamide	102.67	O=C(NC(C)C)C=1C(=O)N2N=C(N3CC(C)CCC3)SC2=NC=1	5	2.8	2.36	-1.39
omega_415240	-9.15851	-13.3232	0.239651	5.19138	2.55332	-1.56358	-2.25607	6		DC	4	2	3237-1542	5	N'-[(1E)-(2-hydroxy-4-methylphenyl)methylene]-6-methoxy-2-naphthohydrazide	70.92	O=C(NN=Cc1c(O)cc(C)cc1)c1cc2c(cc(OC)cc2)cc1	45	4.16	3.79	-3.55
omega_1372979	-9.1555	-12.924	0.376778	4.38402	2.91762	-2.58648	-1.32347	6	CL8526	NC	6	1	L228-0521	6	N-(4-cyanophenyl)-5-(2-cyclopropyl-1,3-oxazol-5-yl)-2-thiophenesulfonamide	132.61	[SH0]([O+H]c1sc(-c2oc(C3CC3)nc2)cc1)([O-])=Nc1ccc(C#N)cc1	178	3.3	3.19	-5.43
omega_21095	-9.15542	-11.9692	0.531336	5.97824	2.35971	-3.31185	-2.74365	5	CL3521	DC	4	0	C712-1108	4	N-methyl-N-(2-pyridin-2-ylethyl)-4H-thieno[3,2-c]chromene-2-carboxamide	70.67	O=C(N(CCc1ncccc1)C)c1sc2-c3c(OCc2c1)cccc3	1	2.95	3.55	-2.5
omega_22678	-9.15532	-8.90243	0.579776	3.24566	4.80766	-4.52872	-4.35727	6	CV0299	DC	5	3	C720-0642	7	2-hydroxy-N-(2-hydroxypropyl)-4-oxo-4H-pyrido[1,2-a]pyrimidine-3-carboxamide	102.23	O=C(NCC(O)C)C=1C(=O)N2C(=NC=1O)C=CC=C2	18	-1.95	-0.93	1.13
omega_1472603	-9.15532	-12.5639	0.391681	5.49673	1.84212	-2.30527	-2.01668	7	CL9905	NC	4	1	M769-1107	6	2-[4-(4-chlorophenyl)piperazin-1-yl]-N-(2-thienylmethyl)-1,3-thiazole-4-carboxamide	75.02	O=C(N(CCc1nc(-c2c(C)c3c([nH]2)ccc(C)c3)on1)C)CCC	115	2.39	3.675	-4.69
omega_1475689	-9.15514	-11.2377	0.492533	3.95389	4.54679	-5.76199	-1.14866	4	CM0005	NC	8	0	M876-1168	7	2-(5-{[5-(3-fluoro-4-methylphenyl)-1,3,4-oxadiazol-2-yl]methyl}-1,2,4-oxadiazol-3-yl)pyridine	90.73	Fc1c(C)ccc(-c2oc(Cc3onc(-c4ncccc4)n3)nn2)c1	60	0.337	2.855	-2.41
omega_612100	-9.15498	-11.6212	0.356329	4.33722	3.48239	-3.10689	-2.60286	3		DC	5	1	8018-5650	5	6-benzyl-5-methyl[1,2,4]triazolo[1,5-a]pyrimidin-7-ol	63.31	OC1=C(Cc2ccccc2)C(C)=Nc2n1ncn2	60	-2.75	-0.0641	-1.91
omega_1505565	-9.15496	-13.8178	0.363911	5.01454	3.23605	-3.23724	-0.714384	6	CM0906	NC	7	0	P668-0087	6	4-(4-{[5-(3-fluorobenzyl)-1,2,4-oxadiazol-3-yl]methyl}-5-methyl-1,3-oxazol-2-yl)phenyl methyl ether	74.18	Fc1cc(Cc2onc(Cc3c(C)oc(-c4ccc(OC)cc4)n3)n2)ccc1	18	4.942	3.8	-5.96
omega_22431	-9.15493	-11.0332	0.62536	4.04	4.29339	-4.71996	-2.36048	5	CL3531	DC	4	1	C720-0004	6	N-(4-methoxybenzyl)-4-oxo-4H-pyrido[1,2-a]pyrimidine-3-carboxamide	71	O=C(NCc1ccc(OC)cc1)C=1C(=O)N2C(=NC=1)C=CC=C2	1	1.77	0.39	-2.82
omega_87112	-9.15454	-12.7701	0.6032	5.42447	4.88339	-4.28459	-3.01087	6	CL7372	DC	6	2	D351-0193	8	5-{[(5-chloro-2-methoxyphenyl)amino]methyl}-2-(4-methoxyphenyl)[1,2,4]triazolo[1,5-a]pyrimidin-7(4H)-one	90.3	Clc1cc(NCC=2Nc3n(C(=O)C=2)nc(-c2ccc(OC)cc2)n3)c(OC)cc1	127	1.42	2.98	-2.26
omega_1533304	-9.15398	-9.04881	0.439262	3.8359	4.27653	-4.35131	-4.30556	4	CL7481	NC	3	2	Z606-2074	5	N~5~-isobutyl-1H-1,2,3-benzotriazole-5-carboxamide	70.67	O=C(NCC(C)C)c1cc2nn[nH]c2cc1	52	0.358	1.835	-0.53
omega_22640	-9.15306	-11.4774	0.820436	4.60283	5.26414	-4.81429	-3.5488	5	CV0299	DC	6	2	C720-0598	8	N-(1,3-benzodioxol-5-ylmethyl)-2-hydroxy-8-methyl-4-oxo-4H-pyrido[1,2-a]pyrimidine-3-carboxamide	100.46	O=C(NCc1cc2OCOc2cc1)C=1C(=O)N2C(=NC=1O)C=C(C)C=C2	52	0.1	1.03	-0.95
omega_87037	-9.15237	-12.3257	0.600321	5.42118	4.23596	-4.07489	-3.0092	4	CL7372	DC	3	2	D351-0044	6	5-{[(3,4-dimethylphenyl)amino]methyl}-2-phenyl[1,2,4]triazolo[1,5-a]pyrimidin-7(4H)-one	71.84	O=C1n2nc(-c3ccccc3)nc2NC(CNc2cc(C)c(C)cc2)=C1	151	0.58	3.32	-2.44
omega_797057	-9.15197	-8.96297	0.598846	4.56825	4.53393	-5.59391	-4.2961	2	CL8338	DC	8	2	P666-0065	8	N-(4-methoxybenzyl)-1-oxo-1,2-dihydropyrrolo[1,2-d][1,2,4]triazine-7-sulfonamide	110.17	S(=O)(=O)(NCc1ccc(OC)cc1)c1cn2c(C(=O)NN=C2)c1	50	-0.35	-0.35	-2.84
omega_671867	-9.15174	-10.0087	0.196994	3.70913	3.19177	-4.14531	-2.09562	3	CL4136	DC	5	2	C301-2263	5	5-(4-fluorobenzyl)-1,3,4-oxadiazole-2-carboxamide	82.01	Fc1ccc(Cc2oc(C(=O)N)nn2)cc1	1	1.09	1.09	-2.39
omega_275428	-9.1509	-8.93839	0.228257	3.4155	3.29802	-4.14645	-3.00784	1		DC	4	1	FF20-1493	4	5-piperidino-3(2H)-pyridazinone	44.7	O=C1NN=CC(N2CCCCC2)=C1	495	0.32	0.32	-1.65
omega_335012	-9.15082	-10.1751	0.343384	3.31815	4.79454	-3.8907	-3.54111	3	CL7215	DC	4	2	G751-0516	5	6-methyl-2-{[(5-methyl-4H-1,2,4-triazol-3-yl)thio]methyl}quinolin-4(1H)-one	95.97	S(CC=1Nc2c(C(=O)C=1)cc(C)cc2)c1[nH]c(C)nn1	103	1.36	1.84	-1.4
omega_610054	-9.14967	-12.5432	0.245518	4.56633	3.805	-3.11766	-2.10566	3		DC	8	4	8018-2583	8	2-amino-5-cyano-6-{[(2,6-dioxo-1,2,3,6-tetrahydro-4-pyrimidinyl)methyl]sulfanyl}-3-pyridyl cyanide	169.99	S(CC=1NC(=O)NC(=O)C=1)c1c(C#N)cc(C#N)c(N)n1	9	-1.76893	-0.67	-0.066661
omega_181954	-9.14936	-13.4008	0.644924	5.75133	4.53221	-4.06726	-2.60974	4	CL5991	DC	3	2	E947-0246	7	N~5~-[2-(1H-indol-3-yl)ethyl]-3,6-dimethyl-4-oxo-3,4-dihydrofuro[2,3-d]pyrimidine-5-carboxamide	90.7	O=C(NCCc1c2c([nH]c1)cccc2)c1c(C)oc2N=CN(C)C(=O)c12	129	-0.256431	1.311	-2.11936
omega_47038	-9.14889	-11.7076	0.422608	4.3748	3.70935	-3.92991	-2.01811	5	CL2653	DC	3	1	D043-0117	5	6-benzyl-5-methyl-2-(2-phenylethyl)[1,2,4]triazolo[1,5-a]pyrimidin-7(4H)-one	59.81	O=C1C(Cc2ccccc2)=C(C)Nc2n1nc(CCc1ccccc1)n2	35	2.49	4.05	-2.59
omega_32888	-9.14836	-13.9854	0.368494	5.69648	2.50065	-1.48373	-2.24487	5		DC	5	1	C800-0066	6	2-[5-(4-chlorobenzyl)-4-oxo-4,5-dihydro-3H-pyridazino[4,5-b]indol-3-yl]acetic acid	74.9	Clc1ccc(Cn2c3c(c4c2C(=O)N(CC(=O)O)N=C4)cccc3)cc1	29	0.34	3.55	-1.4
omega_394890	-9.14751	-10.538	0.398366	4.25725	4.90583	-5.51468	-2.65631	5		DC	4	2	2323-2172	6	3-(4-methylphenyl)-N'~5~-[(E)-1-(2-pyridyl)methylidene]-1H-pyrazole-5-carbohydrazide	83.03	O=C(N/N=C/c1ncccc1)c1[nH]nc(-c2ccc(C)cc2)c1	2	2.09	3.69	-2.36
omega_1212210	-9.1471	-11.6143	0.454006	4.55685	3.07907	-3.52586	-2.09686	3		NC	5	1	8539-0736	5	(5-chloro-2-hydroxyphenyl)[2-(4-methylphenyl)pyrazolo[1,5-a]pyrimidin-6-yl]methanone	67.49	Clc1cc(C(=O)C2=Cn3nc(-c4ccc(C)cc4)cc3N=C2)c(O)cc1	19	4.19	4.73	-5.43
omega_103332	-9.14642	-12.2422	0.54901	4.8968	4.67415	-4.29481	-2.72934	3	CL8250	DC	4	2	D433-1482	7	6-benzyl-2-{[(4-methoxyphenyl)amino]methyl}-5-methyl[1,2,4]triazolo[1,5-a]pyrimidin-7(4H)-one	81.07	O(C)c1ccc(NCc2nn3C(=O)C(Cc4ccccc4)=C(C)Nc3n2)cc1	223	1.74	2.92	-3.15
omega_556602	-9.14583	-13.4286	0.474787	5.27976	2.67973	-2.94583	-1.2057	5	CL2341	DC	4	3	8007-4954	4	2-[(6-amino-1,3-benzothiazol-2-yl)sulfanyl]-N~1~-mesitylpropanamide	121.55	S(C(C(=O)Nc1c(C)cc(C)cc1C)C)c1sc2c(n1)ccc(N)c2	34	3.8	5.16	-3.1
omega_124338	-9.1451	-8.51943	0.39758	3.61425	5.28982	-5.45878	-4.46854	4	CM0132	DC	5	3	D668-0038	7	2-hydroxy-N-(4-methylphenyl)-6-oxo-1,6-dihydropyrimidine-5-sulfonamide	116.24	S(=O)(=O)(Nc1ccc(C)cc1)C=1C(=O)NC(O)=NC=1	198	0.09	-0.021	0.22
omega_865966	-9.14437	-11.6152	0.57051	4.26803	5.44486	-4.72691	-3.08566	2	CL2120	DC	6	3	Y020-1440	6	N-[4-amino-6-(1-benzofuran-2-yl)-1,3,5-triazin-2-yl]-N-(2,3-dichlorophenyl)amine	89.86	Clc1c(Cl)cccc1Nc1nc(N)nc(-c2oc3c(c2)cccc3)n1	42	3.7968	5.27	-4.9212
omega_124452	-9.14322	-9.66307	0.459145	4.27445	5.19651	-5.46392	-3.94632	4	CM0132	DC	7	3	D668-0263	7	N-(2,4-dichlorophenyl)-2-hydroxy-4-methyl-6-oxo-1,6-dihydropyrimidine-5-sulfonamide	116.24	Clc1c(NS(=O)(=O)C2=C(C)N=C(O)NC2=O)ccc(Cl)c1	202	1.36	1.336	-1.14
omega_910573	-9.13941	-13.5128	0.370715	5.67932	3.9531	-2.73603	-2.89369	7		DC	5	3	Y041-6079	5	2-[5-(4-chlorophenyl)-3-methyl-1H-pyrazol-4-yl]-N-(4-hydroxyphenethyl)acetamide	78.01	Clc1ccc(-c2c(CC(=O)NCCc3ccc(O)cc3)c(C)n[nH]2)cc1	17	4.5	4.5	-5.6
omega_1004645	-9.13869	-10.4599	0.345104	4.18477	4.17509	-4.02864	-3.35514	2	CM4193	IC	6	1	S636-0324	6	7-(2,3-dihydro-1-benzofuran-5-ylmethyl)-2,5,6,7,8,9-hexahydro-3H-[1,2,4]triazolo[4,3-d][1,4]diazepin-3-one	57.17	O=C1N2C(=NN1)CCN(Cc1cc3c(OCC3)cc1)CC2	1	0.31	0.88	-3.14
omega_22701	-9.13654	-12.8164	0.568623	4.55156	4.77247	-3.73798	-2.47483	7	CV0299	DC	5	2	C720-0673	7	2-hydroxy-N-[2-(3-methoxyphenyl)ethyl]-4-oxo-4H-pyrido[1,2-a]pyrimidine-3-carboxamide	91.23	O=C(NCCc1cc(OC)ccc1)C=1C(=O)N2C(=NC=1O)C=CC=C2	13	0.65	1.13	-1.69
omega_124512	-9.13589	-10.2196	0.565936	5.01289	5.30958	-5.62935	-4.17532	6	CM0132	DC	5	3	D668-0339	7	N-(2,6-diethylphenyl)-2-hydroxy-4-methyl-6-oxo-1,6-dihydropyrimidine-5-sulfonamide	116.24	S(=O)(=O)(Nc1c(CC)cccc1CC)C1=C(C)N=C(O)NC1=O	157	1.88	1.892	-2.41
omega_215165	-9.13421	-14.7145	0.465154	4.92703	2.93761	-1.66469	-1.08476	2	CL7739	DC	5	1	F315-0626	6	5-isoxazol-5-yl-2-methyl-N-(5,6,7,8-tetrahydronaphthalen-1-yl)furan-3-sulfonamide	93.72	[SH0]([O+H]c1c(C)oc(-c2oncc2)c1)([O-])=Nc1c2c(ccc1)CCCC2	3	3.66	3.64	-5.02
omega_540750	-9.13293	-12.1708	0.343533	5.08183	2.46313	-2.94574	-1.90492	6		DC	8	1	8004-1340	5	N'~1~-[(E)-1-(4-bromo-5-methyl-2-furyl)methylidene]-2-(2,4,6-trichlorophenoxy)acetohydrazide	63.83	Brc1c(C)oc(C=NNC(=O)COc2c(Cl)cc(Cl)cc2Cl)c1	14	4.05	5.36	-5.23
omega_781362	-9.13213	-12.6118	0.536056	4.16674	3.55864	-2.54651	-2.23521	6	CL2277	DC	5	1	K905-0102	6	N-(2-ethoxyphenyl)-2-(6-methyl-4-oxothieno[2,3-d]pyrimidin-3(4H)-yl)acetamide	71	O=C(Nc1c(OCC)cccc1)CN1C(=O)c2c(sc(C)c2)N=C1	1	1.76	1.37	-2.02
omega_890517	-9.13086	-11.9803	0.311573	4.65373	2.63081	-3.24923	-1.49746	2		DC	3	1	Y031-6619	3	N-[3-(trifluoromethyl)phenyl]nicotinamide	41.99	FC(F)(F)c1cc(NC(=O)c2cnccc2)ccc1	42	2.9	2.9	-3.74
omega_22668	-9.13069	-8.85443	0.528557	3.12209	4.15528	-4.57937	-3.50283	5	CV0299	DC	4	2	C720-0630	6	2-hydroxy-4-oxo-N-propyl-4H-pyrido[1,2-a]pyrimidine-3-carboxamide	82	O=C(NCCC)C=1C(=O)N2C(=NC=1O)C=CC=C2	2	-0.89	0.11	-0.8
omega_103317	-9.12908	-13.1127	0.539214	5.13667	4.67383	-3.80249	-2.56361	4	CL8250	DC	5	2	D433-1466	7	6-benzyl-2-{[(5-chloro-2-methoxyphenyl)amino]methyl}-5-methyl[1,2,4]triazolo[1,5-a]pyrimidin-7(4H)-one	81.07	Clc1cc(NCc2nn3C(=O)C(Cc4ccccc4)=C(C)Nc3n2)c(OC)cc1	213	2.42	3.59	-1.99
omega_369169	-9.1288	-10.5254	0.235252	3.07676	3.0826	-2.81044	-2.18756	8		DC	4	2	1548-0583	6	N-(2-oxo-2-{2-[(E,2E)-3-phenyl-2-propenylidene]hydrazino}ethyl)-2-pyridinecarboxamide	83.45	O=C(NN=CC=Cc1ccccc1)CNC(=O)c1ncccc1	1	1.39	1.27	-0.88
omega_743903	-9.12747	-13.2999	0.873167	5.80761	5.00161	-3.70235	-3.80764	7	CL2607	DC	7	3	K284-0045	7	N-[2-(1H-indol-3-yl)ethyl]-3-(2-methoxyethyl)-4-oxo-2-thioxo-1,2,3,4-tetrahydro-7-quinazolinecarboxamide	118.55	S=C1N(CCOC)C(=O)c2c(N1)cc(C(=O)NCCc1c3c([nH]c1)cccc3)cc2	2	1.93	1.93	-4.58
omega_124359	-9.12727	-8.80394	0.456933	3.67676	5.27893	-5.52881	-4.20715	4	CM0132	DC	7	3	D668-0071	7	N-(2,4-difluorophenyl)-2-hydroxy-6-oxo-1,6-dihydropyrimidine-5-sulfonamide	116.24	S(=O)(=O)(Nc1c(F)cc(F)cc1)C=1C(=O)NC(O)=NC=1	194	-0.39	-0.096	-0.92
omega_62116	-9.12721	-11.9293	0.323325	3.71309	3.7094	-2.91108	-2.03261	6	CL5013	DC	6	2	D205-0382	7	2-fluoro-N-(7-hydroxy-5-propyl[1,2,4]triazolo[1,5-a]pyrimidin-2-yl)benzamide	92.41	Fc1c(C(=O)Nc2nn3C(O)=CC(CCC)=Nc3n2)cccc1	138	0.61	3.43	-2.9
omega_22680	-9.12675	-9.43893	0.624785	3.62333	4.33456	-4.68025	-3.59025	6	CV0299	DC	5	2	C720-0644	7	2-hydroxy-N-(2-methoxy-1-methylethyl)-4-oxo-4H-pyrido[1,2-a]pyrimidine-3-carboxamide	91.23	O=C(NC(COC)C)C=1C(=O)N2C(=NC=1O)C=CC=C2	52	-1.57	-0.52	0.09
omega_22586	-9.12545	-9.78488	0.629908	3.75785	4.99438	-4.30539	-4.41732	7	CV0299	DC	5	3	C720-0519	7	2-hydroxy-N-[1-(hydroxymethyl)propyl]-9-methyl-4-oxo-4H-pyrido[1,2-a]pyrimidine-3-carboxamide	102.23	O=C(NC(CO)CC)C=1C(=O)N2C(C(C)=CC=C2)=NC=1O	68	-0.36	0.15	-0.26
omega_207772	-9.1251	-13.8104	0.574471	5.73779	4.39386	-3.99011	-2.03067	8	CL7618	DC	5	2	F223-0530	6	2-[2-(acetylamino)-1,3-benzothiazol-6-yl]-N-[2-(2-furyl)-1-methylethyl]acetamide	112.47	O=C(NC(Cc1occc1)C)Cc1cc2sc(NC(=O)C)nc2cc1	17	1.4	1.98	-2.38
omega_1300130	-9.12443	-12.8279	0.514461	4.74656	4.10942	-4.11967	-1.54729	2	CL8429	NC	4	1	F937-1530	4	N-(4-fluorobenzyl)-4-methyl-2-(4-methylphenyl)pyrimidine-5-carboxamide	54.88	Fc1ccc(CNC(=O)c2c(C)nc(-c3ccc(C)cc3)nc2)cc1	10	3.98	3.44	-3.65
omega_124433	-9.12379	-11.5701	0.443703	4.89226	4.95375	-4.37539	-3.46803	4	CM0132	DC	5	3	D668-0236	7	2-hydroxy-4-methyl-N~5~-(4-methylphenyl)-6-oxo-1,6-dihydro-5-pyrimidinesulfonamide	116.24	S(=O)(=O)(Nc1ccc(C)cc1)C1=C(C)N=C(O)NC1=O	153	0.56	0.493	-0.6
omega_941780	-9.12378	-12.2655	0.28803	5.44048	2.5495	-2.15645	-2.97988	4		DC	4	2	8017-5514	4	2-[(3-fluorobenzyl)sulfanyl]-7-hydroxy[1,3]thiazolo[4,5-b]pyridin-5(4H)-one	115.76	S(Cc1cc(F)ccc1)c1sc2C(O)=CC(=O)Nc2n1	31	1.51	4.15	-4.41
omega_622740	-9.1227	-7.86326	0.335856	3.14311	4.25658	-4.1969	-4.79809	3		DC	5	3	8020-2477	5	5-[(4-fluoroanilino)methyl]-1,2-dihydro-3H-1,2,4-triazol-3-one	65.52	Fc1ccc(NCC2=NC(=O)NN2)cc1	32	-0.47	-0.46	-1.43
omega_612098	-9.12242	-11.6644	0.346527	4.16156	3.9395	-3.24743	-2.65816	3		DC	6	3	8018-5648	6	2-amino-6-benzyl-5-methyl[1,2,4]triazolo[1,5-a]pyrimidin-7-ol	89.33	OC1=C(Cc2ccccc2)C(C)=Nc2n1nc(N)n2	54	-1.49	1.15	-2.84
omega_31585	-9.12214	-11.3563	0.486557	4.23933	4.76736	-4.43485	-2.82425	6	CL6481	DC	7	1	C796-0849	9	N-[2-(4-methylpiperidin-1-yl)ethyl]-2-morpholin-4-yl-5-oxo-5H-[1,3,4]thiadiazolo[3,2-a]pyrimidine-6-carboxamide	115.14	O=C(NCCN1CCC(C)CC1)C=1C(=O)N2N=C(N3CCOCC3)SC2=NC=1	122	-0.17	1.39	-0.39
omega_356289	-9.12172	-13.8784	0.718819	5.80523	3.5087	-1.71424	-3.5618	5		DC	5	2	0627-0119	7	N-Naphthalen-1-yl-3-nitro-phthalamic acid	112.22	O=[N+]([O-])c1c(C(=O)Nc2c3c(ccc2)cccc3)c(C(=O)O)ccc1	159	0.16	3.02	-0.25
omega_277544	-9.12128	-11.8369	0.680448	5.28026	2.76985	-3.79875	-2.21617	6	CL5886	DC	5	0	G020-0093	5	6-(4-chlorobenzyl)-2-ethyl-5-(propylthio)-2,6-dihydro-7H-pyrazolo[4,3-d]pyrimidin-7-one	75.79	Clc1ccc(CN2C(SCCC)=Nc3c(C2=O)nn(CC)c3)cc1	31	5.21	4.23	-4.07
omega_87169	-9.12116	-13.8688	0.531461	6.02713	4.11292	-3.05808	-2.86582	4	CL7372	DC	4	2	D351-0414	6	5-{[(5-chloro-2-methylphenyl)amino]methyl}-2-(2-methylphenyl)[1,2,4]triazolo[1,5-a]pyrimidin-7(4H)-one	71.84	Clc1cc(NCC=2Nc3n(C(=O)C=2)nc(-c2c(C)cccc2)n3)c(C)cc1	175	3.38	3.98	-3.5
omega_519904	-9.12066	-10.9465	0.367382	3.7332	3.04847	-3.15727	-2.1659	3	CL1059	DC	4	1	6834-0355	6	6-[(pyridin-2-ylamino)methyl]-5H-pyrrolo[3,4-b]pyridine-5,7(6H)-dione	75.19	O=C1N(CNc2ncccc2)C(=O)c2c1nccc2	201	-1.92	1.22	0.14
omega_325993	-9.11999	-13.2013	0.731468	5.45573	5.08692	-4.73726	-2.4556	7	CL6290	DC	7	1	G639-3507F	8	[4-(1H-indol-6-ylcarbonyl)piperazino][5-(4-pyridyl)-1H-pyrazol-3-yl]methanone	80.76	O=C(N1CCN(C(=O)c2cc3[nH]ccc3cc2)CC1)c1n[nH]c(-c2ccncc2)c1	2	2.87	2.87	-5
omega_944904	-9.11985	-6.24652	0.273392	2.66592	5.67698	-5.92568	-5.56394	1		DC	6	4	8018-2943	6	4-(5-methyl-4H-1,2,4-triazol-3-yl)-1H-pyrazol-3-amine	96.27	Nc1c(-c2[nH]c(C)nn2)c[nH]n1	31	-2.48	-2.47	-0.75
omega_502174	-9.11945	-8.90558	0.553572	4.41614	5.19797	-5.7344	-4.64715	3	CL1526	DC	3	2	5977-0073	5	5-[(2-ethylphenyl)amino]-6-methyl-1,2,4-triazin-3(2H)-one	65.85	O=C1N=C(Nc2c(CC)cccc2)C(C)=NN1	2	2.29	1.92	-2.73
omega_536599	-9.11933	-12.0079	0.396248	4.61884	3.60618	-2.32433	-3.40834	7		DC	5	3	8003-3417	6	2-{2-[(E)-1-(5-bromo-2-hydroxyphenyl)methylidene]hydrazino}-N~1~-(2,5-dimethylphenyl)-2-oxoacetamide	90.79	Brc1cc(C=NNC(=O)C(=O)Nc2c(C)ccc(C)c2)c(O)cc1	12	2.87	3.4	-1.38
omega_1474447	-9.11927	-13.6149	0.390193	5.50817	3.14776	-2.5297	-2.02075	5	CL6310	NC	3	2	M830-2164	4	4-[6-(2-methoxyphenoxy)pyridazin-3-yl]-N-(4-methylphenyl)benzamide	82.26	O=C(Nc1c(C)c(C)ccc1)c1c(C)nc(Nc2cc(C)ccc2)s1	44	3.786	5.525	-4.32
omega_1393831	-9.11836	-12.4358	0.419676	4.97003	2.63708	-3.19809	-1.51121	4	CL8573	NC	4	1	L454-0057	3	1-{2-[4-(2,3-dimethylphenyl)piperazin-1-yl]-2-oxoethyl}-6-(5-methyl-1,3,4-oxadiazol-2-yl)-1H-indole	41.99	Fc1cc(F)cc(NC(=O)c2cnc(-c3cc(C)ccc3)cc2)c1	15	4.4	4.31	-4.16
omega_6179	-9.11806	-12.4719	0.330986	4.46813	5.05886	-2.96798	-3.53614	5	CL1273	DC	7	2	C612-0733	6	3-{[(3,5-dichlorophenyl)amino]carbonyl}pyrazine-2-carboxylic acid	92.18	Clc1cc(Cl)cc(NC(=O)c2c(C(=O)O)nccn2)c1	8	-1.07	2.1	0.8
omega_905599	-9.1176	-11.9609	0.26285	4.81705	2.09933	-2.36695	-1.96896	1		DC	2	1	Y040-9685	2	3-(1,2-dihydro-5-acenaphthylenyl)-1H-pyrazole	28.68	c1(-c2c3c4c(cc2)CCc4ccc3)n[nH]cc1	13	-4.4693	4.41	4.2213
omega_389819	-9.11652	-12.0481	0.370296	4.57676	2.81357	-2.86347	-1.96562	6		DC	3	2	2181-1202	5	N'-[(E)-1-(5-methyl-2-furyl)methylidene]-2-(1-naphthylamino)acetohydrazide	66.63	O=C(NN=Cc1oc(C)cc1)CNc1c2c(ccc1)cccc2	38	4.56	3.08	-4.84
omega_1467111	-9.11529	-14.9715	0.520441	6.31698	4.49848	-3.94879	-1.53088	3	CL9740	NC	4	1	M567-0250	5	N-{5-[(Z)-2-(3-{[(2,5-dimethylphenyl)amino]sulfonyl}-4-methylphenyl)vinyl]-3-methylisoxazol-4-yl}acetamide	61.88	Clc1ccc(-c2nc3c(cn2)CN(C(=O)c2[nH]c4c(c2)cccc4)CC3)cc1	2	3.99	4.135	-7.6
omega_586629	-9.11499	-12.2854	0.370205	5.34865	4.56675	-4.64224	-2.47293	5		DC	5	2	8013-2900	5	4-[(phenethylamino)carbonyl]nicotinic acid	79.29	O=C(O)c1c(C(=O)NCCc2ccccc2)ccnc1	33	-2.51392	0.66	1.12577
omega_41629	-9.11414	-13.1414	0.472794	5.96915	3.63561	-4.46599	-1.58427	6	CL4403A	DC	4	1	C999-0256	5	2-(5,7-dimethyl-2-phenylpyrazolo[1,5-a]pyrimidin-6-yl)-N-(thien-2-ylmethyl)acetamide	87.53	O=C(NCc1sccc1)CC1=C(C)n2nc(-c3ccccc3)cc2N=C1C	1	4.91	3.22	-3.68
omega_379608	-9.11362	-12.4904	0.367193	5.83556	2.24472	-2.17928	-2.89138	7		DC	4	2	1910-1573	5	N'-[(1E)-(2-hydroxy-3-methoxyphenyl)methylene]-1,1'-biphenyl-4-carbohydrazide	70.92	O=C(NN=Cc1c(O)c(OC)ccc1)c1ccc(-c2ccccc2)cc1	18	3.53	3.92	-3.52
omega_983530	-9.11175	-12.2131	0.410665	4.14748	4.06475	-2.97519	-2.54639	3	CM2582	IC	5	3	S451-0372	5	N-(4-fluoro-2-methylphenyl)-3-(1H-pyrrol-2-yl)-1H-pyrazole-5-carboxamide	73.57	Fc1cc(C)c(NC(=O)c2[nH]nc(-c3[nH]ccc3)c2)cc1	76	2.24802	2.33	-3.13351
omega_1325766	-9.11174	-14.2786	0.649368	4.68863	4.58025	-2.54479	-2.20658	4	CL6135	NC	6	1	G663-0045	8	methyl 2-{[(4-oxo-6,7,8,9-tetrahydropyrimido[4,5-b]quinolin-3(4H)-yl)acetyl]amino}benzoate	100.96	O=C(Nc1c(C(=O)OC)cccc1)CN1C(=O)c2c(nc3c(c2)CCCC3)N=C1	38	1.22	1.684	-2.21
omega_539153	-9.11036	-11.3381	0.311494	4.22814	3.57628	-2.16886	-3.71932	7		DC	6	3	8003-8702	9	2-{2-[(E)-1-(2-hydroxy-5-nitrophenyl)methylidene]hydrazino}-N~1~-(2-methylphenyl)-2-oxoacetamide	136.61	O=[N+]([O-])c1cc(C=NNC(=O)C(=O)Nc2c(C)cccc2)c(O)cc1	4	2.08	2.06	-1.12
omega_44422	-9.11032	-13.144	0.365606	4.50528	1.89231	-1.61695	-1.11256	6	CL1721	DC	2	1	D011-5266	4	N-{2-[1-(4-methylbenzyl)-1H-benzimidazol-2-yl]ethyl}acetamide	46.92	O=C(NCCc1n(Cc2ccc(C)cc2)c2c(n1)cccc2)C	225	3.75	3.19	-3.18
omega_181722	-9.11031	-13.3173	0.552147	5.80309	3.03571	-3.03043	-2.15356	5	CL6032	DC	5	1	E946-0336	6	ethyl 6-methyl-4-[(4-methylphenyl)amino]furo[2,3-d]pyrimidine-5-carboxylate	77.25	O=C(OCC)c1c(C)oc2ncnc(Nc3ccc(C)cc3)c12	13	0.17	3.34	-1.81
omega_106700	-9.10949	-13.9187	0.539632	5.56008	4.79077	-4.16254	-1.91876	2	CL6729A	DC	5	1	D458-0030	6	2-(5,7-dimethyl-2-phenyl[1,2,4]triazolo[1,5-a]pyrimidin-6-yl)-N-(2-fluorophenyl)acetamide	72.18	Fc1c(NC(=O)CC2=C(C)n3nc(-c4ccccc4)nc3N=C2C)cccc1	152	3.84	3.45	-5.21
omega_113277	-9.10598	-12.1333	0.601401	5.35149	4.24223	-4.21699	-2.95078	4	CL7372	DC	4	2	D489-0150	6	5-{[(3,4-dimethylphenyl)amino]methyl}-2-(2-thienyl)[1,2,4]triazolo[1,5-a]pyrimidin-7(4H)-one	109.31	O(C)c1cc(NCC=2Nc3n(C(=O)C=2)nc(-c2sccc2)n3)ccc1	101	1.34	3.04	-0.95
omega_586613	-9.10587	-12.1427	0.390564	4.90201	3.29988	-4.03277	-1.52288	5	CL1307	DC	4	1	8013-2884	4	N~3~-benzyl-6-chloro-2-methoxy-4-methylnicotinamide	51.22	Clc1nc(OC)c(C(=O)NCc2ccccc2)c(C)c1	35	2.53	3.35	-3.18
omega_376045	-9.10556	-10.9516	0.231705	4.09842	2.07754	-2.23681	-2.32484	7		DC	4	3	1761-0732	5	2-(4-fluoroanilino)-N'-[(E)-1-(4-hydroxyphenyl)methylidene]acetohydrazide	73.72	Fc1ccc(NCC(=O)NN=Cc2ccc(O)cc2)cc1	1	2.59	2	-1.81
omega_575928	-9.10368	-11.7747	0.473274	4.13619	5.28612	-3.8952	-3.3294	4		DC	8	2	8011-6581	8	2-(5-methyl-7-oxo-6-phenoxy-4,7-dihydro[1,2,4]triazolo[1,5-a]pyrimidin-2-yl)acetic acid	106.34	O=C(O)Cc1nn2C(=O)C(Oc3ccccc3)=C(C)Nc2n1	34	-3.2585	1.5	0.9496
omega_22434	-9.10258	-11.6459	0.486049	4.22591	3.69811	-3.88126	-1.98552	3	CL3531	DC	5	1	C720-0010	5	N-(4-chlorobenzyl)-4-oxo-4H-pyrido[1,2-a]pyrimidine-3-carboxamide	61.77	Clc1ccc(CNC(=O)C=2C(=O)N3C(=NC=2)C=CC=C3)cc1	1	2.13	2.13	-3.82
omega_22625	-9.10044	-9.37141	0.644578	3.39551	4.83819	-4.83173	-3.77557	7	CV0299	DC	5	2	C720-0576	7	2-hydroxy-N-(3-methoxypropyl)-8-methyl-4-oxo-4H-pyrido[1,2-a]pyrimidine-3-carboxamide	91.23	O=C(NCCCOC)C=1C(=O)N2C(=NC=1O)C=C(C)C=C2	46	-1.07	-0.39	0.05
omega_375072	-9.10027	-13.0027	0.490131	5.03576	3.66483	-2.77981	-2.5085	5	CL2337	DC	3	2	1710-0044	4	2-(1H-benzimidazol-2-ylthio)-N-mesitylacetamide	57.78	S(CC(=O)Nc1c(C)cc(C)cc1C)c1[nH]c2c(n1)cccc2	2	4.37	4.52	-3.29
omega_1341289	-9.0998	-12.0359	0.695052	5.56821	5.08131	-5.54272	-2.8658	3	CL2482A	NC	6	1	G881-0069	6	N-(4-chlorobenzyl)-2-(4-oxopyrido[3',2':4,5]thieno[3,2-d]pyrimidin-3(4H)-yl)acetamide	102.9	Clc1ccc(CNC(=O)CN2C(=O)c3sc4ncccc4c3N=C2)cc1	119	2.14	1.96	-4.22
omega_543795	-9.09764	-12.0697	0.334706	5.55998	2.41797	-3.56267	-1.77794	4		DC	2	1	8004-7646	3	N-[(E)-1-(2-methyl-1H-indol-3-yl)methylidene]-N-[2-(4-pyridyl)ethyl]amine	41.04	N(=Cc1c(C)[nH]c2c1cccc2)CCc1ccncc1	29	2.92	3.04	-4.97
omega_1004635	-9.09679	-9.68706	0.361084	3.72468	3.8897	-4.40335	-2.98184	2	CM4193	IC	5	1	S636-0275	5	7-(3,4-difluorobenzyl)-2,5,6,7,8,9-hexahydro-3H-[1,2,4]triazolo[4,3-d][1,4]diazepin-3-one	47.94	Fc1c(F)ccc(CN2CCN3C(=O)NN=C3CC2)c1	31	0.66	0.81	-2.5
omega_598553	-9.09559	-10.3522	0.290237	3.88029	4.25516	-4.33432	-2.83472	4		DC	5	2	8015-3603	5	1-(2-methyl-1H-indol-3-yl)-2-(4H-1,2,4-triazol-3-ylsulfanyl)-1-ethanone	99.73	S(CC(=O)c1c(C)[nH]c2c1cccc2)c1[nH]cnn1	31	0.74	0.77	-3.19
omega_1080049	-9.09543	-10.9934	0.49711	4.32646	2.77196	-3.19854	-2.49905	6	CM4373A	IC	5	2	T151-0174	5	N-[2-(1-cyclopropyl-5-methyl-1H-imidazol-2-yl)ethyl]-N'-(4-fluorobenzyl)urea	58.95	Fc1ccc(CNC(=O)NCCc2n(c(C)cn2)C2CC2)cc1	55	1.92	2.48	-7.21
omega_1337315	-9.09518	-11.1144	0.555311	4.02147	3.22081	-4.26335	-1.51503	4	CL2717	NC	5	1	G822-0909	4	7-chloro-N-(4-fluorobenzyl)furo[2,3-b]quinoline-2-carboxamide	55.13	Clc1cc2nc3oc(C(=O)NCc4ccc(F)cc4)cc3cc2cc1	132	4.67	4.33	-5.95
omega_968090	-9.09451	-13.1112	0.453234	5.39783	3.94508	-4.3114	-1.46801	4	CM1206	IC	6	3	P806-0592	6	N-{1-[3-(4-chlorophenyl)-1H-pyrazol-5-yl]-3-piperidyl}-1H-indole-2-carboxamide	76.81	Clc1ccc(-c2n[nH]c(N3CC(NC(=O)c4[nH]c5c(c4)cccc5)CCC3)c2)cc1	54	4.86	5.84	-6.2643
omega_1002099	-9.09401	-13.0388	0.515344	5.90149	2.67219	-2.27974	-2.86448	3	CM4195	IC	4	1	S627-0075	4	N-cyclopropyl-6-oxo-8-phenyl-1,3,4,6-tetrahydro-2H-quinolizine-9-carboxamide	49.41	O=C(NC1CC1)C=1C(c2ccccc2)=CC(=O)N2C=1CCCC2	34	1.43	1.43	-2.38
omega_551175	-9.09356	-11.5554	0.380705	4.69287	3.48209	-2.16992	-3.92392	7		DC	5	3	8006-3293	6	N~1~-(4-chloro-2-methylphenyl)-2-{2-[(E)-1-(2-hydroxyphenyl)methylidene]hydrazino}-2-oxoacetamide	90.79	Clc1cc(C)c(NC(=O)C(=O)NN=Cc2c(O)cccc2)cc1	10	2.08	2.83	-2.61
omega_375882	-9.09241	-9.5969	0.346766	3.81924	2.645	-3.60922	-2.69729	6		DC	4	2	1761-0423	5	2-(4-bromoanilino)-N'-[(E)-1-(2-furyl)methylidene]acetohydrazide	66.63	Brc1ccc(NCC(=O)NN=Cc2occc2)cc1	113	3.09	2.21	-2.72
omega_1470662	-9.09225	-12.2586	0.435514	4.78268	2.87922	-3.43456	-1.49646	4	CL9870	NC	5	1	M710-0739	5	N-(5-chloro-2-methylphenyl)-6-pyrimidin-5-ylnicotinamide	67.77	Clc1cc(NC(=O)c2cnc(-c3cncnc3)cc2)c(C)cc1	1	2.112	2.783	-2.95
omega_103397	-9.09156	-11.7368	0.382669	4.06863	4.18127	-3.89265	-2.09464	4	CL2653	DC	4	2	D433-1695	6	6-benzyl-2-(hydroxymethyl)-5-methyl[1,2,4]triazolo[1,5-a]pyrimidin-7(4H)-one	80.04	O=C1C(Cc2ccccc2)=C(C)Nc2n1nc(CO)n2	1	-0.33	1.22	0.06
omega_918086	-9.09038	-10.2887	0.529085	5.52754	5.15873	-5.0096	-5.00749	5		DC	6	3	Y043-5098	6	6-fluoro-4-hydroxy-N-[2-(1H-imidazol-4-yl)ethyl]-3-quinolinecarboxamide	90.9	Fc1cc2c(O)c(C(=O)NCCc3nc[nH]c3)cnc2cc1	30	-1.28	1.28	-3.08
omega_610021	-9.08908	-8.3233	0.336661	3.02164	4.86015	-4.29484	-4.68938	5		DC	7	5	8018-2543	7	4-[(4-pyridylmethyl)amino]-1H-pyrazole-5-carbohydrazide	108.72	O=C(NN)c1c(NCc2ccncc2)cn[nH]1	27	-3.7159	-0.52	2.27391
omega_1004642	-9.08758	-10.3018	0.227561	3.62235	4.07074	-3.79451	-2.91193	2	CM4193	IC	6	1	S636-0312	6	7-(3-pyridylmethyl)-2,5,6,7,8,9-hexahydro-3H-[1,2,4]triazolo[4,3-d][1,4]diazepin-3-one	60.83	O=C1N2C(=NN1)CCN(Cc1cnccc1)CC2	1	-0.38	-0.21	-1.94
omega_334964	-9.08683	-11.3423	0.401365	4.39777	4.79791	-3.81594	-3.5256	5	CL7215	DC	4	2	G751-0011	5	2-{[(5-propyl-4H-1,2,4-triazol-3-yl)thio]methyl}quinolin-4(1H)-one	95.97	S(CC=1Nc2c(C(=O)C=1)cccc2)c1[nH]c(CCC)nn1	78	2.78	2.47	-2.49
omega_1291811	-9.08559	-13.2757	0.375933	4.82115	3.45736	-1.90085	-2.56345	3	CL8342	NC	3	2	F731-0264	5	N-(8-methyl-11-oxo-10,11-dihydrodibenzo[b,f][1,4]oxazepin-2-yl)benzamide	67.43	O=C(Nc1cc2C(=O)Nc3c(Oc2cc1)ccc(C)c3)c1ccccc1	98	2.28	3.82	-2.81
omega_539910	-9.0848	-12.3078	0.338113	4.54566	3.0662	-2.30873	-2.41827	6		DC	5	2	8004-0009	5	2-{2-[(E)-1-(3-bromophenyl)methylidene]hydrazino}-N~1~-(4-chloro-2-methylphenyl)-2-oxoacetamide	70.56	Brc1cc(C=NNC(=O)C(=O)Nc2c(C)cc(Cl)cc2)ccc1	39	3.51	3.85	-2.23
omega_1500122	-9.08466	-11.3454	0.466532	4.1372	3.70126	-3.44297	-2.60124	4	CM0615	NC	5	3	P574-0935	6	2-[2-amino-4-methyl-6-oxo-1(6H)-pyrimidinyl]-N~1~-(3,4-difluorophenyl)acetamide	87.79	Fc1c(F)ccc(NC(=O)CN2C(N)=NC(C)=CC2=O)c1	166	1.56	1.228	-0.16
omega_426472	-9.08412	-13.2401	0.426339	4.77711	3.43885	-1.09373	-3.39256	7		DC	7	3	3347-5261	6	4-{[(3,5-dichlorophenyl)amino]carbonyl}isophthalic acid	103.7	Clc1cc(Cl)cc(NC(=O)c2c(C(=O)O)cc(C(=O)O)cc2)c1	13	-2.09	3.15	3.09
omega_87029	-9.08355	-12.9573	0.534406	5.46662	4.04051	-3.62358	-2.54421	4	CL7372	DC	4	2	D351-0036	6	5-{[(5-chloro-2-methylphenyl)amino]methyl}-2-phenyl[1,2,4]triazolo[1,5-a]pyrimidin-7(4H)-one	71.84	Clc1cc(NCC=2Nc3n(C(=O)C=2)nc(-c2ccccc2)n3)c(C)cc1	198	2.7	3.5	-4.12
omega_538228	-9.08299	-10.8623	0.484068	4.51132	2.79836	-3.2876	-2.72683	6		DC	3	2	8003-6627	5	N'-[(E)-1-(2-furyl)methylidene]-2-(2-naphthylamino)acetohydrazide	66.63	O=C(NN=Cc1occc1)CNc1cc2c(cc1)cccc2	25	3.9	2.37	-3.32
omega_22623	-9.08223	-9.40555	0.649737	3.5463	4.15424	-4.54544	-3.48152	6	CV0299	DC	4	2	C720-0574	6	2-hydroxy-8-methyl-N-(3-methylbutyl)-4-oxo-4H-pyrido[1,2-a]pyrimidine-3-carboxamide	82	O=C(NCCC(C)C)C=1C(=O)N2C(=NC=1O)C=C(C)C=C2	65	0.58	1.26	-1.78
omega_191691	-9.08218	-13.1253	0.459833	5.15404	5.59902	-3.70976	-3.46	5	CL5923	DC	5	2	F044-0025	8	2-morpholin-4-yl-2-oxo-N-[(4-oxo-3,4-dihydrophthalazin-1-yl)methyl]acetamide	100.1	O=C(NCC1=NNC(=O)c2c1cccc2)C(=O)N1CCOCC1	34	-0.47	-0.86	1.44
omega_1333594	-9.08218	-12.9481	0.538344	5.06295	3.5361	-3.1487	-2.12273	6	CL2232	NC	6	1	G786-1427	6	N-(4-methyl-1,3-thiazol-2-yl)-2-[(2-phenylimidazo[1,2-b]pyridazin-6-yl)thio]acetamide	125.72	S(CC(=O)Nc1scc(C)n1)C1=Nn2c(nc(-c3ccccc3)c2)C=C1	47	4.97	3.5	-5.61
omega_284932	-9.08078	-10.072	0.546578	3.69436	4.96638	-5.14859	-3.06754	8	CL6481	DC	6	1	G205-0866	8	N-[2-(diethylamino)ethyl]-5-oxo-2-pyrrolidin-1-yl-5H-[1,3,4]thiadiazolo[3,2-a]pyrimidine-6-carboxamide	105.91	O=C(NCCN(CC)CC)C=1C(=O)N2N=C(N3CCCC3)SC2=NC=1	34	0.48	1.69	-1.17
omega_44423	-9.08073	-12.8591	0.383641	4.43136	1.90706	-1.75796	-1.18577	6	CL1721	DC	3	1	D011-5267	4	N-{2-[1-(4-chlorobenzyl)-1H-benzimidazol-2-yl]ethyl}acetamide	46.92	Clc1ccc(Cn2c(CCNC(=O)C)nc3c2cccc3)cc1	207	4.1	3.37	-3.87
omega_124350	-9.08034	-9.07448	0.336916	3.09483	4.9476	-4.6823	-3.70291	4	CM0132	DC	6	3	D668-0052	7	N-(4-fluorophenyl)-2-hydroxy-6-oxo-1,6-dihydropyrimidine-5-sulfonamide	116.24	S(=O)(=O)(Nc1ccc(F)cc1)C=1C(=O)NC(O)=NC=1	196	-0.47	-0.301	-1.14
omega_252133	-9.07903	-12.8164	0.704152	5.17005	2.91566	-2.69755	-2.35496	3	CL7852	DC	4	1	F692-0381	5	7,8-dimethyl-4-oxo-N-(5,6,7,8-tetrahydronaphthalen-1-yl)-4H-[1,3]thiazino[3,2-a]benzimidazole-2-carboxamide	89.29	O=C(Nc1c2c(ccc1)CCCC2)C=1Sc2n(C(=O)C=1)c1c(n2)cc(C)c(C)c1	82	3.74	5.65	-5.55
omega_1046312	-9.07879	-9.38312	0.598784	4.54291	3.43517	-5.06871	-3.20382	5	CM5143	IC	8	2	SA19-0656	8	N~4~-[(7-benzyl-8-oxo-5,6,7,8-tetrahydroimidazo[1,2-a]pyrazin-2-yl)methyl]-1H-pyrazole-4-carboxamide	95.91	O=C(NCc1nc2C(=O)N(Cc3ccccc3)CCn2c1)c1c[nH]nc1	1	-0.43	-0.43	-2.98
omega_593918	-9.07837	-9.5892	0.487176	3.08541	3.38585	-3.89801	-2.5496	4		DC	4	2	8014-7527	4	2-hydroxy-3-methyl-N~1~-(2-pyridylmethyl)benzamide	62.22	O=C(NCc1ncccc1)c1c(O)c(C)ccc1	5	1.56	1.6	-1.79
omega_536800	-9.07828	-11.8034	0.324444	4.6935	2.03699	-1.84369	-2.48609	5		DC	4	2	8003-3749	4	N'~2~-[(E)-1-(4-fluorophenyl)methylidene]-3-hydroxy-2-naphthohydrazide	61.69	Fc1ccc(C=NNC(=O)c2c(O)cc3c(c2)cccc3)cc1	12	3.89	3.53	-4.21
omega_930173	-9.07822	-9.74733	0.346717	3.19161	4.05112	-4.8431	-2.07724	3	CL1274	DC	4	1	Y200-0517	4	N~2~-(4-methylbenzyl)-2-pyrazinecarboxamide	54.88	O=C(NCc1ccc(C)cc1)c1nccnc1	2	2.02844	1.77	-1.96264
omega_1322914	-9.07792	-12.8623	0.534425	4.60204	2.75653	-3.61697	-0.491596	3	CL6074	NC	6	0	G607-0325	6	1-ethyl-6-fluoro-3-(3-pyridin-2-yl-1,2,4-oxadiazol-5-yl)quinolin-4(1H)-one	72.12	Fc1cc2C(=O)C(c3onc(-c4ncccc4)n3)=CN(CC)c2cc1	64	1.05	2.67	-6.01
omega_875242	-9.07762	-12.57	0.468926	4.67027	2.63209	-2.39598	-1.88292	5		DC	4	1	Y030-0494	4	2,6-dimethoxy-N~1~-(1-phenylethyl)benzamide	47.56	O=C(NC(C)c1ccccc1)c1c(OC)cccc1OC	15	2.99112	2.11	-5.0581
omega_1505201	-9.07687	-8.98225	0.643457	3.95282	4.70559	-5.50783	-3.88865	4	CL8338	NC	6	2	P666-0125	7	N-(2-fluorobenzyl)-1-oxo-1,2-dihydropyrrolo[1,2-d][1,2,4]triazine-7-sulfonamide	100.94	S(=O)(=O)(NCc1c(F)cccc1)c1cn2c(C(=O)NN=C2)c1	26	1.993	-0.138	-2.92
omega_797295	-9.07686	-13.107	0.454177	5.55167	3.92812	-4.53958	-1.36426	4	CM1206A	DC	7	3	P806-0099	7	N-{1-[3-(4-pyridyl)-1H-pyrazol-5-yl]-3-piperidyl}-1H-indole-2-carboxamide	89.7	O=C(NC1CN(c2[nH]nc(-c3ccncc3)c2)CCC1)c1[nH]c2c(c1)cccc2	2	3.73	3.73	0.0351
omega_480916	-9.07641	-10.6628	0.789173	5.06048	2.69326	-4.15734	-2.79919	5		DC	2	3	4896-5362	4	5-(di-1H-indol-3-ylmethyl)-2-methoxyphenol	61.04	O(C)c1c(O)cc(C(c2c3c([nH]c2)cccc3)c2c3c([nH]c2)cccc3)cc1	83	5.56	4.28	-6.24
omega_284855	-9.07631	-9.24782	0.450174	3.69707	4.6257	-5.64159	-2.95985	4	CL6481	DC	6	1	G205-0618	8	N-cyclopropyl-2-morpholin-4-yl-5-oxo-5H-[1,3,4]thiadiazolo[3,2-a]pyrimidine-6-carboxamide	111.9	O=C(NC1CC1)C=1C(=O)N2N=C(N3CCOCC3)SC2=NC=1	13	1.1	0.57	-1.79
omega_1513933	-9.07498	-14.1425	0.601312	6.69697	5.26611	-3.49953	-3.99736	2	CM1524	NC	7	2	S021-0976	7	6-(1H-indol-6-ylcarbonyl)-2-phenyl-5,6,7,8-tetrahydropyrazolo[1,5-a]pyrido[3,4-d]pyrimidin-9(1H)-one	80.8	O=C(N1CC=2N=C3N(C(=O)C=2CC1)NC(c1ccccc1)=C3)c1cc2[nH]ccc2cc1	56	1.76607	2.58	-3.7886
omega_1431498	-9.07294	-11.236	0.588966	3.94347	5.6912	-4.53702	-3.52356	6	CL9020	NC	5	3	L879-0015	6	3-[2-(diethylamino)-4-oxothieno[3,2-d]pyrimidin-3(4H)-yl]-N-[2-(2-methoxyphenoxy)ethyl]propanamide	86.88	Clc1c(F)ccc(C(=O)NCC(=O)Nc2[nH]c3c(n2)cccc3)c1	17	1.04	2.6	-2.57
omega_87211	-9.07205	-13.0379	0.530391	5.45411	4.82771	-4.06345	-2.78287	5	CL7372	DC	4	2	D351-0476	7	5-{[(4-methoxyphenyl)amino]methyl}-2-(3-methylphenyl)[1,2,4]triazolo[1,5-a]pyrimidin-7(4H)-one	81.07	O(C)c1ccc(NCC=2Nc3n(C(=O)C=2)nc(-c2cc(C)ccc2)n3)cc1	8	1.66	2.81	-2.57
omega_515407	-9.07194	-13.3508	0.643029	4.961	4.19787	-3.92576	-1.59723	5	CL0455	DC	7	1	6466-1255	8	methyl 2-[([1,2,4]triazolo[1,5-a]pyrimidin-2-ylcarbonyl)amino]-4,5,6,7-tetrahydro-1-benzothiophene-3-carboxylate	98.47	O=C(OC)c1c(NC(=O)c2nn3c(n2)N=CC=C3)sc2c1CCCC2	80	1.79	2.34	-3.93
omega_90494	-9.06854	-12.2963	0.616247	5.12039	3.58485	-3.67509	-2.41859	3	CL2813A	DC	4	1	D358-0121	5	N-mesityl-5-oxo-5H-[1,3]thiazolo[3,2-a]pyrimidine-6-carboxamide	87.07	O=C(Nc1c(C)cc(C)cc1C)C=1C(=O)N2C(SC=C2)=NC=1	231	2.15	2.09	-2.01
omega_155318	-9.06801	-12.772	0.498861	4.85905	3.84944	-3.01059	-2.49279	4	CL4837	DC	7	2	E559-0105	7	N-(5-chloro-2-hydroxyphenyl)-7-methyl-5-oxo-5H-[1,3]thiazolo[3,2-a]pyrimidine-6-sulfonamide	132.75	Clc1cc(N=[SH0]([O+H]C=2C(=O)N3C(SC=C3)=NC=2C)[O-])c(O)cc1	106	1.19	0.98	-1.93
omega_284943	-9.06758	-10.0117	0.601147	4.39166	4.58406	-5.51561	-3.11713	6	CL6481	DC	5	1	G205-0904	7	N-(2-cyclohex-1-en-1-ylethyl)-5-oxo-2-pyrrolidin-1-yl-5H-[1,3,4]thiadiazolo[3,2-a]pyrimidine-6-carboxamide	102.67	O=C(NCCC1=CCCCC1)C=1C(=O)N2N=C(N3CCCC3)SC2=NC=1	84	3.46	3.18	-4.93
omega_1393959	-9.06734	-12.5846	0.431466	5.14374	2.61179	-3.12992	-1.53979	4	CL8573	NC	5	1	L454-0506	3	N-(3,5-difluorophenyl)-6-(3-fluorophenyl)nicotinamide	41.99	Fc1cc(F)cc(NC(=O)c2cnc(-c3cc(F)ccc3)cc2)c1	4	3.81	4.03	-3.92
omega_1373105	-9.06686	-12.9811	0.453334	4.24035	3.00657	-2.52799	-1.25798	5	CL8526	NC	5	1	L228-0978	5	5-(2-cyclobutyl-1,3-oxazol-5-yl)-N-(4-methylphenyl)thiophene-2-sulfonamide	108.82	[SH0]([O+H]c1sc(-c2oc(C3CCC3)nc2)cc1)([O-])=Nc1ccc(C)cc1	185	5.22	4.25	-5.94
omega_22652	-9.0664	-9.98086	0.884377	4.23246	4.46344	-4.7866	-3.87922	6	CV0299	DC	5	2	C720-0611	7	2-hydroxy-N-(3-methoxybenzyl)-8-methyl-4-oxo-4H-pyrido[1,2-a]pyrimidine-3-carboxamide	91.23	O=C(NCc1cc(OC)ccc1)C=1C(=O)N2C(=NC=1O)C=C(C)C=C2	13	0.74	1.25	-2.54
omega_296032	-9.06499	-12.5087	0.406516	5.20338	3.89858	-3.171	-2.89374	5	CL3923	DC	2	2	G339-0133	4	N-(2-phenylethyl)-1H-indazole-6-carboxamide	57.78	O=C(NCCc1ccccc1)c1cc2[nH]ncc2cc1	6	2.29	2.59	-3.84
omega_124349	-9.06493	-8.1489	0.473982	3.29484	5.31271	-5.38402	-4.61355	4	CM0132	DC	6	3	D668-0051	7	N-(3-fluorophenyl)-2-hydroxy-6-oxo-1,6-dihydropyrimidine-5-sulfonamide	116.24	S(=O)(=O)(Nc1cc(F)ccc1)C=1C(=O)NC(O)=NC=1	189	-0.46	-0.301	-0.07
omega_13618	-9.06425	-12.2497	0.45076	5.58461	4.08625	-3.64414	-3.29201	4	CL6032	DC	5	2	C660-0906	6	4-(cyclooctylamino)-6-methylfuro[2,3-d]pyrimidine-5-carboxylic acid	88.25	O=C(O)c1c(C)oc2ncnc(NC3CCCCCCC3)c12	75	-0.13	3	1.31
omega_918307	-9.06423	-13.5611	0.356904	4.93605	2.86551	-2.63676	-1.02483	4		DC	5	1	Y043-5443	5	N-(6-chloro-3-pyridyl)-2-[(1-methyl-1H-indol-4-yl)oxy]acetamide	56.15	Clc1ncc(NC(=O)COc2c3c(n(C)cc3)ccc2)cc1	30	3.06	3.06	-3.59
omega_930353	-9.06413	-8.85872	0.408894	3.04966	3.93583	-5.17515	-2.42464	3	CL1274	DC	4	1	Y200-0717	4	N~2~-(4-chlorobenzyl)-2-pyrazinecarboxamide	54.88	Clc1ccc(CNC(=O)c2nccnc2)cc1	2	1.5188	1.83	-0.73973
omega_181718	-9.06243	-13.3077	0.62455	6.22433	3.13025	-3.12295	-2.6109	5	CL6032	DC	5	1	E946-0327	6	ethyl 4-[(3,5-dimethylphenyl)amino]-6-methylfuro[2,3-d]pyrimidine-5-carboxylate	77.25	O=C(OCC)c1c(C)oc2ncnc(Nc3cc(C)cc(C)c3)c12	2	0.86	3.83	-1.54
omega_745480	-9.06202	-11.6801	1.07184	5.89552	5.901	-5.50459	-4.74572	8	CL0638	DC	4	3	K284-4095	6	4-(6-bromo-4-oxo-2-thioxo-1,4-dihydroquinazolin-3(2H)-yl)-N-[2-(1H-indol-3-yl)ethyl]butanamide	109.32	Brc1cc2C(=O)N(CCCC(=O)NCCc3c4c([nH]c3)cccc4)C(=S)Nc2cc1	27	2.46	3.88	-2.92
omega_685193	-9.06181	-14.4075	0.842846	5.76859	5.08265	-3.3004	-3.04804	8	CL2560	DC	5	2	C385-0054	8	N-benzyl-6-{[(3-methoxyphenyl)amino]sulfonyl}-N-methyl-4-oxo-1,4-dihydroquinoline-3-carboxamide	104.81	S(=O)([O-])(=Nc1cc(OC)ccc1)c1cc2C(=O)C(C(=O)N(Cc3ccccc3)C)=CNc2cc1	196	3.38	2.36	-4.67
omega_22470	-9.06176	-11.7586	0.621519	4.57903	3.56048	-3.56176	-2.50247	3	CL3531	DC	4	1	C720-0094	5	N-(3-chloro-2-methylphenyl)-4-oxo-4H-pyrido[1,2-a]pyrimidine-3-carboxamide	61.77	Clc1c(C)c(NC(=O)C=2C(=O)N3C(=NC=2)C=CC=C3)ccc1	1	2.81	1.55	-2.7
omega_1532205	-9.06137	-12.2136	0.528433	4.39147	2.89189	-2.3674	-2.29213	4	FL0002	NC	3	2	Z601-5135	4	2-(1H-1,3-benzimidazol-2-yl)-N-(5-fluoro-2-methylphenyl)acetamide	57.78	Fc1cc(NC(=O)Cc2[nH]c3c(n2)cccc3)c(C)cc1	4	3.186	3.263	-1.07
omega_1244284	-9.06072	-6.5439	0.338043	2.58289	5.04985	-5.50376	-4.98384	3	CM0132	NC	6	3	D668-0002	7	2-hydroxy-N-methyl-6-oxo-1,6-dihydropyrimidine-5-sulfonamide	116.24	S(=O)(=O)(NC)C=1C(=O)NC(O)=NC=1	11	-2.34	-2.083	1.52
omega_87110	-9.06022	-12.5588	0.557318	5.68508	4.13964	-4.06996	-2.81354	6	CL7372	DC	4	2	D351-0191	7	5-{[(4-ethylphenyl)amino]methyl}-2-(4-methoxyphenyl)[1,2,4]triazolo[1,5-a]pyrimidin-7(4H)-one	81.07	O(C)c1ccc(-c2nn3C(=O)C=C(CNc4ccc(CC)cc4)Nc3n2)cc1	147	2.19	3.27	0.65
omega_124435	-9.05837	-13.2024	0.334525	4.67614	5.18143	-3.23374	-2.81433	4	CM0132	DC	5	3	D668-0239	7	N-(2,5-dimethylphenyl)-2-hydroxy-4-methyl-6-oxo-1,6-dihydropyrimidine-5-sulfonamide	116.24	S(=O)(=O)(Nc1c(C)ccc(C)c1)C1=C(C)N=C(O)NC1=O	194	1.12	0.979	-0.31
omega_1479944	-9.05683	-12.6852	0.487279	4.94142	4.70018	-4.88293	-1.6176	4	CM0580	NC	6	0	P044-0051	8	1-phenyl-4-{[3-(2-pyridyl)-1,2,4-oxadiazol-5-yl]methyl}-1,4-dihydro-2,3-pyrazinedione	92.43	O=C1N(Cc2onc(-c3ncccc3)n2)C=CN(c2ccccc2)C1=O	111	0.242	0.382	-3.78
omega_930926	-9.05581	-10.0784	0.259588	3.16813	3.22568	-3.29479	-2.33599	2	CL1274	DC	4	1	Y200-1377	4	N~2~-cycloheptyl-2-pyrazinecarboxamide	54.88	O=C(NC1CCCCCC1)c1nccnc1	1	2.19285	2.26	-0.004108
omega_376397	-9.05551	-10.6973	0.319975	3.18223	2.98227	-3.02133	-1.82139	6		DC	7	2	1761-1821	10	N'-[(1E)-(2-hydroxyphenyl)methylene]-2-(3-nitro-1H-1,2,4-triazol-1-yl)acetohydrazide	138.22	O=[N+]([O-])c1nn(CC(=O)NN=Cc2c(O)cccc2)cn1	48	-0.2	0.65	1.16
omega_215456	-9.05486	-11.9564	0.414467	3.96309	3.59873	-3.65782	-1.4169	5	CL7899	DC	4	1	F319-0210	5	N-benzyl-4-(5-methyl-1,2,4-oxadiazol-3-yl)benzamide	68.02	O=C(NCc1ccccc1)c1ccc(-c2nc(C)on2)cc1	8	1.74	2.27	-4.34
omega_113240	-9.05361	-11.8505	0.540509	5.0812	4.19155	-4.14696	-2.86941	4	CL7372	DC	4	2	D489-0104	7	2-(4-fluorophenyl)-5-{[(3-methylphenyl)amino]methyl}[1,2,4]triazolo[1,5-a]pyrimidin-7(4H)-one	71.84	Fc1ccc(-c2nn3C(=O)C=C(CNc4c(C)cc(C)cc4)Nc3n2)cc1	215	1.68	3.04	-1.96
omega_22659	-9.05314	-11.6957	0.696166	4.58804	4.97893	-4.24512	-3.37549	9	CV0299	DC	5	2	C720-0619	7	N-[3-(diethylamino)propyl]-2-hydroxy-8-methyl-4-oxo-4H-pyrido[1,2-a]pyrimidine-3-carboxamide	85.24	O=C(NCCCN(CC)CC)C=1C(=O)N2C(=NC=1O)C=C(C)C=C2	85	0.08	0.58	-0.51
omega_124460	-9.05185	-12.87	0.318075	4.41186	5.14808	-3.14203	-2.91779	4	CM0132	DC	7	3	D668-0272	7	N~5~-(3-chloro-4-fluorophenyl)-2-hydroxy-4-methyl-6-oxo-1,6-dihydro-5-pyrimidinesulfonamide	116.24	Clc1c(F)ccc(NS(=O)(=O)C2=C(C)N=C(O)NC2=O)c1	192	0.49	0.877	-1.48
omega_863663	-9.05164	-10.1158	0.420396	3.82416	2.88854	-3.89607	-2.17286	2		DC	5	0	Y010-0476	5	6-(4-fluorobenzyl)[1,2,3]thiadiazolo[5,4-d]pyrimidin-7(6H)-one	86.69	Fc1ccc(CN2C(=O)c3nnsc3N=C2)cc1	1	2.75	2.75	-3.78
omega_22617	-9.0516	-10.9498	0.719113	4.086	4.89347	-4.19479	-3.60557	9	CV0299	DC	5	2	C720-0567	7	N-{2-[butyl(methyl)amino]ethyl}-2-hydroxy-9-methyl-4-oxo-4H-pyrido[1,2-a]pyrimidine-3-carboxamide	85.24	O=C(NCCN(CCCC)C)C=1C(=O)N2C(C(C)=CC=C2)=NC=1O	48	0.46	1.26	-0.6
omega_87165	-9.05155	-12.4571	0.588817	5.37347	4.12542	-3.85665	-2.82551	4	CL7372	DC	4	2	D351-0409	6	5-{[(4-fluorophenyl)amino]methyl}-2-(2-methylphenyl)[1,2,4]triazolo[1,5-a]pyrimidin-7(4H)-one	71.84	Fc1ccc(NCC=2Nc3n(C(=O)C=2)nc(-c2c(C)cccc2)n3)cc1	144	0.26	3.04	-2.23
omega_941990	-9.0508	-11.5813	0.422131	4.25738	3.75221	-3.78445	-2.11674	2		DC	5	1	8017-5841	5	6-benzyl-5-methyl-2-(trifluoromethyl)[1,2,4]triazolo[1,5-a]pyrimidin-7(4H)-one	59.81	FC(F)(F)c1nn2C(=O)C(Cc3ccccc3)=C(C)Nc2n1	31	3.63	3.63	-5.1
omega_258555	-9.05052	-13.8325	0.604346	4.48224	4.3739	-2.61537	-2.06312	7	CL8394	DC	7	1	F801-0419	9	methyl 2-{[(7-oxo-2-pyrrolidin-1-yl[1,3]thiazolo[4,5-d]pyrimidin-6(7H)-yl)acetyl]amino}benzoate	132.44	O=C(Nc1c(C(=O)OC)cccc1)CN1C(=O)c2sc(N3CCCC3)nc2N=C1	131	0.51	1.56	1.14
omega_1500125	-9.05046	-10.8356	0.4227	3.73371	3.81047	-3.67726	-2.50443	4	CM0615	NC	4	3	P574-0942	6	2-[2-amino-4-methyl-6-oxo-1(6H)-pyrimidinyl]-N~1~-(4-bromophenyl)acetamide	87.79	Brc1ccc(NC(=O)CN2C(N)=NC(C)=CC2=O)cc1	119	2.441	1.565	-0.94
omega_556781	-9.04901	-12.4645	0.486892	4.55958	2.00117	-2.11253	-1.51959	5		DC	3	1	8007-5530	4	5-benzoyl-N~2~-(1-naphthyl)-2-furamide	59.31	O=C(Nc1c2c(ccc1)cccc2)c1oc(C(=O)c2ccccc2)cc1	10	3.64	4.74	-4.37
omega_607441	-9.04799	-11.6473	0.335472	4.27339	3.95817	-3.02367	-2.94406	5	CL1721	DC	9	0	8017-2122	5	N~1~-[2-(1H-1,3-benzimidazol-2-yl)ethyl]-2-(4-fluorophenoxy)acetamide	112.41	Fc1ccc(OCC(=O)NCCc2[nH]c3c(n2)cccc3)cc1	32	0.0328	0.0328	-2.75
omega_1234039	-9.04673	-10.004	0.418828	3.71631	3.65574	-3.79521	-3.03835	5	CL2813A	NC	4	1	D358-0114	5	N-(3-methylbutyl)-5-oxo-5H-[1,3]thiazolo[3,2-a]pyrimidine-6-carboxamide	87.07	O=C(NCCC(C)C)C=1C(=O)N2C(SC=C2)=NC=1	144	1.95	0.63	-3.13
omega_950633	-9.0467	-12.107	0.537745	5.16983	4.23898	-3.94026	-2.94599	4	CL7372	DC	6	2	D351-0034	6	5-[(3-chloroanilino)methyl]-2-phenyl[1,2,4]triazolo[1,5-a]pyrimidin-7(4H)-one	71.84	Clc1cc(NCC=2Nc3n(C(=O)C=2)nc(-c2ccccc2)n3)ccc1	2	3.73	3.73	-5.52
omega_1271006	-9.04614	-12.654	0.598219	4.77262	6.21245	-5.21365	-2.76174	6	CL5253	NC	6	1	F236-0090	7	N-(sec-butyl)-2-[7-(ethylthio)-4-oxopyrimido[4,5-d]pyrimidin-3(4H)-yl]acetamide	112.85	S(CC)c1nc2N=CN(CC(=O)NC(CC)C)C(=O)c2cn1	19	-1.07	0.765	-0.69
omega_167914	-9.04577	-11.6548	0.821905	5.04324	4.4747	-4.18642	-3.54436	8	CL5254	DC	10	3	E726-0134	7	ethyl 4-amino-2-({2-[2-chloro-5-(trifluoromethyl)anilino]-2-oxoethyl}sulfanyl)-5-pyrimidinecarboxylate	132.5	Clc1c(NC(=O)CSc2nc(N)c(C(=O)OCC)cn2)cc(C(F)(F)F)cc1	233	4.32	3.35	-2.67
omega_379663	-9.04435	-12.3818	0.482143	4.78499	2.9289	-2.50818	-2.35038	8		DC	6	2	1910-2313	7	3-hydroxy-N'-[(1E)-(3,4,5-trimethoxyphenyl)methylene]-2-naphthohydrazide	89.38	O=C(NN=Cc1cc(OC)c(OC)c(OC)c1)c1c(O)cc2c(c1)cccc2	40	2.86	3.28	-3.03
omega_1002164	-9.04381	-13.0461	0.516839	6.03958	2.78862	-2.31359	-3.02915	3	CM4195	IC	5	1	S627-0448	5	N-cyclopropyl-6-oxo-8-(3-pyridyl)-1,3,4,6-tetrahydro-2H-quinolizine-9-carboxamide	62.3	O=C(NC1CC1)C=1C(c2cnccc2)=CC(=O)N2C=1CCCC2	40	0.25	0.25	-1.39
omega_33341	-9.04161	-14.4314	0.782444	6.34712	3.72979	-3.40361	-2.066	3	CL3585	DC	4	1	C803-0331	6	2-ethoxy-N-(12-oxo-6,7,8,9,10,12-hexahydroazepino[2,1-b]quinazolin-2-yl)benzamide	71	O=C(Nc1cc2C(=O)N3C(=Nc2cc1)CCCCC3)c1c(OCC)cccc1	77	2.23	3.32	0.23
omega_1393944	-9.04117	-12.5034	0.41015	4.72984	2.57361	-2.92338	-1.32802	4	CL8573	NC	3	1	L454-0480	3	N-(4-chloro-2-methylphenyl)-3-[(2-methyl-4-oxo-2,3,4,5-tetrahydro-1,5-benzothiazepin-7-yl)sulfonyl]propanamide	41.99	Fc1cc(-c2ncc(C(=O)Nc3cc(C)cc(C)c3)cc2)ccc1	44	4.6	4.59	-4.68
omega_471091	-9.04007	-8.40319	0.600859	3.80729	5.99055	-5.92155	-5.11403	5		DC	6	4	4491-0890	8	2,4-dihydroxybenzaldehyde (6-methyl-3-oxo-2,3-dihydro-1,2,4-triazin-5-yl)hydrazone	118.67	O=C1N=C(NN=Cc2c(O)cc(O)cc2)C(C)=NN1	41	0.78	0.84	-0.29
omega_41612	-9.03966	-13.101	0.542788	5.90602	3.74782	-4.52556	-1.60977	3	CL4403A	DC	4	1	C999-0235	6	2-(5,7-dimethyl-2-phenylpyrazolo[1,5-a]pyrimidin-6-yl)-N-(4-methoxybenzyl)acetamide	68.52	O=C(NCc1ccc(OC)cc1)CC1=C(C)n2nc(-c3ccccc3)cc2N=C1C	205	5.47	3.69	-5.39
omega_555542	-9.0395	-10.8399	0.409147	3.22829	4.11557	-3.98261	-1.97002	6	CL5633	DC	5	1	8007-2579	7	N'~1~-[(E)-1-phenylmethylidene]-2-(5-phenyl-2H-1,2,3,4-tetraazol-2-yl)acetohydrazide	85.06	O=C(NN=Cc1ccccc1)Cn1nc(-c2ccccc2)nn1	21	2.5	2.21	-1.92
omega_610558	-9.0394	-14.7833	0.362232	5.42841	1.20899	-0.927161	-0.328565	5		DC	3	0	8018-3379	3	3-methoxy-4-(1-naphthylmethoxy)benzaldehyde	35.53	O=Cc1cc(OC)c(OCc2c3c(ccc2)cccc3)cc1	61	3.8144	3.85	-5.9707
omega_915973	-9.03928	-12.9849	0.57676	4.80134	3.41321	-2.99267	-1.85302	4		DC	6	1	Y042-5537	6	N-(1-isobutyl-1H-indol-4-yl)-5-oxo-5H-[1,3]thiazolo[3,2-a]pyrimidine-6-carboxamide	92	O=C(Nc1c2c(n(CC(C)C)cc2)ccc1)C=1C(=O)N2C(SC=C2)=NC=1	30	2.19	2.19	-4.47
omega_155300	-9.0392	-13.1865	0.488985	5.20073	3.56399	-3.02807	-2.07829	1	CL4837	DC	5	1	E559-0041	6	N-(2,5-dimethylphenyl)-7-methyl-5-oxo-5H-[1,3]thiazolo[3,2-a]pyrimidine-6-sulfonamide	112.52	[SH0]([O+H]C=1C(=O)N2C(SC=C2)=NC=1C)([O-])=Nc1c(C)ccc(C)c1	1	2.24	1.56	-2.96
omega_539023	-9.03877	-12.5581	0.429221	4.82672	3.10278	-2.46491	-2.37446	6		DC	4	2	8003-8446	5	2-{2-[(E)-1-(4-fluorophenyl)methylidene]hydrazino}-N~1~-(2-naphthyl)-2-oxoacetamide	70.56	Fc1ccc(C=NNC(=O)C(=O)Nc2cc3c(cc2)cccc3)cc1	50	3.26	3.06	-4.08
omega_415249	-9.03841	-11.9816	0.349854	4.50624	2.99924	-1.97024	-2.9419	6	CL9808	DC	6	3	3237-1566	5	N'-[(1E)-(5-bromo-2-hydroxyphenyl)methylene]-3-hydroxy-1-benzothiophene-2-carbohydrazide	81.92	Brc1cc(C=NNC(=O)c2c(O)c3c(s2)cccc3)c(O)cc1	70	4.06	3.96	-5.04
omega_1525742	-9.03823	-15.4682	0.450959	6.89515	2.51137	-2.42819	-0.99935	4	CM1573	NC	6	0	T743-0103	5	5-[1-(2,5-difluorobenzyl)-1H-pyrrol-2-yl]-3-(4-pyridyl)-1,2,4-oxadiazole	56.74	Fc1c(Cn2c(-c3onc(-c4ccncc4)n3)ccc2)cc(F)cc1	75	2.422	3.025	-4.31
omega_1500383	-9.03803	-11.5455	0.547015	3.88661	4.36395	-3.79684	-2.49326	6	CM0615	NC	4	3	P574-4663	7	2-[2-amino-4-(methoxymethyl)-6-oxo-1(6H)-pyrimidinyl]-N~1~-(3,4-dimethylphenyl)acetamide	97.02	O=C(Nc1cc(C)c(C)cc1)CN1C(N)=NC(COC)=CC1=O	164	1.424	1.31	0.6
omega_386026	-9.03647	-10.2057	0.42723	3.65989	2.573	-3.45158	-2.03933	7		DC	2	2	2098-0010	4	3-(1H-indol-3-yl)-N'-[(1E,2E)-3-phenylprop-2-enylidene]propanohydrazide	57.25	O=C(NN=CC=Cc1ccccc1)CCc1c2c([nH]c1)cccc2	57	3.02	3.17	-4.74
omega_1081386	-9.03613	-10.2982	0.449611	3.66497	2.73308	-3.1093	-2.47625	6	CM4373	IC	5	2	T161-0347	5	N-{2-[1-(cyclopropylmethyl)-5-methyl-1H-imidazol-2-yl]ethyl}-N'-ethylurea	58.95	O=C(NCCc1n(CC2CC2)c(C)cn1)NCC	7	0.33	0.89	-5.5
omega_42006	-9.03599	-10.9072	0.383047	4.31024	3.18839	-3.00534	-3.00514	3		DC	6	2	7287-0530	6	3-(3-nitroanilino)-1(2H)-isoquinolinone	86.95	O=[N+]([O-])c1cc(NC=2NC(=O)c3c(cccc3)C=2)ccc1	2	3.87	3.87	-4.99
omega_915798	-9.03508	-11.5413	0.518406	4.43701	3.8467	-3.89599	-2.39994	5		DC	5	1	Y042-5323	5	N-{2-[(4-chlorophenyl)sulfanyl]ethyl}-5-oxo-5H-[1,3]thiazolo[3,2-a]pyrimidine-6-carboxamide	112.37	Clc1ccc(SCCNC(=O)C=2C(=O)N3C(SC=C3)=NC=2)cc1	30	2.32	2.32	-4.61
omega_728895	-9.03448	-13.1217	0.476368	4.67598	3.93059	-3.97319	-1.0225	5	CL6766	DC	5	1	J061-1299	5	2-[(5-methyl[1,3]oxazolo[4,5-b]pyridin-2-yl)thio]-N-1-naphthylacetamide	93.32	S(CC(=O)Nc1c2c(ccc1)cccc2)c1oc2c(n1)nc(C)cc2	189	5.28	3.57	-5.4
omega_776089	-9.03437	-14.6936	0.594799	5.25336	2.6298	-0.871904	-1.94685	6	CL1782	DC	4	2	K807-4527	8	3-methyl-1-(4-{[2-(1-naphthylamino)ethyl]amino}-3-nitrophenyl)pyrrolidine-2,5-dione	107.26	O=[N+]([O-])c1c(NCCNc2c3c(ccc2)cccc3)ccc(N2C(=O)C(C)CC2=O)c1	22	3.12	3.59	-4.21
omega_376865	-9.03346	-11.571	0.296611	4.17243	2.55478	-2.88666	-1.5996	3		DC	3	1	1763-0523	3	N-(3-Chloro-2-methyl-phenyl)-nicotinamide	41.99	Clc1c(C)c(NC(=O)c2cnccc2)ccc1	9	3.03	2.61	-2.55
omega_516553	-9.03269	-13.576	0.331276	5.67777	2.33622	-2.25892	-1.54305	3		DC	5	2	6540-0016	4	2-[5-(3-bromophenyl)-2-furyl]-1,2,5,6,7,8-hexahydro[1]benzothieno[2,3-d]pyrimidin-4-ol	57.76	Brc1cc(-c2oc(C3N=C(O)c4c(sc5c4CCCC5)N3)cc2)ccc1	88	6.01	5.8	-3.07
omega_1177852	-9.03241	-11.7023	0.520313	4.49441	3.23322	-2.61215	-2.96591	3	CL0865	DC	4	3	V026-3509	4	4-(3-chlorophenyl)-N~5~-cyclopropyl-6-methyl-2-thioxo-1,2,3,4-tetrahydro-5-pyrimidinecarboxamide	85.25	Clc1cc(C2C(C(=O)NC3CC3)=C(C)NC(=S)N2)ccc1	2	2.59	2.59	-4.13
omega_1081392	-9.03226	-10.5557	0.515928	3.8524	2.72503	-3.07977	-2.49018	7	CM4373	IC	5	2	T161-0361	5	N-{2-[1-(cyclopropylmethyl)-5-methyl-1H-imidazol-2-yl]ethyl}-N'-isobutylurea	58.95	O=C(NCC(C)C)NCCc1n(CC2CC2)c(C)cn1	111	1.2	1.76	-6.18
omega_1255542	-9.03175	-11.643	0.619164	4.97091	4.60183	-4.75026	-2.83037	5	CL5555	NC	5	1	E714-0033	7	N-(4-fluorobenzyl)-2-(4-oxo-7,8,9,10-tetrahydro-4H-azepino[1,2-e]purin-3(6H)-yl)acetamide	79.59	Fc1ccc(CNC(=O)CN2C(=O)c3nc4n(c3N=C2)CCCCC4)cc1	18	1.51	1.21	0.61
omega_62095	-9.03167	-11.4047	0.552347	4.48485	4.84628	-4.14042	-3.37002	8	CL5013	DC	5	2	D205-0353	7	N-(6-benzyl-7-hydroxy-5-methyl[1,2,4]triazolo[1,5-a]pyrimidin-2-yl)-2-phenylbutanamide	92.41	O=C(Nc1nn2C(O)=C(Cc3ccccc3)C(C)=Nc2n1)C(CC)c1ccccc1	128	3.02	5.03	-1.78
omega_417724	-9.0295	-13.4488	0.580039	5.84216	3.79794	-4.08826	-1.71257	8		DC	5	1	3253-7506	6	2-{[1-(4-methylbenzyl)-1H-benzimidazol-2-yl]thio}-N'-[(1E)-pyridin-2-ylmethylene]acetohydrazide	72.17	S(CC(=O)NN=Cc1ncccc1)c1n(Cc2ccc(C)cc2)c2c(n1)cccc2	79	3.68	5.25	-4.82
omega_258591	-9.02908	-12.7296	0.592757	5.27378	4.00473	-3.70272	-2.46805	6	CL8394	DC	6	1	F801-0466	7	N-(4-chlorobenzyl)-2-(7-oxo-2-pyrrolidin-1-yl[1,3]thiazolo[4,5-d]pyrimidin-6(7H)-yl)acetamide	106.14	Clc1ccc(CNC(=O)CN2C(=O)c3sc(N4CCCC4)nc3N=C2)cc1	77	-0.13	2.37	-2
omega_1083707	-9.02793	-13.4918	0.50354	6.07565	2.51829	-2.2167	-2.41687	4	CM4194	IC	4	1	T508-0147	4	N-isobutyl-5-oxo-7-phenyl-1,2,3,5-tetrahydro-8-indolizinecarboxamide	49.41	O=C(NCC(C)C)C=1C(c2ccccc2)=CC(=O)N2C=1CCC2	41	1.88	1.88	-2.3
omega_685317	-9.02717	-13.9609	0.666073	5.37665	4.53149	-2.61737	-3.02312	7	CL2560	DC	4	2	C385-0681	7	6-{[(3,5-dimethylphenyl)amino]sulfonyl}-N,N-diethyl-4-oxo-1,4-dihydroquinoline-3-carboxamide	95.58	S(=O)([O-])(=Nc1cc(C)cc(C)c1)c1cc2C(=O)C(C(=O)N(CC)CC)=CNc2cc1	131	4.19	2.47	-5.82
omega_366420	-9.02696	-14.7477	0.40805	4.28122	5.1948	-1.56651	-2.59683	6		DC	5	4	1391-0632	7	(2E)-2-[(anilinocarbonothioyl)hydrazono]-8-methoxy-2H-chromene-3-carboxamide	130.06	S=C(NN=C1C(C(=O)N)=Cc2c(c(OC)ccc2)O1)Nc1ccccc1	3	3.38	3.47	-2.86
omega_124456	-9.02696	-10.3546	0.416692	4.03746	5.28937	-4.64238	-3.77355	4	CM0132	DC	8	3	D668-0268	7	2-hydroxy-4-methyl-6-oxo-N-(2,4,5-trichlorophenyl)-1,6-dihydropyrimidine-5-sulfonamide	116.24	Clc1c(Cl)cc(NS(=O)(=O)C2=C(C)N=C(O)NC2=O)c(Cl)c1	162	1.23	2	-2.7
omega_713404	-9.02616	-12.1422	0.618672	5.68613	5.07286	-5.37784	-2.88382	3	CL2482A	DC	6	1	G881-0078	6	N-cyclopentyl-2-[4-oxopyrido[3',2':4,5]thieno[3,2-d]pyrimidin-3(4H)-yl]acetamide	102.9	O=C(NC1CCCC1)CN1C(=O)c2sc3ncccc3c2N=C1	4	2.52	2.52	-4.23
omega_798637	-9.02477	-12.7025	0.335777	4.5003	2.43683	-2.33894	-1.2562	2		DC	5	1	8016-7749	5	1-methyl-N~4~-[3-(trifluoromethyl)phenyl]-1H-pyrazole-4-sulfonamide	72.37	S(=O)(=O)(Nc1cc(C(F)(F)F)ccc1)c1cn(C)nc1	31	1.11	1.68	-3.88
omega_134847	-9.02362	-13.692	0.513854	5.37621	4.44523	-3.9958	-1.67114	5	CL4577	DC	5	1	E016-0737	8	2-[2-(2-furyl)-4-oxopyrazolo[1,5-d][1,2,4]triazin-5(4H)-yl]-N-(2-methylcyclohexyl)acetamide	92.73	O=C(NC1C(C)CCCC1)CN1C(=O)c2n(nc(-c3occc3)c2)C=N1	40	1.82	1.3	-1.44
omega_375804	-9.02347	-12.0472	0.3334	4.94405	2.74371	-2.93151	-2.06596	6		DC	5	2	1761-0263	5	2-(2,6-dibromo-4-methylanilino)-N'-[(E)-1-(2-furyl)methylidene]acetohydrazide	66.63	Brc1c(NCC(=O)NN=Cc2occc2)c(Br)cc(C)c1	77	4.08	3.45	-3.01
omega_1457485	-9.02318	-13.2518	0.437086	5.43703	3.13612	-3.21088	-1.57074	6	CL9640	NC	5	1	M337-0419	7	ethyl 4-({[1-(2-chlorophenyl)-5-pyridin-3-yl-1H-1,2,3-triazol-4-yl]carbonyl}amino)piperidine-1-carboxylate	85.84	O=C(Nc1nccc(C)c1)Cn1c2c(cc1)ccc(-c1oc(CC)nn1)c2	1	2.14	2.51	-2.51
omega_1361789	-9.02289	-13.0397	0.421093	4.3135	4.16136	-2.19533	-2.68378	9	CL1604	NC	5	4	K844-1080	7	6-hydroxy-N-{2-[(2-hydroxyethyl)amino]ethyl}-4-oxo-1,2-dihydro-4H-pyrrolo[3,2,1-ij]quinoline-5-carboxamide	101.9	O=C(NCCNCCO)C=1C(=O)N2c3c(C=1O)cccc3CC2	5	-0.61	-0.47	0.25
omega_22588	-9.02288	-9.72978	0.671342	3.94562	5.44251	-4.28728	-5.06528	9	CV0299	DC	6	3	C720-0521	8	2-hydroxy-N-[2-(2-hydroxyethoxy)ethyl]-9-methyl-4-oxo-4H-pyrido[1,2-a]pyrimidine-3-carboxamide	111.46	O=C(NCCOCCO)C=1C(=O)N2C(C(C)=CC=C2)=NC=1O	4	-2.12	-0.88	-1.99
omega_528542	-9.02286	-10.4355	0.438138	3.60981	3.92201	-3.08042	-3.47686	2		DC	4	1	7747-0545	5	N-(3-oxido-3,4-dihydro-2H-1,5,3-benzodioxaphosphepin-3-yl)pyridin-2-amine	70.26	O=P1(Nc2ncccc2)COc2c(OC1)cccc2	85	-0.41	2.03	-0.36
omega_1012558	-9.02283	-12.5047	0.183574	5.42454	1.51499	-2.1995	-1.44169	4	CM4363	IC	4	0	S694-1370	4	4-{1-[1-(cyclohexylmethyl)tetrahydro-1H-pyrrol-3-yl]-5-methyl-1H-imidazol-2-yl}pyridine	33.95	C(N1CC(n2c(-c3ccncc3)ncc2C)CC1)C1CCCCC1	47	1.18	3.12	-3.93
omega_652717	-9.02262	-10.7692	0.410398	3.80323	3.62849	-3.99053	-2.105	2	CL5403	DC	3	1	C200-9587	5	6-benzyl-2-methyl-5-thioxo-2,4,5,6-tetrahydro-7H-pyrazolo[4,3-d]pyrimidin-7-one	82.25	S=C1N(Cc2ccccc2)C(=O)c2nn(C)cc2N1	77	1.33	1.971	-4.31
omega_509982	-9.02094	-10.7777	0.582897	4.17533	3.30325	-4.17585	-2.12888	6	CL7212	DC	6	1	6228-1376	6	5-[(4-bromo-1H-pyrazol-1-yl)methyl]-N-(3-cyano-5,6,7,8-tetrahydro-4H-cyclohepta[b]thien-2-yl)-2-furamide	83.85	Brc1cn(Cc2oc(C(=O)Nc3c(C#N)c4c(s3)CCCCC4)cc2)nc1	1	3.06	4.21	-4.08
omega_1297809	-9.02093	-11.9831	0.381128	4.18963	3.42454	-3.63751	-1.39559	4	CL8418	NC	8	1	F886-0047	6	N-(2,3-dimethylphenyl)-5-[5-(trifluoromethyl)isoxazol-3-yl]furan-2-sulfonamide	93.72	S(=O)(=O)(Nc1c(C)c(C)ccc1)c1oc(-c2noc(C(F)(F)F)c2)cc1	232	3.35	4.44	-4.61
omega_375829	-9.02026	-11.164	0.390318	4.50402	2.85293	-3.30358	-2.29992	6		DC	3	2	1761-0326	4	2-(1-naphthylamino)-N'-[(E)-1-(2-thienyl)methylidene]acetohydrazide	53.49	O=C(NN=Cc1sccc1)CNc1c2c(ccc1)cccc2	71	3.34	3.26	-4.95
omega_919028	-9.01999	-11.902	0.698854	5.5052	2.99905	-3.3665	-2.95461	3		DC	4	2	Y043-6342	4	N-phenethyl-1,3,4,9-tetrahydro-2H-beta-carboline-2-carboxamide	48.13	O=C(NCCc1ccccc1)N1Cc2[nH]c3c(c2CC1)cccc3	30	4.32	4.32	-5.17
omega_1233763	-9.01986	-12.62	0.548372	5.6137	4.2433	-3.83142	-2.97383	5	CL7372	NC	4	2	D351-0326	6	2-(4-tert-butylphenyl)-5-{[(3-chloro-4-methylphenyl)amino]methyl}[1,2,4]triazolo[1,5-a]pyrimidin-7(4H)-one	71.84	Clc1c(C)ccc(NCC=2Nc3n(C(=O)C=2)nc(-c2ccc(C(C)(C)C)cc2)n3)c1	106	4.13	4.9	-5.01
omega_375921	-9.01884	-10.9395	0.293258	4.14003	3.46499	-3.77516	-2.20241	6		DC	4	2	1761-0494	5	2-(4-chloro-2-methylanilino)-N'-[(E)-1-(2-furyl)methylidene]acetohydrazide	66.63	Clc1cc(C)c(NCC(=O)NN=Cc2occc2)cc1	19	3.5	2.62	-2.49
omega_87113	-9.01881	-13.0271	0.557308	5.16864	4.28416	-3.57822	-2.42356	6	CL7372	DC	5	2	D351-0194	8	2-(4-methoxyphenyl)-5-{[(2-methoxyphenyl)amino]methyl}[1,2,4]triazolo[1,5-a]pyrimidin-7(4H)-one	90.3	O(C)c1c(NCC=2Nc3n(C(=O)C=2)nc(-c2ccc(OC)cc2)n3)cccc1	167	1.54	2.31	-2.14
omega_22624	-9.0175	-9.51969	0.560159	3.12318	4.50966	-4.26725	-3.42356	6	CV0299	DC	5	2	C720-0575	7	2-hydroxy-N-(2-methoxyethyl)-8-methyl-4-oxo-4H-pyrido[1,2-a]pyrimidine-3-carboxamide	91.23	O=C(NCCOC)C=1C(=O)N2C(=NC=1O)C=C(C)C=C2	2	-1.65	-0.45	1.56
omega_376089	-9.01614	-11.5408	0.428006	3.97541	3.51001	-3.14341	-2.24533	6		DC	5	2	1761-0868	5	N-(2-methylphenyl)-4-oxo-4-{2-[(E)-1-(2-thienyl)methylidene]hydrazino}butanamide	98.8	O=C(N/N=C/c1sccc1)CCC(=O)Nc1c(C)cccc1	10	2.72	2.72	-4
omega_592862	-9.01507	-12.6287	0.347395	4.82374	2.30367	-1.4687	-2.39252	3		DC	3	3	8014-4643	3	2-amino-N~1~-(1-naphthyl)benzamide	55.12	O=C(Nc1c2c(ccc1)cccc2)c1c(N)cccc1	6	2.3	2.3	-4.82
omega_14982	-9.01438	-13.5884	0.421941	5.1216	4.28757	-2.30431	-2.95275	6	CL3447	DC	7	1	C679-3292	6	2-{[(2-ethyl-5-oxo-5H-[1,3,4]thiadiazolo[3,2-a]pyrimidin-7-yl)methyl]thio}benzoic acid	132.93	S(CC=1N=C2SC(CC)=NN2C(=O)C=1)c1c(C(=O)O)cccc1	1	-1.97	3.02	-1.74
omega_147012	-9.01426	-12.5741	0.682419	5.07602	3.00929	-3.05488	-2.15297	3	CL4819	DC	4	0	E243-0021	6	3-[2-(2,3-dihydro-1H-indol-1-yl)-2-oxoethyl][1]benzofuro[3,2-d]pyrimidin-4(3H)-one	66.12	O=C(CN1C(=O)c2oc3c(c2N=C1)cccc3)N1c2c(cccc2)CC1	77	1.4	1.8	-2.35
omega_539951	-9.01345	-11.9523	0.318533	4.54097	3.09098	-2.39769	-2.61395	6		DC	5	2	8004-0064	5	N~1~-(4-chloro-2-methylphenyl)-2-{2-[(E)-1-(3-chlorophenyl)methylidene]hydrazino}-2-oxoacetamide	70.56	Clc1cc(C)c(NC(=O)C(=O)NN=Cc2cc(Cl)ccc2)cc1	22	3.47	3.76	-2.21
omega_60547	-9.01343	-11.6863	0.441562	3.95756	4.27372	-3.62737	-2.3726	4	CL5637	DC	4	2	D169-0096	6	N-cyclohexyl-N'-{[3-(3-methylphenyl)-1,2,4-oxadiazol-5-yl]methyl}urea	80.05	O=C(NCc1onc(-c2cc(C)ccc2)n1)NC1CCCCC1	96	3.08	2.88	-4.55
omega_600239	-9.01342	-10.428	0.280124	3.77507	5.04476	-4.06156	-3.62378	2	CL0962	DC	5	2	8015-6484	5	N~1~-ethyl-4-oxo-3,4-dihydro-1-phthalazinecarboxamide	70.56	O=C(NCC)C1=NNC(=O)c2c1cccc2	31	1.37	1.37	-2.63
omega_532817	-9.01327	-13.3281	0.328771	5.72541	1.7161	-1.72411	-1.73132	7		DC	8	2	8002-3763	5	2-(2,6-dibromo-4-methylphenoxy)-N'~1~-[(E)-1-(4-hydroxy-3,5-diiodophenyl)methylidene]acetohydrazide	70.92	Ic1c(O)c(I)cc(C=NNC(=O)COc2c(Br)cc(C)cc2Br)c1	1	3.7	5.39	-2.4
omega_35668	-9.01316	-12.1657	0.500607	4.32698	3.74271	-2.96343	-2.4543	6	CL6691	DC	4	2	C875-1226	5	N-(2-ethyl-6-methylphenyl)-2-(3H-imidazo[4,5-c]pyridin-2-ylthio)acetamide	95.97	S(CC(=O)Nc1c(CC)cccc1C)c1[nH]c2c(n1)ccnc2	163	2.82	3.34	-1.01
omega_155353	-9.01287	-13.6565	0.523445	5.06784	3.60256	-2.75446	-1.79578	1	CL4837	DC	6	1	E559-0204	6	N-(5-chloro-2-methylphenyl)-7-methyl-5-oxo-5H-[1,3]thiazolo[3,2-a]pyrimidine-6-sulfonamide	112.52	Clc1cc(N=[SH0]([O+H]C=2C(=O)N3C(SC=C3)=NC=2C)[O-])c(C)cc1	8	2.29	1.74	-3.31
omega_865890	-9.01282	-11.9	0.631077	4.52172	5.41474	-4.47588	-3.20449	2	CL2120	DC	6	3	Y020-1363	6	N-[4-amino-6-(3-methyl-1-benzofuran-2-yl)-1,3,5-triazin-2-yl]-N-(2,3-dimethylphenyl)amine	89.86	N(c1nc(N)nc(-c2c(C)c3c(o2)cccc3)n1)c1c(C)c(C)ccc1	43	6.073	4.78	-3.5144
omega_1222945	-9.01245	-12.7893	0.468537	5.08833	6.12503	-4.9535	-2.95159	5	CL0015	NC	8	1	C679-2583	7	2-(ethylthio)-7-{[(4-methyl-6-oxo-1,6-dihydropyrimidin-2-yl)thio]methyl}-5H-[1,3,4]thiadiazolo[3,2-a]pyrimidin-5-one	162.39	S(CC)C=1SC=2N(C(=O)C=C(CSC3=NC(C)=CC(=O)N3)N=2)N=1	98	-0.71	2.79	-2.15
omega_479653	-9.01229	-11.7292	0.557312	5.669	5.10743	-3.79959	-4.81729	6		DC	5	4	4833-0043	7	4,4'-[(4-methoxyphenyl)methylene]bis(3-methyl-1H-pyrazol-5-ol)	107.05	O(C)c1ccc(C(c2c(O)[nH]nc2C)c2c(O)[nH]nc2C)cc1	3	1.89	2.24	0.16
omega_1289490	-9.01162	-12.3444	0.657792	4.97082	2.97287	-2.95085	-2.31786	3	CL7852	NC	4	1	F692-0033	5	N-(2,3-dimethylphenyl)-4-oxo-4H-[1,3]thiazino[3,2-a]benzimidazole-2-carboxamide	89.29	O=C(Nc1c(C)c(C)ccc1)C=1Sc2n(C(=O)C=1)c1c(n2)cccc1	4	1.63	4.13	-2.7
omega_950511	-9.01138	-12.2056	0.361962	4.4647	4.56869	-2.83753	-3.36362	4	CL1273	DC	7	2	C612-0740	7	3-[(5-chloro-2-methoxyanilino)carbonyl]-2-pyrazinecarboxylic acid	101.41	Clc1cc(NC(=O)c2c(C(=O)O)nccn2)c(OC)cc1	1	-0.0748	3.08	-3.53
omega_1341312	-9.01117	-12.4042	0.754088	6.05067	5.08184	-5.59426	-2.89931	4	CL2482A	NC	5	1	G881-0169	6	N-cyclohexyl-2-(7,9-dimethyl-4-oxopyrido[3',2':4,5]thieno[3,2-d]pyrimidin-3(4H)-yl)acetamide	102.9	O=C(NC1CCCCC1)CN1C(=O)c2sc3nc(C)cc(C)c3c2N=C1	94	1.23	2.34	-2.11
omega_284878	-9.01087	-8.87649	0.47491	3.64111	4.62697	-5.78158	-3.09578	6	CL6481	DC	6	1	G205-0672	8	N-butyl-2-morpholin-4-yl-5-oxo-5H-[1,3,4]thiadiazolo[3,2-a]pyrimidine-6-carboxamide	111.9	O=C(NCCCC)C=1C(=O)N2N=C(N3CCOCC3)SC2=NC=1	11	1.02	1.41	-3.67
omega_1291809	-9.0107	-13.0275	0.350942	4.70372	3.63295	-1.95929	-2.71149	3	CL8342	NC	3	2	F731-0256	5	N-(8-methyl-11-oxo-10,11-dihydrodibenzo[b,f][1,4]oxazepin-2-yl)propanamide	67.43	O=C(Nc1cc2C(=O)Nc3c(Oc2cc1)ccc(C)c3)CC	22	2.58	2.63	-1.87
omega_87062	-9.01059	-12.462	0.513108	5.36193	4.55378	-4.04986	-2.92752	5	CL7372	DC	5	2	D351-0100	7	2-(4-chlorophenyl)-5-{[(3-methoxyphenyl)amino]methyl}[1,2,4]triazolo[1,5-a]pyrimidin-7(4H)-one	81.07	Clc1ccc(-c2nn3C(=O)C=C(CNc4cc(OC)ccc4)Nc3n2)cc1	126	2.13	2.99	-3.58
omega_87059	-9.00885	-12.383	0.590543	5.2405	3.94277	-3.72203	-2.67764	4	CL7372	DC	4	2	D351-0094	6	2-(4-chlorophenyl)-5-{[(2,4-dimethylphenyl)amino]methyl}[1,2,4]triazolo[1,5-a]pyrimidin-7(4H)-one	71.84	Clc1ccc(-c2nn3C(=O)C=C(CNc4c(C)cc(C)cc4)Nc3n2)cc1	137	3.4	3.98	-3.48
omega_419727	-9.00841	-8.22091	0.63521	4.88185	5.64715	-7.65919	-4.29253	5		DC	4	2	3254-3505	7	3-(1-methyl-1H-pyrrol-2-yl)-N'~5~-[(E)-1-(2-pyridyl)methylidene]-1H-pyrazole-5-carbohydrazide	87.96	O=C(NN=Cc1ncccc1)c1[nH]nc(-c2n(C)ccc2)c1	55	1.69	2.24	-0.02
omega_375828	-9.00753	-11.6272	0.274864	4.12523	2.25345	-1.8885	-2.14536	7		DC	2	2	1761-0325	4	2-(1-naphthylamino)-N'-[(E,2E)-3-phenyl-2-propenylidene]acetohydrazide	53.49	O=C(NN=CC=Cc1ccccc1)CNc1c2c(ccc1)cccc2	67	4.16	3.23	-5.07
omega_375800	-9.00749	-12.7066	0.358698	4.96136	2.83228	-1.63648	-2.81677	7		DC	7	3	1761-0255	8	2-(2,6-dibromo-4-methylanilino)-N'-[(E)-1-(2-hydroxy-5-nitrophenyl)methylidene]acetohydrazide	119.54	Brc1c(NCC(=O)NN=Cc2c(O)ccc([N+](=O)[O-])c2)c(Br)cc(C)c1	146	4.66	3.68	-4.45
omega_900475	-9.00674	-12.0033	0.739906	6.67899	3.00316	-3.67995	-3.74559	6		DC	4	3	Y040-3257	4	N~1~-[2-(5-chloro-1H-indol-3-yl)ethyl]-3-(1H-indol-3-yl)propanamide	60.68	Clc1cc2c(CCNC(=O)CCc3c4c([nH]c3)cccc4)c[nH]c2cc1	37	3.393	4.25	-5.8713
omega_987364	-9.00652	-13.7898	0.499917	5.31392	4.42666	-3.91212	-1.54512	5	CM3561	IC	7	1	S518-0371	7	1H-indol-5-yl(3-{5-[(4-methylphenoxy)methyl]-1,2,4-oxadiazol-3-yl}-1-azetanyl)methanone	84.25	O=C(N1CC(c2nc(COc3ccc(C)cc3)on2)C1)c1cc2c([nH]cc2)cc1	81	2.5	2.5	-4.76
omega_509594	-9.00492	-9.84514	0.428093	4.28111	3.85029	-4.99118	-2.72809	7		DC	4	2	6220-6346	5	3-(2-hydroxyphenyl)-N'-[(1E)-(6-methylpyridin-2-yl)methylene]propanohydrazide	74.58	O=C(NN=Cc1nc(C)ccc1)CCc1c(O)cccc1	29	1.96	3.03	-0.65
omega_49107	-9.00465	-12.3823	0.503013	5.02143	5.09779	-4.38001	-2.86453	3	CL4994	DC	5	3	D058-0266	7	8-(1-Methyl-1H-benzoimidazol-2-ylmethylsulfanyl)-9H-purin-6-ylamine	123.6	S(Cc1n(C)c2c(n1)cccc2)c1[nH]c2ncnc(N)c2n1	117	3.34	2	-4.11
omega_1233762	-9.00449	-12.3642	0.583406	5.53417	4.26262	-4.0215	-2.99903	5	CL7372	NC	3	2	D351-0318	6	2-(4-tert-butylphenyl)-5-{[(3,4-dimethylphenyl)amino]methyl}[1,2,4]triazolo[1,5-a]pyrimidin-7(4H)-one	71.84	O=C1n2nc(-c3ccc(C(C)(C)C)cc3)nc2NC(CNc2cc(C)c(C)cc2)=C1	125	2.42	4.72	-4.61
omega_22608	-9.0044	-10.485	0.664662	3.76664	4.95022	-4.16357	-3.73734	8	CV0299	DC	5	2	C720-0557	7	N-[2-(diethylamino)ethyl]-2-hydroxy-9-methyl-4-oxo-4H-pyrido[1,2-a]pyrimidine-3-carboxamide	85.24	O=C(NCCN(CC)CC)C=1C(=O)N2C(C(C)=CC=C2)=NC=1O	54	-0.35	0.63	-0.25
omega_538960	-9.00403	-11.4823	0.175114	3.98777	2.65484	-1.92092	-2.41857	7		DC	4	2	8003-8343	5	N'~1~-[(E)-1-(2-hydroxy-5-methylphenyl)methylidene]-2-(3-methylphenoxy)acetohydrazide	70.92	O=C(NN=Cc1c(O)ccc(C)c1)COc1cc(C)ccc1	19	2.59	3.22	-3.63
omega_802177	-9.00401	-14.6168	0.506682	6.56206	0.899714	-1.13984	-1.21578	8	CL9580	DC	3	0	V001-4441	3	1-(5-benzyl-1,3,4,5-tetrahydro-2H-pyrido[4,3-b]indol-2-yl)-1-octanone	25.24	O=C(CCCCCCC)N1Cc2c3c(n(Cc4ccccc4)c2CC1)cccc3	7	7.04	7.04	-6.18
omega_1509688	-9.00318	-14.6895	0.566682	6.5513	2.6995	-2.1818	-1.94931	7	CM1218	NC	4	1	P797-0326	6	2-(4-ethylphenyl)-5-[2-hydroxy-2-(2-methoxyphenyl)ethyl]pyrazolo[1,5-a]pyrazin-4(5H)-one	67.59	O(C)c1c(C(O)CN2C(=O)c3n(nc(-c4ccc(CC)cc4)c3)C=C2)cccc1	84	4.661	3.352	-5.6
omega_1491226	-9.00262	-13.1408	0.385576	4.79434	3.6815	-2.83094	-1.89231	4	CM0256	NC	3	2	P277-1161	6	N-(3-cyclobutyl[1,2,4]triazolo[4,3-a]pyridin-8-yl)-1H-indole-2-carboxamide	75.08	O=C(NC=1c2n(c(C3CCC3)nn2)C=CC=1)c1[nH]c2c(c1)cccc2	15	2.714	3.426	-5.03
omega_1291789	-9.00153	-13.2055	0.387117	4.80105	3.60027	-1.9258	-2.65867	4	CL8342	NC	3	2	F731-0209	5	N-(8-methyl-11-oxo-10,11-dihydrodibenzo[b,f][1,4]oxazepin-2-yl)butanamide	67.43	O=C(Nc1cc2C(=O)Nc3c(Oc2cc1)ccc(C)c3)CCC	46	2.66	3.08	-2.12
omega_177065	-9.00129	-13.1356	0.441693	5.19803	2.44172	-1.80362	-2.14346	4	CL1509	DC	4	2	E869-0187	6	3-[(1-ethyl[1,2,4]triazolo[4,3-a]quinoxalin-4-yl)amino]phenol	75.34	Oc1cc(NC2=Nc3c(-n4c(CC)nnc24)cccc3)ccc1	82	1.9	3.95	-0.16
omega_22585	-9.00117	-9.31352	0.588769	3.59708	4.9714	-4.36519	-4.4797	6	CV0299	DC	5	3	C720-0518	7	2-hydroxy-N-(2-hydroxypropyl)-9-methyl-4-oxo-4H-pyrido[1,2-a]pyrimidine-3-carboxamide	102.23	O=C(NCC(O)C)C=1C(=O)N2C(C(C)=CC=C2)=NC=1O	45	-1.53	-0.37	-0.4
omega_22696	-9.00085	-12.1028	0.591973	4.29735	4.12798	-3.76626	-2.14906	6	CV0299	DC	4	2	C720-0666	6	2-hydroxy-4-oxo-N-(2-phenylethyl)-4H-pyrido[1,2-a]pyrimidine-3-carboxamide	82	O=C(NCCc1ccccc1)C=1C(=O)N2C(=NC=1O)C=CC=C2	44	-0.38	1.14	-1.41
omega_947277	-9.00062	-8.40242	0.166761	3.64365	2.70434	-4.00135	-3.1116	2		DC	3	3	8020-2683	3	4-(1H-pyrazol-4-yl)aniline	54.7	Nc1ccc(-c2c[nH]nc2)cc1	31	1.38	1.38	-2.66
omega_376280	-9.00011	-11.538	0.293453	4.04455	2.70746	-1.80602	-2.70158	7		DC	4	3	1761-1414	5	N'-[(E)-1-(5-chloro-2-hydroxyphenyl)methylidene]-2-(2-toluidino)acetohydrazide	73.72	Clc1cc(C=NNC(=O)CNc2c(C)cccc2)c(O)cc1	318	3.16	2.95	-2.29
omega_955521	-8.99946	-9.69318	0.785367	4.16785	5.20836	-5.41796	-4.04989	4		DC	6	3	Y043-4679	6	N~3~-[2-(1H-1,3-benzimidazol-2-yl)ethyl]-1,4,5,6,7,8-hexahydrocyclohepta[c]pyrazole-3-carboxamide	86.46	O=C(NCCc1[nH]c2c(n1)cccc2)c1n[nH]c2c1CCCCC2	30	2.88	2.91	-3.94
omega_379668	-8.99942	-13.0262	0.337784	5.23613	2.42107	-1.78943	-2.17877	6		DC	4	2	1910-2347	5	3-hydroxy-N'-[(1E)-(4-methoxy-1-naphthyl)methylene]-2-naphthohydrazide	70.92	O=C(NN=Cc1c2c(c(OC)cc1)cccc2)c1c(O)cc2c(c1)cccc2	27	3.81	4.22	-4.12
omega_609978	-8.99896	-11.1934	0.391354	3.55209	3.40659	-3.58513	-1.57046	5		DC	5	1	8018-2487	5	ethyl 2-{5-[3-(trifluoromethyl)phenyl]-4H-1,2,4-triazol-3-yl}acetate	67.87	FC(F)(F)c1cc(-c2[nH]c(CC(=O)OCC)nn2)ccc1	38	2.05234	0.94	-3.6107
omega_1525675	-8.99873	-11.1897	0.288766	4.50074	2.43109	-3.47617	-1.55347	4	CM1572	NC	5	0	T742-0179	5	5-benzyl-3-[(2-methyl-1H-imidazol-1-yl)methyl]-1,2,4-oxadiazole	56.74	C(n1c(C)ncc1)c1nc(Cc2ccccc2)on1	1	0.62	0.67	-2.57
omega_1431654	-8.99829	-11.7928	0.723813	3.9226	5.68746	-4.05777	-3.48155	8	CL9020	NC	4	3	L879-0279	6	1-(1-ethyl-3-methyl-1H-pyrazolo[3,4-c]pyridin-7-yl)-N-[3-(2-ethylpiperidin-1-yl)propyl]piperidine-4-carboxamide	86.88	Fc1ccc(C(=O)NC(C(=O)Nc2[nH]c3c(n2)cccc3)CCC)cc1	131	1.92	3.4	-2.98
omega_902635	-8.99816	-13.2002	0.569185	5.23065	2.58663	-2.34134	-1.84311	2		DC	5	0	Y040-5995	5	3-{2-[3,4-dihydro-2(1H)-isoquinolinyl]-2-oxoethyl}-4(3H)-quinazolinone	52.98	O=C(CN1C(=O)c2c(N=C1)cccc2)N1Cc2c(cccc2)CC1	37	3.12	3.12	-4.58
omega_782297	-8.99765	-11.8181	0.46452	4.22252	3.5464	-2.90024	-2.5127	1	CL4356	DC	2	3	K906-3062	5	2-amino-5-bromo-N-(2,5-dimethylphenyl)pyridine-3-sulfonamide	93.46	Brc1cc([O+H][SH0]([O-])=Nc2c(C)ccc(C)c2)c(N)nc1	5	2.71	2.62	-5.49
omega_284942	-8.99728	-10.0961	0.558783	4.00472	4.55521	-5.07178	-2.94809	5	CL6481	DC	6	1	G205-0898	7	5-oxo-2-pyrrolidin-1-yl-N-(thien-2-ylmethyl)-5H-[1,3,4]thiadiazolo[3,2-a]pyrimidine-6-carboxamide	130.91	O=C(NCc1sccc1)C=1C(=O)N2N=C(N3CCCC3)SC2=NC=1	110	2.71	1.95	-2.45
omega_1291804	-8.99721	-13.1789	0.375331	4.89742	3.45127	-2.02886	-2.51351	5	CL8342	NC	4	2	F731-0248	6	4-ethoxy-N-(8-methyl-11-oxo-10,11-dihydrodibenzo[b,f][1,4]oxazepin-2-yl)benzamide	76.66	O=C(Nc1cc2C(=O)Nc3c(Oc2cc1)ccc(C)c3)c1ccc(OCC)cc1	115	3.9	4.12	-4.17
omega_656218	-8.99712	-10.4599	0.48109	3.33248	4.30108	-3.2503	-3.40155	9	CL0223	DC	5	3	C202-4093	6	N-[(2Z)-3-carboxyprop-2-enoyl]phenylalanine	103.7	O=C(O)/C=C\C(=O)NC(C(=O)O)Cc1ccccc1	73	-4.33	0.87	1.93
omega_346472	-8.99709	-10.6734	0.578906	3.79875	3.22491	-4.37959	-1.54663	4	CL2717	DC	4	1	G822-0048	4	N-(4-fluorobenzyl)-7-methylfuro[2,3-b]quinoline-2-carboxamide	55.13	Fc1ccc(CNC(=O)c2oc3nc4c(cc3c2)ccc(C)c4)cc1	184	3.72	4.15	-4.05
omega_480473	-8.99618	-10.8287	0.444584	3.73474	3.81839	-4.1894	-1.9758	2		DC	4	2	4896-2008	5	6-Chloro-7-methyl-3-(pyridin-2-yl-hydrazono)-1,3-dihydro-indol-2-one	66.38	Clc1c(C)c2NC(=O)C(=NNc3ncccc3)c2cc1	41	3.66	2.63	-1.54
omega_14923	-8.99581	-11.851	0.497713	4.62267	6.06123	-5.09344	-3.23303	4	CL0015	DC	8	1	C679-2567	7	7-{[(4-methyl-6-oxo-1,6-dihydropyrimidin-2-yl)thio]methyl}-2-(methylthio)-5H-[1,3,4]thiadiazolo[3,2-a]pyrimidin-5-one	162.39	S(CC=1N=C2SC(SC)=NN2C(=O)C=1)C1=NC(C)=CC(=O)N1	9	-0.57	2.44	-3.07
omega_1234001	-8.99475	-9.3755	0.486998	3.16788	3.88079	-4.69517	-2.45975	5	CL2813A	NC	4	1	D358-0006	5	N-butyl-5-oxo-5H-[1,3]thiazolo[3,2-a]pyrimidine-6-carboxamide	87.07	O=C(NCCCC)C=1C(=O)N2C(SC=C2)=NC=1	154	1.55	0.38	-3.78
omega_277543	-8.99352	-11.6039	0.615847	5.28621	2.76408	-3.81183	-2.24391	5	CL5886	DC	5	0	G020-0092	5	6-(4-chlorobenzyl)-2-ethyl-5-(ethylthio)-2,6-dihydro-7H-pyrazolo[4,3-d]pyrimidin-7-one	75.79	Clc1ccc(CN2C(SCC)=Nc3c(C2=O)nn(CC)c3)cc1	6	3.41	3.71	-4.84
omega_58700	-8.99267	-13.4899	0.645043	6.287	3.47125	-2.31639	-3.58965	7	CL5285A	DC	5	2	D144-0928	5	N-[2-(2-fluorophenyl)ethyl]-2-(5-hydroxy-4,7-dimethyl-2-oxo-2H-chromen-3-yl)acetamide	75.63	Fc1c(CCNC(=O)CC=2C(=O)Oc3c(c(O)cc(C)c3)C=2C)cccc1	229	3.49	3.88	-4.23
omega_532301	-8.99157	-11.0257	0.434218	5.85642	2.39924	-4.66967	-1.98604	5	CL1308	DC	4	0	8002-0516	3	N-{(1E)-[5-(pyridin-2-ylthio)-2-furyl]methylene}-1,1'-biphenyl-4-amine	38.39	S(c1oc(C=Nc2ccc(-c3ccccc3)cc2)cc1)c1ncccc1	39	5.65	6.53	-5.05
omega_284859	-8.99035	-11.6766	0.526748	5.06619	4.57974	-4.49139	-2.99507	4	CL6481	DC	6	1	G205-0626	8	N-(3,5-dimethylphenyl)-2-morpholin-4-yl-5-oxo-5H-[1,3,4]thiadiazolo[3,2-a]pyrimidine-6-carboxamide	111.9	O=C(Nc1cc(C)cc(C)c1)C=1C(=O)N2N=C(N3CCOCC3)SC2=NC=1	131	1.06	2.63	-2.75
omega_940160	-8.98962	-10.7394	0.404385	4.66681	2.75878	-2.96665	-3.1136	4		DC	5	3	8017-2713	5	2-[(1H-1,2,3-benzotriazol-4-ylamino)methyl]-4,6-dichlorophenol	73.83	Clc1c(O)c(CNc2c3nn[nH]c3ccc2)cc(Cl)c1	31	3.12	3.29	-3.85
omega_1431496	-8.9894	-11.1629	0.653619	4.12717	5.69771	-5.05029	-3.2547	6	CL9020	NC	3	3	L879-0013	6	N-(2,3-dihydro-1,4-benzodioxin-6-yl)-2-({6-methyl-2-[4-(trifluoromethyl)phenyl]pyrimidin-4-yl}oxy)acetamide	86.88	O=C(Nc1[nH]c2c(n1)cccc2)CNC(=O)c1c(C)cc(C)cc1	21	1.02	2.7	0.83
omega_113265	-8.9891	-11.7145	0.549507	5.06318	4.1349	-4.14633	-2.87587	4	CL7372	DC	5	2	D489-0138	6	5-{[(4-fluorophenyl)amino]methyl}-2-(2-thienyl)[1,2,4]triazolo[1,5-a]pyrimidin-7(4H)-one	100.08	O=C1n2nc(-c3sccc3)nc2NC(CNc2cc(C)ccc2)=C1	146	1.41	2.28	-0.28
omega_1361715	-8.9886	-12.1276	0.280995	3.88625	3.03717	-1.92009	-2.14535	7	CL3141	NC	4	2	K844-0799	5	(4-Hydroxy-2-oxo-1,2-dihydro-quinolin-3-yl)-acetic acid butyl ester	75.63	O=C(OCCCC)CC=1C(=O)Nc2c(C=1O)cccc2	51	1.77	1.87	-1.59
omega_1431605	-8.98807	-12.2227	0.799549	4.77944	5.69794	-4.64445	-3.39785	8	CL9020	NC	3	3	L879-0213	6	1-(3-cyanoquinolin-4-yl)-N-(3-fluoro-4-methylphenyl)piperidine-4-carboxamide	86.88	O=C(Nc1[nH]c2c(n1)cccc2)C(NC(=O)c1c(C)cc(C)cc1)C(CC)C	38	2.25	4.49	-1.99
omega_591307	-8.98772	-9.94329	0.376726	3.78569	4.23599	-4.42576	-3.01706	5		DC	5	2	8014-1730	5	N-phenethyl-2-(4H-1,2,4-triazol-3-yl)acetamide	70.67	O=C(NCCc1ccccc1)Cc1[nH]cnn1	32	0.26	0.27	-1.92
omega_539344	-8.98507	-10.6913	0.53609	4.62946	2.9605	-3.42018	-2.99964	6		DC	4	2	8003-9023	5	3-hydroxy-N'~2~-[(E)-1-(3-methoxy-4-methylphenyl)methylidene]-2-naphthohydrazide	70.92	O=C(NN=Cc1cc(OC)c(C)cc1)c1c(O)cc2c(c1)cccc2	9	3.33	3.79	-3.5
omega_144238	-8.98497	-11.1572	0.703869	4.55865	3.37183	-4.57482	-1.88727	4	CL4665	DC	4	1	E213-0908	5	N-benzyl-3-methyl-4-oxo-6,7,8,9-tetrahydro-4H-pyrido[1,2-a]thieno[2,3-d]pyrimidine-2-carboxamide	90.01	O=C(NCc1ccccc1)c1c(C)c2C(=O)N3C(=Nc2s1)CCCC3	188	1.33	3.29	-1.27
omega_155356	-8.98481	-13.359	0.551127	5.38312	3.58971	-3.10176	-2.04801	3	CL4837	DC	6	1	E559-0208	6	N-(2-bromo-4-methylphenyl)-7-methyl-5-oxo-5H-[1,3]thiazolo[3,2-a]pyrimidine-6-sulfonamide	112.52	Brc1c(N=[SH0]([O+H]C=2C(=O)N3C(SC=C3)=NC=2C)[O-])ccc(C)c1	42	2.22	1.82	-3.24
omega_463443	-8.98284	-11.734	0.389038	3.99426	3.77928	-2.37621	-3.03523	6	CL0768	DC	7	2	4356-0613	7	5-Hydroxy-2-methyl-6-sulfo-benzofuran-3-carboxylic acid ethyl ester	114.04	[SH0](=O)(OO)c1c(O)cc2c(C(=O)OCC)c(C)oc2c1	115	1.84	1.38	-1.71
omega_728514	-8.98244	-12.2273	0.703338	4.44003	3.28704	-3.10036	-2.08516	2	CL3999	DC	5	2	J052-1829	6	3-(4-fluorophenyl)-N-(2-hydroxy-6-methylphenyl)[1,2,4]triazolo[4,3-a]pyridine-8-carboxamide	79.52	Fc1ccc(-c2n3c(C(C(=O)Nc4c(O)cccc4C)=CC=C3)nn2)cc1	73	3.02	3.72	-3.45
omega_534835	-8.98226	-12.2494	0.267895	4.59453	2.06184	-1.88071	-1.77645	5		DC	5	2	8003-0488	7	3-hydroxy-N'~2~-[(E)-1-(3-nitrophenyl)methylidene]-2-naphthohydrazide	107.51	O=[N+]([O-])c1cc(C=NNC(=O)c2c(O)cc3c(c2)cccc3)ccc1	41	3.65	3.22	-3.46
omega_1322981	-8.98035	-12.7077	0.667772	4.6556	3.07003	-4.09737	-0.568652	4	CL6074	NC	6	0	G607-0954	6	6-fluoro-1-propyl-3-(3-pyridin-2-yl-1,2,4-oxadiazol-5-yl)quinolin-4(1H)-one	72.12	Fc1cc2C(=O)C(c3onc(-c4ncccc4)n3)=CN(CCC)c2cc1	136	1.84	3.198	-5.69
omega_553146	-8.97984	-11.9128	0.317008	4.55675	2.1498	-1.74927	-2.34129	5		DC	4	2	8006-7284	4	N'~2~-[(E)-1-(4-bromophenyl)methylidene]-3-hydroxy-2-naphthohydrazide	61.69	Brc1ccc(C=NNC(=O)c2c(O)cc3c(c2)cccc3)cc1	30	2.98	4.07	-4.28
omega_540340	-8.97983	-12.1594	0.334002	4.89946	2.16034	-1.89051	-2.32376	7		DC	5	2	8004-0797	4	N'~1~-[(E,2E)-3-phenyl-2-propenylidene]-2-(2,4,6-tribromoanilino)acetohydrazide	53.49	Brc1c(NCC(=O)NN=CC=Cc2ccccc2)c(Br)cc(Br)c1	30	4.66	4.56	-4.2
omega_124921	-8.9797	-11.7454	0.757389	5.76546	5.19209	-5.65823	-3.29099	5	CL1351	DC	2	3	D675-0147	7	N~5~-(pyridin-2-ylmethyl)-N~4~-[4-(trifluoromethyl)benzyl]-1H-imidazole-4,5-dicarboxamide	99.77	FC(F)(F)c1ccc(CNC(=O)c2c(C(=O)NCc3ncccc3)[nH]cn2)cc1	183	2.33	1.4	1.66
omega_732450	-8.97764	-11.5989	0.438058	5.29087	2.88289	-1.92293	-4.06763	5		DC	7	3	K007-0387	7	3-hydroxy-N'-[(E)-1-(4-hydroxy-6-methyl-2-oxo-2H-pyran-3-yl)ethylidene]-2-naphthohydrazide	108.22	O=C(N/N=C(\C)/C=1C(=O)OC(C)=CC=1O)c1c(O)cc2c(c1)cccc2	1	-0.97	2.13	-2.67
omega_1472520	-8.97697	-11.598	0.303326	4.45629	2.29537	-2.35993	-2.07404	4	CL9905	NC	6	1	M769-0790	6	N-(5-chloro-2-methylphenyl)-5-(phenylsulfonyl)thiophene-2-carboxamide	75.02	O=C(N(CCc1nc(-c2[nH]c3c(c2)cc(C)cc3)on1)C)C	4	2.43	2.43	-3.88
omega_113299	-8.97579	-12.5539	0.488154	5.49204	4.57679	-4.08217	-2.89671	4	CL7372	DC	2	4	D489-0178	6	2-(3,4-dimethylphenyl)-5-{[(4-fluorophenyl)amino]methyl}[1,2,4]triazolo[1,5-a]pyrimidin-7(4H)-one	71.84	Fc1ccc(NCC=2Nc3n(C(=O)C=2)nc(-c2cc(C)c(C)cc2)n3)cc1	161	1.01	3.47	-1.77
omega_124356	-8.97508	-9.30783	0.521305	4.42437	5.33327	-5.30539	-4.64082	4	CM0132	DC	6	3	D668-0060	7	N-(3-chloro-2-methylphenyl)-2-hydroxy-6-oxo-1,6-dihydropyrimidine-5-sulfonamide	116.24	Clc1c(C)c(NS(=O)(=O)C=2C(=O)NC(O)=NC=2)ccc1	175	0.54	0.644	-1.06
omega_14926	-8.97505	-13.469	0.468188	5.9528	3.45392	-2.3691	-3.01183	7		DC	8	1	C679-2577	6	2-({[2-(ethylthio)-5-oxo-5H-[1,3,4]thiadiazolo[3,2-a]pyrimidin-7-yl]methyl}thio)benzoic acid	158.23	S(CC=1N=C2SC(SCC)=NN2C(=O)C=1)c1c(C(=O)O)cccc1	88	-1.53	3.9	-1.93
omega_61553	-8.97479	-10.7351	0.453097	3.4158	3.74007	-2.24407	-3.60461	8	CL1721	DC	3	3	D186-0358	5	N-[2-(1H-benzimidazol-2-yl)ethyl]-4-hydroxypentanamide	78.01	O=C(NCCc1[nH]c2c(n1)cccc2)CCC(O)C	23	0.62	1.19	0.64
omega_330117	-8.97472	-13.3577	0.542754	5.58125	2.34943	-2.79954	-1.29087	4	CL3030	DC	4	1	G677-0009	4	N-(5-chloro-2-methylphenyl)-3-methyl-6-phenylimidazo[2,1-b][1,3]thiazole-2-carboxamide	74.64	Clc1cc(NC(=O)C2=C(C)n3c(S2)nc(-c2ccccc2)c3)c(C)cc1	16	6.01	4.3	-8.04
omega_947260	-8.97423	-8.69354	0.38879	3.74367	4.59544	-4.54883	-4.45976	4		DC	6	3	8020-2485	6	5-[(4-methoxyanilino)methyl]-1,2-dihydro-3H-1,2,4-triazol-3-one	74.75	O(C)c1ccc(NCC2=NC(=O)NN2)cc1	31	-0.18	-0.17	-1.76
omega_648847	-8.97332	-12.3983	0.539233	4.09018	3.65697	-2.59013	-2.27127	6	CL3584	DC	5	1	C200-2469	8	N-(2-ethoxyphenyl)-2-(1-methyl-4-oxo-1,4-dihydro-5H-pyrazolo[3,4-d]pyrimidin-5-yl)acetamide	88.82	O=C(Nc1c(OCC)cccc1)CN1C(=O)c2c(n(C)nc2)N=C1	34	-0.09	0.03	1.33
omega_335013	-8.97319	-10.5087	0.401068	3.5977	4.79846	-3.91061	-3.35115	4	CL7215	DC	4	2	G751-0517	5	2-{[(5-ethyl-4H-1,2,4-triazol-3-yl)thio]methyl}-6-methylquinolin-4(1H)-one	95.97	S(CC=1Nc2c(C(=O)C=1)cc(C)cc2)c1[nH]c(CC)nn1	57	2.48	2.5	-2.52
omega_1502785	-8.97223	-12.9647	0.639518	4.82856	4.74931	-3.96142	-2.26349	4	CM0878	NC	7	2	P633-0140	6	N-[2-(trifluoromethoxy)phenyl]-1H-pyrrolo[2,3-b]pyridine-3-sulfonamide	92.46	S(=O)(=O)(Nc1c(OC(F)(F)F)cccc1)c1c2c([nH]c1)nccc2	123	1.67	3.085	-4.59
omega_1272328	-8.97081	-13.2588	0.865139	6.50268	3.66786	-4.96145	-1.78621	3	CL5679A	NC	5	0	F270-0555	7	6-[2-(4-benzylpiperidin-1-yl)-2-oxoethyl]-3,4-dimethylisoxazolo[3,4-d]pyridazin-7(6H)-one	79.01	O=C(CN1C(=O)c2noc(C)c2C(C)=N1)N1CCC(Cc2ccccc2)CC1	22	1.88	1.99	-2.77
omega_365778	-8.97058	-10.2946	0.201526	3.77391	2.18349	-2.58399	-2.25089	1		DC	3	1	1326-0466	3	7-methyl-2-naphthalenesulfonic acid	62.75	S(=O)(=O)(O)c1cc2c(cc1)ccc(C)c2	171	-2.33	1.17	-1.51
omega_735089	-8.97042	-11.7821	0.466477	4.93617	3.49448	-2.12162	-3.96379	8		DC	6	4	K087-0380	7	3-hydroxy-N'-{(1E)-[3-hydroxy-5-(hydroxymethyl)-2-methylpyridin-4-yl]methylene}-2-naphthohydrazide	115.04	O=C(NN=Cc1c(O)c(C)ncc1CO)c1c(O)cc2c(c1)cccc2	32	1.75	1.58	-1.29
omega_674617	-8.97038	-9.70833	0.396863	3.87262	4.98922	-3.53282	-4.98794	6	CL7174	DC	6	4	C301-7392	7	N-(2,4-dihydroxypyrimidin-5-yl)-N'-(3-fluorophenyl)urea	107.37	Fc1cc(NC(=O)Nc2c(O)nc(O)nc2)ccc1	1	0.18	1.48	0.82
omega_1500246	-8.96943	-12.1524	0.592386	4.68315	3.74183	-3.14891	-2.68547	6	CM0615	NC	3	3	P574-2295	6	2-(2-amino-4-ethyl-5-methyl-6-oxopyrimidin-1(6H)-yl)-N-(2-ethylphenyl)acetamide	87.79	O=C(Nc1c(CC)cccc1)CN1C(=O)C(C)=C(CC)N=C1N	170	2.931	2.836	-0.11
omega_602855	-8.96942	-12.05	0.243265	4.89244	1.80533	-1.92384	-1.93661	4		DC	7	2	8016-0215	7	N'~2~-[(E)-1-(2,1,3-benzoxadiazol-5-yl)methylidene]-3-hydroxy-2-naphthohydrazide	100.61	O=C(N/N=C/c1cc2nonc2cc1)c1c(O)cc2c(c1)cccc2	31	3.92	3.97	-4.53
omega_1300000	-8.96939	-12.3278	0.380341	4.36706	4.19407	-4.15826	-1.42483	3	CL8429	NC	4	1	F937-0252	4	N-(2-chlorobenzyl)-2,4-dimethylpyrimidine-5-carboxamide	54.88	Clc1c(CNC(=O)c2c(C)nc(C)nc2)cccc1	1	2.45	1.75	-1.79
omega_549565	-8.96906	-9.96833	0.520062	4.21737	3.89841	-3.00728	-4.6293	7		DC	5	3	8005-9342	5	2-{[(phenethylhydroxyphosphoryl)methyl]amino}acetic acid	96.44	P(=O)(O)(CNCC(=O)O)CCc1ccccc1	29	-1.69	1.83	-2.21
omega_320619	-8.96851	-10.5663	0.752612	4.28252	3.67357	-4.21773	-2.89319	5	CL2813	DC	4	1	G595-0154	5	4-oxo-N-(2-phenylpropyl)-6,7,8,9-tetrahydro-4H-pyrimido[2,1-b][1,3]benzothiazole-3-carboxamide	87.07	O=C(NCC(C)c1ccccc1)C=1C(=O)N2C(SC3=C2CCCC3)=NC=1	75	3.45	2.98	-3.22
omega_548057	-8.96776	-11.7493	0.226379	4.26378	2.70025	-2.05534	-2.35353	7		DC	6	2	8005-6549	5	N'~1~-[(E)-1-(2-hydroxy-3,5-diiodophenyl)methylidene]-2-(3-methylphenoxy)acetohydrazide	70.92	Ic1c(O)c(C=NNC(=O)COc2cc(C)ccc2)cc(I)c1	43	4.97	3.89	-4.59
omega_1212208	-8.96748	-10.67	0.545896	4.09848	3.10921	-3.75781	-2.29322	3		NC	4	1	8539-0734	5	(2-hydroxyphenyl)[2-(4-methylphenyl)pyrazolo[1,5-a]pyrimidin-6-yl]methanone	67.49	O=C(c1c(O)cccc1)C1=Cn2nc(-c3ccc(C)cc3)cc2N=C1	37	4.25	4.06	-4.03
omega_418353	-8.96735	-8.8229	0.282317	4.18536	4.15303	-4.23274	-4.53242	6		DC	4	4	3254-0751	7	N'-[(1E)-1-(4-hydroxyphenyl)ethylidene]-2-(5-methyl-3-oxo-2,3-dihydro-1H-pyrazol-4-yl)acetohydrazide	102.82	O=C(NN=C(C)c1ccc(O)cc1)CC=1C(=O)NNC=1C	50	0.13	0.19	-1.14
omega_568216	-8.96705	-11.3367	0.201669	4.05929	2.04411	-0.972762	-2.96266	5		DC	4	3	8009-7137	4	3-hydroxy-N~2~-(2-hydroxyethyl)-2-naphthamide	69.56	O=C(NCCO)c1c(O)cc2c(c1)cccc2	30	1.7	1.74	-1.96
omega_546572	-8.96704	-11.1283	0.374571	4.36108	4.03108	-2.65987	-3.94557	5		DC	6	3	8005-4192	6	2-{[(2-anilino-2-oxoethyl)amino]carbonyl}benzoic acid	95.5	O=C(Nc1ccccc1)CNC(=O)c1c(C(=O)O)cccc1	30	-1.79	1.3	-2.67
omega_872288	-8.96691	-10.848	0.428166	3.91215	4.02708	-3.82887	-2.6574	4		DC	5	2	Y020-9480	5	6-(4-fluorophenyl)-N-(2-furylmethyl)-2-hydroxynicotinamide	75.36	Fc1ccc(-c2nc(O)c(C(=O)NCc3occc3)cc2)cc1	4	3.54	3.72	-3.66
omega_418357	-8.96636	-8.27037	0.376901	4.12217	5.31147	-5.21045	-5.29607	5		DC	4	3	3254-0757	7	2-(5-methyl-3-oxo-2,3-dihydro-1H-pyrazol-4-yl)-N'-[(1E)-1-pyridin-3-ylethylidene]acetohydrazide	95.48	O=C(NN=C(C)c1cnccc1)CC=1C(=O)NNC=1C	1	-1.5	-0.69	0.52
omega_369164	-8.96603	-11.1988	0.35463	3.71428	3.24037	-2.91806	-2.15842	6		DC	5	2	1548-0573	5	2-chloro-N-(2-oxo-2-{2-[(E,2E)-3-phenyl-2-propenylidene]hydrazino}ethyl)benzamide	70.56	Clc1c(C(=O)NCC(=O)N/N=C/C=C/c2ccccc2)cccc1	1	2.83	2.83	-5.1
omega_1500251	-8.96579	-12.1993	0.544016	4.11038	4.2941	-3.19024	-2.52476	5	CM0615	NC	7	3	P574-2304	7	2-(2-amino-4-ethyl-5-methyl-6-oxopyrimidin-1(6H)-yl)-N-(3-methoxyphenyl)acetamide	97.02	O=C(Nc1cc(OC)ccc1)CN1C(=O)C(C)=C(CC)N=C1N	7	1.63	1.63	-3.28
omega_124353	-8.96566	-8.36986	0.451688	2.98592	5.00261	-4.91737	-4.11865	4	CM0132	DC	6	3	D668-0055	7	N-(4-chlorophenyl)-2-hydroxy-6-oxo-1,6-dihydropyrimidine-5-sulfonamide	116.24	Clc1ccc(NS(=O)(=O)C=2C(=O)NC(O)=NC=2)cc1	192	0.42	0.158	0.22
omega_1361721	-8.96552	-11.8228	0.641662	4.13105	4.11244	-2.37863	-3.64923	5	CL1605	NC	3	3	K844-0807	5	4-Hydroxy-2-oxo-1,2-dihydro-quinoline-3-carboxylic acid (1-phenyl-ethyl)-amide	78.43	O=C(NC(C)c1ccccc1)C=1C(=O)Nc2c(C=1O)cccc2	76	1.77	1.82	-2.35
omega_1389551	-8.96488	-12.7443	0.779726	4.87234	4.03094	-3.57477	-2.32878	6	CL4819	NC	6	1	L388-0022	8	N-(3-chloro-4-methylphenyl)-2-[1-(3,4-dimethylbenzyl)-1H-pyrrol-2-yl]-2-oxoacetamide	101.21	O=C(Nc1c(C(=O)OC)cccc1)CN1C(=O)c2oc3c(c2N=C1)cccc3	184	1.62	1.37	-2.21
omega_949768	-8.96457	-8.68922	0.403242	3.82588	4.55119	-5.59671	-3.45895	3		DC	7	1	8020-8263	7	4-(4-methoxyphenyl)-5-nitro-2H-1,2,3-triazole	96.62	O=[N+]([O-])c1c(-c2ccc(OC)cc2)n[nH]n1	31	-0.56	1.29	-2.7
omega_799327	-8.96392	-11.2832	0.493151	3.76935	3.61328	-3.69921	-1.85729	2		DC	6	1	8016-8932	6	N~2~-(2,4-dichlorophenyl)[1,2,4]triazolo[1,5-a]pyrimidine-2-carboxamide	72.18	Clc1c(NC(=O)c2nn3c(n2)N=CC=C3)ccc(Cl)c1	31	2.79	2.88	-4.6
omega_32889	-8.9633	-13.8564	0.393464	5.89007	2.52407	-1.49153	-2.42294	5		DC	5	1	C800-0068	6	2-[5-(3-chlorobenzyl)-4-oxo-4,5-dihydro-3H-pyridazino[4,5-b]indol-3-yl]acetic acid	74.9	Clc1cc(Cn2c3c(c4c2C(=O)N(CC(=O)O)N=C4)cccc3)ccc1	62	0.33	3.55	-1.4
omega_124340	-8.96267	-8.52149	0.439791	3.63314	5.27257	-5.38191	-4.40478	4	CM0132	DC	5	3	D668-0040	7	N-(2,4-dimethylphenyl)-2-hydroxy-6-oxo-1,6-dihydropyrimidine-5-sulfonamide	116.24	S(=O)(=O)(Nc1c(C)cc(C)cc1)C=1C(=O)NC(O)=NC=1	190	0.03	0.466	0.95
omega_113273	-8.96225	-12.0905	0.625813	5.33209	4.20431	-4.16726	-2.86671	4	CL7372	DC	4	2	D489-0146	6	5-{[(2,4-dimethylphenyl)amino]methyl}-2-(2-thienyl)[1,2,4]triazolo[1,5-a]pyrimidin-7(4H)-one	118.54	O(C)c1c(NCC=2Nc3n(C(=O)C=2)nc(-c2sccc2)n3)ccc(OC)c1	103	1.06	3.04	-0.95
omega_56584	-8.96206	-10.3433	0.845571	4.66562	4.42065	-4.56404	-3.98658	8	CL5254	DC	7	3	D133-0030	7	ethyl 4-amino-2-{[2-(2-chloroanilino)-2-oxoethyl]sulfanyl}-5-pyrimidinecarboxylate	132.5	Clc1c(NC(=O)CSc2nc(N)c(C(=O)OCC)cn2)cccc1	244	3.1	2.41	-1.81
omega_627522	-8.96178	-12.1837	0.407303	4.90526	3.73637	-3.71373	-2.11327	3		DC	4	1	8563-0672	5	6-benzyl-2-(ethylthio)-5-methyl[1,2,4]triazolo[1,5-a]pyrimidin-7(4H)-one	85.11	S(CC)c1nn2C(=O)C(Cc3ccccc3)=C(C)Nc2n1	93	0.71	3.35	-2.6
omega_362008	-8.96112	-12.0005	0.282555	5.27541	3.24144	-2.0668	-3.69325	6		DC	7	3	1038-3676	8	N'-[(1E)-(5-chloro-2-hydroxy-3-nitrophenyl)methylene]-3-hydroxy-2-naphthohydrazide	127.74	Clc1cc([N+](=O)[O-])c(O)c(C=NNC(=O)c2c(O)cc3c(c2)cccc3)c1	2	1.29	3.62	-2.38
omega_284877	-8.96094	-8.35731	0.453546	3.08252	4.63485	-5.65754	-3.11701	4	CL6481	DC	6	1	G205-0670	8	N-ethyl-2-morpholin-4-yl-5-oxo-5H-[1,3,4]thiadiazolo[3,2-a]pyrimidine-6-carboxamide	111.9	O=C(NCC)C=1C(=O)N2N=C(N3CCOCC3)SC2=NC=1	96	0.09	0.43	-2.47
omega_376281	-8.96086	-12.247	0.383673	5.12109	2.77812	-1.91171	-3.08506	7		DC	6	3	1761-1417	5	N'-[(E)-1-(5-chloro-2-hydroxyphenyl)methylidene]-2-(2,6-dibromo-4-methylanilino)acetohydrazide	73.72	Brc1c(NCC(=O)NN=Cc2c(O)ccc(Cl)c2)c(Br)cc(C)c1	436	4.5	4.45	-3.82
omega_1291807	-8.96005	-13.7516	0.418981	5.66907	3.62204	-2.17635	-2.74221	3	CL8342	NC	3	2	F731-0253	5	2-bromo-N-(8-methyl-11-oxo-10,11-dihydrodibenzo[b,f][1,4]oxazepin-2-yl)benzamide	67.43	Brc1c(C(=O)Nc2cc3C(=O)Nc4c(Oc3cc2)ccc(C)c4)cccc1	117	3.82	4.62	-4.05
omega_243169	-8.95994	-13.7629	0.49317	5.81189	4.9518	-4.32863	-2.1253	8	CL8043	DC	4	2	F550-1985	7	1-[3-(cycloheptylamino)-3-oxopropyl]-6-oxo-N-phenyl-1,6-dihydropyridazine-3-carboxamide	90.87	O=C(NC1CCCCCC1)CCN1C(=O)C=CC(C(=O)Nc2ccccc2)=N1	129	1.36	2.18	-1.69
omega_686561	-8.95991	-13.339	0.287963	4.52019	3.71135	-2.26339	-1.87701	2	CL1345	DC	5	2	C390-0675	7	methyl 4-[3-(2-furyl)-6-oxo-1,4,5,6-tetrahydropyrrolo[3,4-c]pyrazol-4-yl]benzoate	97.22	O=C(OC)c1ccc(C2NC(=O)c3[nH]nc(-c4occc4)c23)cc1	1	3.57	1.78	-2.02
omega_953568	-8.95976	-12.5569	0.486218	5.60322	2.99908	-2.69002	-2.80133	5		DC	5	2	Y042-9844	5	2-(6-fluoro-1H-indol-1-yl)-N~1~-[2-(1H-imidazol-4-yl)ethyl]acetamide	62.71	Fc1cc2n(CC(=O)NCCc3nc[nH]c3)ccc2cc1	30	1.82	2.11	-3.36
omega_320589	-8.95961	-11.5276	0.842895	4.92842	3.80534	-4.52766	-2.481	4	CL2813	DC	5	1	G595-0079	5	N-(4-chlorobenzyl)-4-oxo-6,7,8,9-tetrahydro-4H-pyrimido[2,1-b][1,3]benzothiazole-3-carboxamide	87.07	Clc1ccc(CNC(=O)C=2C(=O)N3C(SC4=C3CCCC4)=NC=2)cc1	131	4.32	3	-5.78
omega_560075	-8.95951	-11.5224	0.431315	4.52352	3.46857	-2.39447	-3.466	7		DC	4	3	8008-3435	6	N~1~-(3,5-dimethylphenyl)-2-{2-[(E)-1-(2-hydroxyphenyl)methylidene]hydrazino}-2-oxoacetamide	90.79	O=C(NN=Cc1c(O)cccc1)C(=O)Nc1cc(C)cc(C)c1	12	2.57	2.65	-1.98
omega_907376	-8.95947	-12.4397	0.410701	5.45063	3.15965	-1.75341	-3.78731	6		DC	7	3	Y041-1845	7	N-[(7-hydroxy-4,8-dimethyl-2-oxo-2H-chromen-3-yl)acetyl]-beta-alanine	112.93	O=C(O)CCNC(=O)CC=1C(=O)Oc2c(C)c(O)ccc2C=1C	83	0.39538	1.41	-0.95143
omega_525420	-8.95937	-13.7066	0.412144	6.12106	3.29133	-2.45004	-2.62727	5	CL2610	DC	4	2	7407-0264	6	3-[2-(3,5-dimethyl-1H-pyrazol-4-yl)-2-oxoethyl]-1-ethyl-3-hydroxy-1,3-dihydro-2H-indol-2-one	86.29	O=C(CC1(O)C(=O)N(CC)c2c1cccc2)c1c(C)[nH]nc1C	3	1.23	1.06	-1.42
omega_284959	-8.95843	-11.5159	0.767439	4.65464	4.17083	-4.6814	-2.354	6	CL6481	DC	5	1	G205-1005	7	N-(4-ethylbenzyl)-5-oxo-2-pyrrolidin-1-yl-5H-[1,3,4]thiadiazolo[3,2-a]pyrimidine-6-carboxamide	102.67	O=C(NCc1ccc(CC)cc1)C=1C(=O)N2N=C(N3CCCC3)SC2=NC=1	45	2.63	3.38	-4.21
omega_22512	-8.9583	-11.7098	0.64632	4.80174	3.52758	-3.83575	-2.38837	3	CL3531	DC	4	1	C720-0242	5	N-(3-chloro-2-methylphenyl)-8-methyl-4-oxo-4H-pyrido[1,2-a]pyrimidine-3-carboxamide	61.77	Clc1c(C)c(NC(=O)C=2C(=O)N3C(=NC=2)C=C(C)C=C3)ccc1	117	3.34	2	-3.23
omega_107073	-8.95825	-12.739	0.505792	5.148	4.78902	-4.59743	-2.06466	3	CL6729A	DC	5	1	D458-0674	6	N-(3-chlorophenyl)-2-(2-ethyl-5,7-dimethyl[1,2,4]triazolo[1,5-a]pyrimidin-6-yl)acetamide	72.18	Clc1cc(NC(=O)CC2=C(C)n3nc(CC)nc3N=C2C)ccc1	84	3.48	2.91	-6.26
omega_344585	-8.95729	-12.2875	0.266217	4.9807	3.57082	-3.14362	-2.34387	0	CL7467	DC	6	1	G803-0522	5	N-(2,4-difluorophenyl)-3-methylisoxazolo[5,4-d]pyrimidin-4-amine	63.84	Fc1c(Nc2ncnc3onc(C)c23)ccc(F)c1	235	0.39	2.55	-2.93
omega_394796	-8.9569	-11.2188	0.29093	3.92842	3.27142	-2.08887	-3.14002	6		DC	5	3	2322-1692	6	N'-[(1E)-(5-bromo-2-hydroxyphenyl)methylene]-3-phenyl-1H-pyrazole-5-carbohydrazide	90.37	Brc1cc(C=NNC(=O)c2[nH]nc(-c3ccccc3)c2)c(O)cc1	392	3.28	3.85	-1.76
omega_376480	-8.95676	-12.3118	0.570325	5.1431	3.29573	-4.08649	-1.56765	3		DC	7	1	1762-0021	5	3,6-dibromo-N-(2,4-dichlorophenyl)pyrazolo[1,5-a]pyrimidine-2-carboxamide	59.28	Brc1c(C(=O)Nc2c(Cl)cc(Cl)cc2)nn2c1N=CC(Br)=C2	71	3.56	4.4	-4.53
omega_544831	-8.95639	-11.9066	0.205568	4.35786	2.69407	-1.97636	-2.33094	7		DC	7	2	8005-0575	5	2-(3-chlorophenoxy)-N'~1~-[(E)-1-(2-hydroxy-3,5-diiodophenyl)methylidene]acetohydrazide	70.92	Ic1c(O)c(C=NNC(=O)COc2cc(Cl)ccc2)cc(I)c1	40	6.08	4.07	-3.19
omega_87032	-8.95597	-12.998	0.553116	6.04472	4.18674	-3.96994	-2.77263	2	CL7372	DC	3	2	D351-0039	6	5-{[(2,4-dimethylphenyl)amino]methyl}-2-phenyl[1,2,4]triazolo[1,5-a]pyrimidin-7(4H)-one	71.84	O=C1n2nc(-c3ccccc3)nc2NC(CNc2c(C)cc(C)cc2)=C1	160	2.12	3.32	-2.88
omega_1502763	-8.95572	-11.2603	0.503303	5.011	3.91272	-4.18274	-2.93966	3	CM0878	NC	3	2	P633-0039	5	N-(3-methylphenyl)-1H-pyrrolo[2,3-b]pyridine-3-sulfonamide	83.23	S(=O)(=O)(Nc1cc(C)ccc1)c1c2c([nH]c1)nccc2	103	2.412	1.451	-4.49
omega_87150	-8.95545	-12.8027	0.51619	5.72987	4.15577	-3.88713	-2.66741	5	CL7372	DC	3	2	D351-0321	6	2-(4-tert-butylphenyl)-5-{[(2,3-dimethylphenyl)amino]methyl}[1,2,4]triazolo[1,5-a]pyrimidin-7(4H)-one	71.84	O=C1n2nc(-c3ccc(C(C)(C)C)cc3)nc2NC(CNc2c(C)c(C)ccc2)=C1	193	2.63	4.72	-4.6
omega_398594	-8.95485	-9.74085	0.693029	5.55405	4.06801	-5.85648	-3.67262	7		DC	5	1	2423-5121	6	2-[(1-ethyl-1H-1,3-benzimidazol-2-yl)sulfanyl]-N'~1~-[(E)-1-(2-pyridyl)methylidene]acetohydrazide	97.47	S(CC(=O)N/N=C/c1ncccc1)c1n(CC)c2c(n1)cccc2	2	1.42	3.53	-2.92
omega_1510960	-8.95474	-12.7379	0.472734	6.01334	3.34424	-3.44051	-2.60663	5	CM1204D	NC	3	2	P867-0010	5	2-{[4-(3-phenyl-1H-pyrazol-5-yl)piperazino]methyl}phenol	55.39	Oc1c(CN2CCN(c3[nH]nc(-c4ccccc4)c3)CC2)cccc1	110	3.912	3.781	-3.86
omega_910565	-8.95441	-12.2507	0.649144	5.85352	3.40866	-3.59145	-3.0236	5		DC	5	2	Y041-6070	5	N-[2-(5-methoxy-1H-indol-1-yl)ethyl]-1H-indole-6-carboxamide	59.05	O=C(NCCn1c2c(cc(OC)cc2)cc1)c1cc2[nH]ccc2cc1	55	4.13	4.13	-4.2
omega_416457	-8.95407	-11.3498	0.293686	4.10849	3.85345	-3.43523	-2.42468	5		DC	3	3	3253-1693	6	N'-[(1E)-1H-indol-3-ylmethylene]-3-phenyl-1H-pyrazole-5-carbohydrazide	85.93	O=C(NN=Cc1c2c([nH]c1)cccc2)c1[nH]nc(-c2ccccc2)c1	25	-1.32	3.1	-2.46
omega_915811	-8.95249	-14.7818	0.817823	6.65287	4.11039	-2.37236	-3.3794	9		DC	8	1	Y042-5339	8	N-[2-(4-methoxy-1H-indol-1-yl)ethyl]-2-(3-methoxypropyl)-1,3-dioxo-5-isoindolinecarboxamide	89.87	O=C(NCCn1c2c(c(OC)ccc2)cc1)c1cc2C(=O)N(CCCOC)C(=O)c2cc1	30	3.28	3.28	-4.64
omega_396027	-8.94963	-8.55587	0.506841	2.66076	4.13771	-3.47266	-4.22642	7		DC	6	4	2357-3755	7	N'-[(1E)-(5-bromo-2-hydroxyphenyl)methylene]-2-(5-hydroxy-1H-pyrazol-3-yl)acetohydrazide	110.6	Brc1cc(C=NNC(=O)Cc2n[nH]c(O)c2)c(O)cc1	1	-0.57	1.93	0.44
omega_113233	-8.94942	-12.3999	0.541541	5.6057	4.1815	-3.98211	-2.8962	5	CL7372	DC	4	2	D489-0094	6	5-{[(4-ethylphenyl)amino]methyl}-2-(4-fluorophenyl)[1,2,4]triazolo[1,5-a]pyrimidin-7(4H)-one	71.84	Fc1ccc(-c2nn3C(=O)C=C(CNc4cc(C)ccc4)Nc3n2)cc1	186	1.69	3.49	-1.34
omega_244031	-8.9488	-12.157	0.500373	4.81302	4.12258	-4.11213	-2.11561	5	CL7869	DC	6	1	F564-0259	6	N-(2-chlorobenzyl)-2-[(5,6-dimethylfuro[2,3-d]pyrimidin-4-yl)oxy]acetamide	77.25	Clc1c(CNC(=O)COc2ncnc3oc(C)c(C)c23)cccc1	123	2.74	2.88	-4.39
omega_356238	-8.94853	-11.3587	0.783541	4.46105	2.98504	-2.42178	-3.39766	4	CL1605	DC	3	4	0620-0333	5	4-hydroxy-1-methyl-2-oxo-N-(1-phenylethyl)-1,2-dihydro-3-quinolinecarboxamide	69.64	O=C(NC(C)c1ccccc1)C=1C(=O)N(C)c2c(C=1O)cccc2	19	2	3.11	-2.73
omega_906537	-8.94837	-13.7393	0.498324	6.47262	3.72286	-3.54603	-2.35687	6		DC	6	1	Y041-0833	6	4-[4-(4-fluorophenyl)-1-piperazinyl]-4-oxo-N-(2-pyridinylmethyl)butanamide	65.54	Fc1ccc(N2CCN(C(=O)CCC(=O)NCc3ncccc3)CC2)cc1	1	-3.6002	0.47	0.71004
omega_271755	-8.94617	-12.8856	0.353775	4.74953	4.19756	-3.98859	-1.37287	4	CL8429	DC	4	1	F937-0218	4	2-ethyl-4-methyl-N-(2-methylbenzyl)-5-pyrimidinecarboxamide	54.88	O=C(NCc1c(C)cccc1)c1c(C)nc(CC)nc1	2	2.03	2.03	-2.69
omega_343394	-8.94603	-12.0711	0.231762	4.49222	3.45756	-2.91562	-2.14088	3	CL2892	DC	4	3	G801-0015	6	N-(3-fluoro-4-methylphenyl)-2-oxo-2,3-dihydro-1H-benzimidazole-5-sulfonamide	95.68	[SH0]([O+H]c1cc2NC(=O)Nc2cc1)([O-])=Nc1cc(F)c(C)cc1	92	1.03	1.87	-3.98
omega_425392	-8.94594	-9.75491	0.38196	4.19883	3.75102	-3.70145	-3.82139	6		DC	5	4	3333-5037	6	4-(4-phenoxy-1H-pyrazol-3-yl)benzene-1,2,3-triol	98.6	O(c1c(-c2c(O)c(O)c(O)cc2)n[nH]c1)c1ccccc1	1	2.36	2.42	-1.13
omega_284850	-8.94579	-11.4317	0.563603	4.60336	4.38075	-4.23083	-2.831	4	CL6481	DC	6	1	G205-0606	8	N-(2,5-dimethylphenyl)-2-morpholin-4-yl-5-oxo-5H-[1,3,4]thiadiazolo[3,2-a]pyrimidine-6-carboxamide	111.9	O=C(Nc1c(C)ccc(C)c1)C=1C(=O)N2N=C(N3CCOCC3)SC2=NC=1	39	1.41	2.63	-2.76
omega_646766	-8.94578	-12.9268	0.704257	6.00797	4.59695	-3.73916	-3.589	9	CL1755	DC	4	2	C190-0023	6	N-[2-(4-chlorophenyl)ethyl]-2,4-dioxo-3-pentyl-1,2,3,4-tetrahydroquinazoline-7-carboxamide	78.51	Clc1ccc(CCNC(=O)c2cc3NC(=O)N(CCCCC)C(=O)c3cc2)cc1	68	5.24	4.86	-2.49
omega_153095	-8.94548	-13.0306	0.373617	4.85979	3.87716	-3.51774	-1.50774	2	CL5166	DC	5	1	E540-0159	4	N-(3-chloro-2-methylphenyl)-4-methyl-2-(methylthio)pyrimidine-5-carboxamide	80.18	Clc1c(C)c(NC(=O)c2c(C)nc(SC)nc2)ccc1	96	3.5	3.33	-2.6
omega_320680	-8.94539	-12.1017	0.733661	5.45008	3.78528	-3.88061	-2.93216	2	CL2813	DC	5	1	G595-0490	5	4-oxo-N-(1,2,3,4-tetrahydro-1-naphthalenyl)-7,8-dihydro-4H,6H-cyclopenta[4,5][1,3]thiazolo[3,2-a]pyrimidine-3-carboxamide	87.07	O=C(NC1c2c(cccc2)CCC1)C=1C(=O)N2C(SC3=C2CCC3)=NC=1	4	2.04	2.04	-4.62
omega_543756	-8.94506	-9.64766	0.406974	3.87402	5.15846	-5.58729	-3.14957	1		DC	6	1	8004-7508	9	4-nitro-5-(3-nitrophenyl)-2H-1,2,3-triazole	133.21	O=[N+]([O-])c1c(-c2cc([N+](=O)[O-])ccc2)n[nH]n1	73	-1.19	1.9	-1.34
omega_870495	-8.94496	-12.0701	0.645742	4.59358	5.45545	-4.52734	-3.04227	1		DC	6	3	Y020-7128	6	6-(1-benzofuran-2-yl)-N-(3-(trifluoromethyl)phenyl)-1,3,5-triazine-2,4-diamine	89.86	FC(F)(F)c1cc(Nc2nc(N)nc(-c3oc4c(c3)cccc4)n2)ccc1	26	5.34	5.34	-6.71
omega_53305	-8.94399	-12.4318	0.365037	3.12419	3.91184	-3.12846	-0.784835	2	CL3239	DC	5	1	D101-0160	5	4-fluoro-N-{[3-(4-methylphenyl)-1,2,4-oxadiazol-5-yl]methyl}benzamide	68.02	Fc1ccc(C(=O)NCc2onc(-c3ccc(C)cc3)n2)cc1	177	2.41	2.9	-2.9
omega_284945	-8.94379	-10.3544	0.506441	3.84645	4.86154	-4.79218	-3.01168	6	CL6481	DC	7	1	G205-0917	9	N-(2-morpholin-4-ylethyl)-5-oxo-2-pyrrolidin-1-yl-5H-[1,3,4]thiadiazolo[3,2-a]pyrimidine-6-carboxamide	115.14	O=C(NCCN1CCOCC1)C=1C(=O)N2N=C(N3CCCC3)SC2=NC=1	112	-0.87	0.68	-1.28
omega_302226	-8.94374	-13.1673	0.578069	5.86272	3.59675	-3.67564	-2.13832	5	CL6985	DC	4	1	G374-0746	6	2-[2-(4-chlorophenyl)-4-oxo-6,7-dihydropyrazolo[1,5-a]pyrazin-5(4H)-yl]-N-cycloheptylacetamide	67.23	Clc1ccc(-c2nn3c(C(=O)N(CC(=O)NC4CCCCCC4)CC3)c2)cc1	44	4.4	3.99	-7.17
omega_144235	-8.94341	-11.4271	0.752228	4.76426	3.51082	-4.67491	-1.86871	4	CL4665	DC	4	1	E213-0905	5	3-methyl-4-oxo-N-(1-phenylethyl)-6,7,8,9-tetrahydro-4H-pyrido[1,2-a]thieno[2,3-d]pyrimidine-2-carboxamide	90.01	O=C(NC(C)c1ccccc1)c1c(C)c2C(=O)N3C(=Nc2s1)CCCC3	4	1.78	3.67	-2.95
omega_1291802	-8.94282	-13.2942	0.420037	4.97637	3.71541	-1.93837	-2.8221	3	CL8342	NC	3	2	F731-0246	5	3-chloro-N-(8-methyl-11-oxo-10,11-dihydrodibenzo[b,f][1,4]oxazepin-2-yl)benzamide	67.43	Clc1cc(C(=O)Nc2cc3C(=O)Nc4c(Oc3cc2)ccc(C)c4)ccc1	104	4.17	4.45	-5.64
omega_1004626	-8.94216	-7.92323	0.513293	4.27544	5.13159	-6.11717	-4.82208	2	CM4193	IC	8	2	S636-0174	8	7-{[5-(tert-butyl)-4,5,6,7-tetrahydro-1H-indazol-3-yl]carbonyl}-2,5,6,7,8,9-hexahydro-3H-[1,2,4]triazolo[4,3-d][1,4]diazepin-3-one	93.69	O=C(N1CCN2C(=O)NN=C2CC1)c1n[nH]c2c1CC(C(C)(C)C)CC2	10	1.8	1.89	-4.16
omega_124342	-8.94197	-11.7862	0.252317	4.40111	4.18107	-3.15877	-2.83151	4	CM0132	DC	5	3	D668-0044	7	N-(3,4-dimethylphenyl)-2-hydroxy-6-oxo-1,6-dihydropyrimidine-5-sulfonamide	116.24	S(=O)(=O)(Nc1cc(C)c(C)cc1)C=1C(=O)NC(O)=NC=1	203	0.51	0.466	-0.47
omega_252108	-8.94196	-12.3972	0.669642	4.95462	3.02655	-2.94943	-2.24619	3	CL7852	DC	4	1	F692-0264	5	N-(2,3-dimethylphenyl)-7,8-dimethyl-4-oxo-4H-[1,3]thiazino[3,2-a]benzimidazole-2-carboxamide	89.29	O=C(Nc1c(C)c(C)ccc1)C=1Sc2n(C(=O)C=1)c1c(n2)cc(C)c(C)c1	56	3.12	5.11	-3.73
omega_1525740	-8.94189	-15.352	0.441062	6.50417	2.43988	-2.3224	-0.652609	4	CM1573	NC	6	0	T743-0099	5	5-[1-(3,5-difluorobenzyl)-1H-pyrrol-2-yl]-3-(4-pyridyl)-1,2,4-oxadiazole	56.74	Fc1cc(F)cc(Cn2c(-c3onc(-c4ccncc4)n3)ccc2)c1	85	1.775	3.025	-4.31
omega_398537	-8.94166	-13.0069	0.613941	6.26346	3.64044	-4.21948	-2.23313	8		DC	5	1	2423-4866	6	2-[(1-benzyl-1H-1,3-benzimidazol-2-yl)sulfanyl]-N'~1~-[(E)-1-(2-pyridyl)methylidene]acetohydrazide	97.47	S(CC(=O)N/N=C/c1ncccc1)c1n(Cc2ccccc2)c2c(n1)cccc2	1	1.64	4.76	-3.32
omega_916654	-8.94099	-10.8329	0.638369	3.87706	3.78719	-2.44536	-3.9653	4		DC	6	2	Y043-0001	6	N-(2-hydroxy-4-methylphenyl)-2-[4-oxo-3(4H)-quinazolinyl]acetamide	82	O=C(Nc1c(O)cc(C)cc1)CN1C(=O)c2c(N=C1)cccc2	23	3.14	3.14	-4.38
omega_207714	-8.94031	-13.1517	0.532133	5.63184	4.29761	-4.28945	-1.96078	7	CL7618	DC	5	2	F223-0344	5	2-[2-(acetylamino)-1,3-benzothiazol-6-yl]-N-(2-chlorobenzyl)acetamide	99.33	Clc1c(CNC(=O)Cc2cc3sc(NC(=O)C)nc3cc2)cccc1	2	2.83	3.4	-6.35
omega_32327	-8.94018	-11.7828	0.778144	5.04895	3.88124	-4.35995	-2.50573	5		DC	6	1	C797-1152	6	N-(4-fluorobenzyl)-8-methoxy-4-oxo-4H-pyrimido[2,1-b][1,3]benzothiazole-3-carboxamide	96.3	Fc1ccc(CNC(=O)C=2C(=O)N3c4c(SC3=NC=2)cc(OC)cc4)cc1	119	3.29	2.92	-4.38
omega_794295	-8.93998	-10.3134	0.531233	4.7202	4.86673	-4.75487	-3.98984	3	CL2436	DC	7	5	8016-5418	7	2-{[(4,6-diamino-2-pyrimidinyl)sulfanyl]methyl}-4(3H)-quinazolinone	144.58	S(CC1=Nc2c(C(=O)N1)cccc2)c1nc(N)cc(N)n1	31	1.1	1.1	-3.84
omega_1212081	-8.9382	-10.9033	0.405813	3.96863	3.72319	-3.99966	-2.13284	2	CL2653	NC	5	1	8407-0796	5	6-benzyl-2,5-dimethyl[1,2,4]triazolo[1,5-a]pyrimidin-7(4H)-one	59.81	O=C1C(Cc2ccccc2)=C(C)Nc2n1nc(C)n2	7	2.56	2.56	-3.87
omega_1291826	-8.93772	-13.326	0.38002	5.04759	3.39484	-1.8776	-2.55658	3	CL8342	NC	3	2	F731-0333	5	N-(8-chloro-11-oxo-10,11-dihydrodibenzo[b,f][1,4]oxazepin-2-yl)benzamide	67.43	Clc1cc2NC(=O)c3c(Oc2cc1)ccc(NC(=O)c1ccccc1)c3	107	3.8	4.12	-5.92
omega_284920	-8.93767	-10.0191	0.627297	4.39082	4.62199	-5.35645	-3.20223	6	CL6481	DC	6	1	G205-0835	7	N-[2-(4-chlorophenyl)ethyl]-5-oxo-2-pyrrolidin-1-yl-5H-[1,3,4]thiadiazolo[3,2-a]pyrimidine-6-carboxamide	102.67	Clc1ccc(CCNC(=O)C=2C(=O)N3N=C(N4CCCC4)SC3=NC=2)cc1	241	3.34	3.42	-5.76
omega_124344	-8.93759	-9.24024	0.423164	3.6711	5.28191	-4.82615	-4.24738	5	CM0132	DC	5	3	D668-0046	7	N-(2-ethylphenyl)-2-hydroxy-6-oxo-1,6-dihydropyrimidine-5-sulfonamide	116.24	S(=O)(=O)(Nc1c(CC)cccc1)C=1C(=O)NC(O)=NC=1	198	-0.1	0.436	0.33
omega_252104	-8.93713	-12.2397	0.696824	4.9497	3.01756	-3.03234	-2.32915	3	CL7852	DC	5	1	F692-0256	5	N-(4-chloro-2-methylphenyl)-7,8-dimethyl-4-oxo-4H-[1,3]thiazino[3,2-a]benzimidazole-2-carboxamide	89.29	Clc1cc(C)c(NC(=O)C=2Sc3n(C(=O)C=2)c2c(n3)cc(C)c(C)c2)cc1	126	4.21	5.28	-5.44
omega_541825	-8.93712	-11.1159	0.414097	3.67396	3.30142	-2.89828	-2.31244	7		DC	5	2	8004-3874	6	2-bromo-N~1~-(2-{2-[(E)-1-(3-furyl)methylidene]hydrazino}-2-oxoethyl)benzamide	83.7	Brc1c(C(=O)NCC(=O)NN=Cc2cocc2)cccc1	3	0.99	0.49	-2.33
omega_1393967	-8.93676	-12.6986	0.455209	5.06937	2.55892	-3.07393	-1.24774	4	CL8573	NC	3	1	L454-0519	3	6-{4-[(4-fluorophenoxy)acetyl]piperazin-1-yl}-1,3-dimethylpyrimidine-2,4(1H,3H)-dione	41.99	Fc1cc(-c2ncc(C(=O)Nc3c(C)cc(C)cc3)cc2)ccc1	53	4.7	4.59	-5.28
omega_22649	-8.93673	-12.9792	0.631233	4.95444	4.764	-3.79373	-2.51343	7	CV0299	DC	5	2	C720-0608	7	2-hydroxy-N-[2-(4-methoxyphenyl)ethyl]-8-methyl-4-oxo-4H-pyrido[1,2-a]pyrimidine-3-carboxamide	91.23	O=C(NCCc1ccc(OC)cc1)C=1C(=O)N2C(=NC=1O)C=C(C)C=C2	64	0.94	1.57	-2
omega_1500108	-8.93578	-11.4322	0.445815	4.02021	4.17312	-3.60614	-2.53657	4	CM0615	NC	3	3	P574-0892	6	2-[2-amino-4-methyl-6-oxo-1(6H)-pyrimidinyl]-N~1~-(2,5-dimethylphenyl)acetamide	87.79	O=C(Nc1c(C)ccc(C)c1)CN1C(N)=NC(C)=CC1=O	112	1.634	1.789	-0.08
omega_539707	-8.93576	-12.6257	0.423571	4.78918	3.11998	-2.17621	-2.46658	4		DC	5	2	8003-9684	5	2-{2-[(E)-1-(4-iodophenyl)methylidene]hydrazino}-N-(2-naphthyl)-2-oxoacetamide	70.56	Ic1ccc(/C=N/NC(=O)C(=O)Nc2cc3c(cc2)cccc3)cc1	24	4.8	4.8	-5.1
omega_1378720	-8.93543	-12.9077	0.396076	4.28703	2.84581	-1.77547	-1.7812	3	CL8915	NC	4	2	L289-0037	5	4-[(4-ethyl-2,3-dioxo-3,4-dihydroquinoxalin-1(2H)-yl)methyl]-N-(3-piperidin-1-ylpropyl)benzamide	67.43	Clc1ccc(CCNC(=O)C2C(=O)Nc3c(O2)cccc3)cc1	6	3.12	2.598	-4.99
omega_277725	-8.93498	-12.3651	0.741845	5.38629	3.59234	-3.93393	-2.35645	4	CL6907	DC	6	0	G020-0636	7	6-(4-fluorobenzyl)-2-methyl-5-[(2-oxo-2-piperidin-1-ylethyl)thio]-2,6-dihydro-7H-pyrazolo[4,3-d]pyrimidin-7-one	96.1	S(CC(=O)N1CCCCC1)C=1N(Cc2ccc(F)cc2)C(=O)c2nn(C)cc2N=1	415	2.78	2.732	-3.39
omega_992503	-8.93498	-10.0731	0.354136	3.40543	3.35129	-2.99681	-2.97591	3	CM3848	IC	4	2	S562-0100	4	N-[(7-oxo-2-azepanyl)methyl]-3-thiophenecarboxamide	86.44	O=C(NCC1NC(=O)CCCC1)c1cscc1	74	2.10033	0.95	0.284961
omega_22654	-8.93467	-10.1952	0.712092	3.69246	5.48907	-4.89585	-3.73722	5	CV0299	DC	5	2	C720-0613	7	2-hydroxy-8-methyl-4-oxo-N-(pyridin-4-ylmethyl)-4H-pyrido[1,2-a]pyrimidine-3-carboxamide	94.89	O=C(NCc1ccncc1)C=1C(=O)N2C(=NC=1O)C=C(C)C=C2	26	-1.13	0.12	-0.38
omega_107098	-8.93458	-13.0448	0.501978	5.16653	4.79491	-4.45595	-1.89726	4	CL6729A	DC	5	1	D458-0726	6	N-(3-chlorophenyl)-2-(5,7-dimethyl-2-propyl[1,2,4]triazolo[1,5-a]pyrimidin-6-yl)acetamide	72.18	Clc1cc(NC(=O)CC2=C(C)n3nc(CCC)nc3N=C2C)ccc1	208	3.62	3.37	-6.25
omega_798500	-8.93395	-10.0977	0.356312	3.94243	4.94639	-4.17262	-3.90881	4	CL1721	DC	5	2	8016-7371	5	N~3~-[2-(1H-1,3-benzimidazol-2-yl)ethyl]nicotinamide	70.67	O=C(NCCc1[nH]c2c(n1)cccc2)c1cnccc1	31	1.62	1.64	-1.88
omega_527757	-8.93366	-12.2605	0.738586	5.05002	4.40217	-3.35281	-3.51108	7		DC	6	2	7646-1280	7	3-({[3-(methoxycarbonyl)-2-methylphenyl]amino}carbonyl)pyridine-2-carboxylic acid	105.59	O=C(OC)c1c(C)c(NC(=O)c2c(C(=O)O)nccc2)ccc1	8	-0.7	1.84	0.31
omega_229511	-8.93264	-14.1141	0.774406	6.61127	3.82617	-4.09931	-1.93104	3	CL3243	DC	3	2	F428-0598	7	N~4~-[2-(1H-indol-3-yl)ethyl]-1-(6-piperidino-3-pyridazinyl)-4-piperidinecarboxamide	72.86	O=C(NCCc1c2c([nH]c1)cccc2)C1CCN(c2nnc(N3CCCCC3)cc2)CC1	1	2.32	2.32	-3.59
omega_1291808	-8.93196	-13.24	0.414684	5.02818	3.53271	-2.1439	-2.52364	3	CL8342	NC	5	2	F731-0255	5	3,4-difluoro-N-(8-methyl-11-oxo-10,11-dihydrodibenzo[b,f][1,4]oxazepin-2-yl)benzamide	67.43	Fc1c(F)ccc(C(=O)Nc2cc3C(=O)Nc4c(Oc3cc2)ccc(C)c4)c1	112	2.64	4.16	-4.35
omega_902113	-8.93111	-13.193	0.465106	5.372	3.82454	-3.68012	-1.71961	6		DC	7	2	Y040-5251	7	N~1~-(2-hydroxy-2-phenylethyl)-2-(1H-1,2,3,4-tetraazol-1-yl)benzamide	92.93	O=C(NCC(O)c1ccccc1)c1c(-n2nnnc2)cccc1	24	1.87255	0.87	-3.0883
omega_579062	-8.9308	-13.014	0.465654	5.43071	2.47847	-2.87652	-1.4151	5	CL2341	DC	4	1	8012-3390	3	2-(1,3-benzothiazol-2-ylsulfanyl)-N~1~-mesitylpropanamide	41.99	S(C(C(=O)Nc1c(C)cc(C)cc1C)C)c1sc2c(n1)cccc2	69	4.26	5.91	-4.13
omega_1063493	-8.93045	-13.0366	0.548625	5.11321	6.26877	-4.73023	-3.09426	4	CM3995	IC	7	3	SB25-1104	7	N-[(3,5-dimethyl-1H-pyrazol-4-yl)methyl]-2-(4-fluorophenyl)-4-oxo-4,5,6,7,8,9-hexahydro-3H-cyclohepta[d]pyrimidine-7-carboxamide	99.24	Fc1ccc(C2=NC3=C(C(=O)N2)CCC(C(=O)NCc2c(C)[nH]nc2C)CC3)cc1	142	2.06	2.06	-4.26
omega_147037	-8.93008	-12.3366	0.680448	4.52128	4.27579	-3.86751	-2.20344	6	CL4819	DC	5	1	E243-0048	7	N-(2-ethoxyphenyl)-2-(4-oxo[1]benzofuro[3,2-d]pyrimidin-3(4H)-yl)acetamide	84.14	O=C(Nc1c(OCC)cccc1)CN1C(=O)c2oc3c(c2N=C1)cccc3	138	2.07	1.85	-2.08
omega_1373001	-8.93004	-12.6785	0.436484	4.46156	2.90101	-2.63593	-1.4147	5	CL8526	NC	5	1	L228-0585	5	5-(2-cyclopropyl-1,3-oxazol-5-yl)-N-(4-methylphenyl)-2-thiophenesulfonamide	108.82	[SH0]([O+H]c1sc(-c2oc(C3CC3)nc2)cc1)([O-])=Nc1ccc(C)cc1	181	4.28	3.79	-5.42
omega_1291803	-8.92975	-13.3455	0.436552	4.92216	3.70971	-1.89467	-2.75797	3	CL8342	NC	3	2	F731-0247	5	3,4-dimethyl-N-(8-methyl-11-oxo-10,11-dihydrodibenzo[b,f][1,4]oxazepin-2-yl)benzamide	67.43	O=C(Nc1cc2C(=O)Nc3c(Oc2cc1)ccc(C)c3)c1cc(C)c(C)cc1	124	3.03	4.45	-5.33
omega_863901	-8.9295	-10.4755	0.385562	4.07377	2.89783	-3.82749	-1.98365	2		DC	5	0	Y010-0853	5	6-(2-methylbenzyl)[1,2,3]thiadiazolo[5,4-d]pyrimidin-7(6H)-one	86.69	O=C1N(Cc2c(C)cccc2)C=Nc2snnc12	1	3.12	3.12	-3.62
omega_955565	-8.92807	-10.6029	0.556579	4.49159	4.85699	-4.72287	-3.50742	3		DC	6	2	Y043-4723	6	N~3~-(7-methoxy-3-quinolyl)-1,4,5,6,7,8-hexahydrocyclohepta[c]pyrazole-3-carboxamide	79.9	O=C(Nc1cnc2c(c1)ccc(OC)c2)c1n[nH]c2c1CCCCC2	30	2.35	2.35	-5.45
omega_1528657	-8.92791	-12.8164	0.754943	5.72512	4.65216	-4.35027	-2.89341	2	CL2352A	NC	1	1	Z223-0040	7	N~1~-(2,6-dimethylphenyl)-2-[4-(1-pyrrolidinyl)-1H-pyrazolo[3,4-d]pyrimidin-1-yl]acetamide	75.94	O=C(Nc1c(C)cccc1C)Cn1ncc2c(N3CCCC3)ncnc12	3	2.108	1.571	-2.43
omega_181632	-8.92762	-13.023	0.652039	5.92014	3.67013	-3.40463	-2.7423	6	CL6032	DC	6	1	E946-0022	7	ethyl 4-[(3-methoxyphenyl)amino]-6-methylfuro[2,3-d]pyrimidine-5-carboxylate	86.48	O=C(OCC)c1c(C)oc2ncnc(Nc3cc(OC)ccc3)c12	125	-0.02	2.84	-2.02
omega_22477	-8.92757	-12.3407	0.683398	5.12988	3.64174	-3.54372	-2.49816	3	CL3531	DC	3	1	C720-0106	5	N-mesityl-4-oxo-4H-pyrido[1,2-a]pyrimidine-3-carboxamide	61.77	O=C(Nc1c(C)cc(C)cc1C)C=1C(=O)N2C(=NC=1)C=CC=C2	28	1.96	1.86	-2.99
omega_561328	-8.92715	-9.74416	0.297398	3.91871	2.55558	-2.18861	-3.76607	6		DC	6	3	8008-5680	5	N'~1~-[(E)-1-(5-bromo-2-hydroxy-3-iodophenyl)methylidene]-2-hydroxybenzohydrazide	81.92	Ic1c(O)c(C=NNC(=O)c2c(O)cccc2)cc(Br)c1	7	4	3.48	-2.17
omega_22675	-8.92667	-9.2977	0.581651	3.38167	4.57593	-4.36241	-3.80581	7	CV0299	DC	5	2	C720-0638	7	2-hydroxy-N-(3-methoxypropyl)-4-oxo-4H-pyrido[1,2-a]pyrimidine-3-carboxamide	91.23	O=C(NCCCOC)C=1C(=O)N2C(=NC=1O)C=CC=C2	41	-1.52	-0.83	0.42
omega_414545	-8.92555	-8.7166	0.477853	3.98981	5.2721	-5.70535	-4.24336	3		DC	5	2	3232-1807	6	2-bromobenzaldehyde (3-oxo-2,3-dihydro-1,2,4-triazin-5-yl)hydrazone	78.21	Brc1c(C=NNC2=NC(=O)NN=C2)cccc1	36	2.04	2.75	-2.04
omega_107076	-8.92478	-12.9326	0.506751	4.98479	5.11444	-4.51352	-2.08467	6	CL6729A	DC	5	1	D458-0678	7	N-(3-acetylphenyl)-2-(2-ethyl-5,7-dimethyl[1,2,4]triazolo[1,5-a]pyrimidin-6-yl)acetamide	89.25	O=C(Nc1cc(C(=O)C)ccc1)CC1=C(C)n2nc(CC)nc2N=C1C	114	2.64	1.99	-4.25
omega_1500127	-8.92478	-11.771	0.467845	4.16511	4.15464	-3.38983	-2.55155	4	CM0615	NC	4	3	P574-0958	6	2-[2-amino-4-methyl-6-oxo-1(6H)-pyrimidinyl]-N~1~-(5-fluoro-2-methylphenyl)acetamide	87.79	Fc1cc(NC(=O)CN2C(N)=NC(C)=CC2=O)c(C)cc1	210	1.233	1.508	0.44
omega_291618	-8.92463	-12.6997	0.526384	4.58466	2.93321	-1.99327	-2.27589	4	CL6241	DC	4	2	G275-0853	5	N-(2,6-dimethylphenyl)-5-(3-methyl-1H-pyrazol-5-yl)thiophene-2-sulfonamide	111.47	[SH0]([O+H]c1sc(-c2[nH]nc(C)c2)cc1)([O-])=Nc1c(C)cccc1C	33	3.68	4.09	-3.73
omega_1474652	-8.92409	-13.3485	0.457015	5.24377	3.16305	-2.36379	-2.07567	5	CL6310	NC	5	2	M830-6456	4	N-(4-fluoro-2-methylphenyl)-2-[(3-fluorophenyl)amino]-4-methyl-1,3-thiazole-5-carboxamide	82.26	Fc1cc(C)c(NC(=O)c2c(C)nc(Nc3cc(F)ccc3)s2)cc1	73	4.055	4.963	-3.63
omega_539941	-8.92406	-11.6335	0.277841	4.21691	3.05638	-2.2835	-2.5582	6		DC	4	2	8004-0051	5	2-{2-[(E)-1-(3-chlorophenyl)methylidene]hydrazino}-N~1~-(2-methylphenyl)-2-oxoacetamide	70.56	Clc1cc(C=NNC(=O)C(=O)Nc2c(C)cccc2)ccc1	55	2.61	3.1	-2.54
omega_22676	-8.92336	-10.3914	0.636828	3.7043	4.64689	-4.263	-3.257	8	CV0299	DC	5	2	C720-0639	7	2-hydroxy-N-(3-isopropoxypropyl)-4-oxo-4H-pyrido[1,2-a]pyrimidine-3-carboxamide	91.23	O=C(NCCCOC(C)C)C=1C(=O)N2C(=NC=1O)C=CC=C2	1	-0.63	-0.11	-0.15
omega_281161	-8.92264	-13.2786	0.368433	4.90027	1.31101	-0.745381	-1.47832	6	CL3105	DC	1	1	G119-0370	3	1,2,3-trimethyl-N-(3-phenylpropyl)-1H-indole-5-carboxamide	34.03	O=C(NCCCc1ccccc1)c1cc2c(C)c(C)n(C)c2cc1	190	5.31	4.53	-5.53
omega_562823	-8.92203	-11.1049	0.386542	3.89219	6.91139	-4.21758	-4.78963	8		DC	11	6	8008-8194	11	N-(2-hydroxyethyl)-N'-[5-({[(2-hydroxyethyl)amino]carbonyl}amino)-1,3-dimethyl-2-oxo-4-imidazolidinyl]urea	146.27	O=C(NCCO)NC1N(C)C(=O)N(C)C1NC(=O)NCCO	17	-2.82	-2.82	15.54
omega_1500392	-8.9216	-11.9079	0.544531	3.80752	5.01002	-3.82307	-2.55269	7	CM0615	NC	5	3	P574-4674	8	2-[2-amino-4-(methoxymethyl)-6-oxo-1(6H)-pyrimidinyl]-N~1~-(4-methoxyphenyl)acetamide	106.25	O=C(Nc1ccc(OC)cc1)CN1C(N)=NC(COC)=CC1=O	21	0.349	0.321	-0.8
omega_553298	-8.92033	-14.2759	0.555986	6.1459	2.38403	-1.29427	-2.43609	8		DC	6	2	8006-7642	5	2-bromo-N~1~-(4-{[(E)-1-(5-bromo-3-ethoxy-2-hydroxyphenyl)methylidene]amino}phenyl)benzamide	70.92	Brc1c(C(=O)Nc2ccc(N=Cc3c(O)c(OCC)cc(Br)c3)cc2)cccc1	38	6.27	5.77	-1.79
omega_1330583	-8.9202	-13.0698	0.35762	4.96256	3.96735	-2.74384	-2.39408	6	CL2674	NC	5	2	G731-0220	5	2-{[5-(2-chlorophenyl)-4H-1,2,4-triazol-3-yl]thio}-N-(2,6-dimethylphenyl)acetamide	95.97	Clc1c(-c2[nH]c(SCC(=O)Nc3c(C)cccc3C)nn2)cccc1	309	4.31	4.48	-6.77
omega_983529	-8.92013	-10.971	0.531265	4.4675	3.61017	-3.65615	-2.9019	3	CM2582	IC	5	3	S451-0371	5	N-(3-fluoro-4-methylphenyl)-3-(1H-pyrrol-2-yl)-1H-pyrazole-5-carboxamide	73.57	Fc1c(C)ccc(NC(=O)c2[nH]nc(-c3[nH]ccc3)c2)c1	55	3.526	2.51	-3.4275
omega_543291	-8.9201	-12.0168	0.298813	4.36526	3.79496	-3.17532	-2.18698	6		DC	4	2	8004-6574	6	N~1~-(2,6-dimethylphenyl)-2-{2-[(E)-1-(5-methyl-2-furyl)methylidene]hydrazino}-2-oxoacetamide	83.7	O=C(NN=Cc1oc(C)cc1)C(=O)Nc1c(C)cccc1C	8	1.82	3.02	-1.49
omega_1083704	-8.91991	-13.1315	0.507821	6.02387	2.69302	-2.27896	-2.73416	3	CM4194	IC	4	1	T508-0138	4	N-cyclobutyl-5-oxo-7-phenyl-1,2,3,5-tetrahydro-8-indolizinecarboxamide	49.41	O=C(NC1CCC1)C=1C(c2ccccc2)=CC(=O)N2C=1CCC2	5	1.43	1.43	-2.38
omega_865858	-8.91933	-12.5685	0.511466	4.5248	5.52396	-4.09413	-2.81693	2	CL2120	DC	6	3	Y020-1325	6	N-[4-amino-6-(1-benzofuran-2-yl)-1,3,5-triazin-2-yl]-N-(3,5-dichlorophenyl)amine	89.86	Clc1cc(Cl)cc(Nc2nc(N)nc(-c3oc4c(c3)cccc4)n2)c1	63	3.7002	5.81	-5.9709
omega_984202	-8.91882	-13.2068	0.298383	4.74405	5.32286	-4.70881	-1.36846	3	CM3807	IC	9	1	S460-0072	9	{3-[4-(3-methyl-1,2,4-oxadiazol-5-yl)-1H-1,2,3-triazol-1-yl]-1-pyrrolidinyl}(1H-pyrrol-2-yl)methanone	105.73	O=C(N1CC(n2nnc(-c3onc(C)n3)c2)CC1)c1[nH]ccc1	76	1.89	1.89	-4.39
omega_284771	-8.91679	-9.49807	0.481916	3.90294	4.60523	-5.28154	-3.12727	4	CL6481	DC	5	1	G205-0357	7	N-isopropyl-2-(4-methylpiperidin-1-yl)-5-oxo-5H-[1,3,4]thiadiazolo[3,2-a]pyrimidine-6-carboxamide	102.67	O=C(NC(C)C)C=1C(=O)N2N=C(N3CCC(C)CC3)SC2=NC=1	21	2.09	2.29	-1.39
omega_1300121	-8.91616	-14.0634	0.390936	5.54354	3.8202	-3.02709	-1.58031	1	CL8429	NC	3	1	F937-1496	4	N-(2,4-dimethylphenyl)-4-methyl-2-(4-methylphenyl)pyrimidine-5-carboxamide	54.88	O=C(Nc1c(C)cc(C)cc1)c1c(C)nc(-c2ccc(C)cc2)nc1	2	2.89	4.2	-5.86
omega_674626	-8.91609	-9.26485	0.34452	3.20743	5.48384	-3.67943	-5.0076	8	CL7174	DC	5	4	C301-7411	7	N-(2,4-dihydroxypyrimidin-5-yl)-N'-(2-phenylethyl)urea	107.37	O=C(NCCc1ccccc1)Nc1c(O)nc(O)nc1	153	-0.31	1.6	1.24
omega_416885	-8.91557	-13.041	0.315275	5.10213	4.26533	-1.82495	-3.73234	4		DC	2	3	3253-4172	6	N'-[(1E)-(5-bromo-2-hydroxyphenyl)methylene]-4,5-dihydro-1H-benzo[g]indazole-3-carbohydrazide	90.37	Brc1cc(C=NNC(=O)c2n[nH]c3-c4c(cccc4)CCc23)c(O)cc1	107	4.63	4.86	-4.13
omega_22618	-8.9155	-8.67634	0.551717	3.23071	4.15989	-4.52526	-3.65622	5	CV0299	DC	4	2	C720-0568	6	2-hydroxy-8-methyl-4-oxo-N-propyl-4H-pyrido[1,2-a]pyrimidine-3-carboxamide	82	O=C(NCCC)C=1C(=O)N2C(=NC=1O)C=C(C)C=C2	88	-0.33	0.56	-1.33
omega_1431643	-8.91509	-12.4764	0.607429	4.50001	5.69772	-4.30874	-2.9351	9	CL9020	NC	4	3	L879-0267	6	N-(1H-indazol-3-ylmethyl)-1-(4-methylphenyl)-5-oxopyrrolidine-3-carboxamide	86.88	Fc1c(CC(=O)NC(C(=O)Nc2[nH]c3c(n2)cccc3)CCC)cccc1	82	2.14	3.44	-2.3
omega_418214	-8.91442	-11.9676	0.439236	5.05742	2.41978	-1.79319	-3.07002	8		DC	5	2	3254-0420	6	2-[(1-ethyl-1H-benzimidazol-2-yl)thio]-N'-[(1E)-1-(2-hydroxyphenyl)ethylidene]acetohydrazide	79.51	S(CC(=O)NN=C(C)c1c(O)cccc1)c1n(CC)c2c(n1)cccc2	42	3.24	3.4	-3.81
omega_107096	-8.91421	-12.5314	0.560907	4.9462	4.73579	-4.49336	-2.13234	4	CL6729A	DC	5	1	D458-0723	6	2-(5,7-dimethyl-2-propyl[1,2,4]triazolo[1,5-a]pyrimidin-6-yl)-N-(4-fluorophenyl)acetamide	72.18	Fc1ccc(NC(=O)CC2=C(C)n3nc(CCC)nc3N=C2C)cc1	166	3.63	2.91	-4.84
omega_376433	-8.91351	-10.9805	0.397582	3.78831	2.63403	-2.92185	-1.83111	6		DC	9	2	1761-1960	10	N'-[(1E)-(3-bromo-5-chloro-2-hydroxyphenyl)methylene]-2-(3-nitro-1H-1,2,4-triazol-1-yl)acetohydrazide	138.22	Brc1c(O)c(C=NNC(=O)Cn2nc([N+](=O)[O-])nc2)cc(Cl)c1	15	0.03	2.06	0.26
omega_627187	-8.91301	-11.4429	0.459331	4.40865	3.04811	-3.4519	-1.93432	4		DC	7	1	8539-0728	5	(2-hydroxyphenyl)(2-phenylpyrazolo[1,5-a]pyrimidin-6-yl)methanone	74.24	O=C(c1c(O)cccc1)C1=Cn2nc(-c3ccccc3)cc2N=C1	2	0.27	0.29	-3.08
omega_614576	-8.913	-9.13042	0.292189	3.48788	4.49394	-4.4651	-3.59149	2		DC	6	2	8018-9304	6	4-(4-nitrophenyl)-1,3-dihydro-2H-imidazol-2-one	86.95	O=[N+]([O-])c1ccc(C=2NC(=O)NC=2)cc1	33	2.26	2.26	-4.13
omega_976847	-8.91144	-14.8548	0.529682	6.54096	2.99614	-2.15358	-1.96988	6	CM1218	IC	6	1	S351-0005	6	5-(2-hydroxy-2-phenylethyl)-2-(3-methoxyphenyl)pyrazolo[1,5-a]pyrazin-4(5H)-one	67.59	O(C)c1cc(-c2nn3c(C(=O)N(CC(O)c4ccccc4)C=C3)c2)ccc1	17	3.7626	2.21	-5.5172
omega_1289568	-8.91001	-10.8119	0.760553	4.29658	3.21461	-4.20479	-2.16504	4	CL7852	NC	5	1	F692-0398	5	N-(2-fluorobenzyl)-7,8-dimethyl-4-oxo-4H-[1,3]thiazino[3,2-a]benzimidazole-2-carboxamide	89.29	Fc1c(CNC(=O)C=2Sc3n(C(=O)C=2)c2c(n3)cc(C)c(C)c2)cccc1	48	2.93	4.35	-4.35
omega_1031978	-8.90962	-8.61214	0.475864	3.91427	4.79842	-5.52146	-3.96457	3	CM4407	IC	6	2	S906-0067	6	N-(2,5-dimethylbenzyl)-3-oxo-2,5,6,7,8,9-hexahydro-3H-[1,2,4]triazolo[4,3-a]azepine-7-carboxamide	73.8	O=C(NCc1c(C)ccc(C)c1)C1CCN2C(=O)NN=C2CC1	28	1.62	1.63	-3.48
omega_380323	-8.90891	-9.53468	0.532946	3.57979	5.362	-4.11834	-4.73063	6		DC	5	4	1936-1960	7	N'-[(1E)-(2,4-dihydroxyphenyl)methylene]-3-methyl-1H-pyrazole-5-carbohydrazide	110.6	O=C(NN=Cc1c(O)cc(O)cc1)c1[nH]nc(C)c1	68	0.15	1.17	1.18
omega_107071	-8.90869	-12.9276	0.525898	5.34421	4.79838	-4.61638	-2.03322	5	CL6729A	DC	7	1	D458-0669	6	2-(2-ethyl-5,7-dimethyl[1,2,4]triazolo[1,5-a]pyrimidin-6-yl)-N-[3-(trifluoromethyl)phenyl]acetamide	72.18	FC(F)(F)c1cc(NC(=O)CC2=C(C)n3nc(CC)nc3N=C2C)ccc1	197	4.81	3.19	-3.97
omega_481082	-8.9084	-10.694	0.406353	3.78815	4.10918	-2.83751	-3.68061	6		DC	4	3	4904-1136	6	N'-(2-hydroxybenzoyl)-2-furohydrazide	91.57	O=C(NNC(=O)c1occc1)c1c(O)cccc1	1	0.49	0.44	0.47
omega_330975	-8.90774	-11.9772	0.603388	4.01874	4.36638	-3.46552	-2.45357	7	CL7259	DC	5	2	G695-0014	7	ethyl 3-{[(2-ethylphenyl)amino]sulfonyl}-1H-pyrazole-5-carboxylate	109.53	[SH0]([O+H]c1n[nH]c(C(=O)OCC)c1)([O-])=Nc1c(CC)cccc1	99	1.96	2.74	-2.04
omega_398681	-8.90768	-12.9363	0.35594	4.42859	2.2858	-1.78478	-1.25693	7		DC	3	2	2425-3829	4	4-Fluoro-benzoic acid N'-(3-phenyl-propionyl)-hydrazide	58.2	Fc1ccc(C(=O)NNC(=O)CCc2ccccc2)cc1	42	0.9	2.57	-1.29
omega_144258	-8.90708	-11.1246	0.726436	4.53771	3.3792	-4.53245	-1.89341	4	CL4665	DC	5	1	E213-0957	5	N-(4-fluorobenzyl)-3-methyl-4-oxo-4,6,7,8-tetrahydropyrrolo[1,2-a]thieno[2,3-d]pyrimidine-2-carboxamide	90.01	Fc1ccc(CNC(=O)c2c(C)c3C(=O)N4C(=Nc3s2)CCC4)cc1	12	1.62	3.04	-3.14
omega_107097	-8.90668	-13.0036	0.542248	5.13353	4.79657	-4.29712	-2.07836	4	CL6729A	DC	5	1	D458-0725	6	N-(2-chlorophenyl)-2-(5,7-dimethyl-2-propyl[1,2,4]triazolo[1,5-a]pyrimidin-6-yl)acetamide	72.18	Clc1c(NC(=O)CC2=C(C)n3nc(CCC)nc3N=C2C)cccc1	155	3.56	3.37	-4.97
omega_330129	-8.90666	-13.6	0.582127	5.52392	2.45492	-2.52541	-1.34221	4	CL3030	DC	3	1	G677-0028	4	N-mesityl-3-methyl-6-phenylimidazo[2,1-b][1,3]thiazole-2-carboxamide	74.64	O=C(Nc1c(C)cc(C)cc1C)C1=C(C)n2c(S1)nc(-c1ccccc1)c2	25	5.34	4.61	-5.87
omega_919736	-8.90652	-10.6956	0.625566	4.66797	5.22082	-4.46194	-4.26333	6		DC	8	4	Y043-7328	8	(2S)-2-({[(1,1-dioxotetrahydro-1H-1lambda~6~-thiophen-3-yl)amino]carbonyl}amino)-N-(3-hydroxyphenyl)-3-methylbutanamide	132.98	O=C(N[C@H](C(=O)Nc1cc(O)ccc1)C(C)C)NC1CS(=O)(=O)CC1	29	-0.0862	-0.0831	-6.4
omega_383892	-8.90548	-10.5897	0.261306	3.75257	3.13874	-4.10499	-1.36336	4		DC	4	1	2043-4016	4	2-chloro-N-(2-furylmethyl)nicotinamide	55.13	Clc1c(C(=O)NCc2occc2)cccn1	26	2.1	0.97	-3.35
omega_913638	-8.90494	-10.8369	0.636506	5.32409	4.49909	-4.87884	-3.64889	7		DC	6	3	Y042-2049	6	N-[(1S)-1-benzyl-2-hydroxyethyl]-3-(3-pyridyl)-1H-pyrazole-5-carboxamide	90.9	O=C(N[C@H](CO)Cc1ccccc1)c1[nH]nc(-c2cnccc2)c1	26	2.35	2.36	-3.27
omega_954646	-8.90409	-13.2036	0.603556	5.29958	4.49687	-3.12433	-2.97614	4		DC	6	2	Y043-1946	6	N~1~-(1H-1,3-benzimidazol-2-yl)-3-(4-methoxy-1H-indol-1-yl)propanamide	71.94	O=C(Nc1[nH]c2c(n1)cccc2)CCn1c2c(c(OC)ccc2)cc1	30	4.16	4.16	-5.07
omega_15036	-8.90344	-13.6689	0.518011	5.64419	3.02682	-2.40364	-2.01987	7	CL3446	DC	5	0	C679-3551	5	7-[(2-allylphenoxy)methyl]-2-propyl-5H-[1,3,4]thiadiazolo[3,2-a]pyrimidin-5-one	79.56	O(CC=1N=C2SC(CCC)=NN2C(=O)C=1)c1c(CC=C)cccc1	12	3.54	4.32	-2.21
omega_933535	-8.90314	-12.3662	0.281554	4.13716	2.53598	-2.18647	-1.30517	2		DC	4	1	Y200-4379	4	N-mesityl-5-methyl-3-isoxazolecarboxamide	55.13	O=C(Nc1c(C)cc(C)cc1C)c1noc(C)c1	8	2.81	2.81	-3.88
omega_396037	-8.90293	-10.3341	0.582937	3.57065	4.0626	-3.40666	-3.37838	7		DC	5	4	2357-3786	7	N'-[(1E)-(2-hydroxy-1-naphthyl)methylene]-2-(5-hydroxy-1H-pyrazol-3-yl)acetohydrazide	110.6	O=C(NN=Cc1c(O)ccc2c1cccc2)Cc1n[nH]c(O)c1	189	0.13	2.09	-0.35
omega_6177	-8.90286	-10.828	0.466818	4.52743	4.84669	-4.26972	-3.64605	5	CL1273	DC	6	2	C612-0726	6	3-(4-Bromo-phenylcarbamoyl)-pyrazine-2-carboxylic acid	92.18	Brc1ccc(NC(=O)c2c(C(=O)O)nccn2)cc1	1	-1.79	1.52	1.04
omega_168027	-8.90222	-13.3528	0.367501	4.95719	3.92312	-3.34829	-1.44897	2	CL5166	DC	4	1	E727-0053	4	N-(2,6-dimethylphenyl)-4-methyl-2-(methylthio)pyrimidine-5-carboxamide	80.18	S(C)c1nc(C)c(C(=O)Nc2c(C)cccc2C)cn1	56	2.33	3.15	-1.28
omega_284737	-8.90191	-10.07	0.515252	3.6541	4.88761	-4.84541	-3.04343	6	CL6481	DC	7	1	G205-0157	9	N-(2-morpholin-4-ylethyl)-5-oxo-2-piperidin-1-yl-5H-[1,3,4]thiadiazolo[3,2-a]pyrimidine-6-carboxamide	115.14	O=C(NCCN1CCOCC1)C=1C(=O)N2N=C(N3CCCCC3)SC2=NC=1	35	0.43	1.14	-1.28
omega_1291821	-8.90151	-13.175	0.446821	4.92935	3.47716	-2.30893	-2.27089	3	CL8342	NC	4	2	F731-0304	5	N-(8-chloro-11-oxo-10,11-dihydrodibenzo[b,f][1,4]oxazepin-2-yl)-3-fluorobenzamide	67.43	Clc1cc2NC(=O)c3c(Oc2cc1)ccc(NC(=O)c1cc(F)ccc1)c3	106	4.21	4.31	-5.82
omega_1342824	-8.9014	-9.63804	0.558391	3.67583	3.73698	-4.1041	-3.13045	5	CL2813A	NC	4	1	G896-0135	5	N-[2-(4-methylphenyl)ethyl]-5-oxo-5H-[1,3]thiazolo[3,2-a]pyrimidine-6-carboxamide	87.07	O=C(NCCc1ccc(C)cc1)C=1C(=O)N2C(SC=C2)=NC=1	90	2.39	1.44	-3.23
omega_551377	-8.90067	-12.2625	0.386487	5.19581	2.67824	-1.49584	-3.40288	3		DC	5	2	8006-3676	5	2-{[(E)-1-(2-hydroxyphenyl)methylidene]amino}dibenzo[b,f][1,4]oxazepin-11(10H)-one	70.92	O=C1Nc2c(Oc3c1cc(/N=C/c1c(O)cccc1)cc3)cccc2	3	3.35	3.36	-4.24
omega_621991	-8.899	-10.9559	0.150743	3.2838	4.07283	-2.0391	-3.41136	3		DC	5	3	8020-1232	5	N-[4-hydroxy-3-(1H-pyrazol-3-yl)phenyl]acetamide	78.01	O=C(Nc1cc(c(O)cc1)-c1n[nH]cc1)C	32	1.05	1.07	-2.6
omega_968063	-8.8981	-12.6969	0.346396	5.09085	3.01348	-2.87454	-1.77736	4	CM1206	IC	5	2	P806-0539	5	2-chloro-4-fluoro-N-[1-(3-phenyl-1H-pyrazol-5-yl)piperidin-3-yl]benzamide	61.02	Clc1c(C(=O)NC2CN(c3[nH]nc(-c4ccccc4)c3)CCC2)ccc(F)c1	38	5.4103	4.82	-7.1949
omega_902795	-8.898	-8.43388	0.424394	2.4642	3.7313	-3.91915	-3.16486	3	CL6871	DC	5	3	Y040-6208	5	2-[(1H-indol-2-ylcarbonyl)amino]acetic acid	82.19	O=C(O)CNC(=O)c1[nH]c2c(c1)cccc2	7	-1.5	2.03	-1.8
omega_1291797	-8.89756	-13.0077	0.429915	4.93077	3.46239	-2.184	-2.52894	3	CL8342	NC	4	2	F731-0231	5	3-fluoro-N-(8-methyl-11-oxo-10,11-dihydrodibenzo[b,f][1,4]oxazepin-2-yl)benzamide	67.43	Fc1cc(C(=O)Nc2cc3C(=O)Nc4c(Oc3cc2)ccc(C)c4)ccc1	62	2.8	4.01	-4.35
omega_1244295	-8.89754	-6.66744	0.409695	2.54768	5.35472	-5.64717	-4.89502	3	CM0132	NC	6	3	D668-0200	7	2-hydroxy-N,4-dimethyl-6-oxo-1,6-dihydropyrimidine-5-sulfonamide	116.24	S(=O)(=O)(NC)C1=C(C)N=C(O)NC1=O	142	-1.87	-1.57	1.21
omega_247474	-8.89721	-11.9098	0.378186	4.26696	3.66812	-3.84185	-1.45883	3	CL8075	DC	7	0	F620-0044	7	3-{[5-(5-bromo-2-furyl)-1,2,4-oxadiazol-3-yl]methyl}-1,3-benzoxazol-2(3H)-one	81.6	Brc1oc(-c2onc(CN3C(=O)Oc4c3cccc4)n2)cc1	130	2.41	2.41	-3.92
omega_87143	-8.8971	-13.8126	0.456907	5.46841	3.90096	-2.94228	-1.96848	5	CL7372	DC	4	2	D351-0307	6	2-(4-tert-butylphenyl)-5-{[(2-chlorophenyl)amino]methyl}[1,2,4]triazolo[1,5-a]pyrimidin-7(4H)-one	71.84	Clc1c(NCC=2Nc3n(C(=O)C=2)nc(-c2ccc(C(C)(C)C)cc2)n3)cccc1	193	3.8	4.41	-4.03
omega_384369	-8.89689	-11.0144	0.37549	4.27218	3.08578	-3.94935	-1.6666	6		DC	6	1	2061-0020	5	2-(2,4-dichlorophenoxy)-N'-[(1E)-pyridin-2-ylmethylene]acetohydrazide	63.58	Clc1c(OCC(=O)NN=Cc2ncccc2)ccc(Cl)c1	7	2.06	3.69	-4.4
omega_968075	-8.89677	-11.7917	0.408924	4.50044	4.1852	-4.23683	-1.96277	4	CM1206	IC	6	2	P806-0564	6	6-methyl-N-[1-(3-phenyl-1H-pyrazol-5-yl)-3-piperidyl]nicotinamide	73.91	O=C(NC1CN(c2[nH]nc(-c3ccccc3)c2)CCC1)c1cnc(C)cc1	56	3.6	3.61	-3.8
omega_358029	-8.89673	-12.2178	0.248872	4.77078	2.48169	-1.87889	-2.30138	6		DC	4	2	0784-0384	5	3-Hydroxy-naphthalene-2-carboxylic acid (4-methoxy-benzylidene)-hydrazide	70.92	O=C(NN=Cc1ccc(OC)cc1)c1c(O)cc2c(c1)cccc2	51	2.54	3.31	-3.33
omega_1233758	-8.89594	-13.5611	0.580202	6.11452	4.12724	-3.43844	-2.71835	5	CL7372	NC	4	2	D351-0310	6	2-(4-tert-butylphenyl)-5-{[(5-chloro-2-methylphenyl)amino]methyl}[1,2,4]triazolo[1,5-a]pyrimidin-7(4H)-one	71.84	Clc1cc(NCC=2Nc3n(C(=O)C=2)nc(-c2ccc(C(C)(C)C)cc2)n3)c(C)cc1	210	4.17	4.9	-4.43
omega_87093	-8.89568	-12.6709	0.502975	5.63515	4.57053	-4.02697	-2.90647	3	CL7372	DC	4	2	D351-0154	7	5-{[(3-methoxyphenyl)amino]methyl}-2-(4-methylphenyl)[1,2,4]triazolo[1,5-a]pyrimidin-7(4H)-one	81.07	O(C)c1cc(NCC=2Nc3n(C(=O)C=2)nc(-c2ccc(C)cc2)n3)ccc1	113	2.72	2.81	-2.62
omega_391321	-8.89561	-9.66634	0.425272	4.2747	5.09867	-5.68229	-3.34562	7		DC	5	2	2235-0045	6	2-fluoro-N-(2-oxo-2-{2-[(E)-1-(2-pyridyl)methylidene]hydrazino}ethyl)benzamide	83.45	Fc1c(C(=O)NCC(=O)NN=Cc2ncccc2)cccc1	1	0.9	1.79	-1.98
omega_1004666	-8.89516	-9.92028	0.546609	4.10251	3.95566	-4.25082	-3.32884	2	CM4193	IC	8	1	S636-0527	8	4-[(3-oxo-2,3,5,6,8,9-hexahydro-7H-[1,2,4]triazolo[4,3-d][1,4]diazepin-7-yl)sulfonyl]benzonitrile	114.25	S(=O)(=O)(N1CCN2C(=O)NN=C2CC1)c1ccc(C#N)cc1	84	0.6	0.64	-4.02
omega_47045	-8.89471	-11.5732	0.459414	4.62564	3.72478	-3.98199	-2.14931	3	CL2653	DC	4	1	D043-0127	6	6-benzyl-5-methyl-2-pyridin-3-yl[1,2,4]triazolo[1,5-a]pyrimidin-7(4H)-one	72.7	O=C1C(Cc2ccccc2)=C(C)Nc2n1nc(-c1cnccc1)n2	38	0.84	2.4	1.59
omega_900452	-8.89393	-12.4258	0.692698	4.7332	5.68754	-5.18629	-2.39532	6	CL0755	DC	7	3	Y040-3226	7	N~2~-(2-{[2-(1H-indol-3-yl)ethyl]amino}-2-oxoethyl)-2,3-dihydro-1,4-benzodioxine-2-carboxamide	92.45	O=C(NCCc1c2c([nH]c1)cccc2)CNC(=O)C1Oc2c(OC1)cccc2	8	1.64351	3.06	-4.5546
omega_56556	-8.89391	-10.4054	0.847735	4.4885	4.50801	-4.7446	-3.58814	8	CL5254	DC	6	3	D133-0002	7	ethyl 4-amino-2-{[2-oxo-2-(2-toluidino)ethyl]sulfanyl}-5-pyrimidinecarboxylate	132.5	S(CC(=O)Nc1c(C)cccc1)c1nc(N)c(C(=O)OCC)cn1	210	2.9	2.23	-2.81
omega_405303	-8.8939	-11.3779	0.24006	3.82414	3.16298	-3.27818	-1.46501	4		DC	3	1	2857-1530	4	N-(3-Methoxy-phenyl)-nicotinamide	51.22	O=C(Nc1cc(OC)ccc1)c1cnccc1	3	2.08	1.45	-2.4
omega_222680	-8.89385	-13.3491	0.226121	6.21853	2.92192	-2.81715	-2.09416	6	CL7928	DC	4	2	F378-0047	6	ethyl 4-{[(2,3-dimethylphenyl)amino]sulfonyl}-3,5-dimethyl-1H-pyrrole-2-carboxylate	96.64	[SH0](=O)(ONc1c(C)c(C)ccc1)c1c(C)c(C(=O)OCC)[nH]c1C	63	3.63	3.51	-5.15
omega_103323	-8.89362	-12.4428	0.396076	4.57892	4.51381	-3.90785	-2.03173	3	CL8250	DC	4	2	D433-1473	6	6-benzyl-2-{[(5-chloro-2-methylphenyl)amino]methyl}-5-methyl[1,2,4]triazolo[1,5-a]pyrimidin-7(4H)-one	71.84	Clc1cc(NCc2nn3C(=O)C(Cc4ccccc4)=C(C)Nc3n2)c(C)cc1	209	3.11	4.09	-2.61
omega_277741	-8.89315	-14.613	0.881212	7.13942	3.67347	-3.84953	-2.12468	6	CL5886	DC	6	0	G020-1069	7	2-ethyl-6-(2-fluorobenzyl)-5-{[2-(4-methylpiperidin-1-yl)-2-oxoethyl]thio}-2,6-dihydro-7H-pyrazolo[4,3-d]pyrimidin-7-one	96.1	S(CC(=O)N1CCC(C)CC1)C=1N(Cc2c(F)cccc2)C(=O)c2nn(CC)cc2N=1	148	4.21	3.332	-5.42
omega_1474617	-8.89263	-13.4611	0.365579	5.48322	3.13753	-2.51167	-1.90619	5	CL6310	NC	4	2	M830-6403	4	N-(2,3-dimethylphenyl)-2-[(3-fluorophenyl)amino]-4-methyl-1,3-thiazole-5-carboxamide	82.26	Fc1cc(Nc2sc(C(=O)Nc3c(C)c(C)ccc3)c(C)n2)ccc1	134	3.434	5.244	-4.3
omega_1361712	-8.89239	-12.0182	0.296742	4.13757	3.03584	-1.93488	-2.40944	8	CL3141	NC	4	2	K844-0792	5	(4-Hydroxy-2-oxo-1,2-dihydro-quinolin-3-yl)-acetic acid pentyl ester	75.63	O=C(OCCCCC)CC=1C(=O)Nc2c(C=1O)cccc2	28	2.23	2.32	-1.38
omega_143393	-8.89056	-15.6599	0.617464	5.81939	3.68022	-1.34467	-2.00309	4	CL1509	DC	5	0	E208-0020	8	4-(1-methyl[1,2,4]triazolo[4,3-a]quinoxalin-4-yl)-1-(2-phenylethyl)piperazine-2,6-dione	83.7	O=C1N(CCc2ccccc2)C(=O)CN(C2=Nc3c(-n4c(C)nnc24)cccc3)C1	69	2.02	3.32	-2.29
omega_572665	-8.89055	-12.0702	0.383121	4.55901	3.06209	-2.30088	-2.52372	4		DC	5	2	8010-5263	5	N~1~-(1-naphthyl)-2-oxo-2-{2-[(E)-1-(2-thienyl)methylidene]hydrazino}acetamide	98.8	O=C(N/N=C/c1sccc1)C(=O)Nc1c2c(ccc1)cccc2	6	3.32	3.32	-4.66
omega_1468843	-8.88973	-12.4586	0.519525	4.71865	2.78538	-3.51606	-0.938626	5	CL9787	NC	4	1	M626-0092	4	2-chloro-4-fluoro-N-[(6-pyrrolidin-1-ylpyridin-3-yl)methyl]benzamide	45.23	Clc1c(C(=O)NCc2cnc(N3CCCC3)cc2)ccc(F)c1	6	2.964	3.503	-6.13
omega_1222951	-8.88844	-14.4514	0.54673	6.09446	4.28946	-2.47623	-2.89143	6	CL3447	NC	8	1	C679-2662	6	2-({[2-(2-chlorophenyl)-5-oxo-5H-[1,3,4]thiadiazolo[3,2-a]pyrimidin-7-yl]methyl}thio)benzoic acid	132.93	Clc1c(C=2SC=3N(C(=O)C=C(CSc4c(C(=O)O)cccc4)N=3)N=2)cccc1	44	0.15	4.68	-1.63
omega_124416	-8.88787	-10.202	0.210861	3.48505	5.28235	-4.49622	-3.16789	4	CM0132	DC	6	3	D668-0207	7	N-(tert-butyl)-2-hydroxy-4-methyl-6-oxo-1,6-dihydropyrimidine-5-sulfonamide	116.24	S(=O)(=O)(NC(C)(C)C)C1=C(C)N=C(O)NC1=O	130	0.21	-0.638	-0.89
omega_1255560	-8.887	-11.6956	0.645978	4.95544	4.61581	-4.6593	-2.74933	3	CL5555	NC	5	1	E714-0138	7	N-(4-chlorobenzyl)-2-(4-oxo-7,8,9,10-tetrahydro-4H-azepino[1,2-e]purin-3(6H)-yl)acetamide	79.59	Clc1ccc(CNC(=O)CN2C(=O)c3nc4n(c3N=C2)CCCCC4)cc1	160	2.43	1.666	-2.5
omega_285098	-8.88656	-8.90574	0.475993	3.15968	4.56972	-5.07309	-3.11313	4	CL6481	DC	5	1	G205-2326	7	N-cyclopropyl-2-(3-methylpiperidin-1-yl)-5-oxo-5H-[1,3,4]thiadiazolo[3,2-a]pyrimidine-6-carboxamide	102.67	O=C(NC1CC1)C=1C(=O)N2N=C(N3CC(C)CCC3)SC2=NC=1	71	2.32	2.12	-2.27
omega_908001	-8.88628	-11.5781	0.52106	5.05482	3.09482	-3.43944	-2.53949	5		DC	4	2	Y041-2730	4	2-[4-(4-bromophenyl)-1H-pyrazol-3-yl]-5-ethoxyphenol	58.14	Brc1ccc(-c2c(-c3c(O)cc(OCC)cc3)n[nH]c2)cc1	5	4.84	4.9	-5.4
omega_908996	-8.88586	-12.8871	0.290469	4.6583	3.48693	-2.32333	-2.11116	5		DC	5	2	Y041-3978	5	N-[2-(1H-imidazol-5-yl)ethyl]-2-(1-methyl-1H-indol-3-yl)acetamide	62.71	O=C(NCCc1[nH]cnc1)Cc1c2c(n(C)c1)cccc2	4	0.98	1.29	0.49
omega_1373007	-8.88575	-12.7728	0.359455	4.49028	2.91933	-2.59676	-1.28528	5	CL8526	NC	5	1	L228-0624	5	5-(2-cyclopropyl-1,3-oxazol-5-yl)-N-phenylthiophene-2-sulfonamide	108.82	[SH0]([O+H]c1sc(-c2oc(C3CC3)nc2)cc1)([O-])=Nc1ccccc1	194	3.81	3.31	-6.41
omega_92058	-8.88513	-12.8256	0.722597	5.85709	3.20076	-2.47028	-3.36966	3	CL7379	DC	7	3	D364-0578	7	6-hydroxy-3-methyl-5-[5-(1-naphthyl)-4,5-dihydro-1H-pyrazol-3-yl]-2,4(1H,3H)-pyrimidinedione	94.03	O=C1N(C)C(=O)NC(O)=C1C1=NNC(c2c3c(ccc2)cccc3)C1	3	-0.77	2.51	-3.86
omega_124446	-8.88495	-8.21607	0.57147	3.60408	5.17396	-5.45369	-4.56471	4	CM0132	DC	6	3	D668-0253	7	N-(4-chlorophenyl)-2-hydroxy-4-methyl-6-oxo-1,6-dihydropyrimidine-5-sulfonamide	116.24	Clc1ccc(NS(=O)(=O)C2=C(C)N=C(O)NC2=O)cc1	202	0.89	0.671	-0.35
omega_147056	-8.88495	-12.8077	0.559285	5.10189	4.08611	-2.99086	-2.83372	4	CL4819	DC	4	1	E243-0069	6	N-cyclohexyl-2-(4-oxo[1]benzofuro[3,2-d]pyrimidin-3(4H)-yl)acetamide	74.91	O=C(NC1CCCCC1)CN1C(=O)c2oc3c(c2N=C1)cccc3	83	1.4	1.8	-1.1
omega_875310	-8.88392	-11.38	0.315619	4.15975	2.61265	-3.15366	-1.43828	1		DC	3	1	Y030-0565	3	N-(2,5-dichlorophenyl)nicotinamide	41.99	Clc1c(NC(=O)c2cnccc2)cc(Cl)cc1	26	3.01	3.01	-4.22
omega_1234015	-8.88387	-11.7103	0.620836	4.97701	3.46463	-3.68929	-2.54679	4	CL2813A	NC	4	1	D358-0041	5	N-(2-ethyl-6-methylphenyl)-5-oxo-5H-[1,3]thiazolo[3,2-a]pyrimidine-6-carboxamide	87.07	O=C(Nc1c(CC)cccc1C)C=1C(=O)N2C(SC=C2)=NC=1	138	2.3	2.06	-2.37
omega_617787	-8.88288	-11.4329	0.317808	3.85777	3.37518	-2.59845	-2.40225	4		DC	5	2	8019-4626	5	3-(4-ethoxyphenyl)-1H-pyrazole-5-carboxylic acid	75.21	O=C(O)c1[nH]nc(-c2ccc(OCC)cc2)c1	32	-0.065	2.97	-3.6
omega_398596	-8.88284	-11.9136	0.54461	5.47902	2.10665	-1.88802	-3.21156	8		DC	5	2	2423-5127	6	2-[(1-ethyl-1H-benzimidazol-2-yl)thio]-N'-[(1E)-(2-hydroxy-1-naphthyl)methylene]acetohydrazide	79.51	S(CC(=O)NN=Cc1c(O)ccc2c1cccc2)c1n(CC)c2c(n1)cccc2	424	3.74	4.33	-4.92
omega_554135	-8.88223	-9.4712	0.470882	2.91828	5.05828	-4.67532	-3.18314	5		DC	6	3	8006-9295	6	3-bromo-N-(2-oxo-2-{2-[(E)-1-(1H-pyrrol-2-yl)methylidene]hydrazino}ethyl)benzamide	86.35	Brc1cc(C(=O)NCC(=O)N/N=C/c2[nH]ccc2)ccc1	4	2.83	2.83	-3.91
omega_22580	-8.8801	-9.75926	0.620865	4.22211	4.08905	-4.44271	-3.61016	6	CV0299	DC	4	2	C720-0512	6	2-hydroxy-9-methyl-N-(3-methylbutyl)-4-oxo-4H-pyrido[1,2-a]pyrimidine-3-carboxamide	82	O=C(NCCC(C)C)C=1C(=O)N2C(C(C)=CC=C2)=NC=1O	55	0.43	1.37	-1.78
omega_1474381	-8.8786	-13.383	0.420914	5.31441	3.16018	-2.46869	-1.92246	5	CL6310	NC	3	2	M830-1905	4	2-anilino-N-(2,5-dimethylphenyl)-4-methyl-1,3-thiazole-5-carboxamide	82.26	O=C(Nc1c(C)ccc(C)c1)c1c(C)nc(Nc2ccccc2)s1	31	3.355	5.039	-3.73
omega_343447	-8.87828	-12.1215	0.220169	4.50341	3.47104	-2.85332	-2.0981	3	CL2892	DC	5	3	G801-0135	6	N-(3,4-difluorophenyl)-2-oxo-2,3-dihydro-1H-benzimidazole-5-sulfonamide	95.68	[SH0]([O+H]c1cc2NC(=O)Nc2cc1)([O-])=Nc1cc(F)c(F)cc1	58	0.48	1.59	-3.3
omega_1197210	-8.87788	-11.1112	0.405596	5.1376	3.35456	-3.74344	-2.92102	5	CL2726	DC	5	1	V029-6506	5	1-(4-methylphenyl)-5-oxo-N~3~-[2-(2-pyridyl)ethyl]-3-pyrrolidinecarboxamide	62.3	O=C(NCCc1ncccc1)C1CN(c2ccc(C)cc2)C(=O)C1	1	3.17	3.17	-3.2
omega_1037968	-8.87702	-13.3197	0.625534	5.61667	4.04772	-3.14345	-2.70376	6	CM3433	IC	6	2	S959-2433	6	N-{2-[3-(acetylamino)-2-oxo-1-pyrrolidinyl]ethyl}-2-(4-fluorophenyl)acetamide	78.51	Fc1ccc(CC(=O)NCCN2C(=O)C(NC(=O)C)CC2)cc1	7	-0.28	-0.28	-2.21
omega_47040	-8.8767	-11.8999	0.45009	4.46875	3.80438	-3.58417	-2.11589	3	CL2653	DC	3	1	D043-0119	5	6-benzyl-5-methyl-2-phenyl[1,2,4]triazolo[1,5-a]pyrimidin-7(4H)-one	59.81	O=C1C(Cc2ccccc2)=C(C)Nc2n1nc(-c1ccccc1)n2	18	2.04	3.56	-1.69
omega_387118	-8.87647	-12.1923	0.399001	5.11339	2.18974	-1.00507	-3.38119	5		DC	3	2	2142-0234	4	6-{[(2,5-dimethylphenyl)amino]carbonyl}cyclohex-3-ene-1-carboxylic acid	66.4	O=C(O)C1C(C(=O)Nc2c(C)ccc(C)c2)CC=CC1	2	1.29	2.764	-1.14
omega_976855	-8.87567	-15.3901	0.544495	6.80286	2.65368	-1.88436	-1.60222	5	CM1218	IC	5	1	S351-0203	5	2-(3-bromophenyl)-5-[2-(2,5-dimethylphenyl)-2-hydroxyethyl]pyrazolo[1,5-a]pyrazin-4(5H)-one	58.36	Brc1cc(-c2nn3c(C(=O)N(CC(O)c4c(C)ccc(C)c4)C=C3)c2)ccc1	8	4.24	4.24	-5.04
omega_107169	-8.8756	-12.2795	0.595625	5.25622	6.4429	-4.25391	-4.63694	6	CL8727	DC	4	3	D459-0006	8	N-(1H-benzimidazol-2-ylmethyl)-3-(2,4-dioxo-3,4-dihydropyrimidin-1(2H)-yl)propanamide	107.19	O=C(NCc1[nH]c2c(n1)cccc2)CCN1C(=O)NC(=O)C=C1	127	1.37	0.21	-1.06
omega_335200	-8.87493	-10.888	0.41342	3.87321	4.79555	-3.51552	-3.55357	4	CL7215	DC	5	2	G751-1858	5	6-chloro-2-{[(5-ethyl-4H-1,2,4-triazol-3-yl)thio]methyl}quinolin-4(1H)-one	95.97	Clc1cc2C(=O)C=C(CSc3[nH]c(CC)nn3)Nc2cc1	28	1.41	2.68	-2.59
omega_504978	-8.87488	-12.7177	0.572362	5.33453	2.84589	-2.95906	-1.9509	3	CL0699	DC	4	1	6049-1433	6	N-(9,10-dioxo-9,10-dihydroanthracen-1-yl)-1-methyl-1H-pyrazole-3-carboxamide	81.06	O=C(Nc1c2C(=O)c3c(C(=O)c2ccc1)cccc3)c1nn(C)cc1	9	1.71	2.37	-0.84
omega_113308	-8.87477	-12.7776	0.534155	5.88794	4.18329	-3.92036	-2.78222	4	CL7372	DC	3	2	D489-0196	6	2-(3,4-dimethylphenyl)-5-{[(4-methylphenyl)amino]methyl}[1,2,4]triazolo[1,5-a]pyrimidin-7(4H)-one	86.9	Clc1c(Cl)ccc(Nc2c(C#N)c(-c3ccc(C)cc3)nc(SC)n2)c1	155	-2.15	3.8	2.68
omega_947013	-8.87372	-11.6792	0.531896	5.3017	3.08289	-3.53515	-2.57583	5		DC	4	2	8020-1154	4	2-[4-(4-chlorophenyl)-1H-pyrazol-3-yl]-5-ethoxyphenol	58.14	Clc1ccc(-c2c(-c3c(O)cc(OCC)cc3)n[nH]c2)cc1	31	4.67	4.73	-5.41
omega_1520453	-8.87356	-10.994	0.629044	4.23324	2.10896	-2.99535	-1.85547	4	CM0993	NC	3	1	T403-0011	6	N-(2,3-dihydro-1H-inden-5-yl)-1-[1,2,4]triazolo[4,3-a]pyridin-3-ylpiperidine-3-carboxamide	62.53	O=C(Nc1cc2c(cc1)CCC2)C1CN(c2n3c(nn2)C=CC=C3)CCC1	9	4.055	4.019	-4.8
omega_1528929	-8.873	-13.4854	0.610405	5.70174	4.54802	-3.934	-2.31373	4	CL2352A	NC	1	1	Z223-1808	7	N~1~-(2-chlorobenzyl)-2-[4-(4-methylpiperidino)-1H-pyrazolo[3,4-d]pyrimidin-1-yl]acetamide	75.94	Clc1c(CNC(=O)Cn2ncc3c(N4CCC(C)CC4)ncnc23)cccc1	1	3.813	2.503	-3.44
omega_41615	-8.87262	-13.9162	0.405616	6.59952	3.79134	-4.11158	-1.64128	8	CL4403A	DC	3	1	C999-0238	5	2-(5,7-dimethyl-2-phenylpyrazolo[1,5-a]pyrimidin-6-yl)-N-(3-phenylpropyl)acetamide	59.29	O=C(NCCCc1ccccc1)CC1=C(C)n2nc(-c3ccccc3)cc2N=C1C	184	5.77	4.48	-4.85
omega_553046	-8.87249	-12.47	0.413785	5.09706	2.9364	-2.39447	-2.45531	6		DC	4	2	8006-7075	5	2-{2-[(E)-1-(2-fluorophenyl)methylidene]hydrazino}-N~1~-mesityl-2-oxoacetamide	70.56	Fc1c(C=NNC(=O)C(=O)Nc2c(C)cc(C)cc2C)cccc1	62	2.24	3.61	-1.38
omega_252135	-8.87205	-12.0295	0.718197	4.89015	3.31102	-3.76258	-1.99937	6	CL7852	DC	6	1	F692-0410	6	N-{[1-(4-chlorobenzyl)piperidin-4-yl]methyl}-7,8-dimethyl-4-oxo-4H-[1,3]thiazino[3,2-a]benzimidazole-2-carboxamide	92.53	Clc1ccc(CN2CCC(CNC(=O)C=3Sc4n(C(=O)C=3)c3c(n4)cc(C)c(C)c3)CC2)cc1	149	3.97	5.49	-4.67
omega_47319	-8.87195	-7.04543	0.231233	2.62421	3.81616	-4.61947	-3.87866	1	CL5633	DC	4	1	D047-0037	4	5-(2-fluorophenyl)-2H-tetrazole	54.46	Fc1c(-c2n[nH]nn2)cccc1	224	1.37	1.41	-0.57
omega_1533034	-8.87188	-9.93708	0.471062	4.98234	3.41164	-4.13361	-3.66622	4	CL1667	NC	2	2	Z603-9323	4	N~4~-allyl-8-chloro-2-hydroxy-4-quinolinecarboxamide	62.22	Clc1c2nc(O)cc(C(=O)NCC=C)c2ccc1	178	2.353	2.791	-2.55
omega_6267	-8.87156	-11.9544	0.450333	4.44658	6.11735	-4.26148	-3.6699	5	CL1273	DC	7	2	C612-1047	9	3-{[(4-nitrophenyl)amino]carbonyl}pyrazine-2-carboxylic acid	138	O=[N+]([O-])c1ccc(NC(=O)c2c(C(=O)O)nccn2)cc1	126	-2.82	0.67	2.27
omega_281215	-8.87149	-13.3638	0.358921	5.20789	1.20147	-0.89573	-1.38028	7	CL3105	DC	1	1	G119-0680	3	1-ethyl-2,3-dimethyl-N-(3-phenylpropyl)-1H-indole-5-carboxamide	34.03	O=C(NCCCc1ccccc1)c1cc2c(C)c(C)n(CC)c2cc1	219	5.91	4.88	-7.62
omega_87080	-8.87058	-11.9688	0.517678	5.22405	4.17598	-4.01893	-2.80056	2	CL7372	DC	3	2	D351-0135	6	5-(anilinomethyl)-2-(4-methylphenyl)[1,2,4]triazolo[1,5-a]pyrimidin-7(4H)-one	71.84	O=C1n2nc(-c3ccc(C)cc3)nc2NC(CNc2ccccc2)=C1	170	0.58	2.83	-2.43
omega_1449914	-8.86998	-11.8193	0.373884	4.45601	3.09634	-3.45497	-1.52192	4	CL9502	NC	5	2	M100-0047	6	N-(2,3-dimethylphenyl)-4-(6-oxo-1,6-dihydropyridazin-3-yl)thiophene-2-sulfonamide	124.25	S(=O)(=O)(Nc1c(C)c(C)ccc1)c1scc(C2=NNC(=O)C=C2)c1	151	3.277	2.531	-3.07
omega_124352	-8.8697	-8.83657	0.3745	3.18966	5.21114	-5.23079	-3.57763	4	CM0132	DC	6	3	D668-0054	7	N-(3-chlorophenyl)-2-hydroxy-6-oxo-1,6-dihydropyrimidine-5-sulfonamide	116.24	Clc1cc(NS(=O)(=O)C=2C(=O)NC(O)=NC=2)ccc1	208	0.43	0.158	-0.6
omega_124341	-8.86943	-12.4994	0.333424	4.10588	5.04837	-2.98924	-2.86851	4	CM0132	DC	5	3	D668-0041	7	N-(2,5-dimethylphenyl)-2-hydroxy-6-oxo-1,6-dihydropyrimidine-5-sulfonamide	116.24	S(=O)(=O)(Nc1c(C)ccc(C)c1)C=1C(=O)NC(O)=NC=1	139	0.16	0.466	0.53
omega_1533022	-8.86937	-9.87712	0.50775	5.19441	3.40784	-4.03719	-4.06507	4	CL1667	NC	2	2	Z603-9283	4	N~4~-(sec-butyl)-2-hydroxy-4-quinolinecarboxamide	62.22	O=C(NC(CC)C)c1c2c(nc(O)c1)cccc2	222	0.41	2.956	-1.51
omega_155335	-8.86876	-13.1928	0.492782	5.29596	3.51093	-3.0948	-1.88085	1	CL4837	DC	7	1	E559-0153	6	N-(2,4-difluorophenyl)-7-methyl-5-oxo-5H-[1,3]thiazolo[3,2-a]pyrimidine-6-sulfonamide	112.52	[SH0]([O+H]C=1C(=O)N2C(SC=C2)=NC=1C)([O-])=Nc1c(F)cc(F)cc1	73	1.25	1	-2.93
omega_1291827	-8.86874	-13.2373	0.483555	5.07402	3.5978	-2.17494	-2.61187	3	CL8342	NC	3	2	F731-0334	5	N-(8-chloro-11-oxo-10,11-dihydrodibenzo[b,f][1,4]oxazepin-2-yl)-3-methylbenzamide	67.43	Clc1cc2NC(=O)c3c(Oc2cc1)ccc(NC(=O)c1cc(C)ccc1)c3	116	4.21	4.45	-5.68
omega_1525736	-8.86848	-14.3843	0.492239	6.25385	2.20879	-2.34272	-1.09639	4	CM1573	NC	4	0	T743-0092	5	5-[1-(3-methylbenzyl)-1H-pyrrol-2-yl]-3-(4-pyridyl)-1,2,4-oxadiazole	56.74	C(n1c(-c2onc(-c3ccncc3)n2)ccc1)c1cc(C)ccc1	112	2.838	3.1	-5.69
omega_284947	-8.8681	-9.54239	0.467618	4.1158	4.60306	-5.39197	-3.12022	6	CL6481	DC	5	1	G205-0927	7	N-butyl-5-oxo-2-pyrrolidin-1-yl-5H-[1,3,4]thiadiazolo[3,2-a]pyrimidine-6-carboxamide	102.67	O=C(NCCCC)C=1C(=O)N2N=C(N3CCCC3)SC2=NC=1	34	2.45	2.18	-4.73
omega_284916	-8.86781	-9.76877	0.648246	4.01713	4.59968	-5.30405	-3.06004	5	CL6481	DC	5	1	G205-0824	7	N-benzyl-5-oxo-2-pyrrolidin-1-yl-5H-[1,3,4]thiadiazolo[3,2-a]pyrimidine-6-carboxamide	102.67	O=C(NCc1ccccc1)C=1C(=O)N2N=C(N3CCCC3)SC2=NC=1	108	1.64	2.44	-3.92
omega_22713	-8.86778	-10.1646	0.652463	3.80206	5.01651	-4.46682	-3.70742	9	CV0299	DC	5	2	C720-0687	7	N-[3-(diethylamino)-2-methylpropyl]-2-hydroxy-4-oxo-4H-pyrido[1,2-a]pyrimidine-3-carboxamide	85.24	O=C(NCC(CN(CC)CC)C)C=1C(=O)N2C(=NC=1O)C=CC=C2	7	0.08	0.58	-1.47
omega_106923	-8.86773	-12.6888	0.658409	5.29949	4.72276	-4.65996	-2.19966	3	CL6729A	DC	4	1	D458-0361	6	2-[5,7-dimethyl-2-(3-methylphenyl)[1,2,4]triazolo[1,5-a]pyrimidin-6-yl]-N-(3-methylphenyl)acetamide	72.18	O=C(Nc1cc(C)ccc1)CC1=C(C)n2nc(-c3cc(C)ccc3)nc2N=C1C	222	3.23	4.22	-3.79
omega_672694	-8.86737	-13.3523	0.518581	5.33678	3.46054	-3.08296	-1.748	1	CL4837	DC	5	1	C301-3827	6	N-(2,4-dimethylphenyl)-7-methyl-5-oxo-5H-[1,3]thiazolo[3,2-a]pyrimidine-6-sulfonamide	112.52	[SH0]([O+H]C=1C(=O)N2C(SC=C2)=NC=1C)([O-])=Nc1c(C)cc(C)cc1	59	1.73	1.56	-2.22
omega_649872	-8.86724	-9.95428	0.416275	3.43068	5.76911	-3.68599	-4.84304	4	CL6348	DC	3	6	C200-4329	7	5-amino-3-[(4-methoxyphenyl)amino]-1H-pyrazole-4-carboxamide	119.05	O=C(N)c1c(N)[nH]nc1Nc1ccc(OC)cc1	2	0.13	0.73	-0.33
omega_107084	-8.86634	-12.882	0.561388	5.26516	4.79815	-4.59534	-2.01372	3	CL6729A	DC	4	1	D458-0688	6	N-(2,3-dimethylphenyl)-2-(2-ethyl-5,7-dimethyl[1,2,4]triazolo[1,5-a]pyrimidin-6-yl)acetamide	72.18	O=C(Nc1c(C)c(C)ccc1)CC1=C(C)n2nc(CC)nc2N=C1C	30	2.74	3.22	-4.4
omega_866500	-8.86625	-12.7171	0.357299	4.27865	3.24646	-1.83424	-2.1973	4	CL2653	DC	5	1	Y020-2035	5	2-ethyl-5-phenyl-6-propyl[1,2,4]triazolo[1,5-a]pyrimidin-7(4H)-one	59.81	O=C1C(CCC)=C(c2ccccc2)Nc2n1nc(CC)n2	5	1.53196	4.09	-2.50902
omega_1010644	-8.86583	-11.5179	0.516313	5.70835	2.58043	-3.49677	-2.65621	7	CM3760	IC	5	0	S690-2311	5	4-{[1-(cyclopropylcarbonyl)-4-piperidyl]methyl}-N-methyl-N-[2-(2-pyridyl)ethyl]benzamide	53.51	O=C(N(CCc1ncccc1)C)c1ccc(CC2CCN(C(=O)C3CC3)CC2)cc1	119	1.31	1.32	-2.82
omega_506626	-8.86577	-12.0399	0.266311	4.37305	3.06654	-2.60474	-1.92704	4		DC	6	3	6143-0123	6	5-amino-3-[(4-bromobenzyl)sulfanyl][1,2,4]triazolo[4,3-a]pyrimidin-7-ol	114.63	Brc1ccc(CSc2n3C(N)=CC(O)=Nc3nn2)cc1	26	0.46	2.97	-4.38
omega_284967	-8.86554	-10.0033	0.544417	4.02026	5.15062	-5.47767	-3.09984	6	CL6481	DC	6	1	G205-1018	8	N-[2-(2-furyl)ethyl]-5-oxo-2-pyrrolidin-1-yl-5H-[1,3,4]thiadiazolo[3,2-a]pyrimidine-6-carboxamide	115.81	O=C(NCCc1occc1)C=1C(=O)N2N=C(N3CCCC3)SC2=NC=1	120	2.6	1.31	-3.77
omega_375635	-8.86544	-12.1856	0.447027	4.6317	1.89818	-1.87152	-1.78524	5		DC	4	2	1741-0976	4	4-(tert-butyl)-N'-[(E)-1-(2-hydroxy-3,5-diiodophenyl)methylidene]benzohydrazide	61.69	Ic1c(O)c(/C=N/NC(=O)c2ccc(C(C)(C)C)cc2)cc(I)c1	3	5.87	7.04	-7.13
omega_599076	-8.8653	-11.5809	0.394258	4.10015	1.89322	-1.67946	-1.99261	3		DC	5	2	8015-4245	5	3-hydroxy-N'~2~-(3-oxocyclohexyliden)-2-naphthohydrazide	78.76	O=C(N/N=C\1/CC(=O)CCC/1)c1c(O)cc2c(c1)cccc2	31	1.75	1.78	-3.22
omega_661670	-8.86528	-10.9265	0.739836	4.58568	3.42795	-4.57489	-2.11734	4	CL2007	DC	5	1	C243-0288	5	N-(4-fluorobenzyl)-9-methyl-4-oxo-4H-pyrido[1,2-a]thieno[2,3-d]pyrimidine-2-carboxamide	90.01	Fc1ccc(CNC(=O)c2sc3N=C4C(C)=CC=CN4C(=O)c3c2)cc1	9	0.99	3.05	-2.57
omega_943254	-8.86524	-10.5538	0.402927	3.50996	3.09051	-2.97817	-2.33664	4		DC	5	3	8017-8274	5	5-[(2-hydroxy-3,5-diiodobenzyl)amino]-1H-pyrazol-4-yl cyanide	84.73	Ic1c(O)c(CNc2c(C#N)cn[nH]2)cc(I)c1	31	3.15	3.36	-4.87
omega_21583	-8.86457	-12.9053	0.459089	4.69804	4.46597	-2.7105	-2.87187	7	CL3525	DC	7	2	C716-0537	7	2-({5-[(3-chlorophenyl)sulfonyl]-6-oxo-1,6-dihydropyrimidin-2-yl}thio)-N-mesitylacetamide	138.38	Clc1cc([SH0](=O)OC=2C(=O)NC(SCC(=O)Nc3c(C)cc(C)cc3C)=NC=2)ccc1	75	2.71	4.02	-4.77
omega_743606	-8.86436	-14.511	0.701636	7.05792	4.79451	-4.76909	-2.13833	6	CL1009	DC	5	1	K280-0115	6	N-(4-methylbenzyl)-2-[(2-methyl[1,2,4]triazolo[1,5-c]quinazolin-5-yl)thio]acetamide	72.17	S(CC(=O)NCc1ccc(C)cc1)C=1n2nc(C)nc2-c2c(N=1)cccc2	4	3.51	3.74	-4.73
omega_391607	-8.86392	-8.71362	0.332927	3.70198	4.48892	-4.34949	-4.32463	4	CL1367	DC	4	3	2238-0046	6	N-(4-hydroxy-2-methylphenyl)-1H-1,2,4-triazole-3-carboxamide	90.9	O=C(Nc1c(C)cc(O)cc1)c1n[nH]cn1	2	-0.67	0.7	0.48
omega_87215	-8.86384	-12.55	0.541697	5.6562	4.09473	-3.91676	-2.68973	4	CL7372	DC	3	2	D351-0481	6	2-(3-methylphenyl)-5-{[(2-methylphenyl)amino]methyl}[1,2,4]triazolo[1,5-a]pyrimidin-7(4H)-one	71.84	O=C1n2nc(-c3cc(C)ccc3)nc2NC(CNc2c(C)cccc2)=C1	147	1.63	3.32	-2.12
omega_873412	-8.86334	-10.0986	0.498694	3.25337	4.02029	-3.01259	-3.52447	4		DC	5	4	Y021-1137	5	2-[5-(2-aminophenyl)-1H-1,2,4-triazol-3-yl]phenol	87.82	Oc1c(-c2nc(-c3c(N)cccc3)[nH]n2)cccc1	46	2.57	2.7	-3.73
omega_1500105	-8.86316	-10.8935	0.503087	3.69361	3.7927	-3.47008	-2.48895	5	CM0615	NC	3	3	P574-0888	6	2-(2-amino-4-methyl-6-oxopyrimidin-1(6H)-yl)-N-(4-ethylphenyl)acetamide	87.79	O=C(Nc1ccc(CC)cc1)CN1C(N)=NC(C)=CC1=O	95	2.431	1.759	0.6
omega_106918	-8.86316	-12.6947	0.658779	5.30907	4.72289	-4.6596	-2.19962	5	CL6729A	DC	5	1	D458-0356	6	N-(3-chlorophenyl)-2-[5,7-dimethyl-2-(3-methylphenyl)[1,2,4]triazolo[1,5-a]pyrimidin-6-yl]acetamide	72.18	Clc1cc(NC(=O)CC2=C(C)n3nc(-c4cc(C)ccc4)nc3N=C2C)ccc1	216	3.85	4.4	-7.19
omega_749109	-8.86253	-14.15	0.32511	5.2263	3.89107	-1.99321	-2.16175	5	CL0638	DC	3	2	K288-0080	5	N-(4-methylbenzyl)-2-(4-oxo-2-thioxo-1,4-dihydroquinazolin-3(2H)-yl)acetamide	93.53	S=C1N(CC(=O)NCc2ccc(C)cc2)C(=O)c2c(N1)cccc2	3	1.43	2.99	-1.98
omega_671366	-8.8625	-9.66668	0.705966	4.07841	6.47109	-6.3545	-4.0968	3	CL2892	DC	3	3	C301-1157	7	2-oxo-N-(pyridin-3-ylmethyl)-2,3-dihydro-1H-benzimidazole-5-sulfonamide	108.57	[SH0]([O+H]c1cc2NC(=O)Nc2cc1)([O-])=NCc1cnccc1	33	-0.55	0.55	-1.55
omega_90460	-8.86208	-11.7551	0.608706	4.79152	3.67382	-3.74267	-2.43835	3	CL2813A	DC	4	1	D358-0040	5	N-(2,6-dimethylphenyl)-5-oxo-5H-[1,3]thiazolo[3,2-a]pyrimidine-6-carboxamide	87.07	O=C(Nc1c(C)cccc1C)C=1C(=O)N2C(SC=C2)=NC=1	185	1.8	1.6	-1.88
omega_252115	-8.86201	-12.2963	0.705514	5.07959	3.07012	-3.19339	-2.2275	3	CL7852	DC	5	1	F692-0287	5	N-(3-chloro-2-methylphenyl)-7,8-dimethyl-4-oxo-4H-[1,3]thiazino[3,2-a]benzimidazole-2-carboxamide	89.29	Clc1c(C)c(NC(=O)C=2Sc3n(C(=O)C=2)c2c(n3)cc(C)c(C)c2)ccc1	23	3.82	5.28	-4.85
omega_103388	-8.86176	-11.8683	0.60333	4.75804	4.29237	-3.94751	-2.69966	4	CL8250	DC	4	2	D433-1585	6	6-(4-chlorobenzyl)-2-{[(2-ethylphenyl)amino]methyl}-5-methyl[1,2,4]triazolo[1,5-a]pyrimidin-7(4H)-one	71.84	Clc1ccc(CC=2C(=O)n3nc(CNc4c(CC)cccc4)nc3NC=2C)cc1	99	3.47	4.54	-4.48
omega_376321	-8.86175	-10.7787	0.486719	4.39797	4.49711	-4.87912	-2.58576	7		DC	3	2	1761-1531	5	2-anilino-N'-[(E)-1-(3-pyridyl)methylidene]butanohydrazide	66.38	O=C(NN=Cc1cnccc1)C(Nc1ccccc1)CC	24	2.12	1.92	-1.79
omega_1464607	-8.86147	-11.4112	0.550673	3.92457	4.80549	-4.08885	-2.64218	2	CL7308	NC	1	3	M503-1180	6	4-amino-N~5~-benzyl-2-(1,4-thiazinan-4-yl)-5-pyrimidinecarboxamide	109.44	O=C(NCc1ccccc1)c1c(N)nc(N2CCSCC2)nc1	113	1.06643	0.831	-1.7239
omega_87114	-8.86129	-12.4129	0.532846	5.45166	4.07322	-3.86725	-2.63887	5	CL7372	DC	5	2	D351-0195	7	5-{[(4-fluorophenyl)amino]methyl}-2-(4-methoxyphenyl)[1,2,4]triazolo[1,5-a]pyrimidin-7(4H)-one	81.07	Fc1ccc(NCC=2Nc3n(C(=O)C=2)nc(-c2ccc(OC)cc2)n3)cc1	144	1.79	2.53	-2.66
omega_1359226	-8.86065	-11.4467	0.463996	4.60262	2.82488	-2.18109	-3.12436	6		NC	3	2	K786-0839	4	2-[(benzylamino)carbonyl]benzoic acid	66.4	O=C(O)c1c(C(=O)NCc2ccccc2)cccc1	137	-0.82	2.23	-0.35
omega_61985	-8.86048	-13.0042	0.401035	4.53716	5.50325	-2.4931	-3.80462	6	CL5013	DC	6	2	D205-0210	8	N-(7-hydroxy-5-methyl[1,2,4]triazolo[1,5-a]pyrimidin-2-yl)-2-phenoxypropanamide	101.64	O=C(Nc1nn2C(O)=CC(C)=Nc2n1)C(Oc1ccccc1)C	5	-0.06	2.42	-1
omega_951123	-8.85933	-12.0019	0.596424	5.28028	3.18211	-3.73624	-2.18001	5	CL5886	DC	6	0	G020-0137	6	2-ethyl-6-(4-methoxybenzyl)-5-(methylsulfanyl)-2,6-dihydro-7H-pyrazolo[4,3-d]pyrimidin-7-one	85.02	S(C)C=1N(Cc2ccc(OC)cc2)C(=O)c2nn(CC)cc2N=1	1	2	2	-3.84
omega_177069	-8.85883	-12.9889	0.528749	5.77566	2.25606	-2.38257	-2.04781	4	CL1509	DC	5	2	E869-0200	6	4-chloro-2-[(1-ethyl[1,2,4]triazolo[4,3-a]quinoxalin-4-yl)amino]phenol	75.34	Clc1cc(NC2=Nc3c(-n4c(CC)nnc24)cccc3)c(O)cc1	74	3.29	4.61	-1.23
omega_1390071	-8.85806	-13.7375	0.617782	4.80303	3.99581	-2.46986	-2.06735	7	CL8833	NC	7	1	L391-0022	10	N-(3-chlorophenyl)-N'-[2-(1H-indol-2-yl)phenyl]urea	117.09	O=C(Nc1c(C(=O)OC)cccc1)CN1C(=O)c2c(nc(N3CCCC3)nc2)N=C1	107	0.18	0.68	-0.27
omega_1080128	-8.85755	-10.6952	0.510382	3.97187	2.77734	-3.01296	-2.40895	6	CM4373A	IC	5	2	T151-0365	5	N-[2-(1-cyclobutyl-5-methyl-1H-imidazol-2-yl)ethyl]-N'-isobutylurea	58.95	O=C(NCC(C)C)NCCc1n(c(C)cn1)C1CCC1	51	1.1	1.77	-6.06
omega_472423	-8.85752	-12.8049	0.304963	5.0489	2.84107	-3.31357	-0.933988	4	CL3092	DC	4	2	4534-3553	5	N'-(2-naphthoyloxy)pyridine-2-carboximidamide	65.21	O(N=C(N)c1ncccc1)C(=O)c1cc2c(cc1)cccc2	61	3.13	3.1	-2.61
omega_514670	-8.85744	-10.6795	0.419328	4.58669	3.89456	-4.44085	-2.6377	5	CL2120	DC	7	3	6456-0116	7	N-(4-methylphenyl)-6-{[(5-methyl-1,3,4-thiadiazol-2-yl)thio]methyl}-1,3,5-triazine-2,4-diamine	102.5	S(Cc1nc(Nc2ccc(C)cc2)nc(N)n1)c1sc(C)nn1	68	0.83	3.49	-1.31
omega_14971	-8.85731	-14.094	0.535221	5.90104	3.20645	-2.52605	-1.87996	6	CL3446	DC	6	0	C679-2952	5	7-[(2-allylphenoxy)methyl]-2-thien-2-yl-5H-[1,3,4]thiadiazolo[3,2-a]pyrimidin-5-one	107.8	O(CC=1N=C2SC(c3sccc3)=NN2C(=O)C=1)c1c(CC=C)cccc1	127	3.18	4.59	-4.22
omega_258554	-8.85684	-13.586	0.669188	4.54938	4.13859	-2.55568	-2.07235	8	CL8394	DC	7	1	F801-0418	9	ethyl 2-{[(7-oxo-2-pyrrolidin-1-yl[1,3]thiazolo[4,5-d]pyrimidin-6(7H)-yl)acetyl]amino}benzoate	132.44	O=C(Nc1c(C(=O)OCC)cccc1)CN1C(=O)c2sc(N3CCCC3)nc2N=C1	75	0.69	1.9	0.31
omega_1333662	-8.85661	-12.4812	0.624001	5.22324	3.49057	-3.52217	-2.1911	6	CL5379	NC	4	1	G786-2129	5	N-(4-methylphenyl)-2-[(2-phenylimidazo[1,2-b]pyridazin-6-yl)thio]acetamide	84.59	S(CC(=O)Nc1ccc(C)cc1)C1=Nn2c(nc(-c3ccccc3)c2)C=C1	77	4.72	4.51	-5.93
omega_648926	-8.8555	-12.6917	0.616604	4.65276	3.50989	-2.59227	-2.35076	6	CL3584	DC	6	1	C200-2606	9	methyl 2-{[(1-methyl-4-oxo-1,4-dihydro-5H-pyrazolo[3,4-d]pyrimidin-5-yl)acetyl]amino}benzoate	105.89	O=C(Nc1c(C(=O)OC)cccc1)CN1C(=O)c2c(n(C)nc2)N=C1	8	-0.17	-0.45	2.55
omega_685315	-8.85532	-13.5658	0.68901	5.1068	4.66318	-2.69048	-3.058	8	CL2560	DC	5	2	C385-0678	8	N-(2-cyanoethyl)-6-{[(3,5-dimethylphenyl)amino]sulfonyl}-N-methyl-4-oxo-1,4-dihydroquinoline-3-carboxamide	119.37	[S+]([O+H2])(=O)(Nc1cc(C)cc(C)c1)c1cc2C(=O)C(C(=O)N(CCC#N)C)=CNc2cc1	1	3.2	1.75	-4.2
omega_596230	-8.85506	-12.6708	0.268634	4.33328	3.47051	-2.44286	-1.81385	1		DC	5	2	8015-0612	5	2-methyl-5-oxo-4-(2-pyridylamino)-4-(trifluoromethyl)-4,5-dihydro-1H-pyrrol-3-yl cyanide	77.81	FC(F)(F)C1(Nc2ncccc2)C(C#N)=C(C)NC1=O	61	2.23	2.24	-4.28
omega_22706	-8.85502	-9.62178	0.652211	3.41553	4.94797	-4.73153	-3.51742	7	CV0299	DC	5	2	C720-0679	7	N-[3-(dimethylamino)propyl]-2-hydroxy-4-oxo-4H-pyrido[1,2-a]pyrimidine-3-carboxamide	85.24	O=C(NCCCN(C)C)C=1C(=O)N2C(=NC=1O)C=CC=C2	14	-1.5	-0.56	1.63
omega_87088	-8.85439	-11.8854	0.611814	5.0955	3.99935	-3.86846	-2.80724	2	CL7372	DC	4	2	D351-0145	6	5-{[(5-chloro-2-methylphenyl)amino]methyl}-2-(4-methylphenyl)[1,2,4]triazolo[1,5-a]pyrimidin-7(4H)-one	71.84	Clc1cc(NCC=2Nc3n(C(=O)C=2)nc(-c2ccc(C)cc2)n3)c(C)cc1	146	3.87	3.98	-4.05
omega_56589	-8.85439	-10.2905	0.899973	4.59392	4.44499	-4.66569	-3.83705	8	CL5254	DC	7	3	D133-0035	7	ethyl 4-amino-2-({2-[(4-bromo-2-methylphenyl)amino]-2-oxoethyl}thio)pyrimidine-5-carboxylate	132.5	Brc1cc(C)c(NC(=O)CSc2nc(N)c(C(=O)OCC)cn2)cc1	213	3.59	2.98	-3.34
omega_373332	-8.85427	-12.3986	0.359746	5.41084	3.89533	-3.4539	-2.66764	5		DC	2	2	1683-1318	4	1H-Benzoimidazole-5-carboxylic acid phenethyl-amide	57.78	O=C(NCCc1ccccc1)c1cc2nc[nH]c2cc1	15	1.72	2.46	-1.82
omega_538957	-8.85419	-11.5718	0.182272	3.75107	2.73625	-1.76246	-2.18954	7		DC	6	2	8003-8339	5	N'~1~-[(E)-1-(5-bromo-2-hydroxyphenyl)methylidene]-2-(3-bromophenoxy)acetohydrazide	70.92	Brc1cc(C=NNC(=O)COc2cc(Br)ccc2)c(O)cc1	33	3.1	3.75	-5.3
omega_685282	-8.85416	-13.8501	0.731011	4.91044	4.77492	-2.65142	-2.76899	9	CL2560	DC	5	2	C385-0410	8	6-{[(4-ethoxyphenyl)amino]sulfonyl}-N,N-diethyl-4-oxo-1,4-dihydroquinoline-3-carboxamide	104.81	[S+]([O+H2])(=O)(Nc1ccc(OCC)cc1)c1cc2C(=O)C(C(=O)N(CC)CC)=CNc2cc1	77	5.73	1.83	-4.55
omega_87082	-8.85395	-13.234	0.578936	5.37224	4.5613	-3.65079	-2.4816	3	CL7372	DC	5	2	D351-0138	7	5-{[(5-chloro-2-methoxyphenyl)amino]methyl}-2-(4-methylphenyl)[1,2,4]triazolo[1,5-a]pyrimidin-7(4H)-one	81.07	Clc1cc(NCC=2Nc3n(C(=O)C=2)nc(-c2ccc(C)cc2)n3)c(OC)cc1	182	2.33	3.48	-1.44
omega_392895	-8.85365	-12.2745	0.436609	5.77923	3.34353	-2.47906	-3.65942	8		DC	5	3	2262-4123	6	2-chloro-N-[3-({(2E)-2-[(2-hydroxy-1-naphthyl)methylene]hydrazino}carbonyl)phenyl]benzamide	90.79	Clc1c(C(=O)Nc2cc(C(=O)NN=Cc3c(O)ccc4c3cccc4)ccc2)cccc1	84	4.96	4.77	-3.26
omega_269645	-8.85354	-14.8337	0.681706	6.48603	5.79517	-3.92981	-3.05298	8	CL8437	DC	6	2	F898-0808	9	N~2~-methyl-N~2~-({5-[(4-methylpiperidin-1-yl)carbonyl]-1H-pyrrol-3-yl}sulfonyl)-N~1~-(6-methylpyridin-2-yl)glycinamide	123.85	[SH0](=O)(ON(CC(=O)Nc1nc(C)ccc1)C)c1cc(C(=O)N2CCC(C)CC2)[nH]c1	4	-0.42	0.67	-1.68
omega_467227	-8.85315	-14.3064	0.632512	5.62416	3.97575	-1.47373	-3.30544	8		DC	7	3	4440-0593	7	4-{[(3-cyano-4,5,6,7-tetrahydro-1-benzothien-2-yl)amino]carbonyl}isophthalic acid	127.49	O=C(O)c1c(C(=O)Nc2c(C#N)c3c(s2)CCCC3)ccc(C(=O)O)c1	14	-2.83	3.06	3.49
omega_1337306	-8.85307	-10.4231	0.614406	3.66824	3.1504	-4.34008	-1.52294	4	CL2717	NC	5	1	G822-0809	4	7-chloro-N-(4-chlorobenzyl)furo[2,3-b]quinoline-2-carboxamide	55.13	Clc1cc2nc3oc(C(=O)NCc4ccc(Cl)cc4)cc3cc2cc1	173	5.99	4.79	-6.84
omega_1500298	-8.85304	-10.4165	0.41743	3.6591	4.3254	-4.25874	-2.57974	4	CM0615A	NC	6	3	P574-3092	6	2-[2-amino-4-ethyl-6-oxo-1(6H)-pyrimidinyl]-N-cyclopentylacetamide	87.79	O=C(NC1CCCC1)CN1C(N)=NC(CC)=CC1=O	5	1.41	1.41	-2.95
omega_802181	-8.85294	-14.7207	0.50191	6.39853	0.899576	-1.05223	-0.880018	10	CL9580	DC	3	0	V001-4453	3	1-(5-benzyl-1,3,4,5-tetrahydro-2H-pyrido[4,3-b]indol-2-yl)-1-decanone	25.24	O=C(CCCCCCCCC)N1Cc2c3c(n(Cc4ccccc4)c2CC1)cccc3	3	8.06	8.06	-6.81
omega_87139	-8.85228	-13.3229	0.611045	5.60034	4.79661	-3.69672	-2.84069	6	CL7372	DC	5	2	D351-0303	7	2-(4-tert-butylphenyl)-5-{[(5-chloro-2-methoxyphenyl)amino]methyl}[1,2,4]triazolo[1,5-a]pyrimidin-7(4H)-one	81.07	Clc1cc(NCC=2Nc3n(C(=O)C=2)nc(-c2ccc(C(C)(C)C)cc2)n3)c(OC)cc1	194	4.03	4.39	-3.98
omega_575868	-8.85194	-10.3014	0.621265	3.77176	4.88265	-4.93598	-2.89025	6		DC	6	2	8011-6476	6	N~5~-(3,4-dimethoxyphenethyl)-1H-pyrazole-5-carboxamide	76.24	O=C(NCCc1cc(OC)c(OC)cc1)c1[nH]ncc1	33	1.46126	0.65	-2.7202
omega_252127	-8.85147	-12.2603	0.700953	4.98229	2.97503	-2.94956	-2.29985	3	CL7852	DC	5	1	F692-0350	5	N-(4-bromo-2-methylphenyl)-7,8-dimethyl-4-oxo-4H-[1,3]thiazino[3,2-a]benzimidazole-2-carboxamide	89.29	Brc1cc(C)c(NC(=O)C=2Sc3n(C(=O)C=2)c2c(n3)cc(C)c(C)c2)cc1	98	4.13	5.37	-3.8
omega_1372836	-8.85142	-12.3405	0.345554	4.09876	2.91281	-2.59188	-1.27617	4	CL8526	NC	6	1	L228-0030	5	N-(3-chlorophenyl)-5-(2-methyl-1,3-oxazol-5-yl)-2-thiophenesulfonamide	108.82	Clc1cc(N=[SH0]([O+H]c2sc(-c3oc(C)nc3)cc2)[O-])ccc1	190	3.62	3.21	-4.45
omega_523164	-8.85131	-9.74227	0.659561	3.70684	5.58888	-4.98328	-4.08105	4	CL2892	DC	5	3	7202-2330	7	2-Oxo-2,3-dihydro-1H-benzoimidazole-5-sulfonic acid (furan-2-ylmethyl)-amide	108.82	[SH0]([O+H]c1cc2NC(=O)Nc2cc1)([O-])=NCc1occc1	1	0.5	-0.19	-3.19
omega_1330619	-8.85099	-13.1893	0.461682	4.96497	4.32858	-2.95324	-2.46371	7	CL2674	NC	5	2	G731-0430	5	N-(2-ethyl-6-methylphenyl)-2-{[5-(4-fluorophenyl)-4H-1,2,4-triazol-3-yl]thio}acetamide	95.97	S(CC(=O)Nc1c(CC)cccc1C)c1[nH]c(-c2ccc(F)cc2)nn1	55	4.13	4.47	-5.03
omega_1500106	-8.85082	-11.997	0.436941	4.4788	4.10552	-3.37837	-2.49674	4	CM0615	NC	3	3	P574-0890	6	2-(2-amino-4-methyl-6-oxopyrimidin-1(6H)-yl)-N-(2,3-dimethylphenyl)acetamide	87.79	O=C(Nc1c(C)c(C)ccc1)CN1C(N)=NC(C)=CC1=O	141	1.488	1.789	0.18
omega_41616	-8.85002	-13.8055	0.49946	6.26533	4.26827	-4.45368	-1.62389	6	CL4403A	DC	5	1	C999-0239	7	N-(1,3-benzodioxol-5-ylmethyl)-2-(5,7-dimethyl-2-phenylpyrazolo[1,5-a]pyrimidin-6-yl)acetamide	77.75	O=C(NCc1cc2OCOc2cc1)CC1=C(C)n2nc(-c3ccccc3)cc2N=C1C	87	5.54	3.47	-2.84
omega_1412286	-8.84899	-12.0606	0.422346	4.56502	3.89818	-3.97509	-1.69884	0	CL1346	NC	0	4	L656-0085	5	N-(2,3-dimethylphenyl)-4-{[3-(3,5-dimethylphenyl)-3H-imidazo[4,5-b]pyridin-2-yl]methyl}piperazine-1-carboxamide	55.63	N(c1ncnc(-n2c(C)cc(C)n2)c1)c1cc(C)cc(C)c1	5	3.47	2.85	-4.07
omega_446572	-8.84864	-11.5391	0.426153	3.63854	4.19047	-2.15179	-3.41287	5		DC	6	2	3924-0010	6	4-Hydroxy-3-methoxy-N-(4-oxo-2-thioxo-thiazolidin-3-yl)-benzamide	110.96	S=C1N(NC(=O)c2cc(OC)c(O)cc2)C(=O)CS1	36	-1.01	1.7	-0.14
omega_348908	-8.84859	-12.9451	0.549585	4.93914	3.21878	-2.57748	-2.03351	3	CL4945D	DC	2	2	G851-0180	4	N-(4-methylphenyl)-6,7,8,9,10,11-hexahydro-5H-cycloocta[b]indole-2-sulfonamide	70.34	[SH0](=O)(ONc1ccc(C)cc1)c1cc2c([nH]c3c2CCCCCC3)cc1	97	5.8	5.39	-8.11
omega_1455219	-8.84858	-9.08642	0.388575	4.20739	3.87432	-5.4644	-2.76803	4	CL9523	NC	4	2	M265-0844	4	N-isopentyl-1H-pyrrolo[2,3-c]pyridine-2-carboxamide	57.78	O=C(NCCC(C)C)c1[nH]c2c(c1)ccnc2	2	3.31	3.37	-2.43
omega_539186	-8.84852	-11.6163	0.275184	4.14686	3.17737	-2.27234	-2.55932	6		DC	4	2	8003-8760	5	2-{2-[(E)-1-(3-iodophenyl)methylidene]hydrazino}-N~1~-(2-methylphenyl)-2-oxoacetamide	70.56	Ic1cc(C=NNC(=O)C(=O)Nc2c(C)cccc2)ccc1	17	2.94	3.01	-2.65
omega_90454	-8.84764	-9.82658	0.573433	3.56123	3.97893	-4.73703	-2.39763	4	CL2813A	DC	5	1	D358-0032	6	5-oxo-N-(pyridin-3-ylmethyl)-5H-[1,3]thiazolo[3,2-a]pyrimidine-6-carboxamide	99.96	O=C(NCc1cnccc1)C=1C(=O)N2C(SC=C2)=NC=1	157	0.31	-0.52	-2.27
omega_800761	-8.84723	-11.4549	0.486878	3.94782	3.69162	-2.83152	-2.68709	4	CL0448	DC	5	1	8017-1150	5	2-[4-oxo-3(4H)-quinazolinyl]-N~1~-(1-phenylethyl)acetamide	61.77	O=C(NC(C)c1ccccc1)CN1C(=O)c2c(N=C1)cccc2	31	3.42	3.42	-4.56
omega_953177	-8.84712	-13.8882	0.604616	5.9204	4.06759	-3.41203	-2.1395	4		DC	7	1	Y042-7098	7	3-(2,3-dihydro-1-benzofuran-5-yl)-N~1~-(3-methyl-4-oxo-3,4-dihydro-1,2,3-benzotriazin-6-yl)propanamide	83.36	O=C(Nc1cc2C(=O)N(C)N=Nc2cc1)CCc1cc2c(OCC2)cc1	30	2.27	2.27	-4.63
omega_1500126	-8.8462	-10.9786	0.420511	3.93732	3.96873	-3.50069	-2.69352	4	CM0615	NC	4	3	P574-0957	6	2-[2-amino-4-methyl-6-oxo-1(6H)-pyrimidinyl]-N~1~-(4-fluoro-2-methylphenyl)acetamide	87.79	Fc1cc(C)c(NC(=O)CN2C(N)=NC(C)=CC2=O)cc1	152	1.396	1.508	-0.08
omega_41609	-8.84566	-13.0621	0.594317	5.82261	3.89756	-4.26751	-1.83058	2	CL4403A	DC	4	1	C999-0232	5	2-(5,7-dimethyl-2-phenylpyrazolo[1,5-a]pyrimidin-6-yl)-N-(4-fluorophenyl)acetamide	59.29	Fc1ccc(NC(=O)CC2=C(C)n3nc(-c4ccccc4)cc3N=C2C)cc1	25	4.63	3.9	-4.54
omega_1500222	-8.84531	-12.6505	0.564018	4.48297	4.48631	-3.28764	-2.44051	7	CM0615	NC	5	3	P574-1386	8	2-(2-amino-4-ethyl-6-oxopyrimidin-1(6H)-yl)-N-(3,5-dimethoxyphenyl)acetamide	106.25	O=C(Nc1cc(OC)cc(OC)c1)CN1C(N)=NC(CC)=CC1=O	150	1.529	1.308	1.63
omega_544946	-8.84517	-12.8283	0.452939	5.42466	2.44497	-1.83182	-2.50758	7		DC	3	3	8005-0744	5	N'~1~-[(E)-1-(2-hydroxy-1-naphthyl)methylidene]-2-(2-naphthylamino)acetohydrazide	73.72	O=C(NN=Cc1c(O)ccc2c1cccc2)CNc1cc2c(cc1)cccc2	40	4.57	3.62	-5.39
omega_393398	-8.84491	-13.139	0.435632	5.45797	1.80579	-1.64732	-1.75797	3		DC	3	1	2275-0228	3	5-(4-chlorophenyl)-N~2~-(1,2-dihydro-5-acenaphthylenyl)-2-furamide	42.24	Clc1ccc(-c2oc(C(=O)Nc3c4c5c(cc3)CCc5ccc4)cc2)cc1	6	7.4623	5.95	-7.0601
omega_350848	-8.84452	-10.8547	0.510429	4.20256	2.18581	-0.990441	-3.89821	4	CL1133A	DC	3	2	0091-0213	5	2-{[(4-hydroxyphenyl)amino]methyl}-1H-isoindole-1,3(2H)-dione	69.64	O=C1N(CNc2ccc(O)cc2)C(=O)c2c1cccc2	5	0.51	2.28	-1.19
omega_56577	-8.84433	-10.7256	0.777297	4.46648	4.43381	-4.06022	-3.7361	8	CL5254	DC	7	3	D133-0023	7	ethyl 4-amino-2-({2-[(2-bromophenyl)amino]-2-oxoethyl}thio)pyrimidine-5-carboxylate	132.5	Brc1c(NC(=O)CSc2nc(N)c(C(=O)OCC)cn2)cccc1	224	2.06	2.5	-4.15
omega_558856	-8.84425	-11.1221	0.256723	4.05877	2.58753	-3.164	-1.46115	3		DC	2	1	8008-1201	3	N~3~-(3,5-dimethylphenyl)nicotinamide	41.99	O=C(Nc1cc(C)cc(C)c1)c1cnccc1	19	3.13	2.44	-2.78
omega_243171	-8.84345	-14.4803	0.494883	6.14119	5.28927	-4.16953	-2.11894	8	CL8043	DC	4	2	F550-1987	7	1-[3-(cyclooctylamino)-3-oxopropyl]-6-oxo-N-phenyl-1,6-dihydropyridazine-3-carboxamide	90.87	O=C(NC1CCCCCCC1)CCN1C(=O)C=CC(C(=O)Nc2ccccc2)=N1	107	1.82	2.64	-1.97
omega_1464648	-8.84286	-11.2708	0.564312	4.05	4.57045	-4.08386	-2.67298	3	CL7308	NC	1	3	M503-1471	6	4-amino-N~5~-(2-fluorobenzyl)-2-(1-pyrrolidinyl)-5-pyrimidinecarboxamide	84.14	Fc1c(CNC(=O)c2c(N)nc(N3CCCC3)nc2)cccc1	80	1.62934	1.312	-1.51062
omega_372809	-8.84261	-12.6739	0.240318	4.25395	5.02225	-2.55775	-3.12746	5		DC	7	3	1682-3378	7	benzyl 2-[(5-oxo-3-thioxo-2,3,4,5-tetrahydro-1,2,4-triazin-6-yl)amino]acetate	123.91	S=C1NC(=O)C(NCC(=O)OCc2ccccc2)=NN1	2	0.19	1.42	-3.42
omega_542312	-8.84236	-11.2866	0.446632	3.79085	3.34342	-2.90291	-2.23371	7		DC	4	2	8004-4647	5	2-bromo-N~1~-(2-{2-[(E)-1-(4-methylphenyl)methylidene]hydrazino}-2-oxoethyl)benzamide	70.56	Brc1c(C(=O)NCC(=O)NN=Cc2ccc(C)cc2)cccc1	16	2.59	2.98	-2.46
omega_47018	-8.84214	-11.3887	0.482053	4.29461	3.8397	-3.93029	-2.13946	2	CL5012	DC	3	2	D043-0096	6	6-benzyl-2-(benzylamino)-5-methyl[1,2,4]triazolo[1,5-a]pyrimidin-7(4H)-one	71.84	O=C1C(Cc2ccccc2)=C(C)Nc2n1nc(NCc1ccccc1)n2	56	0.62	3.57	1.1
omega_1300104	-8.8417	-12.706	0.455398	4.809	4.17766	-4.16807	-1.40964	2	CL8429	NC	3	1	F937-1444	4	N-benzyl-4-methyl-2-(4-methylphenyl)pyrimidine-5-carboxamide	54.88	O=C(NCc1ccccc1)c1c(C)nc(-c2ccc(C)cc2)nc1	10	3.5	3.23	-3.29
omega_240329	-8.841	-12.2012	0.560994	5.39635	4.70263	-4.45908	-2.84069	5	CL7886	DC	5	1	F527-0281	6	2-methyl-N-{[2-(4-methylphenyl)-5-oxo-5H-[1,3,4]thiadiazolo[3,2-a]pyrimidin-7-yl]methyl}benzamide	99.43	O=C(NCC=1N=C2SC(c3ccc(C)cc3)=NN2C(=O)C=1)c1c(C)cccc1	25	1.61	4.05	-3.62
omega_1500243	-8.84032	-11.7235	0.549507	4.07007	3.85421	-3.10942	-2.48122	5	CM0615	NC	3	3	P574-2290	6	2-[2-amino-4-ethyl-5-methyl-6-oxo-1(6H)-pyrimidinyl]-N-(3-methylphenyl)acetamide	87.79	O=C(Nc1cc(C)ccc1)CN1C(=O)C(C)=C(CC)N=C1N	83	2.91	2.38	0.02
omega_22631	-8.83969	-9.60276	0.62143	3.60515	4.65483	-4.4423	-3.67604	6	CV0299	DC	5	2	C720-0582	7	2-hydroxy-N-(2-methoxy-1-methylethyl)-8-methyl-4-oxo-4H-pyrido[1,2-a]pyrimidine-3-carboxamide	91.23	O=C(NC(COC)C)C=1C(=O)N2C(=NC=1O)C=C(C)C=C2	94	-1.1	-0.07	-0.44
omega_379736	-8.83965	-12.6897	0.385117	4.77718	2.61889	-0.8503	-3.08083	5		DC	4	2	1910-7121	4	2-{[(3-chloro-2-methylphenyl)amino]carbonyl}benzoic acid	66.4	Clc1c(C)c(NC(=O)c2c(C(=O)O)cccc2)ccc1	2	0.92	3.37	-1.88
omega_354668	-8.83964	-11.9335	0.488123	4.55977	2.14673	-1.35301	-2.74773	3	CL1133A	DC	4	1	0466-0293	7	5-Nitro-2-(o-tolylamino-methyl)-isoindole-1,3-dione	95.23	O=[N+]([O-])c1cc2C(=O)N(CNc3c(C)cccc3)C(=O)c2cc1	13	1.57	2.93	-4.46
omega_859408	-8.83944	-12.2878	0.458514	5.75391	3.59358	-3.341	-3.01668	4	CL1721	DC	4	2	8017-2123	4	N~2~-[2-(1H-1,3-benzimidazol-2-yl)ethyl]-3-chloro-1-benzothiophene-2-carboxamide	86.02	Clc1c(C(=O)NCCc2[nH]c3c(n2)cccc3)sc2c1cccc2	31	3.42	3.45	-4.24
omega_874897	-8.83916	-11.4853	0.305031	4.36339	2.55258	-3.06414	-1.51069	1		DC	3	1	Y030-0123	3	N-(2,4-dimethylphenyl)nicotinamide	41.99	O=C(Nc1c(C)cc(C)cc1)c1cnccc1	60	2.79	2.79	-3.45
omega_363332	-8.83887	-13.8697	0.614221	6.66537	2.37873	-1.29269	-3.33483	5		DC	5	1	1171-0249	6	3-(1,3-dioxo-5-phenoxy-1,3-dihydro-2H-isoindol-2-yl)benzoic acid	83.91	O=C(O)c1cc(N2C(=O)c3c(C2=O)ccc(Oc2ccccc2)c3)ccc1	88	-0.01	4.22	0.21
omega_284856	-8.83882	-10.6938	0.583719	4.65521	4.39869	-4.81749	-2.9652	4	CL6481	DC	6	1	G205-0619	8	N-(3,4-dimethylphenyl)-2-morpholin-4-yl-5-oxo-5H-[1,3,4]thiadiazolo[3,2-a]pyrimidine-6-carboxamide	111.9	O=C(Nc1cc(C)c(C)cc1)C=1C(=O)N2N=C(N3CCOCC3)SC2=NC=1	15	0.99	2.63	-2.83
omega_1474619	-8.8385	-13.2149	0.440545	5.32075	3.17849	-2.57533	-1.9881	5	CL6310	NC	4	2	M830-6405	4	N-(2,5-dimethylphenyl)-2-[(3-fluorophenyl)amino]-4-methyl-1,3-thiazole-5-carboxamide	82.26	Fc1cc(Nc2sc(C(=O)Nc3c(C)ccc(C)c3)c(C)n2)ccc1	76	3.369	5.244	-4.26
omega_716	-8.83751	-12.7938	0.454492	6.06971	3.69886	-4.5917	-1.67505	9	CL4403A	DC	3	1	C561-2147	5	2-(5,7-dimethyl-2-phenylpyrazolo[1,5-a]pyrimidin-6-yl)-N-hexylacetamide	59.29	O=C(NCCCCCC)CC1=C(C)n2nc(-c3ccccc3)cc2N=C1C	200	5.85	4.36	-4.76
omega_576549	-8.83751	-12.5319	0.358172	4.93968	2.60136	-2.09184	-2.11294	0		DC	4	1	8011-7952	6	8-methyl-2-nitrodibenzo[b,f][1,4]oxazepin-11(10H)-one	84.15	O=[N+]([O-])c1cc2C(=O)Nc3c(Oc2cc1)ccc(C)c3	32	2.88	2.73	-5.29
omega_87194	-8.83743	-12.1414	0.612503	5.42641	4.18088	-4.00556	-2.91029	5	CL7372	DC	3	2	D351-0457	6	5-{[(4-ethylphenyl)amino]methyl}-2-(3-methylphenyl)[1,2,4]triazolo[1,5-a]pyrimidin-7(4H)-one	71.84	O=C1n2nc(-c3cc(C)ccc3)nc2NC(CNc2ccc(CC)cc2)=C1	137	1.97	3.77	-2.21
omega_917741	-8.83662	-12.4028	0.37036	4.68654	4.38476	-3.29379	-2.58168	3		DC	7	2	Y043-3427	7	3-(2-methoxyphenyl)-N-(1-methyl-1H-pyrazol-3-yl)-1H-pyrazole-5-carboxamide	84.83	O=C(Nc1nn(C)cc1)c1[nH]nc(-c2c(OC)cccc2)c1	30	1.21	1.22	-4.61
omega_66489	-8.83642	-12.9843	0.60017	4.70339	3.04023	-2.04759	-2.14832	6	CL4742	DC	6	0	D243-0307	6	ethyl 3-[(4-oxo-6-phenylthieno[2,3-d][1,2,3]triazin-3(4H)-yl)methyl]benzoate	99.57	O=C(OCC)c1cc(CN2C(=O)c3c(sc(-c4ccccc4)c3)N=N2)ccc1	173	4.53	5.4	-4.22
omega_472492	-8.83598	-9.31434	0.34492	4.8262	2.97796	-4.12417	-3.54655	7		DC	4	2	4539-0012	5	3-Phenyl-propionic acid (8-hydroxy-quinolin-2-ylmethylene)-hydrazide	74.58	O=C(NN=Cc1nc2c(O)cccc2cc1)CCc1ccccc1	60	2.2	4.08	-1.72
omega_865856	-8.83579	-11.8838	0.580849	4.52348	5.42521	-4.45459	-3.02693	2	CL2120	DC	6	3	Y020-1323	6	N-[4-amino-6-(1-benzofuran-2-yl)-1,3,5-triazin-2-yl]-N-(2,3-dimethylphenyl)amine	89.86	N(c1nc(N)nc(-c2oc3c(c2)cccc3)n1)c1c(C)c(C)ccc1	28	4.8666	4.66	-3.09916
omega_22626	-8.8351	-10.6371	0.652376	3.88999	4.4203	-4.01782	-3.14285	8	CV0299	DC	5	2	C720-0577	7	2-hydroxy-N-(3-isopropoxypropyl)-8-methyl-4-oxo-4H-pyrido[1,2-a]pyrimidine-3-carboxamide	91.23	O=C(NCCCOC(C)C)C=1C(=O)N2C(=NC=1O)C=C(C)C=C2	66	-0.2	0.34	-1.51
omega_458625	-8.83458	-9.60122	0.655521	4.30727	6.19145	-5.19486	-5.19275	8	CL2887	DC	3	4	4269-1861	6	N-{[(2-oxo-2,3-dihydro-1H-benzimidazol-5-yl)amino]carbonothioyl}hexanamide	114.35	S=C(NC(=O)CCCCC)Nc1cc2NC(=O)Nc2cc1	66	2.2	2.72	-2
omega_510077	-8.83445	-11.936	0.234961	3.68438	2.09697	-1.74682	-1.16797	3		DC	4	1	6228-1574	4	1-Ethyl-1H-pyrazole-3-carboxylic acid (2,3-dimethyl-phenyl)-amide	46.92	O=C(Nc1c(C)c(C)ccc1)c1nn(CC)cc1	19	2.04	2.66	-3.54
omega_612222	-8.83437	-10.3286	0.532769	4.19456	5.29846	-3.9829	-4.54867	6		DC	8	2	8018-5837	8	N-[4,5-dimethoxy-2-(1H-1,2,3,4-tetraazol-5-yl)phenyl]-N-(4-pyridylmethyl)amine	97.84	O(C)c1c(OC)cc(-c2[nH]nnn2)c(NCc2ccncc2)c1	48	0.92002	0.37	-1.07278
omega_732460	-8.83372	-13.3438	0.589923	5.98034	3.04266	-1.44021	-3.66264	5		DC	5	4	K007-0558	5	5-{1-[(Z)-2-(2,3-dimethylphenyl)hydrazono]ethyl}-2-hydroxybenzamide	87.71	O=C(N)c1c(O)ccc(/C(=N/Nc2c(C)c(C)ccc2)/C)c1	5	4.1116	3.84	-3.668
omega_443774	-8.83349	-10.157	0.548872	4.09821	3.88583	-4.04352	-3.16587	4		DC	5	2	3807-2058	5	5-[(5-hydroxy-3-pyridyl)methyl]-2-methyl-1-benzenesulfonic acid	95.87	S(=O)(=O)(O)c1c(C)ccc(Cc2cc(O)cnc2)c1	1	-4.09	-0.57	-0.33
omega_1505193	-8.83337	-10.2045	0.653913	4.8877	5.36395	-4.75959	-4.77485	5	CL8338	NC	5	2	P666-0069	8	N-(4-ethoxyphenyl)-1-oxo-1,2-dihydropyrrolo[1,2-d][1,2,4]triazine-7-sulfonamide	110.17	S(=O)(=O)(Nc1ccc(OCC)cc1)c1cn2c(C(=O)NN=C2)c1	31	1.474	-0.018	-2.51
omega_626928	-8.83314	-11.2965	0.5088	4.2962	3.74003	-3.98601	-2.09563	3	CL2653	DC	4	1	8525-0605	5	6-(4-chlorobenzyl)-2-ethyl-5-methyl[1,2,4]triazolo[1,5-a]pyrimidin-7(4H)-one	59.81	Clc1ccc(CC=2C(=O)n3nc(CC)nc3NC=2C)cc1	46	1.86	3.22	-1.48
omega_103378	-8.832	-12.1209	0.666232	4.91933	4.44564	-3.99891	-2.74342	4	CL8250	DC	5	2	D433-1567	7	6-(4-chlorobenzyl)-2-{[(2-methoxyphenyl)amino]methyl}-5-methyl[1,2,4]triazolo[1,5-a]pyrimidin-7(4H)-one	81.07	Clc1ccc(CC=2C(=O)n3nc(CNc4c(OC)cccc4)nc3NC=2C)cc1	202	2.74	3.59	-3.25
omega_799218	-8.83179	-10.1455	0.399425	4.3531	3.239	-4.16006	-2.51777	3		DC	8	2	8016-8666	8	6-methyl-1-{(Z)-1-[3-(3-nitrophenyl)-1H-pyrazol-4-yl]methylidene}-4-thioxo-4,5-dihydrofuro[3,4-c]pyridin-3-one	144.92	S=C1NC(C)=CC=2/C(=C/c3c(-c4cc([N+](=O)[O-])ccc4)n[nH]c3)/OC(=O)C1=2	30	2.58	2.59	-5.4
omega_539238	-8.83088	-11.4976	0.20413	4.14181	2.67101	-1.97277	-2.3775	7		DC	7	2	8003-8854	5	2-(3-chlorophenoxy)-N'~1~-[(E)-1-(3,5-dibromo-2-hydroxyphenyl)methylidene]acetohydrazide	70.92	Brc1c(O)c(/C=N/NC(=O)COc2cc(Cl)ccc2)cc(Br)c1	31	1.82	4.41	-1.23
omega_87197	-8.83069	-13.0686	0.514515	5.44074	4.81068	-3.66067	-2.86734	5	CL7372	DC	4	2	D351-0460	7	5-{[(2-methoxyphenyl)amino]methyl}-2-(3-methylphenyl)[1,2,4]triazolo[1,5-a]pyrimidin-7(4H)-one	81.07	O(C)c1c(NCC=2Nc3n(C(=O)C=2)nc(-c2cc(C)ccc2)n3)cccc1	170	1.58	2.81	-2.91
omega_781350	-8.83048	-11.3716	0.522015	3.8535	3.19756	-2.95256	-2.07942	4	CL2277	DC	5	1	K905-0028	5	N-(2-fluorophenyl)-2-(6-methyl-4-oxothieno[2,3-d]pyrimidin-3(4H)-yl)acetamide	61.77	Fc1c(NC(=O)CN2C(=O)c3c(sc(C)c3)N=C2)cccc1	1	1.15	1.24	-1.81
omega_41599	-8.82976	-12.9514	0.592226	5.87343	3.67119	-4.55569	-1.45947	6	CL4403A	DC	4	1	C999-0220	5	N-(3-chlorobenzyl)-2-(5,7-dimethyl-2-phenylpyrazolo[1,5-a]pyrimidin-6-yl)acetamide	59.29	Clc1cc(CNC(=O)CC2=C(C)n3nc(-c4ccccc4)cc3N=C2C)ccc1	281	5.88	4.37	-7.16
omega_1266496	-8.82974	-11.5142	0.389717	3.81799	2.98049	-2.54572	-1.95798	4	CL7457	NC	4	3	F091-0320	4	[4-amino-2-(3-toluidino)-1,3-thiazol-5-yl](phenyl)methanone	96.25	O=C(c1c(N)nc(Nc2cc(C)ccc2)s1)c1ccccc1	4	3.18	3.18	-4.52
omega_1393942	-8.82966	-12.4172	0.442308	5.01208	2.59894	-2.9376	-1.52822	4	CL8573	NC	3	1	L454-0477	3	5-(4,5-dimethyl-1,3-thiazol-2-yl)-2-methyl-N-(3-phenylpropyl)thiophene-3-sulfonamide	41.99	Fc1cc(-c2ncc(C(=O)Nc3c(C)cccc3)cc2)ccc1	38	4.31	4.1	-4.86
omega_34755	-8.82964	-12.4645	0.446841	5.5263	2.69914	-3.52775	-1.50968	4	CL4011	DC	4	1	C859-0082	4	N-benzyl-4-methyl-2-(1H-pyrrol-1-yl)-1,3-thiazole-5-carboxamide	75.16	O=C(NCc1ccccc1)c1c(C)nc(-n2cccc2)s1	3	2.21	2.21	0.0512
omega_986839	-8.82874	-9.76091	0.251204	3.34696	4.3431	-4.00227	-3.00683	3	CM3849	IC	6	3	S515-0110	6	N-[(3,5-dimethyl-1H-pyrazol-4-yl)methyl]-7-oxoazepane-2-carboxamide	86.88	O=C(NCc1c(C)[nH]nc1C)C1NC(=O)CCCC1	29	1.78457	0.36	0.5896
omega_1211121	-8.8287	-14.6654	0.46412	4.98115	3.63882	-1.32425	-1.92315	4		NC	2	3	7388-0038	5	N-(4-methylphenyl)-2-(3-oxo-1,2,3,4-tetrahydronaphtho[1,8-ef][1,4]diazepin-2-yl)acetamide	70.23	O=C(Nc1ccc(C)cc1)CC1C(=O)Nc2c3c(ccc2)cccc3N1	28	2.21	2.58	-1.4
omega_630148	-8.82813	-12.7894	0.711649	5.83714	4.56084	-3.52826	-3.62011	7	CL2607	DC	3	2	A0060914	5	3-allyl-N-(2-cyclohex-1-en-1-ylethyl)-4-oxo-2-thioxo-1,2,3,4-tetrahydroquinazoline-7-carboxamide	93.53	S=C1N(CC=C)C(=O)c2c(N1)cc(C(=O)NCCC1=CCCCC1)cc2	3	3	4.02	-1.3
omega_1487619	-8.82677	-10.2956	0.55336	4.86176	4.02951	-5.07517	-2.90061	5	CM0489	NC	2	2	P168-0011	4	N-[2-(1-cyclohexenyl)ethyl]-1H-pyrrolo[2,3-b]pyridine-3-carboxamide	57.78	O=C(NCCC1=CCCCC1)c1c2c([nH]c1)nccc2	38	3.162	2.013	-3.72
omega_579798	-8.82648	-13.6352	0.359463	5.28447	1.42829	-0.870201	-1.39327	2	CL3104	DC	3	1	8012-4455	3	2,4-dichloro-N~1~-(8-quinolyl)benzamide	41.99	Clc1c(C(=O)Nc2c3ncccc3ccc2)ccc(Cl)c1	22	5.32	5.32	-6.35
omega_942570	-8.82501	-12.4159	0.371128	4.96493	2.31508	-2.66338	-1.39682	2		DC	4	1	8017-7021	4	1,5-dimethyl-N~4~-[3-(trifluoromethyl)phenyl]-1H-pyrazole-4-carboxamide	46.92	FC(F)(F)c1cc(NC(=O)c2c(C)n(C)nc2)ccc1	31	1.33	1.33	-3.9
omega_905798	-8.82483	-12.4565	0.37768	5.54953	2.85639	-3.70464	-1.44729	4		DC	4	1	Y040-9948	4	2-(1H-indol-1-yl)-N-(4-pyridinylmethyl)acetamide	46.92	O=C(NCc1ccncc1)Cn1c2c(cc1)cccc2	10	-3.48	2.72	2.13676
omega_1505202	-8.82475	-9.43263	0.519257	4.32675	4.60325	-5.05014	-3.79124	4	CL8338	NC	7	2	P666-0127	7	N-(2,4-difluorobenzyl)-1-oxo-1,2-dihydropyrrolo[1,2-d][1,2,4]triazine-7-sulfonamide	100.94	S(=O)(=O)(NCc1c(F)cc(F)cc1)c1cn2c(C(=O)NN=C2)c1	10	1.763	0.068	-1.99
omega_564580	-8.82458	-12.9205	0.273009	4.75153	2.58721	-2.31206	-1.20381	3		DC	4	1	8009-1104	3	2-chloro-N~3~-(3-fluorophenyl)-4,6-dimethylnicotinamide	41.99	Clc1c(C(=O)Nc2cc(F)ccc2)c(C)cc(C)n1	46	4.14	3.31	-5.41
omega_47041	-8.82402	-12.0057	0.450315	4.9143	3.70604	-3.76213	-2.12685	3	CL2653	DC	4	1	D043-0120	5	6-benzyl-2-(4-chlorophenyl)-5-methyl[1,2,4]triazolo[1,5-a]pyrimidin-7(4H)-one	59.81	Clc1ccc(-c2nn3C(=O)C(Cc4ccccc4)=C(C)Nc3n2)cc1	91	2.3	4.22	-4.18
omega_912040	-8.82377	-13.5654	0.726766	6.95306	3.6227	-3.4509	-3.10999	4		DC	5	2	Y041-7923	5	N-[2-(4-chloro-1H-indol-1-yl)ethyl]-1-oxo-1,2-dihydro-4-isoquinolinecarboxamide	63.13	Clc1c2c(n(CCNC(=O)C=3c4c(C(=O)NC=3)cccc4)cc2)ccc1	11	5.03	5.03	-6.38
omega_757294	-8.82364	-11.5031	0.514827	4.60497	1.97397	-2.17426	-2.24008	5	CL1097	DC	6	0	K685-0039	5	ethyl 3-(3-bromobenzyl)-5-methyl-4-oxo-3,4-dihydrothieno[2,3-d]pyrimidine-6-carboxylate	87.21	Brc1cc(CN2C(=O)c3c(C)c(C(=O)OCC)sc3N=C2)ccc1	2	2.9	3.57	-2.15
omega_1431641	-8.8235	-11.3717	0.867979	4.05678	5.69508	-4.44814	-3.62347	8	CL9020	NC	3	3	L879-0263	6	N-(sec-butyl)-3-[2-{2-[(2-chlorophenyl)amino]-2-oxoethyl}-1,5-dioxo-1,2-dihydro[1,2,4]triazolo[4,3-a]quinazolin-4(5H)-yl]propanamide	86.88	O=C(Nc1[nH]c2c(n1)cccc2)C(NC(=O)c1c(C)cc(C)cc1)CCC	1	2.46	4.17	-1.48
omega_779834	-8.8229	-12.7291	0.345471	4.6957	2.78084	-1.17822	-2.73763	6	CL1604	DC	6	3	K844-1084	6	6-hydroxy-N-(3-hydroxypropyl)-4-oxo-1,2-dihydro-4H-pyrrolo[3,2,1-ij]quinoline-5-carboxamide	89.87	O=C(NCCCO)C=1C(=O)N2c3c(C=1O)cccc3CC2	2	-1.89	0.91	-2.41
omega_1431653	-8.82278	-10.9974	0.792037	3.735	5.69465	-4.46621	-3.5809	8	CL9020	NC	4	3	L879-0277	6	N-(3-fluorophenyl)-2-[2-oxo-7-(pyrrolidin-1-ylsulfonyl)-2,3,4,5-tetrahydro-1H-1-benzazepin-1-yl]acetamide	86.88	Clc1ccc(C(=O)NC(C(=O)Nc2[nH]c3c(n2)cccc3)CCC)cc1	126	2.33	3.86	-2.81
omega_355416	-8.82275	-13.0943	0.49888	4.9734	4.98583	-3.48923	-2.69734	3		DC	6	2	0568-0761	10	5-nitro-2-[2-(5-nitro-1H-benzimidazol-2-yl)ethyl]-1H-benzimidazole	149	O=[N+]([O-])c1cc2nc(CCc3[nH]c4c(n3)cc([N+](=O)[O-])cc4)[nH]c2cc1	67	1.39	3.05	-3.93
omega_983522	-8.8225	-10.8603	0.430792	4.07949	3.99967	-3.53423	-2.93797	3	CM2582	IC	5	3	S451-0341	5	N-(4-fluorophenyl)-3-(1H-pyrrol-2-yl)-1H-pyrazole-5-carboxamide	73.57	Fc1ccc(NC(=O)c2[nH]nc(-c3[nH]ccc3)c2)cc1	75	3.4333	2.23	-3.1771
omega_538862	-8.82231	-12.1377	0.254965	4.60733	1.80326	-1.85389	-1.49624	5		DC	5	2	8003-8169	7	3-hydroxy-N'~2~-[(E)-1-(4-nitrophenyl)methylidene]-2-naphthohydrazide	107.51	O=[N+]([O-])c1ccc(C=NNC(=O)c2c(O)cc3c(c2)cccc3)cc1	30	3.21	3.22	-4.32
omega_124451	-8.82231	-13.0935	0.351756	4.82383	5.22528	-3.11365	-3.01603	4	CM0132	DC	7	3	D668-0262	7	N-(2,3-dichlorophenyl)-2-hydroxy-4-methyl-6-oxo-1,6-dihydropyrimidine-5-sulfonamide	116.24	Clc1c(Cl)cccc1NS(=O)(=O)C1=C(C)N=C(O)NC1=O	138	1.45	1.336	-0.52
omega_1389586	-8.82177	-13.3091	0.648257	5.71593	3.20916	-3.10126	-1.98473	3	CL4819	NC	4	0	L388-0111	6	2-{3-[4-(2-methyl-1,3-thiazol-4-yl)phenyl]-1,2,4-oxadiazol-5-yl}pyrazine	66.12	O=C(CN1C(=O)c2oc3c(c2N=C1)cccc3)N1Cc2c(cccc2)CC1	90	2.11	1.8	-2.75
omega_1341288	-8.82156	-12.2464	0.702275	5.5888	5.0756	-5.15127	-2.79059	3	CL2482A	NC	5	1	G881-0067	6	N-(4-methylbenzyl)-2-(4-oxopyrido[3',2':4,5]thieno[3,2-d]pyrimidin-3(4H)-yl)acetamide	102.9	O=C(NCc1ccc(C)cc1)CN1C(=O)c2sc3ncccc3c2N=C1	85	1.56	1.78	-1.73
omega_1212209	-8.82152	-11.1408	0.504086	4.53762	3.04319	-3.58881	-2.17681	3		NC	4	1	8539-0735	5	(2-hydroxy-5-methylphenyl)[2-(4-methylphenyl)pyrazolo[1,5-a]pyrimidin-6-yl]methanone	67.49	O=C(c1c(O)ccc(C)c1)C1=Cn2nc(-c3ccc(C)cc3)cc2N=C1	60	4.54	4.55	-4.25
omega_486337	-8.82131	-13.7055	0.23909	5.38375	1.46446	-0.874743	-1.3284	2	CL1299	DC	3	1	5227-1387	3	3-[(2,5-dimethylphenyl)amino]-2-benzofuran-1(3H)-one	38.33	O=C1OC(Nc2c(C)ccc(C)c2)c2c1cccc2	61	2.68	1.83	-2.59
omega_539384	-8.82129	-10.7399	0.71623	5.05573	3.73876	-4.30239	-3.28974	9		DC	3	2	8003-9100	5	N~1~-mesityl-3-[(E)-2-pentanoylhydrazono]butanamide	70.56	O=C(Nc1c(C)cc(C)cc1C)CC(=NNC(=O)CCCC)C	1	1.69	3.36	-0.42
omega_113300	-8.82127	-11.6454	0.585771	5.17346	4.04441	-4.16462	-2.81487	4	CL7372	DC	2	4	D489-0179	6	2-(3,4-dimethylphenyl)-5-{[(2-fluorophenyl)amino]methyl}[1,2,4]triazolo[1,5-a]pyrimidin-7(4H)-one	71.84	Fc1c(NCC=2Nc3n(C(=O)C=2)nc(-c2cc(C)c(C)cc2)n3)cccc1	258	0.65	3.47	-3.06
omega_1291793	-8.82122	-13.6829	0.40969	4.97078	2.69794	-1.30522	-1.91151	3	CL8342	NC	3	2	F731-0222	5	N-(8-methyl-11-oxo-10,11-dihydrodibenzo[b,f][1,4]oxazepin-2-yl)cyclohexanecarboxamide	67.43	O=C(Nc1cc2C(=O)Nc3c(Oc2cc1)ccc(C)c3)C1CCCCC1	9	3.77	3.84	-3.86
omega_210296	-8.82118	-13.7161	0.750186	6.77126	3.88403	-3.86291	-2.64766	6	CL7676	DC	5	2	F259-0005	5	N-[2-(benzoylamino)-1,3-benzothiazol-6-yl]-2-bromobenzamide	99.33	Brc1c(C(=O)Nc2cc3sc(NC(=O)c4ccccc4)nc3cc2)cccc1	283	4.53	5.1	-5.45
omega_14935	-8.82	-12.8605	0.560529	5.51012	4.30657	-4.49284	-1.84383	4	CL3447	DC	8	0	C679-2674	6	7-[(1,3-benzothiazol-2-ylthio)methyl]-2-(2-furyl)-5H-[1,3,4]thiadiazolo[3,2-a]pyrimidin-5-one	149.9	S(CC=1N=C2SC(c3occc3)=NN2C(=O)C=1)c1sc2c(n1)cccc2	89	2.49	4.21	-4.51
omega_321718	-8.81913	-12.3557	0.548995	4.57949	2.75441	-3.74649	-0.599785	3	CL6074	DC	5	0	G607-0085	6	1-ethyl-3-(3-pyridin-2-yl-1,2,4-oxadiazol-5-yl)quinolin-4(1H)-one	72.12	O=C1C(c2onc(-c3ncccc3)n2)=CN(CC)c2c1cccc2	9	1.17	2.47	-6.42
omega_122477	-8.81907	-12.8639	0.496811	4.87547	2.25691	-2.38519	-1.19915	4	CL8272	DC	4	1	D633-0149	6	N-1-naphthyl-4-(1H-tetrazol-1-yl)benzamide	72.7	O=C(Nc1c2c(ccc1)cccc2)c1ccc(-n2nnnc2)cc1	156	3.58	2.759	-3.81
omega_284990	-8.81884	-10.0308	0.637561	4.55407	4.635	-5.41308	-3.20153	6	CL6481	DC	5	1	G205-1138	7	2-azepan-1-yl-5-oxo-N-(2-phenylethyl)-5H-[1,3,4]thiadiazolo[3,2-a]pyrimidine-6-carboxamide	102.67	O=C(NCCc1ccccc1)C=1C(=O)N2N=C(N3CCCCCC3)SC2=NC=1	101	3.26	3.67	-3.6
omega_314188	-8.81874	-12.0529	0.534248	4.41293	2.36664	-2.38813	-1.69148	5	CL6616	DC	4	1	G511-0543	5	5-bromo-N-(1-propionyl-1,2,3,4-tetrahydroquinolin-7-yl)-2-furamide	62.55	Brc1oc(C(=O)Nc2cc3N(C(=O)CC)CCCc3cc2)cc1	101	3.07	3.1	-1.57
omega_713406	-8.81871	-10.8339	0.688011	5.33858	5.06712	-5.91959	-3.15889	4	CL2482A	DC	5	1	G881-0083	6	N-(sec-butyl)-2-[4-oxopyrido[3',2':4,5]thieno[3,2-d]pyrimidin-3(4H)-yl]acetamide	102.9	O=C(NC(CC)C)CN1C(=O)c2sc3ncccc3c2N=C1	52	-0.31	0.96	-1.5
omega_1427550	-8.81771	-12.6977	0.732387	5.98704	4.94084	-5.03268	-2.74765	4	CL4296	NC	6	1	L858-1505	6	8-[(1-{[4-(5-cyclopropyl-1,2,4-oxadiazol-3-yl)-2-thienyl]sulfonyl}piperidin-4-yl)carbonyl]-1,4-dioxa-8-azaspiro[4.5]decane	102.9	Clc1c(CNC(=O)CN2C(=O)c3sc4nc(-c5ccccc5)ccc4c3N=C2)cccc1	125	3.86	3.91	-5.22
omega_865891	-8.81684	-11.7485	0.657858	4.4579	5.44336	-4.53209	-3.09535	2	CL2120	DC	6	3	Y020-1364	6	N-[4-amino-6-(3-methyl-1-benzofuran-2-yl)-1,3,5-triazin-2-yl]-N-(2,3-dichlorophenyl)amine	89.86	Clc1c(Cl)cccc1Nc1nc(N)nc(-c2c(C)c3c(o2)cccc3)n1	25	4.1495	5.39	-5.3365
omega_952773	-8.81676	-8.9933	0.932625	3.6369	5.99808	-6.67221	-3.71885	4		DC	6	3	Y042-6588	6	N~5~-[(1S)-1-(1H-1,3-benzimidazol-2-yl)ethyl]-3-(2-thienyl)-1H-pyrazole-5-carboxamide	114.7	O=C(N[C@@H](C)c1[nH]c2c(n1)cccc2)c1[nH]nc(-c2sccc2)c1	30	4.24	4.25	-4.93
omega_983524	-8.81628	-10.8894	0.4567	4.1576	3.94984	-3.57891	-2.91207	3	CM2582	IC	5	3	S451-0348	5	N-(4-chlorophenyl)-3-(1H-pyrrol-2-yl)-1H-pyrazole-5-carboxamide	73.57	Clc1ccc(NC(=O)c2[nH]nc(-c3[nH]ccc3)c2)cc1	77	3.7494	2.32	-3.04261
omega_124360	-8.81623	-9.02405	0.387745	3.51432	5.26076	-5.18128	-3.77373	4	CM0132	DC	7	3	D668-0073	7	N-(4-bromo-2-fluorophenyl)-2-hydroxy-6-oxo-1,6-dihydropyrimidine-5-sulfonamide	116.24	Brc1cc(F)c(NS(=O)(=O)C=2C(=O)NC(O)=NC=2)cc1	162	0.21	0.447	-1.73
omega_376342	-8.8161	-10.9819	0.346903	4.31445	2.85286	-3.06522	-2.28315	7		DC	4	2	1761-1584	4	2-(4-bromoanilino)-N'-[(E)-1-(2-thienyl)methylidene]butanohydrazide	53.49	Brc1ccc(NC(C(=O)NN=Cc2sccc2)CC)cc1	136	3.99	4.11	-3.18
omega_908632	-8.81583	-10.0219	0.427375	3.56629	4.02602	-4.6221	-2.19146	3		DC	6	1	Y041-3541	6	N-(2-furylmethyl)-7-methylpyrazolo[1,5-a]pyrimidine-6-carboxamide	72.43	O=C(NCc1occc1)C1=C(C)n2nccc2N=C1	30	-0.53	-0.53	-2.01
omega_1455220	-8.81551	-9.24443	0.352885	4.1638	4.02307	-5.0703	-3.04054	3	CL9523	NC	2	2	M265-0890	4	N-cyclohexyl-1H-pyrrolo[2,3-c]pyridine-2-carboxamide	57.78	O=C(NC1CCCCC1)c1[nH]c2c(c1)ccnc2	1	1.868	2.331	0.41
omega_1026661	-8.81513	-11.8666	0.338228	5.08608	3.08662	-2.65837	-2.80113	4	CM4272	IC	6	1	S824-3293	6	[(3S,4R)-3-(methoxymethyl)-4-(4-pyridyl)tetrahydro-1H-pyrrol-1-yl](1H-pyrazol-3-yl)methanone	71.11	O=C(N1C[C@@H](COC)[C@H](c2ccncc2)C1)c1n[nH]cc1	28	0.04	0.05	-1.98
omega_124432	-8.81505	-13.0193	0.303103	4.33846	5.19719	-2.8106	-2.82389	4	CM0132	DC	5	3	D668-0235	7	2-hydroxy-4-methyl-N-(3-methylphenyl)-6-oxo-1,6-dihydropyrimidine-5-sulfonamide	116.24	S(=O)(=O)(Nc1cc(C)ccc1)C1=C(C)N=C(O)NC1=O	175	0.67	0.493	-0.42
omega_341766	-8.81501	-11.7696	0.479852	5.30528	4.8751	-4.09651	-3.60912	4	CL5923	DC	5	2	G786-2268	5	3,3-dimethyl-N-[(4-oxo-3,4-dihydro-1-phthalazinyl)methyl]butanamide	70.56	O=C(NCC1=NNC(=O)c2c1cccc2)CC(C)(C)C	1	1.5	1.5	-2.88
omega_672697	-8.81466	-13.1154	0.496503	5.34362	3.56334	-3.12295	-1.97973	2	CL4837	DC	6	1	C301-3831	6	N-(3-chloro-2-methylphenyl)-7-methyl-5-oxo-5H-[1,3]thiazolo[3,2-a]pyrimidine-6-sulfonamide	112.52	Clc1c(C)c(NS(=O)(=O)C=2C(=O)N3C(SC=C3)=NC=2C)ccc1	3	-0.18	1.74	0.0262
omega_1431649	-8.81416	-12.1772	0.614279	4.52365	5.89213	-4.52653	-3.14048	11	CL9020	NC	4	3	L879-0273	7	N-ethyl-6-(4-{[(4-methoxyphenyl)sulfonyl]amino}phenoxy)nicotinamide	96.11	O=C(Nc1[nH]c2c(n1)cccc2)C(NC(=O)CCc1cc(OC)ccc1)CCC	3	2.11	3.67	-2.46
omega_627465	-8.81401	-12.8505	0.352086	5.07417	2.53859	-2.67702	-1.25134	5	CL2436	DC	5	2	8563-0325	5	2-[(4-hydroxy-6-methylpyrimidin-2-yl)thio]-1-(2-methyl-1H-indol-3-yl)ethanone	104.17	S(CC(=O)c1c(C)[nH]c2c1cccc2)c1nc(O)cc(C)n1	119	0.54	3.36	0.78
omega_536268	-8.81339	-11.2353	0.299386	4.12634	2.88979	-2.01045	-2.88314	5		DC	6	2	8003-2775	6	N'~6~-[(E)-1-(5-chloro-2-hydroxyphenyl)methylidene]-2,3-dihydro-1,4-benzodioxine-6-carbohydrazide	80.15	Clc1cc(C=NNC(=O)c2cc3OCCOc3cc2)c(O)cc1	27	3.03	2.87	-2.92
omega_1498030	-8.81332	-11.0122	0.48307	4.004	4.73582	-5.8655	-1.15848	4	CM0601	NC	7	0	P507-2154	7	2-{3-[1-(3-fluorobenzyl)-5-methyl-1H-1,2,3-triazol-4-yl]-1,2,4-oxadiazol-5-yl}pyridine	82.52	Fc1cc(Cn2c(C)c(-c3nc(-c4ncccc4)on3)nn2)ccc1	49	1.904	2.969	-3.5
omega_796189	-8.81324	-12.8864	0.250414	4.86919	2.50398	-2.37785	-1.17255	2		DC	5	1	8016-5922	5	N~4~-(5-fluoro-2-methylphenyl)-1,3-dimethyl-1H-pyrazole-4-sulfonamide	72.37	S(=O)(=O)(Nc1c(C)ccc(F)c1)c1c(C)nn(C)c1	31	0.0936	0.41	-3.63
omega_1004660	-8.81276	-8.70112	0.28529	3.28147	3.69899	-3.97521	-3.40219	1	CM4193	IC	7	1	S636-0498	7	7-(methylsulfonyl)-2,5,6,7,8,9-hexahydro-3H-[1,2,4]triazolo[4,3-d][1,4]diazepin-3-one	90.46	S(=O)(=O)(C)N1CCN2C(=O)NN=C2CC1	77	-1.17	-1.13	-1.74
omega_137437	-8.81276	-11.6645	0.331562	3.57002	3.54442	-2.21565	-2.37857	3	CL4356	DC	4	3	E138-2200	5	2-amino-5-bromo-N-(3-methylphenyl)pyridine-3-sulfonamide	93.46	Brc1cc([O+H][SH0]([O-])=Nc2cc(C)ccc2)c(N)nc1	37	2.22	2.19	-4.65
omega_113234	-8.81256	-12.8202	0.600867	5.31341	4.61733	-3.88662	-2.63732	5	CL7372	DC	3	4	D489-0096	7	5-{[(5-chloro-2-methoxyphenyl)amino]methyl}-2-(4-fluorophenyl)[1,2,4]triazolo[1,5-a]pyrimidin-7(4H)-one	81.07	Clc1cc(NCC=2Nc3n(C(=O)C=2)nc(-c2ccc(F)cc2)n3)c(OC)cc1	71	2.32	3.42	-1.59
omega_685262	-8.8107	-13.2019	0.768476	4.79849	4.47447	-2.77077	-2.87945	7	CL2560	DC	5	2	C385-0376	7	N,N-diethyl-6-{[(2-fluorophenyl)amino]sulfonyl}-4-oxo-1,4-dihydroquinoline-3-carboxamide	95.58	[S+]([O+H2])(=O)(Nc1c(F)cccc1)c1cc2C(=O)C(C(=O)N(CC)CC)=CNc2cc1	1	2.96	1.7	-4.68
omega_1026402	-8.81062	-11.0895	0.506592	5.40845	3.20877	-3.92322	-2.92171	4	CM4272	IC	6	1	S824-0016	6	[(3S,4R)-3-(methoxymethyl)-4-(4-pyridyl)tetrahydro-1H-pyrrol-1-yl](3-methyl-1H-pyrazol-4-yl)methanone	71.11	O=C(N1C[C@@H](COC)[C@H](c2ccncc2)C1)c1c(C)n[nH]c1	19	-0.21	-0.2	-2.04
omega_335248	-8.8101	-9.79495	0.345091	3.24491	4.79723	-3.8117	-3.59068	3	CL7215	DC	5	2	G751-2184	5	6-fluoro-2-{[(5-methyl-4H-1,2,4-triazol-3-yl)thio]methyl}quinolin-4(1H)-one	95.97	S(CC=1Nc2c(C(=O)C=1)cc(F)cc2)c1[nH]c(C)nn1	17	0.52	1.56	-3.54
omega_1289503	-8.80999	-11.4154	0.78357	4.69211	3.28258	-3.91481	-2.23809	3	CL7852	NC	5	1	F692-0064	5	4-oxo-N-(1-phenylethyl)-4H-[1,3]thiazino[3,2-a][1,3]benzimidazole-2-carboxamide	89.29	O=C(NC(C)c1ccccc1)C=1Sc2n(C(=O)C=1)c1c(n2)cccc1	3	3.34	3.34	-5
omega_1528664	-8.80992	-13.4798	0.473048	5.50155	4.60491	-3.83455	-2.07508	3	CL2352A	NC	1	1	Z223-0054	7	N~1~-(4-methylbenzyl)-2-[4-(1-pyrrolidinyl)-1H-pyrazolo[3,4-d]pyrimidin-1-yl]acetamide	75.94	O=C(NCc1ccc(C)cc1)Cn1ncc2c(N3CCCC3)ncnc12	51	3.85	1.411	-3.65
omega_14987	-8.80982	-11.5588	0.572154	5.06219	4.81581	-3.96186	-3.73929	5	CL3447	DC	6	1	C679-3315	6	7-[(1H-benzimidazol-2-ylthio)methyl]-2-propyl-5H-[1,3,4]thiadiazolo[3,2-a]pyrimidin-5-one	124.31	S(CC=1N=C2SC(CCC)=NN2C(=O)C=1)c1[nH]c2c(n1)cccc2	45	3.27	3.93	-5.05
omega_952774	-8.80928	-9.25216	0.94387	3.6385	5.998	-6.20528	-3.93221	4		DC	6	3	Y042-6589	6	N~5~-[(1S)-1-(1H-1,3-benzimidazol-2-yl)ethyl]-3-phenyl-1H-pyrazole-5-carboxamide	86.46	O=C(N[C@@H](C)c1[nH]c2c(n1)cccc2)c1[nH]nc(-c2ccccc2)c1	30	4.43	4.44	-4.76
omega_714579	-8.80922	-9.70345	0.602963	3.78134	3.71415	-4.18448	-3.01975	5	CL2813A	DC	5	1	G896-0083	5	N-[2-(4-chlorophenyl)ethyl]-5-oxo-5H-[1,3]thiazolo[3,2-a]pyrimidine-6-carboxamide	87.07	Clc1ccc(CCNC(=O)C=2C(=O)N3C(SC=C3)=NC=2)cc1	43	2.87	1.62	-4.76
omega_542047	-8.80907	-12.3067	0.456474	5.265	2.84181	-2.00004	-3.06561	7		DC	5	3	8004-4292	5	N'~1~-[(E)-1-(2-hydroxy-3,5-diiodophenyl)methylidene]-2-(2-naphthylamino)acetohydrazide	73.72	Ic1c(O)c(C=NNC(=O)CNc2cc3c(cc2)cccc3)cc(I)c1	39	5.56	3.86	-2.75
omega_1474380	-8.80885	-13.5682	0.426172	5.36523	3.15025	-2.30769	-1.87464	5	CL6310	NC	3	2	M830-1904	4	N-[6-({[(3,5-dimethoxyphenyl)amino]carbonyl}amino)-1,3-benzothiazol-2-yl]methanesulfonamide	82.26	O=C(Nc1c(C)cc(C)cc1)c1c(C)nc(Nc2ccccc2)s1	3	3.373	5.039	-2.61
omega_285104	-8.80546	-9.96285	0.60663	4.32017	4.85761	-5.4542	-3.17281	6	CL6481	DC	6	1	G205-2342	8	2-(3-methylpiperidin-1-yl)-5-oxo-N-(2-piperidin-1-ylethyl)-5H-[1,3,4]thiadiazolo[3,2-a]pyrimidine-6-carboxamide	105.91	O=C(NCCN1CCCCC1)C=1C(=O)N2N=C(N3CC(C)CCC3)SC2=NC=1	33	0.7	2.69	0.11
omega_1506142	-8.80481	-10.7614	0.575347	5.08696	3.18139	-3.56189	-3.32521	3	CM0469A	NC	5	1	P681-0111	5	N-(3-methylbutyl)-2-oxo-1,2-dihydro-1'H-spiro[indole-3,3'-pyrrolidine]-1'-carboxamide	86.36	O=C(NCCC(C)C)N1CC2(C(=O)Nc3c2cccc3)CC1	3	4.11	4.19	-5.9
omega_1341291	-8.80453	-12.1275	0.70904	5.55856	5.04808	-5.30617	-2.6865	3	CL2482A	NC	5	1	G881-0073	6	N-cyclohexyl-2-(4-oxopyrido[3',2':4,5]thieno[3,2-d]pyrimidin-3(4H)-yl)acetamide	102.9	O=C(NC1CCCCC1)CN1C(=O)c2sc3ncccc3c2N=C1	28	1.75	1.57	-2.01
omega_418356	-8.80431	-8.89459	0.304997	4.22063	4.11784	-4.18169	-4.3715	5		DC	5	3	3254-0755	6	N'-[(1E)-1-(3,4-dichlorophenyl)ethylidene]-2-(5-methyl-3-oxo-2,3-dihydro-1H-pyrazol-4-yl)acetohydrazide	82.59	Clc1c(Cl)ccc(C(=NNC(=O)CC=2C(=O)NNC=2C)C)c1	12	1.72	1.79	-0.56
omega_124337	-8.80385	-12.1139	0.391908	3.69469	5.23464	-3.16783	-2.84334	4	CM0132	DC	5	3	D668-0037	7	2-hydroxy-N-(3-methylphenyl)-6-oxo-1,6-dihydropyrimidine-5-sulfonamide	116.24	S(=O)(=O)(Nc1cc(C)ccc1)C=1C(=O)NC(O)=NC=1	159	0.2	-0.021	0.71
omega_13207	-8.80369	-12.7948	0.510326	5.77823	5.23043	-3.00582	-4.52206	9	CL3393	DC	4	2	C659-0157	7	N-cyclohexyl-6-(8-methoxy-4-oxo-2-thioxo-1,2,4,5-tetrahydro-3H-pyrimido[5,4-b]indol-3-yl)-N-methylhexanamide	109.76	S=C1N(CCCCCC(=O)N(C)C2CCCCC2)C(=O)c2[nH]c3c(c2N1)cc(OC)cc3	42	1.15	5.04	-3.63
omega_1472404	-8.80368	-11.2443	0.284209	4.5191	1.75729	-2.23707	-1.8829	6	CL9905	NC	4	1	M769-0141	6	N-{2-[5-(1H-indol-2-yl)-1,2,4-oxadiazol-3-yl]ethyl}-N-methylpropanamide	75.02	O=C(N(CCc1nc(-c2[nH]c3c(c2)cccc3)on1)C)CC	96	1.09	2.247	-2.79
omega_380347	-8.80357	-12.8575	0.371757	3.80179	3.15294	-2.29164	-0.980884	3		DC	4	2	1936-2012	7	3-methyl-N'~5~-(1-methyl-2-oxo-1,2-dihydro-3H-indol-3-yliden)-1H-pyrazole-5-carbohydrazide	90.45	O=C(NN=C1C(=O)N(C)c2c1cccc2)c1[nH]nc(C)c1	46	1.85	0.99	-0.51
omega_584511	-8.80348	-11.8559	0.307963	5.02209	2.99889	-3.92864	-1.34791	4		DC	4	1	8013-0407	3	N~3~-benzyl-2,6-dichloro-4-methylnicotinamide	41.99	Clc1c(C(=O)NCc2ccccc2)c(C)cc(Cl)n1	46	2.66	3.7	-3.14
omega_124339	-8.803	-12.5846	0.437401	4.04068	5.33505	-3.26417	-2.76734	4	CM0132	DC	5	3	D668-0039	7	N-(2,3-dimethylphenyl)-2-hydroxy-6-oxo-1,6-dihydropyrimidine-5-sulfonamide	116.24	S(=O)(=O)(Nc1c(C)c(C)ccc1)C=1C(=O)NC(O)=NC=1	198	0.56	0.466	-0.55
omega_781348	-8.80199	-11.376	0.548402	3.94804	3.17917	-2.7777	-2.32389	4	CL2277	DC	6	1	K905-0022	5	N-(2,4-difluorophenyl)-2-(6-methyl-4-oxothieno[2,3-d]pyrimidin-3(4H)-yl)acetamide	61.77	Fc1c(NC(=O)CN2C(=O)c3c(sc(C)c3)N=C2)ccc(F)c1	16	1.08	1.45	-1.74
omega_685197	-8.80194	-14.0185	0.671571	4.8706	4.98892	-2.59416	-2.72038	8	CL2560	DC	5	2	C385-0062	8	N,N-diethyl-6-{[(3-methoxyphenyl)amino]sulfonyl}-4-oxo-1,4-dihydroquinoline-3-carboxamide	104.81	S(=O)([O-])(=Nc1cc(OC)ccc1)c1cc2C(=O)C(C(=O)N(CC)CC)=CNc2cc1	4	2.84	1.48	-4.25
omega_451815	-8.80114	-12.1508	0.4492	4.72663	3.34288	-2.45413	-2.71488	7		DC	5	3	4076-0129	6	N'-[(1E)-(3-ethoxy-2-hydroxyphenyl)methylene]-3-methyl-4H-1,4-benzothiazine-2-carbohydrazide	82.95	O=C(NN=Cc1c(O)c(OCC)ccc1)C1=C(C)Nc2c(S1)cccc2	5	2.16	2.79	-3.06
omega_22576	-8.80082	-8.95381	0.696372	3.62657	4.28309	-4.73047	-3.72258	6	CV0299	DC	4	2	C720-0508	6	N-butyl-2-hydroxy-9-methyl-4-oxo-4H-pyrido[1,2-a]pyrimidine-3-carboxamide	82	O=C(NCCCC)C=1C(=O)N2C(C(C)=CC=C2)=NC=1O	130	-0.11	1.12	-2.17
omega_414544	-8.80034	-9.32888	0.473943	4.17897	5.49954	-5.41664	-4.20727	3		DC	5	2	3232-1806	6	2-chlorobenzaldehyde (3-oxo-2,3-dihydro-1,2,4-triazin-5-yl)hydrazone	78.21	Clc1c(C=NNC2=NC(=O)NN=C2)cccc1	51	1.87	2.66	-1
omega_1422795	-8.79975	-9.55205	0.384691	4.22763	5.06118	-3.81767	-5.10354	8	CL7174	NC	7	4	L808-0069	9	methyl 3-({[(2,4-dihydroxy-5-pyrimidinyl)amino]carbonyl}amino)benzoate	133.67	O=C(Nc1c(O)nc(O)nc1)Nc1cc(C(=O)OC)ccc1	11	0.03	1.12	0.68
omega_978883	-8.79945	-9.47599	0.315537	3.79866	4.01441	-4.47284	-2.97922	3	CM3338	IC	6	2	S396-1043	6	2-[1-(6-oxo-1,6-dihydro-4-pyridazinyl)-3-piperidyl]acetic acid	82	O=C(O)CC1CN(C2=CC(=O)NN=C2)CCC1	435	-3.821	-0.41	1.75
omega_902014	-8.79941	-12.5794	0.553776	4.44211	4.25857	-3.43966	-2.03479	6		DC	7	2	Y040-5095	7	4-chloro-N-(2-hydroxy-2-phenylethyl)-2-(1H-1,2,3,4-tetraazol-1-yl)benzamide	92.93	Clc1cc(-n2nnnc2)c(C(=O)NCC(O)c2ccccc2)cc1	4	1.71	1.71	0.0532
omega_389755	-8.79933	-9.55766	0.552414	4.18533	3.92079	-4.45761	-3.44259	6		DC	3	2	2181-0739	5	N'-[(Z)-1-(3-pyridyl)methylidene]-2-(2-toluidino)acetohydrazide	66.38	O=C(NN=Cc1cnccc1)CNc1c(C)cccc1	140	1.91	1.4	-0.95
omega_292068	-8.79912	-13.073	0.558625	5.79083	3.99214	-3.39031	-2.67741	3	CL6693	DC	6	1	G280-0327	7	ethyl 4-[(3,5-dimethylphenyl)amino]isoxazolo[5,4-d]pyrimidine-3-carboxylate	90.14	O=C(OCC)c1noc2ncnc(Nc3cc(C)cc(C)c3)c12	414	1.24	3.46	-1.54
omega_1427695	-8.79871	-13.1509	0.749326	6.27256	5.05628	-4.83035	-2.89566	4	CL4296	NC	2	1	L858-6091	6	N-(4-{4-methoxy-3-[(4-phenyl-3,6-dihydropyridin-1(2H)-yl)sulfonyl]phenyl}-3-methylisoxazol-5-yl)acetamide	131.14	O=C(NCc1ccccc1)CN1C(=O)c2sc3nc(-c4sccc4)ccc3c2N=C1	31	2.68	2.46	-2.32
omega_1487338	-8.79837	-12.9976	0.731675	4.98548	4.16757	-2.52441	-3.16105	5	CM0213	NC	7	3	P163-0722	5	2-(1-ethyl-2,4-dioxo-7-phenyl-1,4-dihydropyrimido[4,5-d]pyrimidin-3(2H)-yl)-N-(4-methylbenzyl)acetamide	106.67	FC(F)(F)c1c(CNC(=O)C=2C(=O)Nc3c(C=2O)scc3)cccc1	46	2.042	2.109	-3.02
omega_302219	-8.79834	-13.666	0.524812	6.05804	3.58682	-3.39993	-1.90204	5	CL6985	DC	3	1	G374-0083	6	N-cycloheptyl-2-(4-oxo-2-phenyl-6,7-dihydropyrazolo[1,5-a]pyrazin-5(4H)-yl)acetamide	67.23	O=C(NC1CCCCCC1)CN1C(=O)c2n(nc(-c3ccccc3)c2)CC1	4	4.15	3.33	-4.53
omega_417705	-8.79805	-10.9435	0.32027	3.42076	4.68651	-3.57271	-2.70936	5		DC	4	4	3253-7190	6	3-(3-ethoxyphenyl)-1H-pyrazole-5-carbohydrazide	93.03	O=C(NN)c1[nH]nc(-c2cc(OCC)ccc2)c1	4	0.83	1.76	-1.59
omega_124366	-8.79688	-8.90601	0.421213	3.41897	5.77477	-5.59916	-3.90666	6	CM0132	DC	6	3	D668-0084	8	N-(4-ethoxyphenyl)-2-hydroxy-6-oxo-1,6-dihydropyrimidine-5-sulfonamide	125.47	S(=O)(=O)(Nc1ccc(OCC)cc1)C=1C(=O)NC(O)=NC=1	176	0.14	-0.174	0.14
omega_984191	-8.79577	-14.2785	0.347851	5.00827	4.02473	-3.49856	-0.399576	3	CM3807	IC	8	0	S460-0034	8	(5-chloro-2-fluorophenyl){3-[4-(3-methyl-1,2,4-oxadiazol-5-yl)-1H-1,2,3-triazol-1-yl]-1-pyrrolidinyl}methanone	89.94	Clc1cc(C(=O)N2CC(n3nnc(-c4onc(C)n4)c3)CC2)c(F)cc1	99	2.46	2.46	-4.9
omega_1080129	-8.79422	-10.5857	0.355578	3.5408	2.79066	-2.61249	-2.28307	4	CM4373A	IC	5	2	T151-0366	5	N-[2-(1-cyclobutyl-5-methyl-1H-imidazol-2-yl)ethyl]-N'-methylurea	58.95	O=C(NCCc1n(c(C)cn1)C1CCC1)NC	1	-0.27	0.4	-5.02
omega_120863	-8.79419	-12.0545	0.416274	4.31152	6.4362	-3.98573	-3.918	7	CL5279	DC	7	4	D585-0174	8	N-(3-hydroxyphenyl)-2-[(6-hydroxy-9H-purin-2-yl)thio]acetamide	149.32	S(CC(=O)Nc1cc(O)ccc1)c1nc(O)c2nc[nH]c2n1	225	-0.81	1.33	2.64
omega_106980	-8.7937	-12.9906	0.569139	5.34927	5.04866	-4.56529	-2.20484	6	CL6729A	DC	6	1	D458-0468	8	N-(3-acetylphenyl)-2-(5,7-dimethyl-2-pyridin-3-yl[1,2,4]triazolo[1,5-a]pyrimidin-6-yl)acetamide	102.14	O=C(Nc1cc(C(=O)C)ccc1)CC1=C(C)n2nc(-c3cnccc3)nc2N=C1C	193	1.92	1.83	-2.25
omega_547621	-8.79334	-14.5447	0.379761	5.7961	2.60087	-1.73849	-1.28686	5		DC	3	1	8005-5943	3	1,3-dibenzyl-2-(1H-pyrrol-2-yl)imidazolidine	22.27	C(N1C(N(Cc2ccccc2)CC1)c1[nH]ccc1)c1ccccc1	10	3.61	3.62	-3.15
omega_22694	-8.79326	-10.4693	0.631782	3.69488	5.38784	-4.55385	-3.4846	5	CV0299	DC	5	2	C720-0664	7	2-hydroxy-4-oxo-N-(pyridin-2-ylmethyl)-4H-pyrido[1,2-a]pyrimidine-3-carboxamide	94.89	O=C(NCc1ncccc1)C=1C(=O)N2C(=NC=1O)C=CC=C2	29	-1.14	-0.12	-0.48
omega_87118	-8.79316	-12.514	0.535488	5.42345	4.24763	-3.6582	-2.82754	5	CL7372	DC	5	2	D351-0200	7	5-{[(5-chloro-2-methylphenyl)amino]methyl}-2-(4-methoxyphenyl)[1,2,4]triazolo[1,5-a]pyrimidin-7(4H)-one	81.07	Clc1cc(NCC=2Nc3n(C(=O)C=2)nc(-c2ccc(OC)cc2)n3)c(C)cc1	159	2.5	3.48	-2.11
omega_356268	-8.79312	-12.009	0.442273	4.77802	1.57079	-0.825159	-2.75003	3	CL1133A	DC	3	1	0627-0042	4	5-Bromo-2-(o-tolylamino-methyl)-isoindole-1,3-dione	49.41	Brc1cc2C(=O)N(CNc3c(C)cccc3)C(=O)c2cc1	80	1.94	3.78	-2.55
omega_1513219	-8.79258	-11.3372	0.297569	3.9955	3.15607	-1.92543	-2.97912	3		NC	3	2	R052-2028	4	3-(2-naphthyl)-1H-pyrazole-5-carboxylic acid	65.98	O=C(O)c1[nH]nc(-c2cc3c(cc2)cccc3)c1	213	0	3.03	0.27
omega_103370	-8.79252	-11.9624	0.525241	5.05948	4.39316	-3.93466	-2.87332	3	CL8250	DC	3	2	D433-1537	6	5-methyl-6-(4-methylbenzyl)-2-{[(2-methylphenyl)amino]methyl}[1,2,4]triazolo[1,5-a]pyrimidin-7(4H)-one	71.84	O=C1C(Cc2ccc(C)cc2)=C(C)Nc2n1nc(CNc1c(C)cccc1)n2	187	2.74	3.91	-3.46
omega_736416	-8.79227	-14.2399	0.367481	5.65715	1.47489	-1.41013	-0.641775	3	CL1816	DC	3	1	K091-0567	4	(4E)-2-(1-naphthyl)-4-[(2-naphthylamino)methylene]-1,3-oxazol-5(4H)-one	50.69	O=C1C(=CNc2cc3c(cc2)cccc3)N=C(c2c3c(ccc2)cccc3)O1	420	4.36	4.19	-5.12
omega_492558	-8.79216	-12.8817	0.227481	4.89923	1.8064	-1.17222	-1.67138	3	CL1299	DC	4	1	5588-0130	4	3-(2-methoxyanilino)-1(3H)-isobenzofuranone	47.56	O(C)c1c(NC2OC(=O)c3c2cccc3)cccc1	5	1.52	1.52	-3.32
omega_632704	-8.792	-10.3605	0.472559	4.71356	3.82746	-3.64901	-3.79603	5	CL0962	DC	3	2	C066-0250	5	N-butyl-4-oxo-3,4-dihydrophthalazine-1-carboxamide	70.56	O=C(NCCCC)C1=NNC(=O)c2c1cccc2	63	1.08	1.52	0.2
omega_207779	-8.79197	-12.9658	0.511297	5.64422	4.30226	-4.28835	-1.99562	4	CL7618	DC	5	2	F223-0558	5	2-[2-(acetylamino)-1,3-benzothiazol-6-yl]-N-(2-fluorobenzyl)acetamide	99.33	Fc1c(CNC(=O)Cc2cc3sc(NC(=O)C)nc3cc2)cccc1	3	2.56	2.56	-4.28
omega_1361710	-8.79169	-11.0591	0.322419	4.67606	4.15123	-2.14555	-4.73679	7	CL1046	NC	4	4	K844-0789	6	N-(2-hydroxyethyl)-2-(4-hydroxy-2-oxo-1,2-dihydroquinolin-3-yl)acetamide	98.66	O=C(NCCO)CC=1C(=O)Nc2c(C=1O)cccc2	1	-0.6	-0.65	-0.61
omega_535305	-8.79138	-8.72325	0.597284	2.91613	4.1887	-5.22429	-2.54595	7		DC	5	2	8003-1278	6	3-fluoro-N~1~-(2-oxo-2-{2-[(E)-1-(2-pyridyl)methylidene]hydrazino}ethyl)benzamide	83.45	Fc1cc(C(=O)NCC(=O)N/N=C/c2ncccc2)ccc1	1	0.62	1.79	-1.5
omega_330214	-8.79071	-13.2879	0.583817	5.83572	2.3542	-2.93316	-1.3434	5	CL3030	DC	4	1	G677-0195	5	N-mesityl-6-(4-methoxyphenyl)-3-methylimidazo[2,1-b][1,3]thiazole-2-carboxamide	83.87	O=C(Nc1c(C)cc(C)cc1C)C1=C(C)n2c(S1)nc(-c1ccc(OC)cc1)c2	111	6.2	4.59	-7.07
omega_1431632	-8.78986	-11.5934	0.961732	4.12917	5.6968	-4.55779	-3.42632	8	CL9020	NC	6	3	L879-0250	6	N-{1-[(1H-1,3-benzimidazol-2-ylamino)carbonyl]-2-methylbutyl}-4-(trifluoromethyl)benzamide	86.88	FC(F)(F)c1ccc(C(=O)NC(C(=O)Nc2[nH]c3c(n2)cccc3)C(CC)C)cc1	80	2.32	4.46	-0.95
omega_798548	-8.78941	-10.7805	0.562491	3.8534	3.67603	-3.93468	-2.16617	3		DC	5	1	8016-7622	5	N~3~-benzyl-4-oxo-4H-pyrido[1,2-a]pyrimidine-3-carboxamide	61.77	O=C(NCc1ccccc1)C=1C(=O)N2C(=NC=1)C=CC=C2	31	1.55	1.55	-3.25
omega_621692	-8.78875	-8.16296	0.149281	2.41629	4.89996	-3.31724	-4.77407	3		DC	6	3	8020-0722	6	3-(1H-1,2,3,4-tetraazol-5-yl)-1,2-benzenediol	94.92	Oc1c(O)cccc1-c1[nH]nnn1	49	0.46525	0.58	1.60471
omega_52880	-8.78826	-9.86849	0.461275	3.79352	4.43471	-4.05893	-3.55036	7	CL2242	DC	4	3	D090-0083	6	N~1~-(2-hydroxyethyl)-N~2~-quinazolin-4-ylglycinamide	87.14	O=C(NCCO)CNc1ncnc2c1cccc2	126	0.34	-0.02	-0.1
omega_15044	-8.78804	-13.3783	0.470403	5.37471	3.12216	-2.37685	-2.00012	5	CL3446	DC	5	0	C679-3560	5	7-[(2,5-dimethylphenoxy)methyl]-2-propyl-5H-[1,3,4]thiadiazolo[3,2-a]pyrimidin-5-one	79.56	O(CC=1N=C2SC(CCC)=NN2C(=O)C=1)c1c(C)ccc(C)c1	40	3.18	4.29	-2.06
omega_1234020	-8.78803	-11.1547	0.443096	4.01965	3.54611	-2.67869	-2.96352	3	CL2813A	NC	6	1	D358-0060	5	N-(2,6-difluorophenyl)-5-oxo-5H-[1,3]thiazolo[3,2-a]pyrimidine-6-carboxamide	87.07	Fc1c(NC(=O)C=2C(=O)N3C(SC=C3)=NC=2)c(F)ccc1	270	2.2	1.04	-4.7
omega_1474670	-8.78733	-13.8701	0.508161	5.41637	3.1498	-2.20571	-1.78588	5	CL6310	NC	4	2	M830-6489	4	2-[(4-fluorophenyl)amino]-4-methyl-N-(5,6,7,8-tetrahydronaphthalen-1-yl)-1,3-thiazole-5-carboxamide	82.26	Fc1ccc(Nc2sc(C(=O)Nc3c4c(ccc3)CCCC4)c(C)n2)cc1	88	5.143	5.785	-4.68
omega_992510	-8.78686	-10.2237	0.335818	3.26782	3.88325	-2.91898	-3.13104	3	CM3848	IC	5	2	S562-0113	5	N-[(7-oxo-2-azepanyl)methyl]-3-furamide	71.34	O=C(NCC1NC(=O)CCCC1)c1cocc1	18	0.49	0.49	-1.75
omega_1500262	-8.78676	-11.0936	0.587019	4.01595	3.70283	-3.28454	-2.71444	5	CM0615	NC	4	3	P574-2348	6	2-(2-amino-4-ethyl-5-methyl-6-oxopyrimidin-1(6H)-yl)-N-(4-bromophenyl)acetamide	87.79	Brc1ccc(NC(=O)CN2C(=O)C(C)=C(CC)N=C2N)cc1	61	2.888	2.642	-0.92
omega_15054	-8.78647	-13.739	0.570654	5.86038	3.06905	-2.43395	-2.11361	6	CL3446	DC	5	0	C679-3686	5	7-[(2-allylphenoxy)methyl]-2-phenyl-5H-[1,3,4]thiadiazolo[3,2-a]pyrimidin-5-one	79.56	O(CC=1N=C2SC(c3ccccc3)=NN2C(=O)C=1)c1c(CC=C)cccc1	17	3.79	4.86	-5.02
omega_14964	-8.78618	-14.0655	0.535038	6.08843	3.08145	-2.45757	-1.96806	7	CL3446	DC	6	0	C679-2888	6	7-[(2-allylphenoxy)methyl]-2-(4-methoxyphenyl)-5H-[1,3,4]thiadiazolo[3,2-a]pyrimidin-5-one	88.79	O(CC=1N=C2SC(c3ccc(OC)cc3)=NN2C(=O)C=1)c1c(CC=C)cccc1	44	3.8	4.85	-5.01
omega_207758	-8.7861	-13.8839	0.673564	5.71547	4.92597	-4.10316	-2.11402	4	CL7618	DC	7	2	F223-0455	6	2-[2-(acetylamino)-1,3-benzothiazol-6-yl]-N~1~-[2-(1H-indol-3-yl)ethyl]acetamide	87.74	O=C(NCCc1c2c([nH]c1)cccc2)Cc1cc2sc(NC(=O)C)nc2cc1	1	2.23	2.23	-3.08
omega_196565	-8.78599	-12.9937	0.845177	5.67025	5.20001	-4.78495	-2.72276	6	CL7565	DC	5	1	F081-1470	7	2-(4-oxo-7,8,9,10-tetrahydropyrimido[4',5':4,5]furo[2,3-b]quinolin-3(4H)-yl)-N-(2-phenylethyl)acetamide	87.8	O=C(NCCc1ccccc1)CN1C(=O)c2oc3nc4c(cc3c2N=C1)CCCC4	94	1.53	2.27	-2.97
omega_1243766	-8.78581	-13.4441	0.634917	5.71296	3.39149	-3.77475	-1.30632	3	CL7492	NC	4	0	D645-0018	5	2-[(1-naphthyloxy)methyl][1,2,4]triazolo[1,5-c]quinazoline	52.31	O(Cc1nn2c(n1)-c1c(N=C2)cccc1)c1c2c(ccc1)cccc2	7	4.53	3.959	-5.03
omega_714606	-8.78553	-10.4936	0.525997	3.74327	3.86819	-4.23016	-2.19926	4	CL2813A	DC	5	1	G896-0521	6	3-methyl-N-[(5-methyl-2-furyl)methyl]-5-oxo-5H-[1,3]thiazolo[3,2-a]pyrimidine-6-carboxamide	100.21	O=C(NCc1oc(C)cc1)C=1C(=O)N2C(C)=CSC2=NC=1	136	2.16	0.47	-3.31
omega_291641	-8.78549	-12.6106	0.598828	4.58986	2.98709	-1.98464	-2.366	4	CL6241	DC	4	2	G275-0922	5	N-mesityl-5-(3-methyl-1H-pyrazol-5-yl)thiophene-2-sulfonamide	111.47	[SH0]([O+H]c1sc(-c2[nH]nc(C)c2)cc1)([O-])=Nc1c(C)cc(C)cc1C	73	4.29	4.58	-3.51
omega_155436	-8.7852	-13.528	0.574031	5.35064	3.54533	-2.82414	-1.90303	3	CL4837	DC	6	1	E559-0729	6	N-(4-fluoro-2-methylphenyl)-2,7-dimethyl-5-oxo-5H-[1,3]thiazolo[3,2-a]pyrimidine-6-sulfonamide	112.52	[SH0]([O+H]C=1C(=O)N2C(SC(C)=C2)=NC=1C)([O-])=Nc1c(C)cc(F)cc1	96	1.23	1.79	-3.03
omega_1372936	-8.78472	-12.5561	0.455608	4.22232	2.9797	-2.58374	-1.30253	5	CL8526	NC	6	1	L228-0424	5	N-(4-chlorophenyl)-5-(2-cyclopropyl-1,3-oxazol-5-yl)thiophene-2-sulfonamide	108.82	Clc1ccc(N=[SH0]([O+H]c2sc(-c3oc(C4CC4)nc3)cc2)[O-])cc1	139	4.67	3.97	-5.87
omega_276586	-8.78463	-12.6173	0.395678	4.21057	2.28369	-1.87328	-1.18399	4	CL6023	DC	5	1	G008-4265	5	N-(3,5-dimethylphenyl)-5-(3-methylisoxazol-5-yl)thiophene-2-sulfonamide	108.82	[SH0]([O+H]c1sc(-c2onc(C)c2)cc1)([O-])=Nc1cc(C)cc(C)c1	84	3.82	4.1	-6.2
omega_87090	-8.78437	-13.1623	0.533856	6.03742	4.19787	-3.76405	-2.62716	2	CL7372	DC	3	2	D351-0148	6	5-{[(2,4-dimethylphenyl)amino]methyl}-2-(4-methylphenyl)[1,2,4]triazolo[1,5-a]pyrimidin-7(4H)-one	71.84	O=C1n2nc(-c3ccc(C)cc3)nc2NC(CNc2c(C)cc(C)cc2)=C1	162	1.8	3.8	-2.91
omega_1322926	-8.78437	-12.6514	0.745532	4.79546	3.28773	-4.1743	-0.787425	4	CL6074	NC	5	0	G607-0842	6	1-propyl-3-(3-pyridin-2-yl-1,2,4-oxadiazol-5-yl)quinolin-4(1H)-one	72.12	O=C1C(c2onc(-c3ncccc3)n2)=CN(CCC)c2c1cccc2	31	1.45	2.99	-2.5
omega_584504	-8.78381	-12.8324	0.469826	5.63131	2.67373	-3.33329	-1.39294	3		DC	3	1	8013-0399	3	2,5-dichloro-N~3~-(2-ethylphenyl)-4,6-dimethylnicotinamide	41.99	Clc1c(C)c(C(=O)Nc2c(CC)cccc2)c(Cl)nc1C	36	4.2659	3.51	-6.1819
omega_22674	-8.7835	-9.63529	0.552449	4.07185	4.24901	-4.64428	-3.37724	6	CV0299	DC	4	2	C720-0636	6	2-hydroxy-N-(3-methylbutyl)-4-oxo-4H-pyrido[1,2-a]pyrimidine-3-carboxamide	82	O=C(NCCC(C)C)C=1C(=O)N2C(=NC=1O)C=CC=C2	101	0.08	0.82	-1.25
omega_343410	-8.78337	-10.1295	0.602805	3.67473	5.61555	-4.63092	-3.91608	3	CL2892	DC	7	3	G801-0054F	7	2-oxo-N-(tetrahydro-2-furanylmethyl)-2,3-dihydro-1H-1,3-benzimidazole-5-sulfonamide	104.91	S(=O)(=O)(NCC1OCCC1)c1cc2NC(=O)Nc2cc1	2	-0.0728	-0.0726	-2.36
omega_271783	-8.78337	-13.2266	0.38214	5.04752	4.19867	-3.86152	-1.32356	2	CL8429	DC	3	1	F937-1697	4	N-benzyl-4-methyl-2-phenylpyrimidine-5-carboxamide	54.88	O=C(NCc1ccccc1)c1c(C)nc(-c2ccccc2)nc1	2	2.93	2.75	-4.55
omega_1359221	-8.78299	-11.086	0.700142	4.1771	2.71386	-2.13255	-3.15551	6		NC	4	2	K786-0823	4	2-{[(4-fluorobenzyl)amino]carbonyl}benzoic acid	66.4	Fc1ccc(CNC(=O)c2c(C(=O)O)cccc2)cc1	22	-0.58	2.43	-0.53
omega_418358	-8.78221	-9.03395	0.348898	4.1521	4.12555	-4.3053	-4.0695	5		DC	4	3	3254-0758	7	2-(5-methyl-3-oxo-2,3-dihydro-1H-pyrazol-4-yl)-N'-[(1E)-1-pyridin-4-ylethylidene]acetohydrazide	95.48	O=C(NN=C(C)c1ccncc1)CC=1C(=O)NNC=1C	1	-1.29	-0.69	1.63
omega_416589	-8.78107	-10.6068	0.380765	4.07352	3.64705	-3.25658	-3.01906	7		DC	4	3	3253-2213	6	N'-[(1E)-(3-allyl-2-hydroxyphenyl)methylene]-3-methyl-1H-pyrazole-5-carbohydrazide	90.37	O=C(NN=Cc1c(O)c(CC=C)ccc1)c1[nH]nc(C)c1	163	2.34	2.44	-1.49
omega_944213	-8.78099	-11.7156	0.651783	3.6291	5.05538	-3.83343	-2.5682	5	CL4666	DC	7	2	8018-0110	7	N~5~-[2-(1H-1,3-benzimidazol-2-yl)ethyl]-3-(2-thienyl)-1,2,4-oxadiazole-5-carboxamide	124.94	O=C(NCCc1[nH]c2c(n1)cccc2)c1onc(-c2sccc2)n1	31	3.61	3.63	-5.02
omega_1474653	-8.78098	-13.1507	0.438942	5.53099	3.14773	-2.67483	-2.07315	5	CL6310	NC	5	2	M830-6457	4	N-(5-fluoro-2-methylphenyl)-2-[(3-fluorophenyl)amino]-4-methyl-1,3-thiazole-5-carboxamide	82.26	Fc1cc(NC(=O)c2c(C)nc(Nc3cc(F)ccc3)s2)c(C)cc1	124	3.623	4.963	-2.22
omega_53303	-8.78053	-12.2365	0.393398	3.23068	3.88549	-3.2156	-0.838045	2	CL3239	DC	5	1	D101-0158	5	4-fluoro-N-[(3-phenyl-1,2,4-oxadiazol-5-yl)methyl]benzamide	68.02	Fc1ccc(C(=O)NCc2onc(-c3ccccc3)n2)cc1	134	1.66	2.41	-4.19
omega_510250	-8.78052	-10.2445	0.292565	3.10622	2.11048	-2.65138	-1.39392	3		DC	4	1	6228-1916	4	1-Ethyl-1H-pyrazole-3-carboxylic acid (2-chloro-phenyl)-amide	46.92	Clc1c(NC(=O)c2nn(CC)cc2)cccc1	2	2.58	1.52	-2.59
omega_355663	-8.78045	-13.441	0.429743	5.0642	4.49371	-1.46427	-3.86286	7		DC	7	3	0584-0631	9	2-{[(2-carboxyphenyl)amino]carbonyl}-5-nitrobenzoic acid	149.52	O=[N+]([O-])c1cc(C(=O)O)c(C(=O)Nc2c(C(=O)O)cccc2)cc1	29	-2.62	1.72	6.27
omega_646756	-8.78042	-12.5886	0.719172	5.89708	4.61001	-3.73055	-3.68752	9	CL1755	DC	3	2	C190-0011	6	2,4-dioxo-3-pentyl-N-phenethyl-1,2,3,4-tetrahydro-7-quinazolinecarboxamide	78.51	O=C(NCCc1ccccc1)c1cc2NC(=O)N(CCCCC)C(=O)c2cc1	70	4.97	4.19	-1.94
omega_901648	-8.77998	-14.4669	0.456182	5.386	4.47394	-3.05277	-1.57641	4	CL5285A	DC	7	1	Y040-4643	7	2-(6,7-dimethoxy-4-methyl-2-oxo-2H-chromen-3-yl)-N~1~-(2-pyridyl)acetamide	86.75	O=C(Nc1ncccc1)CC=1C(=O)Oc2c(C=1C)cc(OC)c(OC)c2	17	1.4825	1.47	-3.2408
omega_124464	-8.77982	-13.597	0.449841	5.07069	5.18543	-3.22788	-2.66088	4	CM0132	DC	9	3	D668-0276	7	N-[4-chloro-3-(trifluoromethyl)phenyl]-2-hydroxy-4-methyl-6-oxo-1,6-dihydropyrimidine-5-sulfonamide	116.24	Clc1c(C(F)(F)F)cc(NS(=O)(=O)C2=C(C)N=C(O)NC2=O)cc1	148	1.05	1.614	-0.9
omega_284948	-8.77974	-11.1037	0.534239	4.64052	4.74638	-4.65562	-2.94158	7	CL6481	DC	7	1	G205-0952	9	N-[2-(4-ethylpiperazin-1-yl)ethyl]-5-oxo-2-pyrrolidin-1-yl-5H-[1,3,4]thiadiazolo[3,2-a]pyrimidine-6-carboxamide	109.15	O=C(NCCN1CCN(CC)CC1)C=1C(=O)N2N=C(N3CCCC3)SC2=NC=1	109	-1.63	1.3	0.4
omega_510410	-8.77962	-10.2561	0.297953	3.13991	2.11461	-2.70356	-1.37241	4		DC	2	1	6228-2330	4	1-Ethyl-1H-pyrazole-3-carboxylic acid (3,4-dimethyl-phenyl)-amide	46.92	O=C(Nc1cc(C)c(C)cc1)c1nn(CC)cc1	88	2.31	2.46	-2.57
omega_419922	-8.77954	-8.74332	0.63778	4.94475	5.63916	-6.77839	-4.47952	5		DC	5	2	3254-4016	6	3-(5-methyl-2-thienyl)-N'~5~-[(E)-1-(2-pyridyl)methylidene]-1H-pyrazole-5-carbohydrazide	83.03	O=C(NN=Cc1ncccc1)c1[nH]nc(-c2sc(C)cc2)c1	87	2.17	3.21	-1.57
omega_1342845	-8.77863	-10.5437	0.688378	3.88082	3.8238	-4.30217	-2.32576	4	CL2813A	NC	5	1	G896-0489	5	N-(4-fluorobenzyl)-3-methyl-5-oxo-5H-[1,3]thiazolo[3,2-a]pyrimidine-6-carboxamide	87.07	Fc1ccc(CNC(=O)C=2C(=O)N3C(C)=CSC3=NC=2)cc1	120	2.19	1.35	-3.13
omega_984363	-8.77856	-11.6343	0.596521	3.76124	5.12711	-4.74029	-1.88885	4	CM3807	IC	9	1	S460-0892	9	{3-[4-(3-cyclopropyl-1,2,4-oxadiazol-5-yl)-1H-1,2,3-triazol-1-yl]-1-pyrrolidinyl}(1H-pyrrol-2-yl)methanone	105.73	O=C(N1CC(n2nnc(-c3onc(C4CC4)n3)c2)CC1)c1[nH]ccc1	80	3.85	3.85	-5.85
omega_1525737	-8.7784	-15.2633	0.459983	6.43927	3.04928	-2.43002	-1.03363	5	CM1573	NC	5	0	T743-0094	6	5-[1-(3-methoxybenzyl)-1H-pyrrol-2-yl]-3-(4-pyridyl)-1,2,4-oxadiazole	65.97	O(C)c1cc(Cn2c(-c3onc(-c4ccncc4)n3)ccc2)ccc1	100	3.001	2.598	-3.96
omega_1389553	-8.77794	-13.4912	0.588667	4.54595	5.30179	-3.09858	-2.62456	3	CL4819	NC	5	3	L388-0025	8	N,1-bis(4-fluorophenyl)-2,5-dioxo-1,2,5,6,7,8-hexahydroquinoline-3-carboxamide	118	O=C(Nc1c(C(=O)N)cccc1)CN1C(=O)c2oc3c(c2N=C1)cccc3	53	-0.34	0.517	-1.25
omega_944579	-8.77781	-14.7281	0.4017	6.04886	2.24906	-1.92166	-0.827646	4		DC	4	1	8018-0763	4	N~5~-(1,2-dihydro-5-acenaphthylenyl)-1-methyl-3-propyl-1H-pyrazole-5-carboxamide	46.92	O=C(Nc1c2c3c(cc1)CCc3ccc2)c1n(C)nc(CCC)c1	31	3.39	3.39	-6.13
omega_354268	-8.77742	-10.6209	0.403432	4.83751	2.55818	-3.76188	-2.19374	5		DC	6	2	0422-0039	6	8-hydroxyquinoline-2-carbaldehyde [(1E)-(8-hydroxyquinolin-2-yl)methylene]hydrazone	90.96	Oc1c2nc(C=NN=Cc3nc4c(O)cccc4cc3)ccc2ccc1	2	2.18	5.31	-2.87
omega_492043	-8.7762	-11.361	0.745679	5.64876	4.69485	-3.95387	-4.55065	6		DC	4	4	5547-0680	7	4-[[4-(dimethylamino)phenyl](5-hydroxy-3-methyl-1H-pyrazol-4-yl)methyl]-3-methyl-1H-pyrazol-5-ol	101.06	Oc1c(C(c2c(O)[nH]nc2C)c2ccc(N(C)C)cc2)c(C)n[nH]1	46	2.82	2.42	-1.56
omega_305447	-8.77491	-11.4937	0.493826	4.38274	6.15817	-4.47344	-3.8425	2	CL4393	DC	6	3	G409-0452	8	N-(2-ethyl-7-hydroxy-5-methyl[1,2,4]triazolo[1,5-a]pyrimidin-6-yl)-N'-(3-fluorophenyl)urea	104.44	Fc1cc(NC(=O)NC2=C(O)n3nc(CC)nc3N=C2C)ccc1	23	1.94	2.316	-2.99
omega_124436	-8.7746	-10.6494	0.618729	4.81598	5.04524	-4.46851	-4.13665	4	CM0132	DC	5	3	D668-0242	7	N~5~-(3,4-dimethylphenyl)-2-hydroxy-4-methyl-6-oxo-1,6-dihydro-5-pyrimidinesulfonamide	116.24	S(=O)(=O)(Nc1cc(C)c(C)cc1)C1=C(C)N=C(O)NC1=O	137	0.97	0.979	-1.09
omega_1026523	-8.77435	-11.7432	0.554256	6.37868	3.89898	-4.16977	-3.69329	5	CM4272	IC	6	2	S824-2391	6	[(3S,4R)-3-(hydroxymethyl)-4-(4-pyridyl)tetrahydro-1H-pyrrol-1-yl](5-methoxy-1H-indol-2-yl)methanone	78.45	O=C(N1C[C@@H](CO)[C@H](c2ccncc2)C1)c1[nH]c2c(c1)cc(OC)cc2	177	1.74	1.75	-2.47
omega_22584	-8.77419	-8.9347	0.632808	3.21158	4.72716	-4.13777	-4.27327	6	CV0299	DC	7	3	C720-0517	7	2-hydroxy-N-(3-hydroxypropyl)-9-methyl-4-oxo-4H-pyrido[1,2-a]pyrimidine-3-carboxamide	102.23	O=C(NCCCO)C=1C(=O)N2C(C(C)=CC=C2)=NC=1O	1	-1.21	1.07	1.73
omega_430967	-8.77399	-11.9808	0.53603	4.50447	2.93136	-1.35683	-3.40824	8	CL2165	DC	6	3	3448-3950	7	3-[(3,4-dihydroxyphenethyl)amino]-1-(4-methoxyphenyl)dihydro-1H-pyrrole-2,5-dione	99.1	O(C)c1ccc(N2C(=O)C(NCCc3cc(O)c(O)cc3)CC2=O)cc1	9	-4.48	2.78	0.32
omega_137427	-8.77383	-11.1969	0.405437	3.53057	3.59084	-2.6664	-2.43741	3	CL4356	DC	5	3	E138-2141	5	2-amino-5-bromo-N-(3-fluoro-4-methylphenyl)pyridine-3-sulfonamide	93.46	Brc1cc([O+H][SH0]([O-])=Nc2cc(F)c(C)cc2)c(N)nc1	98	2.11	2.4	-4.56
omega_6274	-8.77351	-11.1154	0.536365	4.69105	5.17915	-3.85614	-4.20857	4		DC	6	2	C612-1076	7	methyl 4-({[3-(hydroxymethyl)pyrazin-2-yl]carbonyl}amino)benzoate	101.41	O=C(OC)c1ccc(NC(=O)c2c(CO)nccn2)cc1	83	0.33	0.21	0.27
omega_703500	-8.77315	-13.8749	0.460769	5.70103	4.84705	-3.0405	-2.86655	4	CL5923	DC	4	2	G856-5789	5	2-bromo-N-[(4-oxo-3,4-dihydrophthalazin-1-yl)methyl]benzamide	70.56	Brc1c(C(=O)NCC2=NNC(=O)c3c2cccc3)cccc1	167	2.69	2.31	-1.78
omega_184934	-8.77303	-13.8328	0.660013	5.87898	3.19464	-2.92421	-1.74967	8	CL3918A	DC	5	1	E958-0215	7	N-[2-(2-methoxyphenyl)ethyl]-1-[5-(1H-pyrrol-1-yl)-1,3,4-thiadiazol-2-yl]piperidine-4-carboxamide	100.52	O=C(NCCc1c(OC)cccc1)C1CCN(c2sc(-n3cccc3)nn2)CC1	224	3.23	3.09	-4.44
omega_62123	-8.77291	-11.0432	0.271103	3.43097	3.66101	-3.00766	-2.08516	6	CL5013	DC	6	2	D205-0390	7	N-(7-hydroxy-5-propyl[1,2,4]triazolo[1,5-a]pyrimidin-2-yl)thiophene-2-carboxamide	120.65	O=C(Nc1nn2C(O)=CC(CCC)=Nc2n1)c1sccc1	108	0.49	2.95	-0.94
omega_47157	-8.77269	-10.4761	0.36875	3.8032	4.44402	-4.84502	-2.06751	4	CL2653	DC	6	1	D043-0313	8	methyl [2-(2-furyl)-5-methyl-7-oxo-4,7-dihydro[1,2,4]triazolo[1,5-a]pyrimidin-6-yl]acetate	99.25	O=C(OC)CC=1C(=O)n2nc(-c3occc3)nc2NC=1C	30	-0.66	0.31	-1.58
omega_41610	-8.77261	-12.9844	0.439291	5.51861	4.31567	-4.35121	-1.71059	6	CL4403A	DC	4	1	C999-0233	6	2-(5,7-dimethyl-2-phenylpyrazolo[1,5-a]pyrimidin-6-yl)-N-(2-furylmethyl)acetamide	72.43	O=C(NCc1occc1)CC1=C(C)n2nc(-c3ccccc3)cc2N=C1C	1	4.37	2.33	-3.08
omega_359870	-8.77207	-10.5206	0.366436	3.19963	4.07374	-3.73871	-2.15253	7		DC	4	2	0896-8800	6	N-(2-{2-[(E)-1-(2-furyl)methylidene]hydrazino}-2-oxoethyl)benzamide	83.7	O=C(NN=Cc1occc1)CNC(=O)c1ccccc1	104	1.37	1.14	-1.27
omega_1004594	-8.77173	-10.2016	0.37081	4.83566	3.51234	-4.10364	-3.18535	2	CM4193	IC	6	1	S636-0027	6	7-[2-(4-chlorophenyl)acetyl]-2,5,6,7,8,9-hexahydro-3H-[1,2,4]triazolo[4,3-d][1,4]diazepin-3-one	65.01	Clc1ccc(CC(=O)N2CCN3C(=O)NN=C3CC2)cc1	101	0.66	0.78	-3.13
omega_113283	-8.77159	-11.7264	0.615918	5.18181	4.14097	-4.09137	-2.89251	4	CL7372	DC	1	4	D489-0158	6	5-{[(3-chloro-4-methylphenyl)amino]methyl}-2-(2-thienyl)[1,2,4]triazolo[1,5-a]pyrimidin-7(4H)-one	100.08	Clc1c(C)ccc(NCC=2Nc3n(C(=O)C=2)nc(-c2sccc2)n3)c1	172	1.73	2.79	-2.62
omega_1474481	-8.77158	-13.6532	0.414857	5.28964	3.13593	-2.13418	-1.82461	5	CL6310	NC	4	2	M830-2220	4	5-[5-(4-isopropylphenyl)-1,2,4-oxadiazol-3-yl]-1-(3-oxo-3-pyrrolidin-1-ylpropyl)-1H-benzimidazole	82.26	Clc1c(C)c(NC(=O)c2c(C)nc(Nc3cc(C)ccc3)s2)ccc1	55	4.733	5.703	-5.13
omega_1420373	-8.77092	-10.1702	0.220922	3.16234	4.6404	-3.5033	-3.1211	5	CL3705	NC	3	2	L793-0019	5	2-[5-[3-(4-methoxyphenyl)-1,2,4-oxadiazol-5-yl]-2-oxopyridin-1(2H)-yl]-N-(4-methylbenzyl)acetamide	74.85	O=C(NCc1cnccc1)C(=O)c1[nH]ccc1	30	-0.19	0.19	0.42
omega_128685	-8.77041	-11.9662	0.406197	4.40585	3.75	-3.29586	-2.07036	5		DC	4	1	D718-0288	5	6-benzyl-2-(benzylthio)-5-methyl[1,2,4]triazolo[1,5-a]pyrimidin-7(4H)-one	85.11	S(Cc1ccccc1)c1nn2C(=O)C(Cc3ccccc3)=C(C)Nc2n1	34	1.371	4.582	-4.72
omega_714604	-8.77024	-11.3115	0.739389	5.08989	3.77308	-4.03067	-3.03047	3	CL2813A	DC	4	1	G896-0493	5	3-methyl-5-oxo-N-(1,2,3,4-tetrahydronaphthalen-1-yl)-5H-[1,3]thiazolo[3,2-a]pyrimidine-6-carboxamide	87.07	O=C(NC1c2c(cccc2)CCC1)C=1C(=O)N2C(C)=CSC2=NC=1	34	2.98	2.16	-3.34
omega_609383	-8.76989	-8.9891	0.205018	2.88292	4.39178	-3.20905	-4.05147	4		DC	6	4	8018-1578	6	4-[(4-pyridylmethyl)amino]-1H-pyrazole-5-carboxamide	96.69	O=C(N)c1c(NCc2ccncc2)cn[nH]1	39	-3.517	-0.22	2.00901
omega_585166	-8.76942	-12.4904	0.347383	4.80986	2.59246	-2.7495	-1.27917	3		DC	5	1	8013-1163	3	2,6-dichloro-N~3~-(2-fluorophenyl)-4-methylnicotinamide	41.99	Clc1c(C(=O)Nc2c(F)cccc2)c(C)cc(Cl)n1	46	3.18	3.9	-3.97
omega_542714	-8.76906	-11.6388	0.310291	4.19416	3.10756	-2.32071	-2.4216	6		DC	4	3	8004-5486	6	N~1~-(2-fluorophenyl)-2-{2-[(E)-1-(1H-indol-3-yl)methylidene]hydrazino}-2-oxoacetamide	86.35	Fc1c(NC(=O)C(=O)NN=Cc2c3c([nH]c2)cccc3)cccc1	1	1.32	1.89	-2.55
omega_917125	-8.76906	-13.7455	0.451816	5.4899	5.08628	-3.18803	-2.86354	5		DC	6	2	Y043-2096	6	N-(4-methoxybenzyl)-2-(4-oxo-3,4-dihydro-1-phthalazinyl)acetamide	79.79	O=C(NCc1ccc(OC)cc1)CC1=NNC(=O)c2c1cccc2	30	1.63	1.63	-3.48
omega_892457	-8.76896	-11.0508	0.304669	4.1792	2.60216	-3.19536	-1.60881	2		DC	3	1	Y031-8860	3	N-(3-chloro-4-fluorophenyl)nicotinamide	41.99	Clc1c(F)ccc(NC(=O)c2cnccc2)c1	100	3.13	3.13	-4.21
omega_907938	-8.76892	-10.4461	0.412695	5.12202	3.15209	-3.50019	-3.50941	5		DC	5	3	Y041-2659	5	4-[4-(2-bromophenoxy)-1H-pyrazol-3-yl]-1,3-benzenediol	78.37	Brc1c(Oc2c(-c3c(O)cc(O)cc3)n[nH]c2)cccc1	1	3.68	3.82	-4.94
omega_800425	-8.76766	-13.9479	0.337687	4.84018	1.62264	-0.590214	-1.03007	2	CL3104	DC	4	1	8017-0634	4	4-cyano-2-fluoro-N~1~-(8-quinolyl)benzamide	65.78	Fc1c(C(=O)Nc2c3ncccc3ccc2)ccc(C#N)c1	31	2.93	2.93	-5.65
omega_22677	-8.76722	-8.52174	0.508082	3.01421	4.81376	-4.6849	-3.89664	6	CV0299	DC	5	3	C720-0640	7	2-hydroxy-N-(2-hydroxyethyl)-4-oxo-4H-pyrido[1,2-a]pyrimidine-3-carboxamide	102.23	O=C(NCCO)C=1C(=O)N2C(=NC=1O)C=CC=C2	21	-2.18	-1.3	0.79
omega_107104	-8.76713	-12.4545	0.586362	4.9744	4.79832	-4.60696	-2.06474	4	CL6729A	DC	5	1	D458-0736	6	N-(4-chlorophenyl)-2-(5,7-dimethyl-2-propyl[1,2,4]triazolo[1,5-a]pyrimidin-6-yl)acetamide	72.18	Clc1ccc(NC(=O)CC2=C(C)n3nc(CCC)nc3N=C2C)cc1	230	3.49	3.37	-6.17
omega_1289546	-8.76693	-12.0961	0.641742	4.87558	3.12774	-3.05055	-2.2653	3	CL7852	NC	4	1	F692-0285	5	7,8-dimethyl-N-(2-methylphenyl)-4-oxo-4H-[1,3]thiazino[3,2-a]benzimidazole-2-carboxamide	89.29	O=C(Nc1c(C)cccc1)C=1Sc2n(C(=O)C=1)c1c(n2)cc(C)c(C)c1	20	2.58	4.62	-3.07
omega_169497	-8.76688	-11.5538	0.410345	5.31459	2.47313	-1.21517	-4.19593	7	CL5182	DC	4	3	E742-0068	5	5-(hydroxymethyl)-4-{[(2-methoxyphenyl)amino]methyl}-2-methylpyridin-3-ol	74.61	O(C)c1c(NCc2c(O)c(C)ncc2CO)cccc1	1	2.12	1.19	-2.36
omega_685256	-8.76633	-13.7073	0.881419	5.10134	4.4281	-2.75051	-2.71938	7	CL2560	DC	5	2	C385-0366	7	N-benzyl-6-{[(2-fluorophenyl)amino]sulfonyl}-N-methyl-4-oxo-1,4-dihydroquinoline-3-carboxamide	95.58	S(=O)([O-])(=Nc1c(F)cccc1)c1cc2C(=O)C(C(=O)N(Cc3ccccc3)C)=CNc2cc1	189	5.72	2.59	-3.82
omega_1500326	-8.76615	-12.3539	0.508005	4.54026	3.727	-2.93424	-2.25328	5	CM0615	NC	3	3	P574-4039	6	2-[2-amino-4-isopropyl-6-oxo-1(6H)-pyrimidinyl]-N~1~-(2,5-dimethylphenyl)acetamide	87.79	O=C(Nc1c(C)ccc(C)c1)CN1C(N)=NC(C(C)C)=CC1=O	13	2.768	2.632	-0.5
omega_941983	-8.76437	-10.1354	0.425784	3.32769	3.08883	-2.77486	-2.69638	4		DC	5	3	8017-5828	5	5-[(3,5-dibromo-2-hydroxybenzyl)amino]-1H-pyrazole-4-carbonitrile	84.73	Brc1c(O)c(CNc2c(C#N)cn[nH]2)cc(Br)c1	31	2.52	2.75	-4.83
omega_1291820	-8.76408	-13.2696	0.414476	4.81367	3.72911	-1.74527	-2.7065	3	CL8342	NC	4	2	F731-0302	5	N-(8-chloro-11-oxo-10,11-dihydrodibenzo[b,f][1,4]oxazepin-2-yl)-4-fluorobenzamide	67.43	Clc1cc2NC(=O)c3c(Oc2cc1)ccc(NC(=O)c1ccc(F)cc1)c3	102	4.09	4.27	-5.91
omega_376104	-8.76398	-10.7438	0.412599	3.83072	3.65198	-3.58746	-2.32802	8		DC	4	2	1761-0925	5	4-oxo-N-phenyl-4-[(2E)-2-(thien-2-ylmethylene)hydrazino]butanamide	70.56	O=C(NN=Cc1sccc1)CCC(=O)Nc1ccccc1	98	1.42	2.31	-1.77
omega_1080120	-8.76391	-11.8555	0.324407	4.16309	2.70649	-2.07671	-2.02565	6	CM4373A	IC	5	2	T151-0355	5	N-[2-(1-cyclobutyl-5-methyl-1H-imidazol-2-yl)ethyl]-N'-propylurea	58.95	O=C(NCCC)NCCc1n(c(C)cn1)C1CCC1	31	0.75	1.42	-5.74
omega_181738	-8.76386	-12.7192	0.60957	5.90406	3.14187	-3.25977	-2.44044	5	CL6032	DC	5	1	E946-0419	6	ethyl 6-methyl-4-[(3-methylphenyl)amino]furo[2,3-d]pyrimidine-5-carboxylate	77.25	O=C(OCC)c1c(C)oc2ncnc(Nc3cc(C)ccc3)c12	2	-0.09	3.34	-2.07
omega_1004897	-8.7638	-9.53849	0.398067	3.70591	3.97091	-3.95892	-3.34127	2	CM4193	IC	7	1	S636-4985	7	7-[(1,3-dimethyl-1H-pyrazol-4-yl)methyl]-2,5,6,7,8,9-hexahydro-3H-[1,2,4]triazolo[4,3-d][1,4]diazepin-3-one	65.76	O=C1N2C(=NN1)CCN(Cc1c(C)nn(C)c1)CC2	16	-2.04	-1.64	-1.58
omega_438142	-8.76359	-11.9862	0.288703	5.31074	2.45201	-2.82083	-2.00802	2	CL2242	DC	4	1	3651-6057	3	N-(3,5-dichlorophenyl)quinazolin-4-amine	37.81	Clc1cc(Cl)cc(Nc2ncnc3c2cccc3)c1	2	3.04	4.81	-3.66
omega_772167	-8.76356	-13.9442	0.78342	5.03044	4.72667	-2.65439	-2.70553	9	CL2560	DC	5	2	K788-3968	8	N-benzyl-6-{[(4-ethoxyphenyl)amino]sulfonyl}-N-methyl-4-oxo-1,4-dihydroquinoline-3-carboxamide	104.81	S(=O)([O-])(=Nc1ccc(OCC)cc1)c1cc2C(=O)C(C(=O)N(Cc3ccccc3)C)=CNc2cc1	199	5.51	2.71	-4.98
omega_284935	-8.76351	-9.44722	0.6423	4.18369	4.5795	-5.64433	-3.07745	6	CL6481	DC	5	1	G205-0877	7	5-oxo-N-(2-phenylethyl)-2-pyrrolidin-1-yl-5H-[1,3,4]thiadiazolo[3,2-a]pyrimidine-6-carboxamide	102.67	O=C(NCCc1ccccc1)C=1C(=O)N2N=C(N3CCCC3)SC2=NC=1	5	2.11	2.76	-2.62
omega_779768	-8.76275	-12.4771	0.434674	5.55875	4.78391	-4.35584	-2.70711	6		DC	5	2	K844-0524	7	1-ethyl-4-hydroxy-2-oxo-N'-[(1E)-pyridin-2-ylmethylene]-1,2-dihydroquinoline-3-carbohydrazide	94.89	O=C(NN=Cc1ncccc1)C=1C(=O)N(CC)c2c(C=1O)cccc2	22	0.25	1.9	-0.66
omega_44577	-8.7622	-12.3694	0.398474	4.25847	1.8586	-1.81261	-1.09577	6	CL1721	DC	2	1	D011-6093	4	N-{2-[1-(1-phenylethyl)-1H-benzimidazol-2-yl]ethyl}acetamide	46.92	O=C(NCCc1n(C(C)c2ccccc2)c2c(n1)cccc2)C	377	3.42	3.08	-5.08
omega_492566	-8.76167	-13.365	0.255308	5.35914	1.33319	-1.01733	-1.32699	2	CL1299	DC	3	1	5588-0198	3	3-[(3,5-dimethylphenyl)amino]-2-benzofuran-1(3H)-one	38.33	O=C1OC(Nc2cc(C)cc(C)c2)c2c1cccc2	19	2.87	2.36	-3.06
omega_371589	-8.76075	-12.9177	0.595544	5.46213	2.19549	-1.26327	-2.83291	3	CL1133A	DC	4	1	1636-0186	7	2-[(1-naphthylamino)methyl]-5-nitro-1H-isoindole-1,3(2H)-dione	95.23	O=[N+]([O-])c1cc2C(=O)N(CNc3c4c(ccc3)cccc4)C(=O)c2cc1	7	4.06	3.35	-3.81
omega_279885	-8.76032	-12.0938	0.501167	5.09473	3.07918	-2.60258	-2.73905	5	CL3447	DC	5	2	G072-0068	5	7-{[(2-aminophenyl)sulfanyl]methyl}-2-isopropyl-5H-[1,3,4]thiadiazolo[3,2-a]pyrimidin-5-one	121.65	S(CC=1N=C2SC(C(C)C)=NN2C(=O)C=1)c1c(N)cccc1	2	1.42	1.42	-3.54
omega_56586	-8.76013	-10.6661	0.821779	4.75146	4.52652	-4.5155	-3.67832	8	CL5254	DC	6	3	D133-0032	7	ethyl 4-amino-2-{[2-(2,5-dimethylanilino)-2-oxoethyl]sulfanyl}-5-pyrimidinecarboxylate	132.5	S(CC(=O)Nc1c(C)ccc(C)c1)c1nc(N)c(C(=O)OCC)cn1	156	3.44	2.72	-3.18
omega_956670	-8.75925	-10.3678	0.363187	5.06301	2.91399	-3.73476	-2.99683	3	CM1461	IC	8	1	CM1461-1122	8	[1-methyl-3-(morpholinomethyl)-1,4,6,7-tetrahydro-5H-pyrazolo[4,3-c]pyridin-5-yl](1H-pyrazol-4-yl)methanone	79.28	O=C(N1Cc2c(CN3CCOCC3)nn(C)c2CC1)c1c[nH]nc1	2	-2.33	-2.32	-1.48
omega_542242	-8.75921	-9.73477	0.406583	3.43604	2.36289	-2.074	-3.15594	7		DC	4	3	8004-4541	5	2-hydroxy-N'~1~-[(E)-1-(3-hydroxyphenyl)methylidene]-2-phenylacetohydrazide	81.92	O=C(NN=Cc1cc(O)ccc1)C(O)c1ccccc1	1	1.47	1.8	-0.05
omega_284852	-8.75908	-12.4235	0.631753	4.76173	3.82299	-3.548	-2.00402	4	CL6481	DC	6	1	G205-0608	8	N-(2,4-dimethylphenyl)-2-morpholin-4-yl-5-oxo-5H-[1,3,4]thiadiazolo[3,2-a]pyrimidine-6-carboxamide	111.9	O=C(Nc1c(C)cc(C)cc1)C=1C(=O)N2N=C(N3CCOCC3)SC2=NC=1	91	1.23	2.63	-2.65
omega_1291783	-8.75885	-12.7623	0.446741	4.73211	3.52383	-2.29198	-2.40729	5	CL8342	NC	3	2	F731-0197	5	3-cyclopentyl-N-(8-methyl-11-oxo-10,11-dihydrodibenzo[b,f][1,4]oxazepin-2-yl)propanamide	67.43	O=C(Nc1cc2C(=O)Nc3c(Oc2cc1)ccc(C)c3)CCC1CCCC1	39	2.97	4.27	-4.77
omega_950698	-8.75865	-11.1046	0.52707	4.75321	5.39804	-5.56356	-2.76882	4	CL4577	DC	8	1	E016-0702	8	2-[2-(2-furyl)-4-oxopyrazolo[1,5-d][1,2,4]triazin-5(4H)-yl]-N~1~-isopropylacetamide	92.73	O=C(NC(C)C)CN1C(=O)c2n(nc(-c3occc3)c2)C=N1	1	1.58	1.58	-3.55
omega_1505556	-8.75791	-12.7918	0.474099	4.74685	3.11023	-3.63097	-0.666311	5	CM0906	NC	6	0	P668-0027	5	5-(4-fluorobenzyl)-3-[(5-methyl-2-phenyl-1,3-oxazol-4-yl)methyl]-1,2,4-oxadiazole	64.95	Fc1ccc(Cc2onc(Cc3c(C)oc(-c4ccccc4)n3)n2)cc1	35	3.941	3.817	-7.69
omega_670999	-8.75757	-12.6571	0.208138	4.28294	3.59447	-1.18931	-2.99672	5	CL2724	DC	5	2	C301-0399	9	2-{[2-(3-methylphenyl)-5-nitro-3-oxido-2H-1,2,3-triazol-4-yl]amino}ethanol	121.36	O=[N+]([O-])c1c(NCCO)[n+]([O-])n(-c2cc(C)ccc2)n1	112	2.16	2.91	0.29
omega_799124	-8.75734	-11.8791	0.451149	4.48508	3.15973	-2.47227	-2.5019	2		DC	5	2	8016-8528	5	4-bromo-N~1~-(1H-indazol-6-yl)-1-benzenesulfonamide	83.23	Brc1ccc(S(=O)(=O)Nc2cc3[nH]ncc3cc2)cc1	31	2.99	3.4	-4.98
omega_376863	-8.75721	-11.4092	0.268195	4.08995	2.56055	-2.93739	-1.32934	2		DC	3	1	1763-0521	3	N-(2,5-dimethylphenyl)nicotinamide	41.99	O=C(Nc1c(C)ccc(C)c1)c1cnccc1	1	2.79	2.79	-3.45
omega_368925	-8.75687	-10.5132	0.596956	3.2544	4.57412	-4.67943	-1.9897	6		DC	4	2	1514-0633	5	N-Pyridin-3-ylmethyl-phthalamic acid	79.29	O=C(O)c1c(C(=O)NCc2cnccc2)cccc1	23	-2.74	1.08	1.27
omega_1491682	-8.75672	-9.67818	0.615523	3.50821	3.89851	-5.05082	-2.04998	2	CM0272	NC	1	1	P307-0808	5	6-chloro-N-(4-methylbenzyl)imidazo[1,2-b]pyridazine-2-carboxamide	59.29	ClC1=Nn2c(nc(C(=O)NCc3ccc(C)cc3)c2)C=C1	226	3.337	2.384	-2.12
omega_41603	-8.75644	-12.8155	0.569248	5.65049	3.63847	-4.33425	-1.46492	3	CL4403A	DC	4	1	C999-0225	5	N-(4-chlorobenzyl)-2-(5,7-dimethyl-2-phenylpyrazolo[1,5-a]pyrimidin-6-yl)acetamide	59.29	Clc1ccc(CNC(=O)CC2=C(C)n3nc(-c4ccccc4)cc3N=C2C)cc1	179	5.53	4.37	-6.78
omega_536283	-8.75572	-12.226	0.477451	5.27714	2.33169	-1.94858	-2.66743	7		DC	4	2	8003-2796	5	2-(2,6-dimethylphenoxy)-N'~1~-[(E)-1-(2-hydroxy-1-naphthyl)methylidene]acetohydrazide	70.92	O=C(NN=Cc1c(O)ccc2c1cccc2)COc1c(C)cccc1C	69	4.58	4.13	-3.75
omega_875312	-8.75564	-11.7073	0.355519	4.68994	2.73397	-3.41059	-1.41714	2		DC	3	1	Y030-0567	3	N-(2-ethyl-6-methylphenyl)nicotinamide	41.99	O=C(Nc1c(CC)cccc1C)c1cnccc1	49	2.61	2.61	-3.57
omega_1505388	-8.75544	-14.3869	0.633311	6.00573	3.92537	-3.05357	-1.87934	5	CL8338	NC	4	1	P666-1645	7	2-ethyl-N-(2-ethylphenyl)-4-methyl-1-oxo-1,2-dihydropyrrolo[1,2-d][1,2,4]triazine-7-sulfonamide	92.15	S(=O)(=O)(Nc1c(CC)cccc1)c1cn2C(C)=NN(CC)C(=O)c2c1	68	3.533	1.899	-5.15
omega_535306	-8.75524	-9.49788	0.402045	3.50767	5.1085	-5.9653	-2.31027	7		DC	5	2	8003-1279	6	4-chloro-N~1~-(2-oxo-2-{2-[(E)-1-(2-pyridyl)methylidene]hydrazino}ethyl)benzamide	83.45	Clc1ccc(C(=O)NCC(=O)NN=Cc2ncccc2)cc1	1	1.13	2.25	-2.47
omega_284987	-8.75504	-9.08923	0.539536	3.77552	4.67588	-5.4694	-3.18735	4	CL6481	DC	5	1	G205-1134	7	2-azepan-1-yl-N-cyclopropyl-5-oxo-5H-[1,3,4]thiadiazolo[3,2-a]pyrimidine-6-carboxamide	102.67	O=C(NC1CC1)C=1C(=O)N2N=C(N3CCCCCC3)SC2=NC=1	14	3.02	2.26	-1.92
omega_419926	-8.7548	-10.752	0.319234	4.21597	4.64053	-4.50811	-2.67044	5		DC	5	2	3254-4023	6	N'-[(1E)-2-furylmethylene]-3-(5-methyl-2-thienyl)-1H-pyrazole-5-carbohydrazide	83.28	O=C(NN=Cc1occc1)c1[nH]nc(-c2sc(C)cc2)c1	31	3.95	2.77	-2.01
omega_375778	-8.75447	-10.4254	0.227595	4.06175	1.9916	-2.25976	-2.35027	6		DC	3	2	1761-0160	4	2-anilino-N'-[(E)-1-(4-fluorophenyl)methylidene]acetohydrazide	53.49	Fc1ccc(C=NNC(=O)CNc2ccccc2)cc1	206	3.09	2.27	-4.12
omega_795460	-8.75424	-10.8098	0.43741	3.79829	3.53794	-3.58035	-2.1377	1	CL9996	DC	5	1	M867-0083	5	6-(4-methylbenzyl)isothiazolo[4,3-d]pyrimidine-5,7(4H,6H)-dione	90.54	O=C1N(Cc2ccc(C)cc2)C(=O)c2nscc2N1	11	2.8	2.8	-3.98
omega_124438	-8.75396	-12.0905	0.451248	5.14245	4.88044	-3.94423	-3.19335	5	CM0132	DC	5	3	D668-0244	7	N~5~-(2-ethylphenyl)-2-hydroxy-4-methyl-6-oxo-1,6-dihydro-5-pyrimidinesulfonamide	116.24	S(=O)(=O)(Nc1c(CC)cccc1)C1=C(C)N=C(O)NC1=O	141	0.59	0.949	-0.19
omega_1431533	-8.75361	-12.5494	0.533633	4.77289	5.69819	-4.43978	-2.76917	7	CL9020	NC	3	3	L879-0054	6	N-(1H-1,3-benzimidazol-2-yl)-2-{[2-(4-methylphenyl)acetyl]amino}propanamide	86.88	O=C(Nc1[nH]c2c(n1)cccc2)C(NC(=O)Cc1ccc(C)cc1)C	106	0.35	2.74	-1.95
omega_1491666	-8.75358	-10.4935	0.501477	3.90308	3.89836	-4.82081	-1.74219	4	CM0272	NC	5	1	P307-0773	5	6-chloro-N-(4-fluorobenzyl)imidazo[1,2-b]pyridazine-2-carboxamide	59.29	ClC1=Nn2c(nc(C(=O)NCc3ccc(F)cc3)c2)C=C1	121	2.836	2.664	-3.45
omega_539940	-8.75334	-11.5971	0.354375	4.98672	3.33804	-2.82348	-3.01193	9		DC	6	3	8004-0050	7	N~1~-(4-chloro-2-methylphenyl)-2-{2-[(E)-1-(3-ethoxy-4-hydroxyphenyl)methylidene]hydrazino}-2-oxoacetamide	100.02	Clc1cc(C)c(NC(=O)C(=O)NN=Cc2cc(OCC)c(O)cc2)cc1	37	2.2	3.17	-1.83
omega_188840	-8.75317	-12.0261	0.506307	4.91899	3.39091	-3.86695	-1.67637	2	CL1643	DC	5	1	F018-1277	5	3-chloro-N-(5-chloro-2-methylphenyl)pyrazolo[1,5-a]pyrimidine-2-carboxamide	59.29	Clc1c(C(=O)Nc2c(C)ccc(Cl)c2)nn2c1N=CC=C2	1	4.13	4.13	-5.15
omega_481125	-8.75307	-11.1907	0.316859	3.76195	3.20822	-3.0339	-1.81545	5		DC	6	2	4904-4040	6	N'-[(4-fluorophenyl)sulfonyl]-2-furohydrazide	88.41	[SH0](=O)(ONNC(=O)c1occc1)c1ccc(F)cc1	10	0.33	0.62	-1.05
omega_945421	-8.75287	-6.99917	0.216216	2.49452	3.58271	-4.15025	-3.89689	4		DC	5	2	8018-7108	5	ethyl 2-(3-oxo-2,3-dihydro-1H-pyrazol-4-yl)acetate	67.43	O=C(OCC)CC=1C(=O)NNC=1	31	-0.84	-0.81	-0.38
omega_87125	-8.75225	-12.109	0.569358	5.77411	4.2687	-4.36904	-2.8864	5	CL7372	DC	4	2	D351-0211	7	5-{[(2,3-dimethylphenyl)amino]methyl}-2-(4-methoxyphenyl)[1,2,4]triazolo[1,5-a]pyrimidin-7(4H)-one	81.07	O(C)c1ccc(-c2nn3C(=O)C=C(CNc4c(C)c(C)ccc4)Nc3n2)cc1	147	2.31	3.3	-2.49
omega_491384	-8.74989	-10.3333	0.762242	5.05849	2.39924	-4.11966	-2.51685	3		DC	2	2	5511-0461	2	3-[(5-bromothien-2-yl)(1H-indol-3-yl)methyl]-1H-indole	31.58	Brc1sc(C(c2c3c([nH]c2)cccc3)c2c3c([nH]c2)cccc3)cc1	81	6.44	5.06	-7.37
omega_62119	-8.74957	-11.3878	0.34054	3.58122	3.62627	-2.79749	-2.11227	6	CL5013	DC	5	2	D205-0385	7	N-(7-hydroxy-5-propyl[1,2,4]triazolo[1,5-a]pyrimidin-2-yl)-3-methylbenzamide	92.41	O=C(Nc1nn2C(O)=CC(CCC)=Nc2n1)c1cc(C)ccc1	121	1.23	3.71	-1.64
omega_363790	-8.74921	-10.1383	0.239734	2.62501	2.59741	-1.94623	-2.12685	6		DC	4	2	1193-0097	5	ethyl [2-(4-chlorophenyl)hydrazino](oxo)acetate	67.43	Clc1ccc(NNC(=O)C(=O)OCC)cc1	1	2.16	1.54	-1.86
omega_1289580	-8.74902	-11.2971	0.801609	4.62476	3.30136	-4.13785	-2.04177	4	CL7852	NC	5	1	F692-0447	5	N-(3-fluorobenzyl)-7,8-dimethyl-4-oxo-4H-[1,3]thiazino[3,2-a]benzimidazole-2-carboxamide	89.29	Fc1cc(CNC(=O)C=2Sc3n(C(=O)C=2)c2c(n3)cc(C)c(C)c2)ccc1	6	2.75	4.35	-2.87
omega_6380	-8.74873	-10.9234	0.551431	4.09314	5.86938	-4.49617	-3.84308	5	CL1273	DC	7	2	C612-1355	7	3-{[(4-methoxybenzyl)amino]carbonyl}-2-pyrazinecarboxylic acid	101.41	O=C(O)c1c(C(=O)NCc2ccc(OC)cc2)nccn1	1	-2.95	0.2	-1.07
omega_798513	-8.74859	-9.80507	0.531239	3.79692	5.26937	-3.97455	-4.5665	2	CL1387	DC	7	3	8016-7393	7	N~2~-(2,4-dihydroxy-6-methyl-5-pyrimidinyl)-2-thiophenesulfonamide	149.03	S(=O)(=O)(Nc1c(O)nc(O)nc1C)c1sccc1	31	-3.59	-0.0374	-2.25
omega_379743	-8.7485	-13.5322	0.572647	6.20357	2.6044	-1.71087	-2.88605	3	CL3108	DC	3	1	1912-0039	4	5-(Naphthalen-1-ylamino)-3-phenyl-thiazolidine-2,4-dione	49.41	O=C1N(c2ccccc2)C(=O)SC1Nc1c2c(ccc1)cccc2	15	1.78	4.95	-3.49
omega_1447496	-8.7485	-13.5354	0.407766	6.08279	2.99876	-3.54431	-1.15807	5	CL9387	NC	3	1	M056-1058	4	2-[4-(benzylamino)-2-oxoquinazolin-1(2H)-yl]-N-(2-ethylphenyl)acetamide	72.22	S(CC)c1nccc2n(CC(=O)NCc3ccc(CC)cc3)ccc12	18	4.31	3.639	-2.92
omega_953089	-8.74793	-10.1173	0.796756	4.20717	5.68215	-5.50071	-3.81595	4		DC	6	3	Y042-6973	6	N~3~-[2-(1H-1,3-benzimidazol-2-yl)ethyl]-4,5,6,7-tetrahydro-1H-indazole-3-carboxamide	86.46	O=C(NCCc1[nH]c2c(n1)cccc2)c1n[nH]c2c1CCCC2	30	2.36	2.38	-3.71
omega_1474479	-8.74788	-13.5542	0.437937	5.5204	3.15125	-2.32121	-1.9821	5	CL6310	NC	4	2	M830-2218	4	2-({4-[(2,5-dimethylphenyl)sulfonyl]piperazin-1-yl}methyl)-3-(4-methylphenyl)-3H-imidazo[4,5-b]pyridine	82.26	Fc1cc(C)c(NC(=O)c2c(C)nc(Nc3cc(C)ccc3)s2)cc1	73	3.267	5.244	-4.22
omega_343401	-8.74771	-11.5534	0.295054	4.10477	4.0522	-3.3048	-2.34158	4	CL2892	DC	4	3	G801-0027	7	N-(4-acetylphenyl)-2-oxo-2,3-dihydro-1H-benzimidazole-5-sulfonamide	112.75	[SH0]([O+H]c1cc2NC(=O)Nc2cc1)([O-])=Nc1ccc(C(=O)C)cc1	3	0.41	0.92	-2.86
omega_1323519	-8.74749	-12.1178	0.671716	6.23174	4.57617	-4.27494	-3.83439	6	CL7041	NC	4	1	G622-0106	6	1-benzyl-2-oxo-N-(pyridin-2-ylmethyl)-1,2-dihydro-1,8-naphthyridine-3-carboxamide	75.19	O=C(NCc1ncccc1)C=1C(=O)N(Cc2ccccc2)c2ncccc2C=1	114	2.42	2.25	-4.11
omega_1300190	-8.74739	-12.8538	0.432084	5.30633	4.19788	-4.24239	-1.58746	2	CL8429	NC	4	1	F937-1778	4	N-(4-fluorobenzyl)-4-methyl-2-phenylpyrimidine-5-carboxamide	54.88	Fc1ccc(CNC(=O)c2c(C)nc(-c3ccccc3)nc2)cc1	1	3.15	2.95	-5.66
omega_1475566	-8.74727	-12.4996	0.391206	4.12796	3.70615	-3.4508	-1.02219	4	CM0005	NC	8	0	M876-0519	6	3-(3-chlorophenyl)-5-{[5-(3-fluoro-4-methylphenyl)-1,3,4-oxadiazol-2-yl]methyl}-1,2,4-oxadiazole	77.84	Clc1cc(-c2nc(Cc3oc(-c4cc(F)c(C)cc4)nn3)on2)ccc1	127	2.649	4.242	-6.03
omega_554147	-8.74717	-9.7251	0.282823	3.02061	4.54786	-4.19961	-2.67375	5		DC	6	3	8006-9309	6	N-(2-oxo-2-{2-[(E)-1-(1H-pyrrol-2-yl)methylidene]hydrazino}ethyl)-2-thiophenecarboxamide	114.59	O=C(N/N=C/c1[nH]ccc1)CNC(=O)c1sccc1	3	1.91	1.91	-3.56
omega_1003759	-8.74674	-9.66042	0.365896	4.67368	3.1363	-4.19964	-3.06255	3	CM3040	IC	7	1	S632-4980	7	{3-[1-(methylsulfonyl)-4-piperidyl]-1-pyrrolidinyl}(1H-pyrazol-4-yl)methanone	94.75	S(=O)(=O)(C)N1CCC(C2CN(C(=O)c3c[nH]nc3)CC2)CC1	22	-0.0925	-0.0925	-2.63
omega_1310750	-8.74672	-13.5069	0.5146	5.15438	4.18463	-3.64633	-1.44708	3	CL6766	NC	5	1	G293-0175	5	N-mesityl-2-([1,3]oxazolo[4,5-b]pyridin-2-ylthio)propanamide	93.32	S(C(C(=O)Nc1c(C)cc(C)cc1C)C)c1oc2c(n1)nccc2	1	2.02	4.325	-3.34
omega_600733	-8.74606	-13.1329	0.431743	5.09164	2.68704	-0.824217	-2.99939	3		DC	4	2	8015-7051	4	4,5-dichloro-2-[(3-fluoro-2-methylanilino)carbonyl]benzoic acid	66.4	Clc1c(Cl)cc(C(=O)Nc2c(C)c(F)ccc2)c(C(=O)O)c1	31	-0.42	2.71	-5.51
omega_107051	-8.74595	-13.548	0.519029	5.39519	4.61047	-4.22317	-1.49948	4	CL6729A	DC	4	1	D458-0626	6	N-benzyl-2-(2-cyclohexyl-5,7-dimethyl[1,2,4]triazolo[1,5-a]pyrimidin-6-yl)acetamide	72.18	O=C(NCc1ccccc1)CC1=C(C)n2nc(C3CCCCC3)nc2N=C1C	137	3.93	3.71	-4.19
omega_147070	-8.74594	-11.0658	0.591616	4.70104	2.52425	-3.35387	-2.14313	2	CL4819	DC	4	0	E243-0099	4	3-(3-chlorobenzyl)[1]benzofuro[3,2-d]pyrimidin-4(3H)-one	45.81	Clc1cc(CN2C(=O)c3oc4c(c3N=C2)cccc4)ccc1	196	2.93	3.13	-4.37
omega_446080	-8.74538	-12.3093	0.58252	4.96811	3.6834	-3.19214	-2.47796	8	CL0774	DC	6	1	3909-7631	7	ethyl 3-[2-(benzylamino)-2-oxoethyl]-2,5-dimethyl-4-oxo-3,4-dihydrothieno[2,3-d]pyrimidine-6-carboxylate	88.07	O=C(NCc1ccccc1)CN1C(C)=Nc2sc(C(=O)OCC)c(C)c2C1=O	2	1.69	2.63	-0.58
omega_536432	-8.74511	-12.4539	0.295352	4.60099	3.417	-2.25667	-2.34784	6		DC	7	2	8003-3107	7	2-{2-[(E)-1-(3,4-dimethoxyphenyl)methylidene]hydrazino}-N-(2,6-dimethylphenyl)-2-oxoacetamide	89.02	O=C(N/N=C/c1cc(OC)c(OC)cc1)C(=O)Nc1c(C)cccc1C	28	2.32	2.32	-3.71
omega_1012582	-8.74462	-12.0103	0.268027	5.08451	1.45132	-2.4095	-1.12872	3	CM4363	IC	4	0	S694-1433	4	4-[1-(1-cyclopentyltetrahydro-1H-pyrrol-3-yl)-5-methyl-1H-imidazol-2-yl]pyridine	33.95	Cc1n(c(-c2ccncc2)nc1)C1CN(C2CCCC2)CC1	30	-0.0981	2.09	-3.28
omega_600244	-8.7445	-11.2967	0.691883	5.61803	4.13511	-4.00739	-3.88541	3		DC	5	2	8015-6489	5	N~1~-(bicyclo[2.2.1]hept-2-ylmethyl)-4-oxo-3,4-dihydro-1-phthalazinecarboxamide	70.56	O=C(NCC1C2CC(C1)CC2)C1=NNC(=O)c2c1cccc2	31	3.41	3.41	-4.68
omega_62093	-8.74424	-11.3466	0.601679	4.65093	4.59355	-4.22792	-3.01589	4		DC	6	1	D205-0350	8	2-(6-benzyl-7-hydroxy-5-methyl[1,2,4]triazolo[1,5-a]pyrimidin-2-yl)-1H-isoindole-1,3(2H)-dione	100.69	O=C1N(c2nn3C(O)=C(Cc4ccccc4)C(C)=Nc3n2)C(=O)c2c1cccc2	237	0.66	4.52	-3.04
omega_34759	-8.744	-12.7904	0.495926	5.38899	2.27004	-2.54815	-1.56041	4	CL4011	DC	4	1	C859-0107	4	N-(2-ethylphenyl)-4-methyl-2-(1H-pyrrol-1-yl)-1,3-thiazole-5-carboxamide	75.16	O=C(Nc1c(CC)cccc1)c1c(C)nc(-n2cccc2)s1	2	2.86	2.86	-4.16
omega_389628	-8.74359	-10.9239	0.505932	4.66516	2.81791	-3.1651	-2.64358	6		DC	5	2	2181-0109	5	N'-[(E)-1-(4,5-dibromo-2-furyl)methylidene]-2-(2-naphthylamino)acetohydrazide	66.63	Brc1c(Br)cc(C=NNC(=O)CNc2cc3c(cc2)cccc3)o1	3	3.73	4.25	-4.6
omega_284882	-8.74332	-10.0676	0.581751	4.13633	4.82644	-5.13868	-3.08153	5	CL6481	DC	9	1	G205-0689	9	N-[2-(1-azepanyl)ethyl]-2-morpholino-5-oxo-5H-[1,3,4]thiadiazolo[3,2-a]pyrimidine-6-carboxamide	115.14	O=C(NCCN1CCCCCC1)C=1C(=O)N2N=C(N3CCOCC3)SC2=NC=1	1	-0.77	0.61	-3.83
omega_379293	-8.74331	-12.8304	0.398041	5.09189	4.52523	-3.92658	-2.00145	4		DC	3	2	1897-1410	9	2-(1H-indol-3-yl)-N'-[(1E)-1-methyl-2-(5-methyl-3-nitro-1H-pyrazol-1-yl)ethylidene]acetohydrazide	120.89	O=[N+]([O-])c1nn(CC(=NNC(=O)Cc2c3c([nH]c2)cccc3)C)c(C)c1	115	1.76	2.51	-2.81
omega_87145	-8.74301	-13.3363	0.461553	5.50921	4.11184	-3.05491	-2.43444	5	CL7372	DC	3	2	D351-0311	6	2-(4-tert-butylphenyl)-5-{[(3-methylphenyl)amino]methyl}[1,2,4]triazolo[1,5-a]pyrimidin-7(4H)-one	71.84	O=C1n2nc(-c3ccc(C(C)(C)C)cc3)nc2NC(CNc2cc(C)ccc2)=C1	165	2.21	4.23	-4.1
omega_1322956	-8.7429	-12.4605	0.770514	4.46441	3.07035	-4.00771	-0.579942	4	CL6074	NC	5	0	G607-0898	6	6-methyl-1-propyl-3-(3-pyridin-2-yl-1,2,4-oxadiazol-5-yl)quinolin-4(1H)-one	72.12	O=C1C(c2onc(-c3ncccc3)n2)=CN(CCC)c2c1cc(C)cc2	49	1.15	3.48	-3.39
omega_1234040	-8.7424	-9.47026	0.449835	3.37076	3.73339	-3.75189	-3.07424	5	CL2813A	NC	4	1	D358-0115	5	N-(1-methylbutyl)-5-oxo-5H-[1,3]thiazolo[3,2-a]pyrimidine-6-carboxamide	87.07	O=C(NC(CCC)C)C=1C(=O)N2C(SC=C2)=NC=1	156	1.8	0.76	-4.11
omega_353381	-8.74238	-9.91159	0.234441	3.65848	1.99716	-1.52498	-3.19589	3		DC	3	4	0325-0375	4	3-hydroxynaphthalene-2-carbohydrazide	75.35	O=C(NN)c1c(O)cc2c(c1)cccc2	165	0.98	1.38	-0.21
omega_1475618	-8.74203	-12.5188	0.416137	4.11211	3.71262	-3.45642	-1.00769	4	CM0005	NC	7	0	M876-0788	6	2-{[3-(3-chlorophenyl)-1,2,4-oxadiazol-5-yl]methyl}-5-(3,4-dimethylphenyl)-1,3,4-oxadiazole	77.84	Clc1cc(-c2nc(Cc3oc(-c4cc(C)c(C)cc4)nn3)on2)ccc1	165	3.447	4.523	-5.59
omega_1449908	-8.74191	-12.4827	0.472799	4.38285	3.0041	-2.61856	-1.50039	4	CL9502	NC	6	2	M100-0035	6	N-(4-chloro-2-methylphenyl)-4-(6-oxo-1,6-dihydropyridazin-3-yl)thiophene-2-sulfonamide	124.25	Clc1cc(C)c(NS(=O)(=O)c2scc(C3=NNC(=O)C=C3)c2)cc1	109	2.965	2.709	-2.49
omega_478007	-8.74179	-13.2217	0.547894	5.14632	1.96629	-1.43669	-1.74392	5	CL2165	DC	3	2	4729-0763	5	3-[2-(1H-Indol-3-yl)-ethylamino]-1-p-tolyl-pyrrolidine-2,5-dione	65.2	O=C1N(c2ccc(C)cc2)C(=O)CC1NCCc1c2c([nH]c1)cccc2	2	-1.43	3.56	-2.17
omega_1277173	-8.74177	-11.2541	0.728048	5.09242	3.19609	-4.38688	-2.11736	3	CL8006	NC	6	0	F387-0042	6	3-{[5-(3-chlorophenyl)-1,2,4-oxadiazol-3-yl]methyl}-2-methyl-4(3H)-quinazolinone	71.59	Clc1cc(-c2onc(CN3C(C)=Nc4c(C3=O)cccc4)n2)ccc1	185	1.44	2.87	-2.79
omega_1470664	-8.74174	-12.6124	0.436424	5.03629	2.8573	-2.82477	-1.63463	3	CL9870	NC	5	1	M710-0742	5	N-(3-chloro-2-methylphenyl)-6-pyrimidin-5-ylnicotinamide	67.77	Clc1c(C)c(NC(=O)c2cnc(-c3cncnc3)cc2)ccc1	5	3.07	3.07	-4.46
omega_179254	-8.74157	-13.5902	0.870862	7.61314	4.01667	-5.2637	-2.38829	5	CL3599	DC	3	1	E902-0047	6	3-[2-(4-benzylpiperidin-1-yl)-2-oxoethyl]-8-methyl-3,5-dihydro-4H-pyridazino[4,5-b]indol-4-one	68.77	O=C(CN1C(=O)c2[nH]c3c(c2C=N1)cc(C)cc3)N1CCC(Cc2ccccc2)CC1	88	2.56	4.05	-2.31
omega_1292996	-8.74076	-12.7884	0.663292	5.46625	4.43672	-3.26537	-3.25329	4	CL8376	NC	3	4	F796-0273	6	2-(8-fluoro-4-oxo-4,5-dihydro-3H-pyrimido[5,4-b]indol-3-yl)-N-(4-methylcyclohexyl)acetamide	77.56	Fc1cc2c([nH]c3C(=O)N(CC(=O)NC4CCC(C)CC4)C=Nc23)cc1	50	2.43	3.35	-5.56
omega_1500265	-8.7407	-11.2242	0.321374	4.03822	3.99173	-3.33679	-2.531	5	CM0615A	NC	3	3	P574-2734	6	2-(2-amino-4-methyl-6-oxopyrimidin-1(6H)-yl)-N-benzylacetamide	87.79	O=C(NCc1ccccc1)CN1C(N)=NC(C)=CC1=O	20	1.116	0.824	0.95
omega_148575	-8.74069	-13.5513	0.279121	4.2135	3.20174	-1.10697	-1.77677	4		DC	5	2	E466-0007	6	N-(3-chlorophenyl)-N'-4H-chromeno[3,4-d]isoxazol-3-ylurea	76.39	Clc1cc(NC(=O)Nc2noc3-c4c(OCc23)cccc4)ccc1	68	3.74	3.73	-4.64
omega_968021	-8.74052	-11.6687	0.5139	4.52109	4.26975	-4.78071	-1.59581	4	CM1206	IC	6	3	P806-0443	6	N-[1-(3-phenyl-1H-pyrazol-5-yl)piperidin-3-yl]-1H-indole-2-carboxamide	76.81	O=C(NC1CN(c2[nH]nc(-c3ccccc3)c2)CCC1)c1[nH]c2c(c1)cccc2	79	4.2596	5.16	-5.5009
omega_128362	-8.7404	-11.5131	0.44618	3.85347	2.99571	-3.54731	-0.975379	4		DC	4	1	D717-0001	5	N-benzyl-6-bromopyrazolo[1,5-a]pyrimidine-2-carboxamide	59.29	BrC1=Cn2nc(C(=O)NCc3ccccc3)cc2N=C1	15	2.244	2.333	-3.33
omega_282009	-8.74028	-9.91225	0.559568	4.37749	5.66179	-6.05081	-3.37607	2	CL6077	DC	3	3	G192-0323	6	2-{5-[3-(4-isopropylphenyl)-1H-pyrazol-5-yl]-1,2,4-oxadiazol-3-yl}pyridine	80.49	C(C)(C)c1ccc(-c2n[nH]c(-c3onc(-c4ncccc4)n3)c2)cc1	10	2.14	4.12	-2.78
omega_354297	-8.74027	-12.2245	0.469855	4.06114	2.59588	-1.6561	-1.98655	3		DC	5	2	0422-0138	5	4-methyl-N'-(8-quinolyl)-1-benzenesulfonohydrazide	79.47	S(=O)(=O)(NNc1c2ncccc2ccc1)c1ccc(C)cc1	1	3.27	3.31	-4.27
omega_585163	-8.74006	-12.3953	0.455245	4.94469	2.99905	-3.5084	-1.23538	4		DC	3	1	8013-1160	3	2,6-dichloro-4-methyl-N~3~-phenethylnicotinamide	41.99	Clc1c(C(=O)NCCc2ccccc2)c(C)cc(Cl)n1	36	3.09813	2.81	-5.3384
omega_274951	-8.73988	-9.59174	0.483616	4.76329	5.2605	-5.96454	-3.691	4		DC	6	5	FF01-0545	6	N-cyclohexyl-5-(hydrazinocarbonyl)-2,4-dimethyl-1H-pyrrole-3-carboxamide	100.01	O=C(NC1CCCCC1)c1c(C)c(C(=O)NN)[nH]c1C	497	0.7	0.7	-2.17
omega_884339	-8.73985	-11.9443	0.416145	5.02614	2.79752	-3.76653	-1.26878	4		DC	3	1	Y031-0094	3	2-(2-chloro-6-fluorophenyl)-N-(4-pyridylmethyl)acetamide	41.99	Clc1c(CC(=O)NCc2ccncc2)c(F)ccc1	47	2.33	2.33	-3.27
omega_124457	-8.73977	-11.5507	0.480647	5.23083	4.90342	-4.00244	-3.80155	4	CM0132	DC	7	3	D668-0269	7	N~5~-(2,4-difluorophenyl)-2-hydroxy-4-methyl-6-oxo-1,6-dihydro-5-pyrimidinesulfonamide	116.24	S(=O)(=O)(Nc1c(F)cc(F)cc1)C1=C(C)N=C(O)NC1=O	145	0.25	0.418	-0.32
omega_943196	-8.73907	-9.74259	0.472478	4.01435	5.32999	-4.55947	-4.25383	3		DC	9	3	8017-8082	9	4'-nitro-1H,1'H,1''H-4,3':5',4''-terpyrazole	131.86	O=[N+]([O-])c1c(-c2c[nH]nc2)[nH]nc1-c1c[nH]nc1	31	0.47	0.8	-4.5
omega_127244	-8.7384	-11.3342	0.313782	4.3523	4.53587	-3.70268	-2.90351	6		DC	5	3	D715-0775	5	2-{[3-(1H-indol-3-yl)propanoyl]amino}butanoic acid	82.19	O=C(O)C(NC(=O)CCc1c2c([nH]c1)cccc2)CC	22	-2.46	1.12	-2.3
omega_120065	-8.73822	-12.7516	0.707673	4.98119	4.59261	-4.21531	-2.05274	5	CL9436	DC	4	1	D579-0111	6	N-mesityl-2-(3-oxo-5-phenyl-1,2,4-triazin-2(3H)-yl)propanamide	74.13	O=C(Nc1c(C)cc(C)cc1C)C(C)N1C(=O)N=C(c2ccccc2)C=N1	90	2.86	4.81	-2.25
omega_1361389	-8.7382	-10.9418	0.699759	4.37787	3.35541	-4.34698	-1.88249	3		NC	5	1	K823-0094	5	N-(4-fluorobenzyl)-2,3,5-trimethyl-4-oxo-3,4-dihydrothieno[2,3-d]pyrimidine-6-carboxamide	90.01	Fc1ccc(CNC(=O)c2c(C)c3C(=O)N(C)C(C)=Nc3s2)cc1	4	1.58	1.58	-3.63
omega_398613	-8.73797	-12.0768	0.377046	4.35476	2.50801	-1.78335	-2.1176	8		DC	3	2	2425-3320	4	N'-[(1E,2E)-3,7-dimethylocta-2,6-dienylidene]-3-hydroxy-2-naphthohydrazide	61.69	O=C(NN=CC=C(CCC=C(C)C)C)c1c(O)cc2c(c1)cccc2	140	4.93	4.82	-3.66
omega_546854	-8.73767	-11.255	0.282533	4.2584	2.50333	-2.88052	-1.64639	6		DC	6	1	8005-4634	5	2-(2-bromo-4-chlorophenoxy)-N'~1~-[(E)-1-(2-furyl)methylidene]acetohydrazide	63.83	Brc1c(OCC(=O)NN=Cc2occc2)ccc(Cl)c1	22	2.82	3.33	-4.15
omega_107111	-8.73716	-12.6203	0.579781	4.9512	4.79718	-4.41751	-2.02748	4	CL6729A	DC	4	1	D458-0743	6	2-(5,7-dimethyl-2-propyl[1,2,4]triazolo[1,5-a]pyrimidin-6-yl)-N-(4-methylphenyl)acetamide	72.18	O=C(Nc1ccc(C)cc1)CC1=C(C)n2nc(CCC)nc2N=C1C	21	3.21	3.19	-3.26
omega_1465080	-8.73706	-12.0188	0.362486	4.54216	3.46305	-3.52408	-1.56183	3	CL9685	NC	4	2	M508-0538	4	N-cycloheptyl-2-(1H-pyrrolo[2,3-b]pyridin-3-yl)acetamide	57.78	O=C(NC1CCCCCC1)Cc1c2c([nH]c1)nccc2	2	2.66	2.66	-2.84
omega_1531863	-8.73702	-11.5996	0.485565	5.72205	2.99862	-3.69442	-2.64924	3	CL5757	NC	4	1	Z601-0786	4	N~2~-cyclopropyl-3-(1H-pyrrol-1-yl)thieno[2,3-c]pyridine-2-carboxamide	75.16	O=C(NC1CC1)c1c(-n2cccc2)c2c(s1)cncc2	3	1.62	1.62	-3.5
omega_289788	-8.73643	-13.2118	0.390148	5.71688	3.50416	-3.46001	-1.67583	4	CL6659	DC	6	0	G265-0019	6	(2-methyl-5-oxo-5H-[1,3,4]thiadiazolo[3,2-a]pyrimidin-7-yl)methyl 2-methylbenzoate	96.63	O=C(OCC=1N=C2SC(C)=NN2C(=O)C=1)c1c(C)cccc1	45	1.41	2.55	-3.46
omega_1291818	-8.73643	-13.9468	0.434281	5.43547	3.9021	-1.84277	-2.71874	5	CL8342	NC	4	2	F731-0287	6	N-(8-chloro-11-oxo-10,11-dihydrodibenzo[b,f][1,4]oxazepin-2-yl)-2-ethoxybenzamide	76.66	Clc1cc2NC(=O)c3c(Oc2cc1)ccc(NC(=O)c1c(OCC)cccc1)c3	113	3.97	4.41	-5.66
omega_1004641	-8.73642	-9.71349	0.28932	3.79088	4.46036	-4.1043	-3.45919	2	CM4193	IC	6	1	S636-0309	6	7-[(5-bromo-2-furyl)methyl]-2,5,6,7,8,9-hexahydro-3H-[1,2,4]triazolo[4,3-d][1,4]diazepin-3-one	61.08	Brc1oc(CN2CCN3C(=O)NN=C3CC2)cc1	6	0.0898	0.4	-2.59
omega_476501	-8.73623	-9.27944	0.429301	3.1728	3.90178	-3.49931	-3.46136	5		DC	4	3	4632-6944	5	5-chloro-2-hydroxy-N'-[(1E)-1H-pyrrol-2-ylmethylene]benzohydrazide	77.48	Clc1cc(C(=O)NN=Cc2[nH]ccc2)c(O)cc1	119	2.38	2.47	0.37
omega_41602	-8.73565	-12.1441	0.513908	5.62485	3.89515	-4.85353	-1.77189	6	CL4403A	DC	3	1	C999-0224	5	N-(sec-butyl)-2-(5,7-dimethyl-2-phenylpyrazolo[1,5-a]pyrimidin-6-yl)acetamide	59.29	O=C(NC(CC)C)CC1=C(C)n2nc(-c3ccccc3)cc2N=C1C	16	2.88	3.37	-3.25
omega_141892	-8.7355	-14.5706	0.648294	6.46669	3.56794	-2.27763	-2.57024	3	CL3659	DC	3	1	E200-0096	6	5-(3,4-dihydroquinolin-1(2H)-ylcarbonyl)-3-(4-methylphenyl)pyrimidine-2,4(1H,3H)-dione	69.72	O=C(N1c2c(cccc2)CCC1)C=1C(=O)N(c2ccc(C)cc2)C(=O)NC=1	15	3.71	3.36	-3.95
omega_538265	-8.73544	-11.9729	0.42145	5.0689	2.54912	-3.03388	-1.7681	7		DC	8	1	8003-6699	6	N'-[(1E)-(5-bromo-2-furyl)methylene]-2-(2,4-dibromo-6-methoxyphenoxy)acetohydrazide	73.06	Brc1c(OCC(=O)NN=Cc2oc(Br)cc2)c(OC)cc(Br)c1	10	3.9752	4.5228	-5.6296
omega_392770	-8.73517	-12.0176	0.391164	5.96327	3.35882	-2.61582	-3.81502	10		DC	5	3	2262-3580	6	N-(3-{[(2E)-2-(3-allyl-2-hydroxybenzylidene)hydrazino]carbonyl}phenyl)-3-bromobenzamide	90.79	Brc1cc(C(=O)Nc2cc(C(=O)NN=Cc3c(O)c(CC=C)ccc3)ccc2)ccc1	97	3.03	4.96	-1.69
omega_47046	-8.73469	-12.1241	0.43017	4.54512	4.25475	-3.72903	-2.11164	5	CL2653	DC	4	1	D043-0129	6	6-benzyl-5-methyl-2-(phenoxymethyl)[1,2,4]triazolo[1,5-a]pyrimidin-7(4H)-one	69.04	O(Cc1nn2C(=O)C(Cc3ccccc3)=C(C)Nc2n1)c1ccccc1	1	2.26	3.39	-2.4
omega_796185	-8.73428	-12.9187	0.360857	5.13571	2.37221	-2.40785	-1.27652	2		DC	5	1	8016-5918	5	1,3-dimethyl-N~4~-[3-(trifluoromethyl)phenyl]-1H-pyrazole-4-sulfonamide	72.37	S(=O)(=O)(Nc1cc(C(F)(F)F)ccc1)c1c(C)nn(C)c1	31	1.15	1.68	-4.04
omega_389790	-8.73401	-12.5198	0.293147	4.88608	2.832	-1.86458	-2.36084	7		DC	3	3	2181-1113	5	N'-[(E)-1-(2-hydroxy-5-methylphenyl)methylidene]-2-(1-naphthylamino)acetohydrazide	73.72	O=C(NN=Cc1c(O)ccc(C)c1)CNc1c2c(ccc1)cccc2	127	3.39	3.19	-2.95
omega_1004658	-8.73382	-9.09936	0.521981	3.80986	3.9603	-4.46084	-3.46576	2	CM4193	IC	7	1	S636-0470	7	7-[(5-chloro-2-thienyl)sulfonyl]-2,5,6,7,8,9-hexahydro-3H-[1,2,4]triazolo[4,3-d][1,4]diazepin-3-one	118.7	Clc1sc(S(=O)(=O)N2CCN3C(=O)NN=C3CC2)cc1	106	1.99	2.04	-4.61
omega_22485	-8.73359	-11.5619	0.565699	4.55778	4.07366	-4.20072	-2.16812	5	CL3531	DC	4	1	C720-0152	6	N-(4-methoxybenzyl)-8-methyl-4-oxo-4H-pyrido[1,2-a]pyrimidine-3-carboxamide	71	O=C(NCc1ccc(OC)cc1)C=1C(=O)N2C(=NC=1)C=C(C)C=C2	37	2.32	0.84	-2.91
omega_548916	-8.73348	-11.5472	0.321745	4.14159	2.64148	-1.89758	-2.39351	5		DC	6	2	8005-7783	6	N'~6~-[(E)-1-(2-hydroxy-5-iodophenyl)methylidene]-2,3-dihydro-1,4-benzodioxine-6-carbohydrazide	80.15	Ic1cc(C=NNC(=O)c2cc3OCCOc3cc2)c(O)cc1	27	1.54	2.78	-3.06
omega_1474618	-8.73342	-13.3966	0.405098	5.25521	3.14898	-2.36974	-1.77638	5	CL6310	NC	4	2	M830-6404	4	N-(2,4-dimethylphenyl)-2-[(3-fluorophenyl)amino]-4-methyl-1,3-thiazole-5-carboxamide	82.26	Fc1cc(Nc2sc(C(=O)Nc3c(C)cc(C)cc3)c(C)n2)ccc1	110	3.401	5.244	-4.15
omega_1487333	-8.73338	-11.7935	0.673609	4.44402	4.19007	-2.41091	-3.83666	5	CM0213	NC	5	3	P163-0716	5	N-(3-ethoxybenzyl)-2-(4-oxo-2-piperidin-1-ylthieno[3,2-d]pyrimidin-3(4H)-yl)acetamide	106.67	Fc1ccc(C(NC(=O)C=2C(=O)Nc3c(C=2O)scc3)C)cc1	55	1.381	1.75	-2.57
omega_137416	-8.7325	-11.3699	0.445559	3.94024	3.52875	-2.82184	-2.4553	3	CL4356	DC	4	3	E138-2078	5	2-amino-5-bromo-N-(2-methylphenyl)pyridine-3-sulfonamide	93.46	Brc1cc([O+H][SH0]([O-])=Nc2c(C)cccc2)c(N)nc1	90	2.11	2.19	-2.94
omega_552860	-8.73176	-8.5051	0.220926	2.80556	4.17153	-5.08642	-2.33825	2	CL1373	DC	3	2	8006-6695	3	5-benzyl-2,4-dihydro-3H-1,2,4-triazole-3-thione	68.51	S=C1NC(Cc2ccccc2)=NN1	28	1.05	1.06	-2.08
omega_87177	-8.73119	-12.1124	0.625565	5.34265	4.12062	-3.83689	-2.87072	4	CL7372	DC	3	2	D351-0428	6	2-(2-methylphenyl)-5-{[(4-methylphenyl)amino]methyl}[1,2,4]triazolo[1,5-a]pyrimidin-7(4H)-one	71.84	O=C1n2nc(-c3c(C)cccc3)nc2NC(CNc2ccc(C)cc2)=C1	114	0.71	3.32	-2.59
omega_366322	-8.73096	-8.63815	0.677625	3.9493	5.09068	-5.69269	-4.11772	2		DC	2	3	1355-0118	5	6-p-Tolylamino-1H-pyrimidine-2,4-dione	70.23	O=C1NC(=O)C=C(Nc2ccc(C)cc2)N1	1	-0.26	1.68	1.44
omega_555622	-8.73085	-11.2494	0.339275	4.56372	3.59571	-4.17572	-1.80447	6		DC	6	1	8007-2739	5	2-(1,3-benzothiazol-2-ylsulfanyl)-N'~1~-[(E)-1-(2-pyridyl)methylidene]acetohydrazide	67.24	S(CC(=O)NN=Cc1ncccc1)c1sc2c(n1)cccc2	72	1.32	3.87	-2.74
omega_1289487	-8.73084	-11.9305	0.694475	4.90554	2.9688	-3.03345	-2.3357	3	CL7852	NC	5	1	F692-0025	5	N-(4-chloro-2-methylphenyl)-4-oxo-4H-[1,3]thiazino[3,2-a]benzimidazole-2-carboxamide	89.29	Clc1cc(C)c(NC(=O)C=2Sc3n(C(=O)C=2)c2c(n3)cccc2)cc1	135	2.94	4.31	-4.32
omega_594687	-8.73016	-11.4417	0.360209	4.41941	7.07865	-2.73362	-6.4131	5		DC	10	5	8014-8811	10	9-[3,4-dihydroxy-5-(hydroxymethyl)tetrahydro-2-furanyl]-9H-purine-2,6-diol	153.98	OCC1C(O)C(O)C(n2c3nc(O)nc(O)c3nc2)O1	31	-5.27	-1.77	-2.04
omega_124355	-8.73005	-8.57968	0.377364	3.44025	5.24068	-5.3252	-3.88347	4	CM0132	DC	6	3	D668-0058	7	N-(4-bromophenyl)-2-hydroxy-6-oxo-1,6-dihydropyrimidine-5-sulfonamide	116.24	Brc1ccc(NS(=O)(=O)C=2C(=O)NC(O)=NC=2)cc1	166	0.13	0.242	-2.11
omega_1314116	-8.7297	-12.37	0.486417	5.51396	3.59022	-3.49203	-2.45822	7	CL6985	NC	4	1	G374-0864	6	N-butyl-2-[2-(4-chlorophenyl)-4-oxo-6,7-dihydropyrazolo[1,5-a]pyrazin-5(4H)-yl]acetamide	67.23	Clc1ccc(-c2nn3c(C(=O)N(CC(=O)NCCCC)CC3)c2)cc1	18	3.26	3	-3.29
omega_351854	-8.72944	-14.1783	0.570282	6.01671	1.94489	-1.17736	-1.90563	3	CL0699	DC	3	1	0163-0046	4	N-(9,10-dioxo-9,10-dihydroanthracen-1-yl)-3-methylbenzamide	63.24	O=C(Nc1c2C(=O)c3c(C(=O)c2ccc1)cccc3)c1cc(C)ccc1	122	3.39	4.34	-3.01
omega_279870	-8.72919	-11.7695	0.440233	4.59661	3.44809	-2.692	-2.75258	3	CL3447	DC	5	2	G072-0025	5	7-{[(2-aminophenyl)thio]methyl}-2-methyl-5H-[1,3,4]thiadiazolo[3,2-a]pyrimidin-5-one	121.65	S(CC=1N=C2SC(C)=NN2C(=O)C=1)c1c(N)cccc1	1	1.32	2	-4.8
omega_140495	-8.72888	-13.8223	0.410133	5.18873	4.1049	-2.52306	-2.08728	3	CL4657	DC	7	1	E157-3315	8	N-[3-(3-methoxyphenyl)[1,2,4]triazolo[3,4-b][1,3,4]thiadiazol-6-yl]-2-furamide	122.79	O=C(NC=1Sc2n(c(-c3cc(OC)ccc3)nn2)N=1)c1occc1	180	1.71	2.52	-1.89
omega_1291788	-8.72822	-13.9225	0.398712	5.70953	3.62077	-2.31076	-2.22393	5	CL8342	NC	4	2	F731-0208	6	2-ethoxy-N-(8-methyl-11-oxo-10,11-dihydrodibenzo[b,f][1,4]oxazepin-2-yl)benzamide	76.66	O=C(Nc1cc2C(=O)Nc3c(Oc2cc1)ccc(C)c3)c1c(OCC)cccc1	108	3.77	4.12	-5.02
omega_1474399	-8.72789	-13.311	0.419593	5.1827	3.15687	-2.21851	-1.95752	5	CL6310	NC	4	2	M830-1960	4	N-(2-methoxy-5-methylphenyl)-1-{[4-(5-methyl-1,2,4-oxadiazol-3-yl)-2-thienyl]sulfonyl}piperidine-3-carboxamide	82.26	Clc1cc(C)c(NC(=O)c2c(C)nc(Nc3ccccc3)s2)cc1	68	4.835	5.217	-4.79
omega_15047	-8.72785	-12.7369	0.543288	5.10386	3.53848	-3.31259	-1.86395	5	CL3446	DC	5	0	C679-3566	5	7-[(2,3-dimethylphenoxy)methyl]-2-propyl-5H-[1,3,4]thiadiazolo[3,2-a]pyrimidin-5-one	79.56	O(CC=1N=C2SC(CCC)=NN2C(=O)C=1)c1c(C)c(C)ccc1	120	3.25	4.29	-1.86
omega_1384152	-8.7277	-12.6889	0.659964	5.5027	3.29994	-3.22551	-2.27593	6	CL8572A	NC	4	1	L326-0083	5	N-(2-chlorobenzyl)-1-[5-(3-methylphenyl)-2-pyrimidinyl]-4-piperidinecarboxamide	58.12	Clc1c(CNC(=O)C2CCN(c3ncc(-c4cc(C)ccc4)cn3)CC2)cccc1	43	4.81	4.67	-4.54
omega_385063	-8.7271	-12.8894	0.427368	5.26095	1.78824	-1.67316	-1.64106	6		DC	2	1	2072-0660	3	N-1,2-dihydroacenaphthylen-5-yl-3-propoxybenzamide	38.33	O=C(Nc1c2c3c(cc1)CCc3ccc2)c1cc(OCCC)ccc1	34	5.55	4.98	-5.22
omega_1013073	-8.72641	-13.4683	0.695835	6.38487	3.15205	-2.95283	-2.53804	5	CM4365	IC	6	1	S696-0377	6	2-(1H-indol-3-yl)-1-{3-[(5-methyl-2-tetrahydro-2H-pyran-4-yl-1H-imidazol-1-yl)methyl]-1-azetanyl}-1-ethanone	63.15	O=C(Cc1c2c([nH]c1)cccc2)N1CC(Cn2c(C3CCOCC3)ncc2C)C1	7	1.29	1.6	-4.08
omega_330173	-8.72614	-13.4798	0.574364	5.78896	2.42781	-2.77346	-1.26405	4	CL3030	DC	4	1	G677-0111	4	6-(4-fluorophenyl)-N-mesityl-3-methylimidazo[2,1-b][1,3]thiazole-2-carboxamide	74.64	Fc1ccc(-c2nc3SC(C(=O)Nc4c(C)cc(C)cc4C)=C(C)n3c2)cc1	53	5.11	4.81	-6.14
omega_124881	-8.72579	-10.4721	0.693458	5.03951	4.79376	-5.43439	-3.34598	5	CL1351	DC	2	3	D675-0021	7	N-(4-fluorobenzyl)-N-(pyridin-2-ylmethyl)-1H-imidazole-4,5-dicarboxamide	99.77	Fc1ccc(CNC(=O)c2c(C(=O)NCc3ncccc3)[nH]cn2)cc1	124	1.19	0.62	0.77
omega_930236	-8.72574	-13.8326	0.516686	5.74214	4.142	-3.81533	-1.4787	5		DC	6	1	Y200-0587	6	ethyl 2-[(2-pyrazinylcarbonyl)amino]-1-benzothiophene-3-carboxylate	109.42	O=C(OCC)c1c(NC(=O)c2nccnc2)sc2c1cccc2	5	1.62366	4.25	-2.31732
omega_730892	-8.7256	-11.2285	0.588639	4.38707	2.74853	-3.02655	-2.19479	8	CL9263	DC	3	2	J088-0064	5	N-(2-ethylphenyl)-5-{[(4-methylbenzoyl)amino]methyl}-2-furamide	71.34	O=C(Nc1c(CC)cccc1)c1oc(CNC(=O)c2ccc(C)cc2)cc1	223	3.31	4.31	-3.43
omega_952941	-8.72549	-10.7213	0.765252	4.74321	4.96946	-5.18445	-3.29764	4		DC	8	1	Y042-6797	8	6-{3-[(2S)-2-(1H-1,3-benzimidazol-2-yl)tetrahydro-1H-pyrrol-1-yl]-3-oxopropyl}-5H-pyrrolo[3,4-b]pyridine-5,7(6H)-dione	99.26	O=C(CCN1C(=O)c2ncccc2C1=O)N1[C@H](c2[nH]c3c(n2)cccc3)CCC1	30	1.23	1.25	-3.35
omega_1373019	-8.72528	-12.55	0.483945	4.34123	2.95529	-2.68259	-1.27318	5	CL8526	NC	6	1	L228-0817	5	N-(4-chlorophenyl)-5-(2-cyclobutyl-1,3-oxazol-5-yl)thiophene-2-sulfonamide	108.82	Clc1ccc(NO[SH0](=O)c2sc(-c3oc(C4CCC4)nc3)cc2)cc1	163	5.49	4.43	-6.65
omega_62096	-8.7243	-10.9077	0.558395	4.76193	4.75811	-3.94196	-3.95312	7	CL5013	DC	6	2	D205-0354	7	N-(6-benzyl-7-hydroxy-5-methyl[1,2,4]triazolo[1,5-a]pyrimidin-2-yl)-2-(4-chlorophenyl)acetamide	92.41	Clc1ccc(CC(=O)Nc2nn3C(O)=C(Cc4ccccc4)C(C)=Nc3n2)cc1	168	2.27	4.77	-5.44
omega_1500404	-8.72397	-12.2544	0.590511	4.12864	4.95829	-3.65973	-2.48729	7	CM0615	NC	6	3	P574-4701	8	2-[2-amino-4-(methoxymethyl)-6-oxo-1(6H)-pyrimidinyl]-N~1~-(3-fluoro-4-methoxyphenyl)acetamide	106.25	Fc1c(OC)ccc(NC(=O)CN2C(N)=NC(COC)=CC2=O)c1	185	0.312	0.526	-1.73
omega_1255541	-8.72325	-11.9491	0.64382	5.00859	4.61385	-4.68272	-2.35769	4	CL5555	NC	4	1	E714-0030	7	N-(2,3-dimethylcyclohexyl)-2-(4-oxo-7,8,9,10-tetrahydro-4H-azepino[1,2-e]purin-3(6H)-yl)acetamide	79.59	O=C(NC1C(C)C(C)CCC1)CN1C(=O)c2nc3n(c2N=C1)CCCCC3	7	2.48	1.85	-1.7
omega_1291800	-8.72249	-12.9212	0.465419	4.83769	3.44802	-2.41789	-2.13451	3	CL8342	NC	3	2	F731-0244	5	4-bromo-N-(8-methyl-11-oxo-10,11-dihydrodibenzo[b,f][1,4]oxazepin-2-yl)benzamide	67.43	Brc1ccc(C(=O)Nc2cc3C(=O)Nc4c(Oc3cc2)ccc(C)c4)cc1	110	5.15	4.62	-4.08
omega_1475733	-8.72229	-12.5984	0.373936	4.0623	3.92836	-3.57217	-0.916265	4	CM0005	NC	9	0	M876-1309	7	3-(5-{[5-(3,5-difluorophenyl)-1,3,4-oxadiazol-2-yl]methyl}-1,2,4-oxadiazol-3-yl)pyridine	90.73	Fc1cc(F)cc(-c2oc(Cc3onc(-c4cnccc4)n3)nn2)c1	17	0.312	2.146	-1.74
omega_536624	-8.72204	-11.4849	0.302218	4.32592	2.97953	-2.39761	-2.44723	4		DC	5	2	8003-3451	5	2-{2-[(E)-1-(3,4-dichlorophenyl)methylidene]hydrazino}-N-(2-methylphenyl)-2-oxoacetamide	70.56	Clc1c(Cl)ccc(/C=N/NC(=O)C(=O)Nc2c(C)cccc2)c1	15	3.93	3.93	-4.91
omega_1341309	-8.72186	-12.0976	0.885399	6.04568	5.07724	-5.76527	-2.86729	5	CL2482A	NC	6	1	G881-0165	6	N-(4-chlorobenzyl)-2-(7,9-dimethyl-4-oxopyrido[3',2':4,5]thieno[3,2-d]pyrimidin-3(4H)-yl)acetamide	102.9	Clc1ccc(CNC(=O)CN2C(=O)c3sc4nc(C)cc(C)c4c3N=C2)cc1	86	2.24	2.73	-4.89
omega_417727	-8.72183	-14.5451	0.659113	6.83075	2.88058	-1.90018	-2.64698	9		DC	5	2	3253-7512	6	N'-[(1E)-(2-hydroxy-1-naphthyl)methylene]-2-{[1-(4-methylbenzyl)-1H-benzimidazol-2-yl]thio}acetohydrazide	79.51	S(CC(=O)NN=Cc1c(O)ccc2c1cccc2)c1n(Cc2ccc(C)cc2)c2c(n1)cccc2	178	6.07	6.05	-6.09
omega_1280352	-8.72159	-12.2616	0.517833	4.89766	2.69852	-3.13419	-1.43982	5	CL7848	NC	4	1	F434-0820	4	1-(4-bromophenyl)-N-(2-chlorobenzyl)-1H-pyrazole-4-carboxamide	46.92	Brc1ccc(-n2ncc(C(=O)NCc3c(Cl)cccc3)c2)cc1	58	4.54	3.71	-6.54
omega_620554	-8.72062	-11.5156	0.481165	4.17601	2.55663	-2.34321	-2.07558	2		DC	4	0	8019-8802	4	3-{[4-oxo-3(4H)-quinazolinyl]methyl}benzonitrile	56.46	O=C1N(Cc2cc(C#N)ccc2)C=Nc2c1cccc2	38	3.02	3.02	-4.82
omega_49773	-8.72059	-13.1122	0.640841	5.5623	3.53754	-3.83528	-1.51381	2	CL0781	DC	6	0	D064-0337	6	1-{[6-(4-fluorophenyl)[1,2,4]triazolo[3,4-b][1,3,4]thiadiazol-3-yl]methyl}-1H-benzimidazole	89.14	Fc1ccc(C=2Sc3n(c(Cn4c5c(nc4)cccc5)nn3)N=2)cc1	57	3.38	3.69	-4.11
omega_512252	-8.71978	-12.3671	0.577534	5.22929	3.29163	-3.02512	-2.42603	4	CL0355	DC	4	1	6359-0136	4	2-(1,3-benzoxazol-2-ylthio)-1-(2-methyl-1H-indol-3-yl)ethanone	84.19	S(CC(=O)c1c(C)[nH]c2c1cccc2)c1oc2c(n1)cccc2	20	3.13	4.13	-5.56
omega_913107	-8.71974	-11.5156	0.418206	4.90569	4.37294	-3.01832	-3.88261	4		DC	6	2	Y041-9070	6	methyl 2-{[(1-oxo-1,2-dihydro-4-isoquinolinyl)carbonyl]amino}acetate	84.5	O=C(OC)CNC(=O)C=1c2c(C(=O)NC=1)cccc2	30	1.41	1.41	-3.26
omega_90597	-8.7196	-11.6865	0.732348	4.96615	3.57169	-3.76427	-2.53904	3	CL2813A	DC	5	1	D358-0336	5	N-(4-chloro-2-methylphenyl)-2,3-dimethyl-5-oxo-5H-[1,3]thiazolo[3,2-a]pyrimidine-6-carboxamide	87.07	Clc1cc(C)c(NC(=O)C=2C(=O)N3C(C)=C(C)SC3=NC=2)cc1	153	3.21	2.8	-5.03
omega_14940	-8.71906	-14.0981	0.485532	5.54468	4.34096	-2.19195	-2.80021	6	CL3447	DC	8	1	C679-2690	6	2-{[(5-oxo-2-thien-2-yl-5H-[1,3,4]thiadiazolo[3,2-a]pyrimidin-7-yl)methyl]thio}benzoic acid	161.17	S(CC=1N=C2SC(c3sccc3)=NN2C(=O)C=1)c1c(C(=O)O)cccc1	87	-1.65	3.74	-0.39
omega_87084	-8.7186	-11.4021	0.585252	5.28351	4.16868	-4.38505	-2.96891	2	CL7372	DC	4	2	D351-0140	6	5-{[(4-fluorophenyl)amino]methyl}-2-(4-methylphenyl)[1,2,4]triazolo[1,5-a]pyrimidin-7(4H)-one	71.84	Fc1ccc(NCC=2Nc3n(C(=O)C=2)nc(-c2ccc(C)cc2)n3)cc1	119	1.65	3.04	-2.43
omega_1212212	-8.71838	-11.8527	0.545546	4.87765	3.10475	-3.43909	-1.95456	3		NC	5	1	8539-0739	5	(5-chloro-2-hydroxy-4-methylphenyl)[2-(4-methylphenyl)pyrazolo[1,5-a]pyrimidin-6-yl]methanone	67.49	Clc1c(C)cc(O)c(C(=O)C2=Cn3nc(-c4ccc(C)cc4)cc3N=C2)c1	2	4.7	5.21	-4.46
omega_87141	-8.71831	-13.5906	0.415631	5.84803	4.14491	-2.90759	-2.62867	5	CL7372	DC	4	2	D351-0305	6	2-(4-tert-butylphenyl)-5-{[(4-fluorophenyl)amino]methyl}[1,2,4]triazolo[1,5-a]pyrimidin-7(4H)-one	71.84	Fc1ccc(NCC=2Nc3n(C(=O)C=2)nc(-c2ccc(C(C)(C)C)cc2)n3)cc1	203	2.8	3.95	-2.92
omega_113242	-8.71792	-11.8619	0.585948	5.04561	4.58048	-4.12574	-2.94237	5	CL7372	DC	5	2	D489-0111	6	2-(4-fluorophenyl)-5-{[(3-methoxyphenyl)amino]methyl}[1,2,4]triazolo[1,5-a]pyrimidin-7(4H)-one	71.84	Fc1ccc(-c2nn3C(=O)C=C(CNc4c(C)c(C)ccc4)Nc3n2)cc1	164	2.13	2.53	-2.01
omega_187210	-8.71775	-13.2372	0.549104	6.45647	1.59971	-2.41241	-1.6734	2	CL5077	DC	6	1	E973-0460	5	N-[3-(trifluoromethyl)phenyl][1,2,4]triazolo[4,3-c]quinazolin-5-amine	55.11	FC(F)(F)c1cc(NC=2n3c(nnc3)-c3c(N=2)cccc3)ccc1	48	4.06	4.61	-3.96
omega_865666	-8.7173	-12.8295	0.444332	4.79771	5.38099	-4.04866	-2.46222	2	CL2120	DC	6	3	Y020-1120	6	N-[4-amino-6-(1-benzofuran-2-yl)-1,3,5-triazin-2-yl]-N-(3,4-dichlorophenyl)amine	89.86	Clc1c(Cl)ccc(Nc2nc(N)nc(-c3oc4c(c3)cccc4)n2)c1	51	3.8748	5.68	-4.4437
omega_22627	-8.71706	-7.90781	0.607242	2.91572	4.74562	-4.6703	-4.40753	5	CV0299	DC	7	3	C720-0578	7	2-hydroxy-N-(2-hydroxyethyl)-8-methyl-4-oxo-4H-pyrido[1,2-a]pyrimidine-3-carboxamide	102.23	O=C(NCCO)C=1C(=O)N2C(=NC=1O)C=C(C)C=C2	2	-1.34	0.95	2.09
omega_533389	-8.71658	-11.9125	0.331909	4.8013	2.83312	-2.9548	-1.81558	6		DC	4	2	8002-6251	5	N'~1~-[(E)-1-(5-bromo-2-furyl)methylidene]-2-(2-naphthylamino)acetohydrazide	66.63	Brc1oc(C=NNC(=O)CNc2cc3c(cc2)cccc3)cc1	9	4.47	3.5	-4.16
omega_1291819	-8.716	-13.3806	0.473709	5.32036	3.58121	-2.21069	-2.5	3	CL8342	NC	4	2	F731-0301	5	N-(8-chloro-11-oxo-10,11-dihydrodibenzo[b,f][1,4]oxazepin-2-yl)-2-fluorobenzamide	67.43	Clc1cc2NC(=O)c3c(Oc2cc1)ccc(NC(=O)c1c(F)cccc1)c3	70	4.22	4.27	-6.74
omega_1300161	-8.71583	-13.8018	0.379189	5.67193	3.80036	-3.17752	-1.58803	1	CL8429	NC	3	1	F937-1715	4	N-(2,3-dimethylphenyl)-4-methyl-2-phenylpyrimidine-5-carboxamide	54.88	O=C(Nc1c(C)c(C)ccc1)c1c(C)nc(-c2ccccc2)nc1	12	2.59	3.71	-4.73
omega_451837	-8.71577	-8.08461	0.664399	4.49722	5.64186	-7.24208	-4.19255	5		DC	6	2	4076-0155	6	3-(5-chloro-2-thienyl)-N'~5~-[(E)-1-(2-pyridyl)methylidene]-1H-pyrazole-5-carbohydrazide	83.03	Clc1sc(-c2n[nH]c(C(=O)NN=Cc3ncccc3)c2)cc1	18	1.95	3.8	-1.49
omega_445755	-8.7157	-9.64188	0.459888	3.40455	2.3114	-2.92968	-2.31998	6		DC	4	1	3902-0116	5	Phenoxy-acetic acid (1-furan-2-yl-ethylidene)-hydrazide	63.83	O=C(NN=C(C)c1occc1)COc1ccccc1	1	1.51	1.34	-3.02
omega_1353227	-8.71535	-11.7241	0.828584	5.03395	5.93232	-5.31439	-3.4717	6	CL2583	NC	7	3	K221-2654	7	3-[2,4-dioxo-1,4-dihydro-3(2H)-quinazolinyl]-N-[2-(1H-indol-3-yl)ethyl]propanamide	94.3	O=C(NCCc1c2c([nH]c1)cccc2)CCN1C(=O)Nc2c(C1=O)cccc2	1	2.68	2.68	-4.57
omega_12574	-8.71382	-14.1496	0.577447	5.71352	3.14952	-2.94095	-1.06374	5	CL3391	DC	6	0	C656-0173	8	6-[2-(2,3-dihydro-1H-indol-1-yl)-2-oxoethyl]-3-(2-fluorobenzyl)-3,6-dihydro-7H-[1,2,3]triazolo[4,5-d]pyrimidin-7-one	83.69	Fc1c(Cn2nnc3C(=O)N(CC(=O)N4c5c(cccc5)CC4)C=Nc23)cccc1	14	2.22	1.72	-2.67
omega_1289501	-8.71365	-12.0691	0.700107	5.06244	3.01548	-3.18746	-2.2351	3	CL7852	NC	4	1	F692-0058	5	N-(2,5-dimethylphenyl)-4-oxo-4H-[1,3]thiazino[3,2-a]benzimidazole-2-carboxamide	89.29	O=C(Nc1c(C)ccc(C)c1)C=1Sc2n(C(=O)C=1)c1c(n2)cccc1	23	1.66	4.13	-1.93
omega_103327	-8.71296	-13.4094	0.40163	5.35866	4.61173	-3.3613	-2.31429	3	CL8250	DC	4	2	D433-1477	6	6-benzyl-2-{[(4-bromophenyl)amino]methyl}-5-methyl[1,2,4]triazolo[1,5-a]pyrimidin-7(4H)-one	71.84	Brc1ccc(NCc2nn3C(=O)C(Cc4ccccc4)=C(C)Nc3n2)cc1	219	2.4	3.69	-2.66
omega_1500233	-8.71281	-11.3642	0.450341	4.09387	4.17901	-3.63216	-2.43967	4	CM0615	NC	3	3	P574-1816	6	2-(2-amino-4,5-dimethyl-6-oxopyrimidin-1(6H)-yl)-N-(2-methylphenyl)acetamide	87.79	O=C(Nc1c(C)cccc1)CN1C(=O)C(C)=C(C)N=C1N	127	1.669	1.856	0.75
omega_794511	-8.71278	-8.05047	0.811784	5.96482	5.70105	-7.95389	-5.18607	3		DC	6	2	8016-5423	6	3-(4-fluorophenyl)-1H-pyrazole-4-carbaldehyde 4-(4,6-dimethyl-2-pyrimidinyl)hydrazone	78.85	Fc1ccc(-c2c(/C=N\Nc3nc(C)cc(C)n3)c[nH]n2)cc1	31	2.65	2.66	-4.3
[truncated: 28,398 more rows]
