# Supplementary material for: Inhibition of BMPR2 ubiquitination-dependent degradation suppresses bladder cancer cell growth via downregulating Smurf1 expression with 8003-1841
Source: Research Square preprint supplement (doi:10.21203/rs.3.rs-5313133/v1), 2024-10-28
Supplement: Supplementary file 2 [file 9e76b314a2cdc1b5eeea29af.xlsx]

## Sheet: 155
IDNUMBER	Lipinski Score	Drug Score	Name	Smile	Docking Score	logS	logD	2C9 pKi	hERG pIC50	BBB log([brain]:[blood])	P-gp category	2D6 affinity category	PPB90 category	logP	MW
8002-9216	0.9986	0.1864	2-(2 6-dibromo-4-methylanilino)-N'~1~-[(E 2E)-3-phenyl-2-propenylidene]acetohydrazide	Brc1c(NCC(=O)NN=CC=Cc2ccccc2)c(Br)cc(C)c1	-9.275	1.319	2.365	5.4	4.59	-0.1191	no	medium	high	3.798	451.2
M769-1110	1	0.5537	N-{2-[5-(3 5-dimethyl-1H-indol-2-yl)-1 2 4-oxadiazol-3-yl]ethyl}-N-methylacetamide	O=C(N(CCc1nc(-c2c(C)c3c([nH]2)ccc(C)c3)on1)C)C	-9.559	3.005	2.611	5.144	4.772	-1.029	no	medium	high	2.611	312.4
D205-0319	1	0.3774	N-(6-benzyl-7-hydroxy-5-methyl[1 2 4]triazolo[1 5-a]pyrimidin-2-yl)-2-methylpropanamide	O=C(Nc1nn2C(O)=C(Cc3ccccc3)C(C)=Nc2n1)C(C)C	-10.41	2.146	2.54	5.149	4.95	-0.779	no	high	high	2.54	325.4
D205-0317	1	0.5776	N-(6-benzyl-7-hydroxy-5-methyl[1 2 4]triazolo[1 5-a]pyrimidin-2-yl)acetamide	O=C(Nc1nn2C(O)=C(Cc3ccccc3)C(C)=Nc2n1)C	-10.25	2.732	1.792	4.943	4.76	-0.856	no	low	high	1.792	297.3
D205-0343	1	0.2503	N-(6-benzyl-7-hydroxy-5-methyl[1 2 4]triazolo[1 5-a]pyrimidin-2-yl)thiophene-2-carboxamide	O=C(Nc1nn2C(O)=C(Cc3ccccc3)C(C)=Nc2n1)c1sccc1	-10.15	1.487	3.217	5.915	5.271	-1.01	no	medium	high	3.217	365.4
D205-0320	1	0.4218	N-(6-benzyl-7-hydroxy-5-methyl[1 2 4]triazolo[1 5-a]pyrimidin-2-yl)butanamide	O=C(Nc1nn2C(O)=C(Cc3ccccc3)C(C)=Nc2n1)CCC	-10.12	2.212	2.7	5.278	5.059	-0.8394	yes	medium	high	2.7	325.4
D205-0356	1	0.3713	N-(6-benzyl-7-hydroxy-5-methyl[1 2 4]triazolo[1 5-a]pyrimidin-2-yl)cyclopropanecarboxamide	O=C(Nc1nn2C(O)=C(Cc3ccccc3)C(C)=Nc2n1)C1CC1	-10.11	2.245	2.45	5.291	5.049	-0.8724	no	high	high	2.45	323.3
8525-0606	1	0.4746	6-(3-chlorobenzyl)-2-ethyl-5-methyl[1 2 4]triazolo[1 5-a]pyrimidin-7(4H)-one	Clc1cc(CC=2C(=O)n3nc(CC)nc3NC=2C)ccc1	-10.09	1.727	2.841	5.124	4.894	-1.055	no	medium	high	2.841	302.8
D205-0357	0.9977	0.07589	N-(6-benzyl-7-hydroxy-5-methyl[1 2 4]triazolo[1 5-a]pyrimidin-2-yl)cyclohexanecarboxamide	O=C(Nc1nn2C(O)=C(Cc3ccccc3)C(C)=Nc2n1)C1CCCCC1	-9.997	1.445	3.869	5.061	5.429	-0.8486	yes	high	high	3.869	365.4
D205-0361	1	0.3371	N-(6-benzyl-7-hydroxy-5-methyl[1 2 4]triazolo[1 5-a]pyrimidin-2-yl)pentanamide	O=C(Nc1nn2C(O)=C(Cc3ccccc3)C(C)=Nc2n1)CCCC	-9.993	1.974	3.139	5.177	5.213	-0.8299	yes	medium	high	3.139	339.4
8525-0613	1	0.3432	6-(3-chlorobenzyl)-5-methyl-2-propyl[1 2 4]triazolo[1 5-a]pyrimidin-7(4H)-one	Clc1cc(CC=2C(=O)n3nc(CCC)nc3NC=2C)ccc1	-9.881	1.749	3.231	5.339	5.045	-1.056	no	medium	high	3.231	316.8
D205-0344	1	0.3115	N-(6-benzyl-7-hydroxy-5-methyl[1 2 4]triazolo[1 5-a]pyrimidin-2-yl)-3-methylbutanamide	O=C(Nc1nn2C(O)=C(Cc3ccccc3)C(C)=Nc2n1)CC(C)C	-9.876	1.916	2.964	5.255	5.055	-0.7693	yes	high	high	2.964	339.4
8561-08413	1	0.3045	6-(3-chlorobenzyl)-5-methyl-2-(trifluoromethyl)[1 2 4]triazolo[1 5-a]pyrimidin-7(4H)-one	Clc1cc(CC=2C(=O)n3nc(C(F)(F)F)nc3NC=2C)ccc1	-9.741	2.226	3.29	5.424	4.982	-0.6072	no	high	high	3.29	342.7
D205-0362	0.9997	0.2181	N-(6-benzyl-7-hydroxy-5-methyl[1 2 4]triazolo[1 5-a]pyrimidin-2-yl)hexanamide	O=C(Nc1nn2C(O)=C(Cc3ccccc3)C(C)=Nc2n1)CCCCC	-9.718	1.736	3.578	5.108	5.365	-0.8194	yes	medium	high	3.578	353.4
D458-0731	0.9997	0.262	2-(5 7-dimethyl-2-propyl[1 2 4]triazolo[1 5-a]pyrimidin-6-yl)-N-(3-methylphenyl)acetamide	O=C(Nc1cc(C)ccc1)CC1=C(C)n2nc(CCC)nc2N=C1C	-9.317	1.995	3.573	5.341	4.983	-0.2516	no	medium	high	3.573	337.4
8003-1841	1	0.7302	N~1~-(2 5-dimethylphenyl)-2-{2-[(E)-1-(2-hydroxyphenyl)methylidene]hydrazino}-2-oxoacetamide	O=C(NN=Cc1c(O)cccc1)C(=O)Nc1c(C)ccc(C)c1	-10.04	2.937	1.854	4.761	3.409	-0.733	no	low	high	1.854	311.3
8003-0828	1	0.7273	N~1~-(2 6-dimethylphenyl)-2-{2-[(E)-1-(2-hydroxyphenyl)methylidene]hydrazino}-2-oxoacetamide	O=C(NN=Cc1c(O)cccc1)C(=O)Nc1c(C)cccc1C	-9.982	2.937	1.854	4.782	3.344	-0.7229	no	low	high	1.854	311.3
2181-0037	1	0.4863	2-(2-naphthylamino)-N'-[(E)-1-(2-pyridyl)methylidene]acetohydrazide	O=C(NN=Cc1ncccc1)CNc1cc2c(cc1)cccc2	-9.493	1.894	1.562	4.667	4.471	-0.4189	no	low	low	2.155	304.3
8005-6484	1	0.6489	N'~1~-[(E)-1-(2-hydroxy-5-methylphenyl)methylidene]-2-(2-toluidino)acetohydrazide	O=C(NN=Cc1c(O)ccc(C)c1)CNc1c(C)cccc1	-9.246	2.956	0.9696	4.828	4.062	-0.6628	no	low	high	2.351	297.4
D489-0156	1	0.3713	5-{[(4-methylphenyl)amino]methyl}-2-(2-thienyl)[1 2 4]triazolo[1 5-a]pyrimidin-7(4H)-one	O=C1n2nc(-c3sccc3)nc2NC(CNc2ccc(C)cc2)=C1	-9.943	1.586	2.057	5.657	5.229	-1.238	no	medium	low	2.346	337.4
D351-0053	1	0.2522	5-{[(2-ethoxyphenyl)amino]methyl}-2-phenyl[1 2 4]triazolo[1 5-a]pyrimidin-7(4H)-one	O(CC)c1c(NCC=2Nc3n(C(=O)C=2)nc(-c2ccccc2)n3)cccc1	-9.705	1.15	2.59	5.752	5.246	-1.034	yes	medium	high	2.609	361.4
C190-0060	1	0.4793	N-[2-(acetylamino)ethyl]-2 4-dioxo-3-pentyl-1 2 3 4-tetrahydroquinazoline-7-carboxamide	O=C(NCCNC(=O)c1cc2NC(=O)N(CCCCC)C(=O)c2cc1)C	-10.54	2.957	1.052	4.25	3.718	-1.037	yes	low	low	1.052	360.4
Y042-3520	1	0.2911	2-allyl-N-[2-(1H-indol-3-yl)ethyl]-1 3-dioxo-5-isoindolinecarboxamide	O=C(NCCc1c2c([nH]c1)cccc2)c1cc2C(=O)N(CC=C)C(=O)c2cc1	-10.32	1.118	2.712	5.641	4.613	-0.2949	yes	medium	high	2.712	373.4
Y042-3616	1	0.3474	N-[2-(1H-indol-3-yl)ethyl]-2-(3-methoxypropyl)-1 3-dioxo-5-isoindolinecarboxamide	O=C(NCCc1c2c([nH]c1)cccc2)c1cc2C(=O)N(CCCOC)C(=O)c2cc1	-10.14	1.449	2.575	5.5	4.572	-0.3972	yes	medium	high	2.575	405.4
2397-0173	1	0.6882	2-bromo-N~1~-(3-{2-[(E)-1-(2-furyl)methylidene]hydrazino}-3-oxopropyl)benzamide	Brc1c(C(=O)NCCC(=O)NN=Cc2occc2)cccc1	-10.07	2.409	2.178	4.445	3.505	-0.3684	no	medium	low	2.178	364.2
Y041-8967	1	0.4289	N-(1H-indol-6-yl)-2-(3-oxo-2 3-dihydro-1H-isoindol-1-yl)acetamide	O=C(Nc1cc2[nH]ccc2cc1)CC1NC(=O)c2c1cccc2	-10.05	1.993	2.288	4.988	4.022	-0.1722	no	high	high	2.288	305.3
P932-0104F	1	0.5889	[3-(hydroxymethyl)-1-methyl-1 4 6 7-tetrahydro-5H-pyrazolo[4 3-c]pyridin-5-yl](1H-indol-5-yl)methanone	O=C(N1Cc2c(CO)nn(C)c2CC1)c1cc2c([nH]cc2)cc1	-9.859	3.1	1.211	5.269	4.919	-0.9905	no	low	low	1.211	310.4
2235-0048	1	0.7476	2-hydroxy-N-(2-oxo-2-{2-[(E)-1-(2-pyridyl)methylidene]hydrazino}ethyl)benzamide	O=C(NN=Cc1ncccc1)CNC(=O)c1c(O)cccc1	-9.59	2.617	0.8417	4.448	2.953	-0.6157	no	low	low	0.8417	298.3
1359-0038	1	0.7322	2-bromo-N-(2-{2-[(E)-1-(2-furyl)methylidene]hydrazino}-2-oxoethyl)benzamide	Brc1c(C(=O)NCC(=O)NN=Cc2occc2)cccc1	-9.586	2.658	1.697	4.388	3.411	-0.3703	no	low	low	1.697	350.2
C720-0595	1	0.3615	N-(4-fluorobenzyl)-2-hydroxy-8-methyl-4-oxo-4H-pyrido[1 2-a]pyrimidine-3-carboxamide	Fc1ccc(CNC(=O)C=2C(=O)N3C(=NC=2O)C=C(C)C=C3)cc1	-11.63	0.9917	1.368	5.355	4.453	-0.8176	no	medium	high	2.285	327.3
C720-0661	1	0.4148	2-hydroxy-4-oxo-N-(1-phenylethyl)-4H-pyrido[1 2-a]pyrimidine-3-carboxamide	O=C(NC(C)c1ccccc1)C=1C(=O)N2C(=NC=1O)C=CC=C2	-11.43	1.385	1.449	5.04	4.164	-0.7013	no	high	high	2.115	309.3
C720-0600	1	0.2767	N-(4-chlorobenzyl)-2-hydroxy-8-methyl-4-oxo-4H-pyrido[1 2-a]pyrimidine-3-carboxamide	Clc1ccc(CNC(=O)C=2C(=O)N3C(=NC=2O)C=C(C)C=C3)cc1	-11.37	0.7835	1.913	5.548	4.239	-0.8219	no	medium	high	2.784	343.8
C720-0593	1	0.5322	N-benzyl-2-hydroxy-8-methyl-4-oxo-4H-pyrido[1 2-a]pyrimidine-3-carboxamide	O=C(NCc1ccccc1)C=1C(=O)N2C(=NC=1O)C=C(C)C=C2	-11.34	1.421	1.312	5.167	4.056	-0.7646	no	medium	high	2.114	309.3
C720-0657	1	0.4217	N-(4-fluorobenzyl)-2-hydroxy-4-oxo-4H-pyrido[1 2-a]pyrimidine-3-carboxamide	Fc1ccc(CNC(=O)C=2C(=O)N3C(=NC=2O)C=CC=C3)cc1	-11.23	1.206	1.14	5.104	4.444	-0.7888	no	medium	high	1.903	313.3
C720-0662	1	0.3748	N-(4-chlorobenzyl)-2-hydroxy-4-oxo-4H-pyrido[1 2-a]pyrimidine-3-carboxamide	Clc1ccc(CNC(=O)C=2C(=O)N3C(=NC=2O)C=CC=C3)cc1	-10.95	1.001	1.67	5.263	4.231	-0.7943	no	medium	high	2.405	329.7
C720-0599	1	0.3498	2-hydroxy-8-methyl-4-oxo-N-(1-phenylethyl)-4H-pyrido[1 2-a]pyrimidine-3-carboxamide	O=C(NC(C)c1ccccc1)C=1C(=O)N2C(=NC=1O)C=C(C)C=C2	-10.6	1.159	1.697	5.217	4.173	-0.7308	no	high	high	2.492	323.3
G205-0890	1	0.3415	N-(4-fluorobenzyl)-5-oxo-2-pyrrolidin-1-yl-5H-[1 3 4]thiadiazolo[3 2-a]pyrimidine-6-carboxamide	Fc1ccc(CNC(=O)C=2C(=O)N3N=C(N4CCCC4)SC3=NC=2)cc1	-10.45	1.596	1.764	5.296	5.346	-0.9527	yes	low	low	1.46	373.4
C720-0609	1	0.3978	2-hydroxy-8-methyl-4-oxo-N-(3-phenylpropyl)-4H-pyrido[1 2-a]pyrimidine-3-carboxamide	O=C(NCCCc1ccccc1)C=1C(=O)N2C(=NC=1O)C=C(C)C=C2	-10.39	1.289	1.645	5.264	4.378	-0.7845	no	medium	high	2.733	337.4
C720-0610	1	0.2457	2-hydroxy-8-methyl-N-(1-methyl-3-phenylpropyl)-4-oxo-4H-pyrido[1 2-a]pyrimidine-3-carboxamide	O=C(NC(CCc1ccccc1)C)C=1C(=O)N2C(=NC=1O)C=C(C)C=C2	-10.39	1.089	1.829	5.249	4.45	-0.7306	no	high	high	3.141	351.4
C720-0532	1	0.535	N-benzyl-2-hydroxy-9-methyl-4-oxo-4H-pyrido[1 2-a]pyrimidine-3-carboxamide	O=C(NCc1ccccc1)C=1C(=O)N2C(C(C)=CC=C2)=NC=1O	-10.38	1.421	1.41	5.171	4.1	-0.7544	no	medium	high	2.114	309.3
G205-1978	1	0.3329	N-cycloheptyl-2-(diethylamino)-5-oxo-5H-[1 3 4]thiadiazolo[3 2-a]pyrimidine-6-carboxamide	O=C(NC1CCCCCC1)C=1C(=O)N2N=C(N(CC)CC)SC2=NC=1	-10.27	1.724	1.761	4.656	5.156	-0.8412	yes	high	low	2.855	363.5
D358-0025	1	0.6343	5-oxo-N-(1-phenylethyl)-5H-[1 3]thiazolo[3 2-a]pyrimidine-6-carboxamide	O=C(NC(C)c1ccccc1)C=1C(=O)N2C(SC=C2)=NC=1	-10.26	2.244	1.624	4.739	4.368	-0.6504	no	medium	high	1.624	299.3
C720-0656	1	0.3829	N-(2-chlorobenzyl)-2-hydroxy-4-oxo-4H-pyrido[1 2-a]pyrimidine-3-carboxamide	Clc1c(CNC(=O)C=2C(=O)N3C(=NC=2O)C=CC=C3)cccc1	-10.24	1.001	1.681	5.272	4.083	-0.7843	no	medium	high	2.405	329.7
G205-0831	1	0.3756	N-(4-chlorobenzyl)-5-oxo-2-(1-pyrrolidinyl)-5H-[1 3 4]thiadiazolo[3 2-a]pyrimidine-6-carboxamide	Clc1ccc(CNC(=O)C=2C(=O)N3N=C(N4CCCC4)SC3=NC=2)cc1	-10.19	1.526	2.312	5.314	5.122	-0.9522	yes	low	high	1.784	389.9
C720-0538	1	0.3477	2-hydroxy-9-methyl-4-oxo-N-(1-phenylethyl)-4H-pyrido[1 2-a]pyrimidine-3-carboxamide	O=C(NC(C)c1ccccc1)C=1C(=O)N2C(C(C)=CC=C2)=NC=1O	-10.15	1.159	1.795	5.229	4.216	-0.72	no	high	high	2.492	323.3
C720-0579	1	0.6926	2-hydroxy-N-(3-hydroxypropyl)-8-methyl-4-oxo-4H-pyrido[1 2-a]pyrimidine-3-carboxamide	O=C(NCCCO)C=1C(=O)N2C(=NC=1O)C=C(C)C=C2	-10.09	2.869	-0.3002	4.273	3.76	-0.8667	no	low	low	0.3133	277.3
C720-0659	1	0.5233	2-hydroxy-N-(4-methylbenzyl)-4-oxo-4H-pyrido[1 2-a]pyrimidine-3-carboxamide	O=C(NCc1ccc(C)cc1)C=1C(=O)N2C(=NC=1O)C=CC=C2	-10.04	1.421	1.297	5.162	4.203	-0.7646	no	medium	high	2.114	309.3
G205-2408	1	0.173	N-cyclohexyl-2-(3-methylpiperidin-1-yl)-5-oxo-5H-[1 3 4]thiadiazolo[3 2-a]pyrimidine-6-carboxamide	O=C(NC1CCCCC1)C=1C(=O)N2N=C(N3CC(C)CCC3)SC2=NC=1	-9.958	1.615	1.991	4.714	5.239	-0.9566	yes	high	low	2.695	375.5
C720-0660	1	0.3628	N-(1 3-benzodioxol-5-ylmethyl)-2-hydroxy-4-oxo-4H-pyrido[1 2-a]pyrimidine-3-carboxamide	O=C(NCc1cc2OCOc2cc1)C=1C(=O)N2C(=NC=1O)C=CC=C2	-9.949	1.1	1.189	5.339	4.019	-1.105	no	low	low	1.203	339.3
D358-0165	1	0.5088	3-methyl-5-oxo-N-(1-phenylethyl)-5H-[1 3]thiazolo[3 2-a]pyrimidine-6-carboxamide	O=C(NC(C)c1ccccc1)C=1C(=O)N2C(C)=CSC2=NC=1	-9.948	1.971	2.032	4.998	4.415	-0.6594	no	high	high	2.032	313.4
C720-0603	1	0.6175	N-(2-furylmethyl)-2-hydroxy-8-methyl-4-oxo-4H-pyrido[1 2-a]pyrimidine-3-carboxamide	O=C(NCc1occc1)C=1C(=O)N2C(=NC=1O)C=C(C)C=C2	-9.936	1.824	0.7591	4.933	3.86	-0.8107	no	low	low	1.761	299.3
C720-0008	1	0.5615	4-oxo-N-(1-phenylethyl)-4H-pyrido[1 2-a]pyrimidine-3-carboxamide	O=C(NC(C)c1ccccc1)C=1C(=O)N2C(=NC=1)C=CC=C2	-9.932	1.896	1.895	4.866	4.416	-0.2386	no	medium	high	1.895	293.3
G205-0853	1	0.438	N-(4-methylbenzyl)-5-oxo-2-pyrrolidin-1-yl-5H-[1 3 4]thiadiazolo[3 2-a]pyrimidine-6-carboxamide	O=C(NCc1ccc(C)cc1)C=1C(=O)N2N=C(N3CCCC3)SC2=NC=1	-9.922	1.918	1.912	5.31	5.107	-0.9561	yes	low	high	1.645	369.4
Y042-6552	1	0.4163	N~6~-[(1S)-1-(1H-1 3-benzimidazol-2-yl)ethyl]-5-oxo-5H-[1 3]thiazolo[3 2-a]pyrimidine-6-carboxamide	O=C(NC(C)c1[nH]c2c(n1)cccc2)C=1C(=O)N2C(SC=C2)=NC=1	-9.913	1.372	1.804	5.401	4.413	-1.075	yes	low	high	1.804	339.4
C720-0670	1	0.4646	2-hydroxy-4-oxo-N-(3-phenylpropyl)-4H-pyrido[1 2-a]pyrimidine-3-carboxamide	O=C(NCCCc1ccccc1)C=1C(=O)N2C(=NC=1O)C=CC=C2	-9.912	1.477	1.423	5.03	4.368	-0.755	no	medium	high	2.341	323.3
D358-0023	1	0.5899	N-(4-chlorobenzyl)-5-oxo-5H-[1 3]thiazolo[3 2-a]pyrimidine-6-carboxamide	Clc1ccc(CNC(=O)C=2C(=O)N3C(SC=C3)=NC=2)cc1	-9.868	1.748	1.819	4.986	4.431	-0.7155	no	low	high	1.819	319.8
C720-0655	1	0.6198	N-benzyl-2-hydroxy-4-oxo-4H-pyrido[1 2-a]pyrimidine-3-carboxamide	O=C(NCc1ccccc1)C=1C(=O)N2C(=NC=1O)C=CC=C2	-9.868	1.622	1.058	4.767	4.046	-0.7336	no	low	high	1.733	295.3
C720-0665	1	0.6665	N-(2-furylmethyl)-2-hydroxy-4-oxo-4H-pyrido[1 2-a]pyrimidine-3-carboxamide	O=C(NCc1occc1)C=1C(=O)N2C(=NC=1O)C=CC=C2	-9.847	1.983	0.4877	4.807	3.851	-0.7779	no	low	low	1.389	285.3
C720-0663	1	0.5806	2-hydroxy-4-oxo-N-(pyridin-3-ylmethyl)-4H-pyrido[1 2-a]pyrimidine-3-carboxamide	O=C(NCc1cnccc1)C=1C(=O)N2C(=NC=1O)C=CC=C2	-9.785	1.426	0.4395	4.788	3.779	-0.8024	no	low	low	0.8499	296.3
C720-0617	1	0.6973	N-[2-(diethylamino)ethyl]-2-hydroxy-8-methyl-4-oxo-4H-pyrido[1 2-a]pyrimidine-3-carboxamide	O=C(NCCN(CC)CC)C=1C(=O)N2C(=NC=1O)C=C(C)C=C2	-9.783	3.043	0.5632	4.313	4.336	-0.8335	yes	low	low	1.665	318.4
C720-0601	1	0.5101	2-hydroxy-8-methyl-4-oxo-N-(pyridin-3-ylmethyl)-4H-pyrido[1 2-a]pyrimidine-3-carboxamide	O=C(NCc1cnccc1)C=1C(=O)N2C(=NC=1O)C=C(C)C=C2	-9.754	1.245	0.6508	5.07	3.79	-0.8354	no	low	low	1.218	310.3
C720-0536	1	0.4378	2-hydroxy-9-methyl-N-(4-methylbenzyl)-4-oxo-4H-pyrido[1 2-a]pyrimidine-3-carboxamide	O=C(NCc1ccc(C)cc1)C=1C(=O)N2C(C(C)=CC=C2)=NC=1O	-9.722	1.207	1.596	5.322	4.247	-0.784	no	medium	high	2.489	323.3
G205-1356	1	0.3268	N-cyclopentyl-2-(dipropylamino)-5-oxo-5H-[1 3 4]thiadiazolo[3 2-a]pyrimidine-6-carboxamide	O=C(NC1CCCC1)C=1C(=O)N2N=C(N(CCC)CCC)SC2=NC=1	-9.715	1.944	1.924	4.688	5.227	-0.839	yes	high	low	2.515	363.5
C720-0678	1	0.7274	N-[2-(diethylamino)ethyl]-2-hydroxy-4-oxo-4H-pyrido[1 2-a]pyrimidine-3-carboxamide	O=C(NCCN(CC)CC)C=1C(=O)N2C(=NC=1O)C=CC=C2	-9.691	3.182	0.3278	4.215	4.329	-0.805	no	low	low	1.277	304.3
C720-0571	1	0.7607	2-hydroxy-N-isobutyl-8-methyl-4-oxo-4H-pyrido[1 2-a]pyrimidine-3-carboxamide	O=C(NCC(C)C)C=1C(=O)N2C(=NC=1O)C=C(C)C=C2	-9.688	2.178	1.192	4.376	3.86	-0.6252	no	low	low	1.597	275.3
G205-0980	1	0.3995	5-oxo-2-pyrrolidin-1-yl-N-(2-thien-2-ylethyl)-5H-[1 3 4]thiadiazolo[3 2-a]pyrimidine-6-carboxamide	O=C(NCCc1sccc1)C=1C(=O)N2N=C(N3CCCC3)SC2=NC=1	-9.563	1.915	1.738	5.175	5.094	-1.034	yes	low	low	1.89	375.5
G205-0587	1	0.3925	N-(2 6-dimethylphenyl)-2-morpholin-4-yl-5-oxo-5H-[1 3 4]thiadiazolo[3 2-a]pyrimidine-6-carboxamide	O=C(Nc1c(C)cccc1C)C=1C(=O)N2N=C(N3CCOCC3)SC2=NC=1	-9.302	2.226	2.142	5.456	4.92	-0.9857	yes	low	high	1.825	385.4
D668-0053	1	0.6346	N-(2-chlorophenyl)-2-hydroxy-6-oxo-1 6-dihydropyrimidine-5-sulfonamide	Clc1c(NS(=O)(=O)C=2C(=O)NC(O)=NC=2)cccc1	-9.859	2.13	1.508	4.553	4.247	-1.372	no	low	high	1.508	301.7
E138-2037	1	0.538	2-amino-5-bromo-N-(2 3-dimethylphenyl)pyridine-3-sulfonamide	Brc1cc(S(=O)(=O)Nc2c(C)c(C)ccc2)c(N)nc1	-9.292	2.036	1.389	5.06	4.837	-0.6253	no	medium	high	2.199	356.2
Y041-7672	1	0.6627	N-[2-(1H-1 3-benzimidazol-2-yl)ethyl]-3-(3 5-dimethyl-1H-pyrazol-4-yl)propanamide	O=C(NCCc1[nH]c2c(n1)cccc2)CCc1c(C)[nH]nc1C	-10.23	2.803	2.378	4.858	3.982	-0.79	no	medium	low	2.378	311.4
Y042-6969	1	0.5277	N~5~-[2-(1H-1 3-benzimidazol-2-yl)ethyl]-3-(2-furyl)-1H-pyrazole-5-carboxamide	O=C(NCCc1[nH]c2c(n1)cccc2)c1[nH]nc(-c2occc2)c1	-10.04	2.312	2.004	5.318	4.056	-0.6052	yes	low	low	2.004	321.3
F259-0417	1	0.3878	N~1~-[2-(acetylamino)-1 3-benzothiazol-6-yl]-3-(1H-1 3-benzimidazol-2-yl)propanamide	O=C(Nc1cc2sc(NC(=O)C)nc2cc1)CCc1[nH]c2c(n1)cccc2	-9.818	2.201	2.71	5.659	4.695	-1.26	yes	medium	high	2.71	379.4
2423-4084	1	0.5084	4-methyl-3-phenyl-N'~5~-[(E)-1-(2-pyridyl)methylidene]-1H-pyrazole-5-carbohydrazide	O=C(NN=Cc1ncccc1)c1c(C)c(-c2ccccc2)n[nH]1	-9.399	1.968	1.979	5.131	3.673	-0.271	no	low	high	1.979	305.3
P574-4668	1	0.7416	2-[2-amino-4-(methoxymethyl)-6-oxo-1(6H)-pyrimidinyl]-N~1~-(2 3-dimethylphenyl)acetamide	O=C(Nc1c(C)c(C)ccc1)CN1C(N)=NC(COC)=CC1=O	-10.66	2.896	0.8825	4.747	3.943	-0.7955	no	low	low	0.8699	316.4
P574-0994	1	0.657	2-amino-3-[2-(2 3-dihydro-1H-indol-1-yl)-2-oxoethyl]-6-methyl-4(3H)-pyrimidinone	O=C(CN1C(N)=NC(C)=CC1=O)N1c2c(cccc2)CC1	-10.6	2.646	0.3946	4.673	4.45	-0.7305	no	low	low	0.4445	284.3
4112-1225	1	0.6453	4-(dimethylamino)benzaldehyde (5-chloro-6-oxo-1 6-dihydropyridazin-4-yl)hydrazone	ClC=1C(=O)NN=CC=1NN=Cc1ccc(N(C)C)cc1	-10.59	2.734	1.727	4.689	4.634	-1.028	no	medium	low	2.165	291.7
8018-5171	1	0.5424	N-(4-chlorobenzyl)-N-[2-(1H-1 2 3 4-tetraazol-5-yl)phenyl]amine	Clc1ccc(CNc2c(-c3[nH]nnn3)cccc2)cc1	-10.52	2.717	0.02269	5.132	4.792	-0.9128	no	medium	high	2.606	285.7
C612-0840	1	0.6476	3-{[(2-chloro-4-methylphenyl)amino]carbonyl}pyrazine-2-carboxylic acid	Clc1c(NC(=O)c2c(C(=O)O)nccn2)ccc(C)c1	-10.46	2.445	-0.658	5.044	3.624	-0.4302	no	medium	high	2.526	291.7
P574-4660	1	0.6915	2-[2-amino-4-(methoxymethyl)-6-oxo-1(6H)-pyrimidinyl]-N~1~-(2-methylphenyl)acetamide	O=C(Nc1c(C)cccc1)CN1C(N)=NC(COC)=CC1=O	-10.44	2.687	0.8036	4.496	3.95	-0.7591	no	low	low	0.5576	302.3
8018-5172	1	0.6695	N-(4-pyridylmethyl)-N-[2-(1H-1 2 3 4-tetraazol-5-yl)phenyl]amine	N(Cc1ccncc1)c1c(-c2[nH]nnn2)cccc1	-10.27	3.369	-0.9803	4.655	4.334	-1.117	yes	low	low	1.134	252.3
P574-1476	1	0.6435	2-amino-3-[2-(2 3-dihydro-1H-indol-1-yl)-2-oxoethyl]-6-ethyl-4(3H)-pyrimidinone	O=C(CN1C(N)=NC(CC)=CC1=O)N1c2c(cccc2)CC1	-10.22	2.435	0.6005	4.734	4.636	-0.7223	no	low	low	0.839	298.3
P574-0930	1	0.6672	2-[2-amino-4-methyl-6-oxo-1(6H)-pyrimidinyl]-N~1~-(2-fluorophenyl)acetamide	Fc1c(NC(=O)CN2C(N)=NC(C)=CC2=O)cccc1	-10.22	2.424	0.7656	4.754	4.144	-0.6548	no	low	low	0.5758	276.3
P574-0931	1	0.6746	2-[2-amino-4-methyl-6-oxo-1(6H)-pyrimidinyl]-N~1~-(3-fluorophenyl)acetamide	Fc1cc(NC(=O)CN2C(N)=NC(C)=CC2=O)ccc1	-10.17	2.838	0.6038	4.754	4.156	-0.6828	no	low	low	0.5172	276.3
C612-1045	1	0.6808	3-({[3-(methylthio)phenyl]amino}carbonyl)pyrazine-2-carboxylic acid	S(C)c1cc(NC(=O)c2c(C(=O)O)nccn2)ccc1	-10.14	3.025	-1.164	4.557	3.585	-0.422	no	medium	high	1.951	289.3
P574-4681	1	0.6043	2-[2-amino-4-(methoxymethyl)-6-oxo-1(6H)-pyrimidinyl]-N~1~-(3-fluorophenyl)acetamide	Fc1cc(NC(=O)CN2C(N)=NC(COC)=CC2=O)ccc1	-10.13	2.917	0.5317	4.726	4.206	-0.766	no	low	low	0.2852	306.3
P574-0879	1	0.6677	2-[2-amino-4-methyl-6-oxo-1(6H)-pyrimidinyl]-N~1~-phenylacetamide	O=C(Nc1ccccc1)CN1C(N)=NC(C)=CC1=O	-10.13	2.773	0.5763	4.203	3.899	-0.6741	no	low	low	0.4435	258.3
P574-4690	1	0.643	2-[2-amino-4-(methoxymethyl)-6-oxo-1(6H)-pyrimidinyl]-N~1~-(2-chloro-4-fluorophenyl)acetamide	Clc1c(NC(=O)CN2C(N)=NC(COC)=CC2=O)ccc(F)c1	-10.11	2.186	1.223	4.835	4.362	-0.7358	no	low	high	1.034	340.7
8016-7731	1	0.6892	3-(4-toluidinocarbonyl)-2-pyrazinecarboxylic acid	O=C(O)c1c(C(=O)Nc2ccc(C)cc2)nccn1	-10.1	3.247	-1.406	4.588	3.704	-0.4079	no	low	high	1.866	257.2
P574-4665	1	0.6807	2-[2-amino-4-(methoxymethyl)-6-oxo-1(6H)-pyrimidinyl]-N~1~-(2-ethylphenyl)acetamide	O=C(Nc1c(CC)cccc1)CN1C(N)=NC(COC)=CC1=O	-10.08	2.499	1.013	4.633	4.137	-0.761	no	low	low	0.9397	316.4
P574-1930	1	0.6748	2-amino-3-[2-(2 3-dihydro-1H-indol-1-yl)-2-oxoethyl]-5 6-dimethyl-4(3H)-pyrimidinone	O=C(CN1C(=O)C(C)=C(C)N=C1N)N1c2c(cccc2)CC1	-10.07	2.398	0.7275	4.846	4.464	-0.7197	no	low	low	0.8508	298.3
P574-1426	1	0.5699	2-[2-amino-4-ethyl-6-oxo-1(6H)-pyrimidinyl]-N-(2-chloro-4-fluorophenyl)acetamide	Clc1c(NC(=O)CN2C(N)=NC(CC)=CC2=O)ccc(F)c1	-10.06	1.851	1.536	4.941	4.504	-0.6522	no	low	high	1.69	324.7
P574-4666	1	0.7016	2-[2-amino-4-(methoxymethyl)-6-oxo-1(6H)-pyrimidinyl]-N~1~-(3-ethylphenyl)acetamide	O=C(Nc1cc(CC)ccc1)CN1C(N)=NC(COC)=CC1=O	-10	2.907	0.8366	4.623	4.149	-0.7994	no	low	low	0.8981	316.4
P574-4670	1	0.7426	2-[2-amino-4-(methoxymethyl)-6-oxo-1(6H)-pyrimidinyl]-N~1~-(2 5-dimethylphenyl)acetamide	O=C(Nc1c(C)ccc(C)c1)CN1C(N)=NC(COC)=CC1=O	-9.981	2.896	0.9134	4.736	4.01	-0.8068	no	low	low	0.8699	316.4
P574-1414	1	0.6729	2-(2-amino-4-ethyl-6-oxopyrimidin-1(6H)-yl)-N-(3-fluorophenyl)acetamide	Fc1cc(NC(=O)CN2C(N)=NC(CC)=CC2=O)ccc1	-9.978	2.61	0.8342	4.818	4.346	-0.6889	no	low	low	0.9011	290.3
8018-6163	1	0.5695	N-(1 3-benzodioxol-5-ylmethyl)-N-[2-(1H-1 2 3 4-tetraazol-5-yl)phenyl]amine	N(Cc1cc2OCOc2cc1)c1c(-c2[nH]nnn2)cccc1	-9.966	2.887	-0.4688	4.975	4.597	-0.7745	yes	low	low	1.567	295.3
P574-0936	1	0.5498	2-[2-amino-4-methyl-6-oxo-1(6H)-pyrimidinyl]-N~1~-(3 5-difluorophenyl)acetamide	Fc1cc(F)cc(NC(=O)CN2C(N)=NC(C)=CC2=O)c1	-9.893	1.88	0.715	4.881	4.349	-0.6685	no	low	low	0.7226	294.3
P574-4682	1	0.5987	2-[2-amino-4-(methoxymethyl)-6-oxo-1(6H)-pyrimidinyl]-N~1~-(4-fluorophenyl)acetamide	Fc1ccc(NC(=O)CN2C(N)=NC(COC)=CC2=O)cc1	-9.869	2.808	0.5063	4.761	4.441	-0.765	no	low	low	0.3205	306.3
P574-1372	1	0.6271	2-(2-amino-4-ethyl-6-oxopyrimidin-1(6H)-yl)-N-(2-ethylphenyl)acetamide	O=C(Nc1c(CC)cccc1)CN1C(N)=NC(CC)=CC1=O	-9.847	2.126	1.319	4.78	4.279	-0.68	no	low	high	1.61	300.4
C612-1331	1	0.6855	3-{[(3-methylphenyl)amino]carbonyl}pyrazine-2-carboxylic acid	O=C(O)c1c(C(=O)Nc2cc(C)ccc2)nccn1	-9.839	3.247	-1.362	4.661	3.542	-0.4079	no	low	high	1.866	257.2
C612-1082	1	0.6415	N-(3-fluoro-4-methylphenyl)-3-(hydroxymethyl)pyrazine-2-carboxamide	Fc1c(C)ccc(NC(=O)c2c(CO)nccn2)c1	-9.833	2.961	1.471	5.046	4.571	0.03313	no	low	low	1.471	261.3
P574-1421	1	0.6664	2-(2-amino-4-ethyl-6-oxopyrimidin-1(6H)-yl)-N-(3-chlorophenyl)acetamide	Clc1cc(NC(=O)CN2C(N)=NC(CC)=CC2=O)ccc1	-9.813	2.261	1.416	4.697	4.149	-0.675	no	low	low	1.59	306.7
P574-0895	1	0.6821	2-(2-amino-4-methyl-6-oxopyrimidin-1(6H)-yl)-N-(3-methoxyphenyl)acetamide	O=C(Nc1cc(OC)ccc1)CN1C(N)=NC(C)=CC1=O	-9.812	3.144	0.469	4.422	3.902	-0.8238	no	low	low	0.4501	288.3
P574-4695	1	0.6951	2-[2-amino-4-(methoxymethyl)-6-oxo-1(6H)-pyrimidinyl]-N~1~-(5-fluoro-2-methylphenyl)acetamide	Fc1cc(NC(=O)CN2C(N)=NC(COC)=CC2=O)c(C)cc1	-9.802	2.687	0.8057	4.719	4.256	-0.7809	no	low	low	0.6436	320.3
C612-0728	1	0.6452	3-{[(4-bromo-3-methylphenyl)amino]carbonyl}pyrazine-2-carboxylic acid	Brc1c(C)cc(NC(=O)c2c(C(=O)O)nccn2)cc1	-9.786	2.515	-0.9309	5.102	3.786	-0.4334	no	medium	high	2.557	336.1
M710-0051	0.9985	0.181	N-(2 5-dimethylphenyl)-6-(3-thienyl)nicotinamide	O=C(Nc1c(C)ccc(C)c1)c1cnc(-c2cscc2)cc1	-9.784	1.205	3.809	5.783	4.654	-0.3531	no	medium	high	3.809	308.4
P574-4694	1	0.6849	2-[2-amino-4-(methoxymethyl)-6-oxo-1(6H)-pyrimidinyl]-N~1~-(4-fluoro-2-methylphenyl)acetamide	Fc1cc(C)c(NC(=O)CN2C(N)=NC(COC)=CC2=O)cc1	-9.784	2.585	0.8018	4.797	4.327	-0.7801	no	low	low	0.6722	320.3
8020-2482	1	0.7036	5-[(3-fluoroanilino)methyl]-1 2-dihydro-3H-1 2 4-triazol-3-one	Fc1cc(NCC2=NC(=O)NN2)ccc1	-9.776	3.051	0.04853	4.014	3.745	-1.184	no	low	low	0.3396	208.2
P574-0932	1	0.667	2-[2-amino-4-methyl-6-oxo-1(6H)-pyrimidinyl]-N~1~-(4-fluorophenyl)acetamide	Fc1ccc(NC(=O)CN2C(N)=NC(C)=CC2=O)cc1	-9.683	2.738	0.5396	4.771	4.391	-0.6813	no	low	low	0.5633	276.3
Y042-7090	1	0.5268	3-(4-methoxyphenyl)-N-(3-methyl-4-oxo-3 4-dihydro-1 2 3-benzotriazin-6-yl)propanamide	O=C(Nc1cc2C(=O)N(C)N=Nc2cc1)CCc1ccc(OC)cc1	-9.531	2.204	1.852	4.799	5.047	-0.905	no	low	high	1.852	338.4
C803-0070	1	0.3128	3-(4-methoxyphenyl)-N-(11-oxo-6 8 9 11-tetrahydro-7H-pyrido[2 1-b]quinazolin-2-yl)propanamide	O=C(Nc1cc2C(=O)N3C(=Nc2cc1)CCCC3)CCc1ccc(OC)cc1	-9.512	1.679	2.9	5.156	5.54	-0.9235	yes	medium	high	2.9	377.4
5830-0597	1	0.706	5-(4-methoxyanilino)-6-methyl-1 2 4-triazin-3(2H)-one	O(C)c1ccc(NC=2C(C)=NNC(=O)N=2)cc1	-9.426	2.893	1.594	4.004	4.601	-1.06	no	low	low	1.594	232.2
2729-0378	1	0.3891	3-hydroxy-N'-[(1E)-(2-hydroxy-5-methoxyphenyl)methylene]-1-benzothiophene-2-carbohydrazide	O=C(NN=Cc1c(O)ccc(OC)c1)c1c(O)c2c(s1)cccc2	-10.04	1.261	2.867	5.43	4.442	-1.194	no	medium	high	2.867	342.4
0784-0388	1	0.1447	3-hydroxy-N'-[(E)-1-(2-hydroxy-5-nitrophenyl)methylidene]-2-naphthohydrazide	O=[N+]([O-])c1cc(C=NNC(=O)c2c(O)cc3c(c2)cccc3)c(O)cc1	-9.784	1.201	3.193	5.476	4.484	-0.7943	no	high	high	3.193	351.3
8016-0392	1	0.3411	3-(1-naphthylmethyl)-3 6-dihydro-7H-[1 2 3]triazolo[4 5-d]pyrimidin-7-one	O=C1NC=Nc2n(Cc3c4c(ccc3)cccc4)nnc12	-10.22	1.78	1.992	5.247	5.672	-0.7405	yes	medium	low	1.992	277.3
3564-0451	1	0.5084	3-hydroxy-N'-[(1E)-1H-pyrrol-2-ylmethylene]-2-naphthohydrazide	O=C(NN=Cc1[nH]ccc1)c1c(O)cc2c(c1)cccc2	-9.943	1.648	2.509	4.683	3.893	-0.5918	no	medium	high	2.509	279.3
8019-0080	1	0.3682	N-[(9-ethyl-9H-carbazol-3-yl)methyl]-N-(2H-1 2 3 4-tetraazol-5-yl)amine	N(Cc1cc2c(n(CC)c3c2cccc3)cc1)c1n[nH]nn1	-9.618	2.377	-0.2002	5.537	5.669	-0.8412	yes	medium	low	2.587	292.3
S636-0279	1	0.4049	7-(3 4 5-trifluorobenzyl)-2 5 6 7 8 9-hexahydro-3H-[1 2 4]triazolo[4 3-d][1 4]diazepin-3-one	Fc1c(F)cc(CN2CCN3C(=O)NN=C3CC2)cc1F	-9.327	2.374	0.7113	4.712	5.703	-0.3539	yes	low	low	1.293	298.3
F044-0015	1	0.649	2-(3-methylpiperidino)-2-oxo-N-[(4-oxo-3 4-dihydro-1-phthalazinyl)methyl]acetamide	O=C(NCC1=NNC(=O)c2c1cccc2)C(=O)N1CC(C)CCC1	-9.568	3.265	0.6533	4.444	4.223	-1.299	yes	low	low	0.6533	328.4
F044-0013	1	0.6109	2-oxo-N-[(4-oxo-3 4-dihydrophthalazin-1-yl)methyl]-2-piperidin-1-ylacetamide	O=C(NCC1=NNC(=O)c2c1cccc2)C(=O)N1CCCCC1	-9.554	3.425	0.3487	4.272	4.272	-1.272	yes	low	low	0.3487	314.3
Y043-5498	1	0.4123	N-(5-phenethyl-1H-1 2 4-triazol-3-yl)-1H-indole-2-carboxamide	O=C(Nc1nc(CCc2ccccc2)[nH]n1)c1[nH]c2c(c1)cccc2	-10.39	2.321	2.729	5.452	4.521	-0.3383	yes	low	high	2.729	331.4
8019-6433	1	0.4711	1-(1H-1 2 3 4-tetraazol-5-yl)-2 3 4 9-tetrahydro-1H-carbazole	c1(C2c3[nH]c4c(c3CCC2)cccc4)[nH]nnn1	-10.18	3.114	-0.6262	4.44	4.556	-1.192	yes	high	low	2.066	239.3
Y041-6180	1	0.2434	3-(1H-indol-3-yl)-N-[2-(5-methoxy-1H-indol-1-yl)ethyl]propanamide	O=C(NCCn1c2c(cc(OC)cc2)cc1)CCc1c2c([nH]c1)cccc2	-9.845	1.596	3.269	5.836	5.195	-0.6115	yes	medium	high	3.269	361.4
8019-6434F	1	0.4104	6-bromo-1-(1H-1 2 3 4-tetraazol-5-yl)-2 3 4 9-tetrahydro-1H-carbazole	Brc1cc2c([nH]c3C(c4[nH]nnn4)CCCc23)cc1	-9.747	2.885	-0.2209	5.127	4.712	-1.221	yes	high	low	2.837	318.2
S694-1477	1	0.395	4-(5-methyl-1-{1-[(1-methyl-1H-pyrazol-4-yl)methyl]tetrahydro-1H-pyrrol-3-yl}-1H-imidazol-2-yl)pyridine	C(N1CC(n2c(-c3ccncc3)ncc2C)CC1)c1cn(C)nc1	-9.327	3.223	0.903	4.881	5.571	-0.1622	yes	medium	low	2.011	322.4
F692-0295	0.9997	0.1346	7 8-dimethyl-4-oxo-N-(1-phenylethyl)-4H-[1 3]thiazino[3 2-a]benzimidazole-2-carboxamide	O=C(NC(C)c1ccccc1)C=1Sc2n(C(=O)C=1)c1c(n2)cc(C)c(C)c1	-9.964	1.086	3.572	5.902	5.233	-0.7886	no	high	high	3.572	377.5
F692-0246	1	0.2734	N~2~-benzyl-7 8-dimethyl-4-oxo-4H-[1 3]thiazino[3 2-a][1 3]benzimidazole-2-carboxamide	O=C(NCc1ccccc1)C=1Sc2n(C(=O)C=1)c1c(n2)cc(C)c(C)c1	-9.683	1.386	3.104	5.815	5.123	-0.8344	no	medium	high	3.104	363.4
4112-1233	1	0.7253	2 4-dihydroxybenzaldehyde (5-chloro-6-oxo-1 6-dihydropyridazin-4-yl)hydrazone	ClC=1C(=O)NN=CC=1NN=Cc1c(O)cc(O)cc1	-10.81	2.529	1.133	4.712	4.04	-0.9414	no	low	low	1.133	280.7
4112-1255	1	0.69	4-methylbenzaldehyde (5-chloro-6-oxo-1 6-dihydropyridazin-4-yl)hydrazone	ClC=1C(=O)NN=CC=1NN=Cc1ccc(C)cc1	-10.71	2.171	2.349	4.655	4.332	-1.136	no	medium	low	2.349	262.7
4300-0741	1	0.6472	4-fluorobenzaldehyde (5-chloro-6-oxo-1 6-dihydropyridazin-4-yl)hydrazone	ClC=1C(=O)NN=CC=1NN=Cc1ccc(F)cc1	-10.38	2.157	1.924	4.297	4.559	-1.043	no	medium	low	1.924	266.7
4112-1254	1	0.7081	3-methylbenzaldehyde (5-chloro-6-oxo-1 6-dihydropyridazin-4-yl)hydrazone	ClC=1C(=O)NN=CC=1NN=Cc1cc(C)ccc1	-10.02	2.171	2.349	4.69	4.161	-1.136	no	medium	low	2.349	262.7
4112-1270	1	0.6584	cyclohex-3-ene-1-carbaldehyde (5-chloro-6-oxo-1 6-dihydropyridazin-4-yl)hydrazone	ClC=1C(=O)NN=CC=1NN=CC1CC=CCC1	-9.782	2.683	1.578	4.494	4.485	-0.2913	no	low	low	1.578	252.7
G020-0246	1	0.4453	6-benzyl-2-ethyl-5-(methylthio)-2 6-dihydro-7H-pyrazolo[4 3-d]pyrimidin-7-one	S(C)C=1N(Cc2ccccc2)C(=O)c2nn(CC)cc2N=1	-10.05	1.978	2.354	4.937	5.425	-0.5452	no	medium	low	2.354	300.4
Y010-0475	1	0.5768	6-(3-methylbenzyl)[1 2 3]thiadiazolo[5 4-d]pyrimidin-7(6H)-one	O=C1N(Cc2cc(C)ccc2)C=Nc2snnc12	-9.932	2.992	1.94	4.687	5.109	-0.8323	no	medium	low	1.94	258.3
C200-7343	1	0.5644	3-(3-methoxybenzyl)-3 6-dihydro-7H-[1 2 3]triazolo[4 5-d]pyrimidin-7-one	O(C)c1cc(Cn2nnc3C(=O)NC=Nc23)ccc1	-10.19	3.139	0.7364	4.574	5.029	-1.224	no	low	low	0.7364	257.2
C200-9369	1	0.4595	3-(3 5-difluorobenzyl)-3 6-dihydro-7H-[1 2 3]triazolo[4 5-d]pyrimidin-7-one	Fc1cc(F)cc(Cn2nnc3C(=O)NC=Nc23)c1	-9.966	2.149	1.094	4.829	5.498	-1.063	no	low	low	1.094	263.2
C200-5586	1	0.5676	3-benzyl-3 6-dihydro-7H-[1 2 3]triazolo[4 5-d]pyrimidin-7-one	O=C1NC=Nc2n(Cc3ccccc3)nnc12	-9.776	3.195	0.8278	4.326	5.082	-0.9622	no	low	low	0.8278	227.2
8016-1259	1	0.5351	3-(2-chlorobenzyl)-3 6-dihydro-7H-[1 2 3]triazolo[4 5-d]pyrimidin-7-one	Clc1c(Cn2nnc3C(=O)NC=Nc23)cccc1	-9.704	2.66	1.453	4.734	5.114	-1.036	no	low	low	1.453	261.7
D035-0123	1	0.5005	3-benzyl-7-(ethylsulfanyl)-4H-[1 3 4]thiadiazolo[2 3-c][1 2 4]triazin-4-one	S(CC)C=1SC=2N(C(=O)C(Cc3ccccc3)=NN=2)N=1	-9.688	1.944	2.185	4.734	5.239	-0.7993	no	medium	low	2.185	304.4
M876-1308	1	0.2793	2-(5-{[5-(3 5-difluorophenyl)-1 3 4-oxadiazol-2-yl]methyl}-1 2 4-oxadiazol-3-yl)pyridine	Fc1cc(F)cc(-c2oc(Cc3onc(-c4ncccc4)n3)nn2)c1	-9.605	1.218	2.95	5.748	5.209	-0.8305	no	medium	high	2.95	341.3
C614-5994	1	0.7194	4-(3 4 5-trimethoxyphenyl)-1H-pyrazol-3-amine	O(C)c1c(OC)cc(-c2c(N)n[nH]c2)cc1OC	-10.67	3.556	0.4759	4.289	3.684	-0.4243	no	low	low	1.239	249.3
8018-4704	1	0.672	4-(3 4-diethoxyphenyl)-1H-pyrazol-3-amine	O(CC)c1c(OCC)ccc(-c2c(N)n[nH]c2)c1	-10.23	2.823	1.203	4.35	4.018	-0.6146	no	medium	low	2.097	247.3
8016-5424	1	0.3642	3-(4-fluorophenyl)-1H-pyrazole-4-carbaldehyde 4-(1H-1 3-benzimidazol-2-yl)hydrazone	Fc1ccc(-c2c(C=NNc3[nH]c4c(n3)cccc4)c[nH]n2)cc1	-9.917	1.449	2.504	5.559	4.778	-1.062	yes	medium	high	2.504	320.3
1601-0121	1	0.7853	N-(2-{2-[(E)-1-(2-furyl)methylidene]hydrazino}-2-oxoethyl)-4-methyl-1-benzenesulfonamide	S(=O)(=O)(NCC(=O)NN=Cc1occc1)c1ccc(C)cc1	-9.693	3.073	1.469	4.357	4.162	-0.8412	no	low	low	1.469	321.4
Y043-3266	1	0.6542	N-(1H-1 2 4-triazol-3-yl)-2-[2-(trifluoromethoxy)phenyl]acetamide	FC(F)(F)Oc1c(CC(=O)Nc2n[nH]cn2)cccc1	-9.968	2.746	1.875	4.062	4.121	-0.1837	no	low	low	1.875	286.2
8017-6114	1	0.6433	2-(difluoromethoxy)-5-(2H-1 2 3 4-tetraazol-5-yl)phenyl methyl ether	FC(F)Oc1c(OC)cc(-c2n[nH]nn2)cc1	-10.45	3.876	1.349	4.129	4.202	-0.3743	no	medium	low	1.349	242.2
8018-5119	1	0.6743	N-(2-methoxybenzyl)-N-(2H-1 2 3 4-tetraazol-5-yl)amine	O(C)c1c(CNc2n[nH]nn2)cccc1	-10.72	4.251	-1.844	3.91	4.251	-0.3347	no	low	low	0.7247	205.2
8008-8036	1	0.4459	N-{2-[(4-chlorobenzyl)oxy]benzyl}-N-(2H-1 2 3 4-tetraazol-5-yl)amine	Clc1ccc(COc2c(CNc3n[nH]nn3)cccc2)cc1	-9.764	2.284	-0.0558	5.157	4.965	-0.2417	no	medium	high	2.687	315.8
P932-0007	1	0.5727	3-furyl[3-(hydroxymethyl)-1-methyl-1 4 6 7-tetrahydro-5H-pyrazolo[4 3-c]pyridin-5-yl]methanone	O=C(N1Cc2c(CO)nn(C)c2CC1)c1cocc1	-9.786	3.891	0.3613	4.643	4.679	-0.5547	no	low	low	0.3613	261.3
K007-0554	1	0.568	(1Z)-1-(2 3 4-trihydroxyphenyl)ethanone (2 3-dimethylphenyl)hydrazone	Oc1c(O)c(C(=NNc2c(C)c(C)ccc2)C)ccc1O	-9.977	2.428	2.432	5.131	4.524	-0.3684	no	medium	high	2.432	286.3
8009-0495	1	0.3136	(Z)-2-ammonio-4-oxo-4-(2 3 4 5-tetrafluoro-6-hydroxyphenyl)-2-butenoate	Fc1c(F)c(F)c(C(=O)C=C(N)C(=O)O)c(O)c1F	-9.872	1.493	-1.482	4.53	3.787	-0.9993	no	medium	low	2.045	279.1
8019-7868	1	0.7455	2-(2H-1 2 3 4-tetraazol-5-ylmethyl)benzoic acid	O=C(O)c1c(Cc2n[nH]nn2)cccc1	-9.916	3.945	-3.576	4.164	3.289	-1.036	no	low	low	0.8746	204.2
8008-0959	1	0.717	[formyl(methyl)amino]methyl(phenethyl)phosphinic acid	P(=O)(O)(CN(C=O)C)CCc1ccccc1	-9.29	4.516	0.05613	4.118	4.501	-0.3647	no	low	low	1.124	241.2
8018-6424	1	0.2435	4-(2H-1 2 3 4-tetraazol-5-yl)-1 2 5-oxadiazole-3-carbohydrazonamide	N(N)=C(N)c1c(-c2n[nH]nn2)non1	-9.849	4.826	-2.754	3.771	2.767	-1.181	yes	low	low	-1.188	195.1
8017-4447	1	0.4257	4-{(E)-2-[3-(2-thienyl)-1H-pyrazol-4-yl]-1-ethenyl}-6-(trifluoromethyl)-2(3H)-pyrimidinone	FC(F)(F)C1=NC(=O)NC(C=Cc2c(-c3sccc3)n[nH]c2)=C1	-10.15	2.008	2.594	4.968	4.532	-1.103	no	high	high	2.594	338.3
8015-8165	1	0.4354	3-(2H-1 2 3 4-tetraazol-5-ylamino)-2-cyclohexen-1-one	O=C1C=C(Nc2n[nH]nn2)CCC1	-10.2	4.171	-0.1917	3.979	3.75	-0.9071	yes	low	low	-0.1917	179.2
