# Supplementary material for: Inhibition of BMPR2 ubiquitination-dependent degradation suppresses bladder cancer cell growth via downregulating Smurf1 expression with 8003-1841
Source: Research Square preprint supplement (doi:10.21203/rs.3.rs-5313133/v1), 2024-10-28
Supplement: Supplementary file 3 [file a542c71b576d6a50d51f278b.docx]

**Supplementary material**

Inhibition of BMPR2 ubiquitination-dependent degradation suppresses bladder cancer cell growth via downregulating Smurf1 expression with 8003-1841

Qiongli Su1#, Yuqing Zhang2#, Wu Ling1, Qiuhong Tan1, Long Wei1, Di Xiao3*, Li Huang1*

1Department of Pharmacy，The Affifiliated Zhuzhou Hospital Xiangya Medical College CSU, Zhuzhou, Hunan, China;

2Department of cardiovascular, Xiangtan Central Hospital (The Affiliated Hospital of Hunan University), Xian tan, 411000, Hunan, China;

3TCM and Ethnomedicine Innovation & Development International Laboratory, School of Pharmacy, Hunan University of Chinese Medicine, Changsha 410208, PR China.

#These authors contributed equally to this work.

*****Correspondence: Di Xiao, PhD, Tel/Fax: 86-152-0080-5870. Email: dixiao@hunnu.edu.cn (D. X.). Li Huang, MD, Tel/Fax: 86-17707335257. Email: [azahuangli@aliyun.com(L.H.)](mailto:azahuangli@aliyun.com(L.H.))

**Contents**

Supplementary Figures……………………………………………………………3-6

**Figure S1**


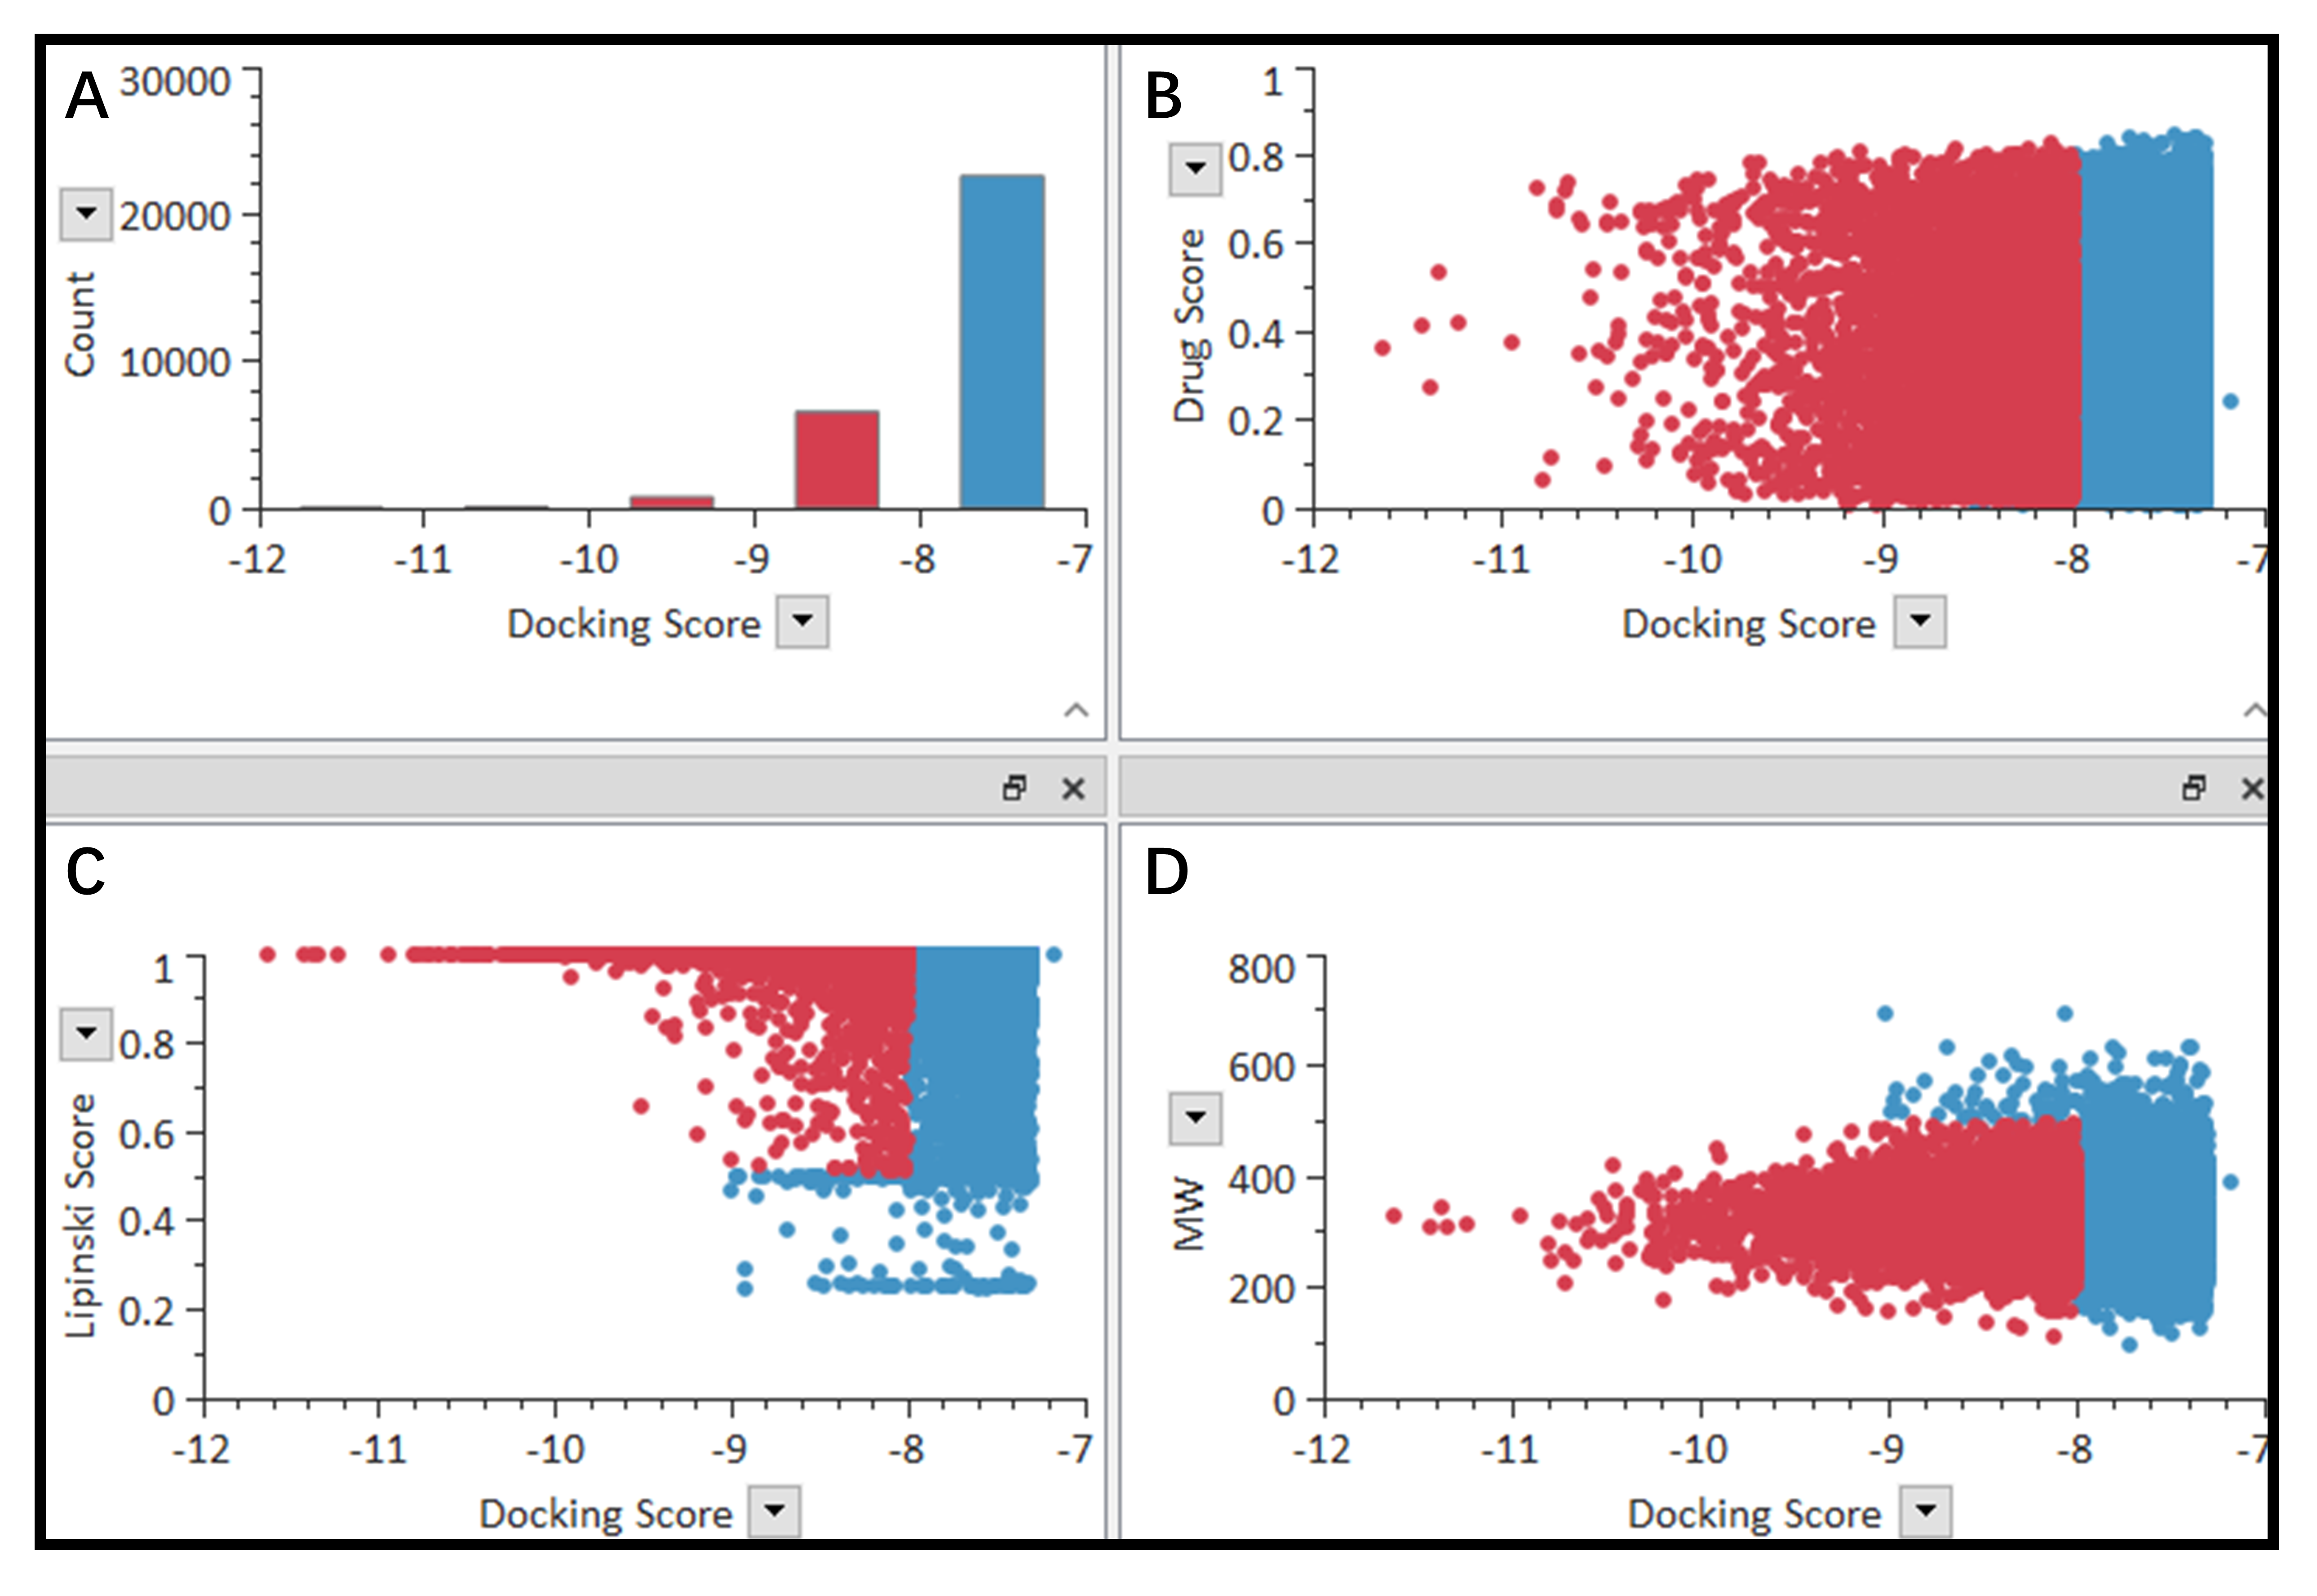


**Figure S1. Attributes of 30,000 small molecule compounds with high affinity to Smurf1 from the ChemDiv database.** (A) The number of compounds in different affinity score ranges (B) The correlation between affinity score and drug-likeness score (C) The correlation between affinity score and Lipinski's Rule of Five score (D) The correlation between affinity score and molecular weight. Among these, 7308 compounds were highlighted in red, indicating their favorable drug-likeness, affinity, Lipinski's Rule compliance, and molecular weight properties.

**Figure S2**


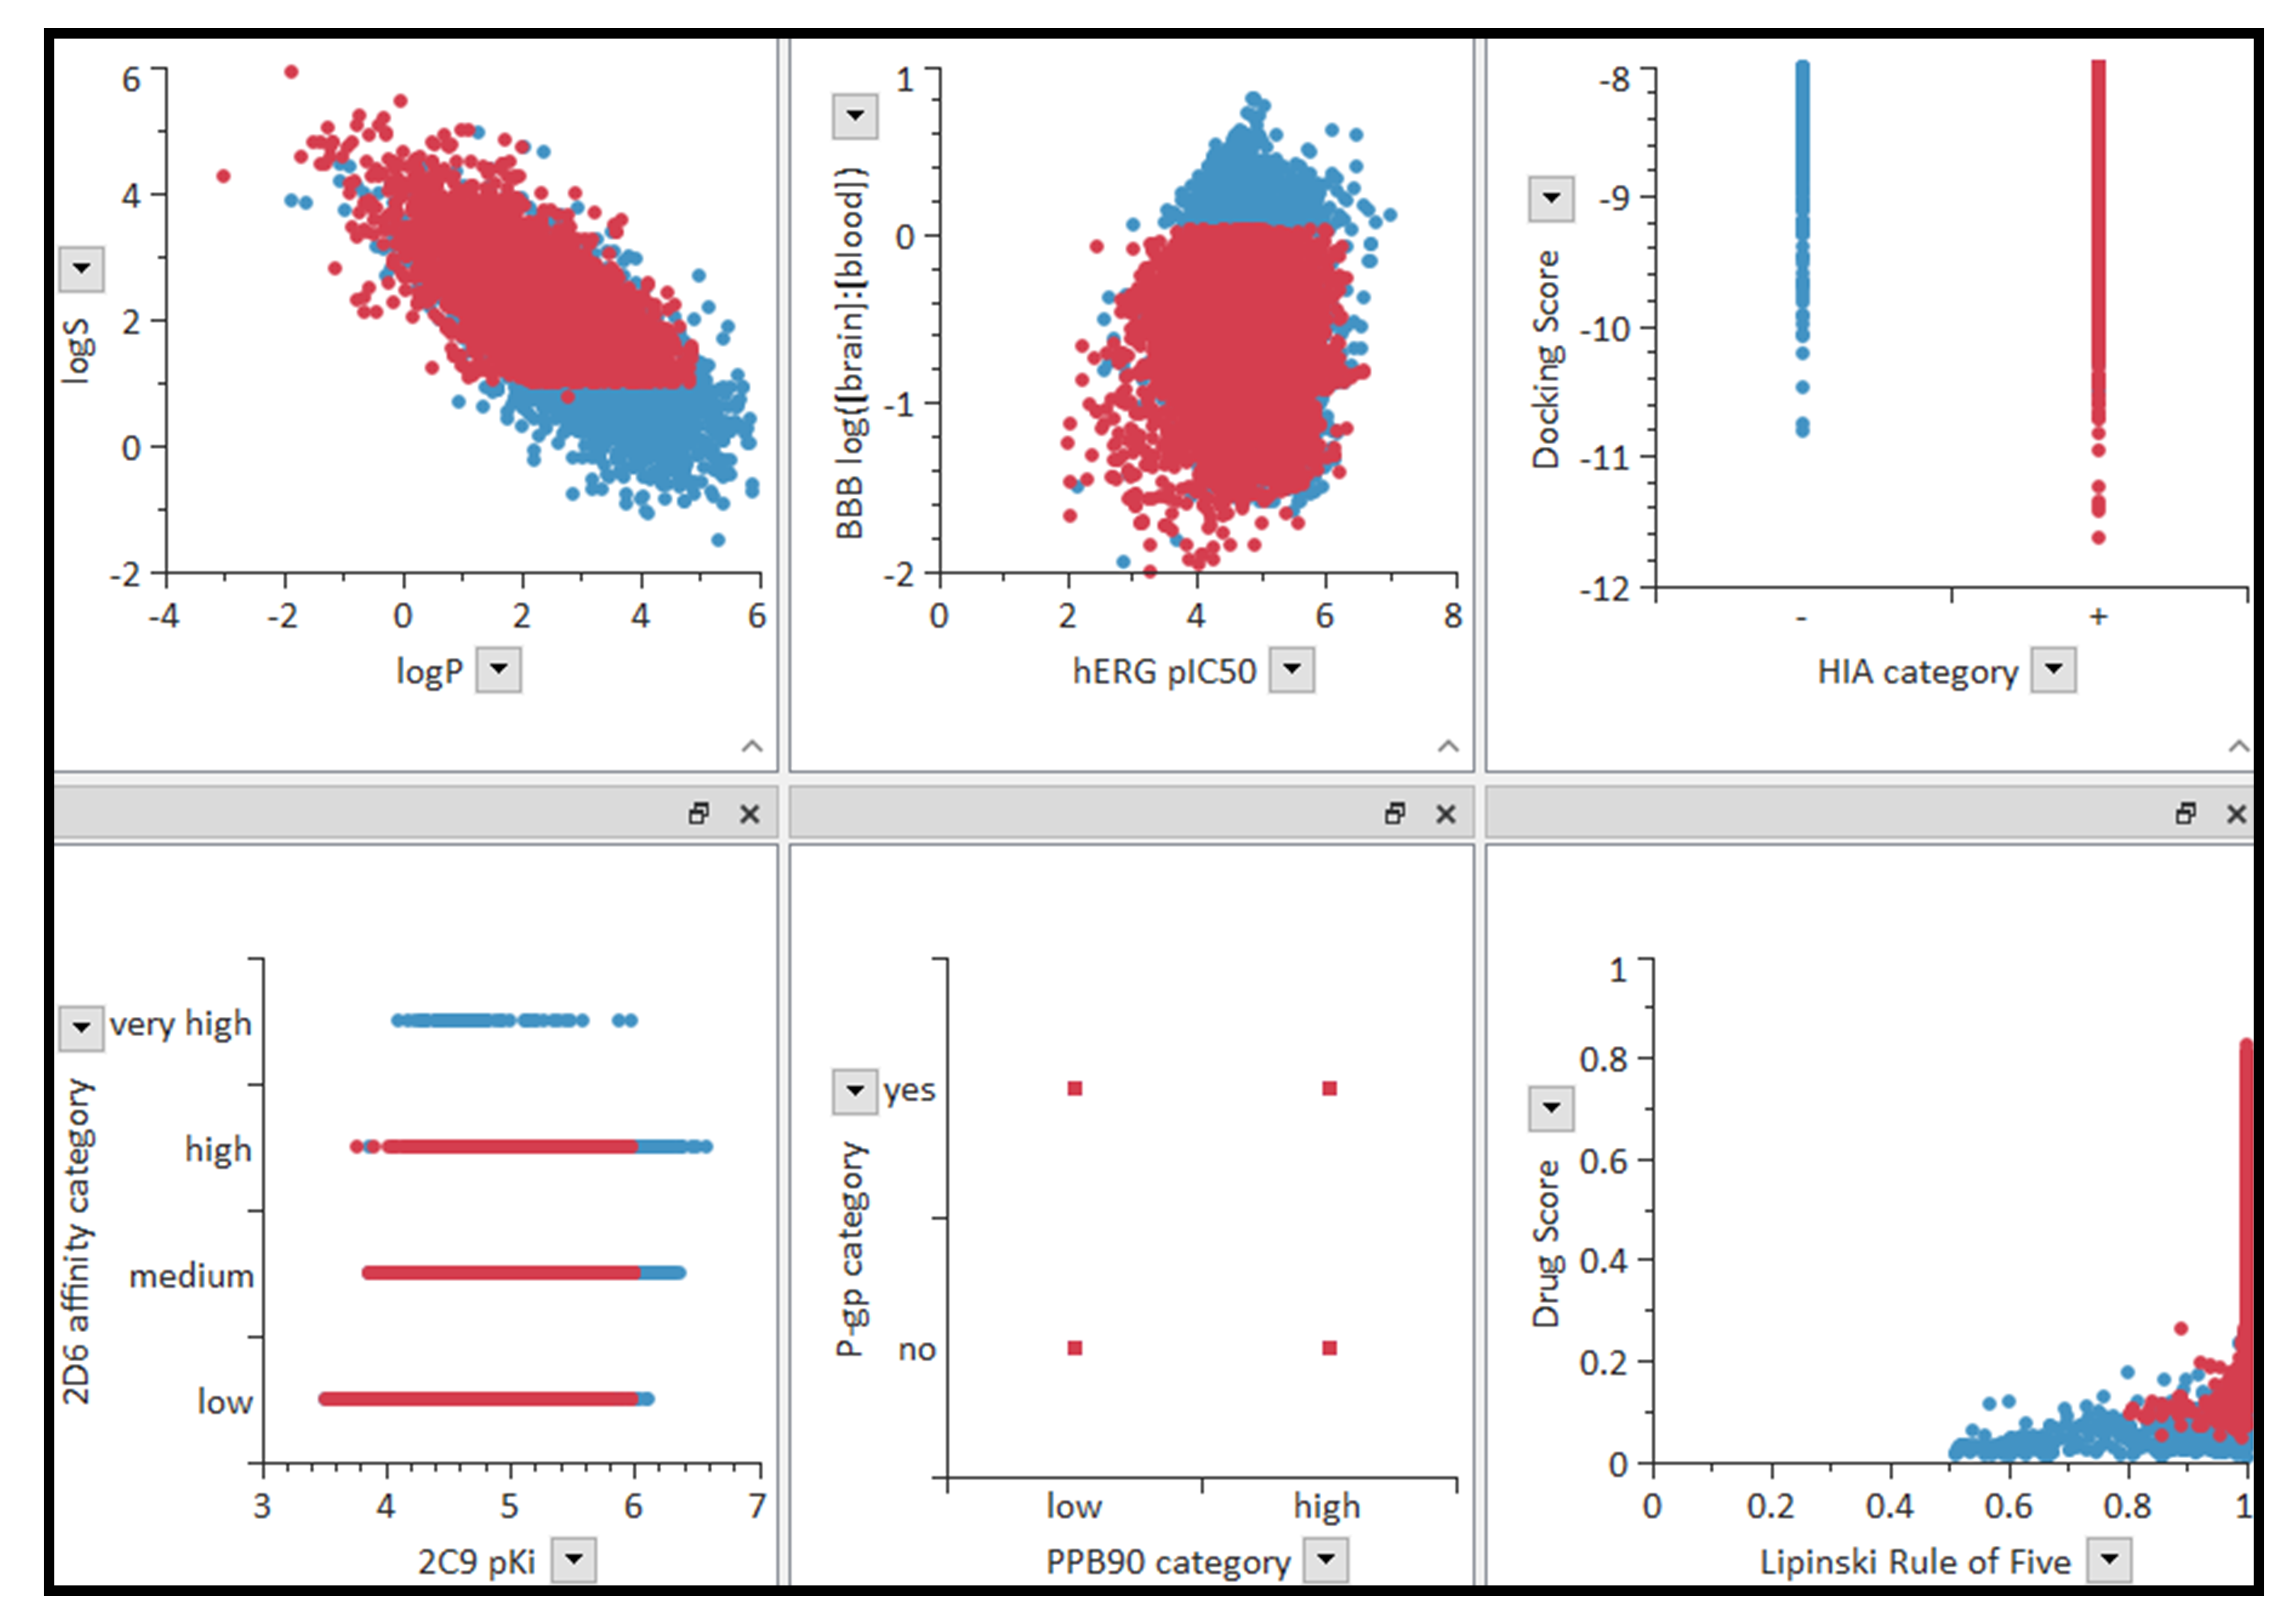


**Figure S2. Drug-likeness properties of 7308 small molecule compounds.** Among these, 4846 compounds were further identified in red as having superior drug-likeness properties.

**Figure S3**


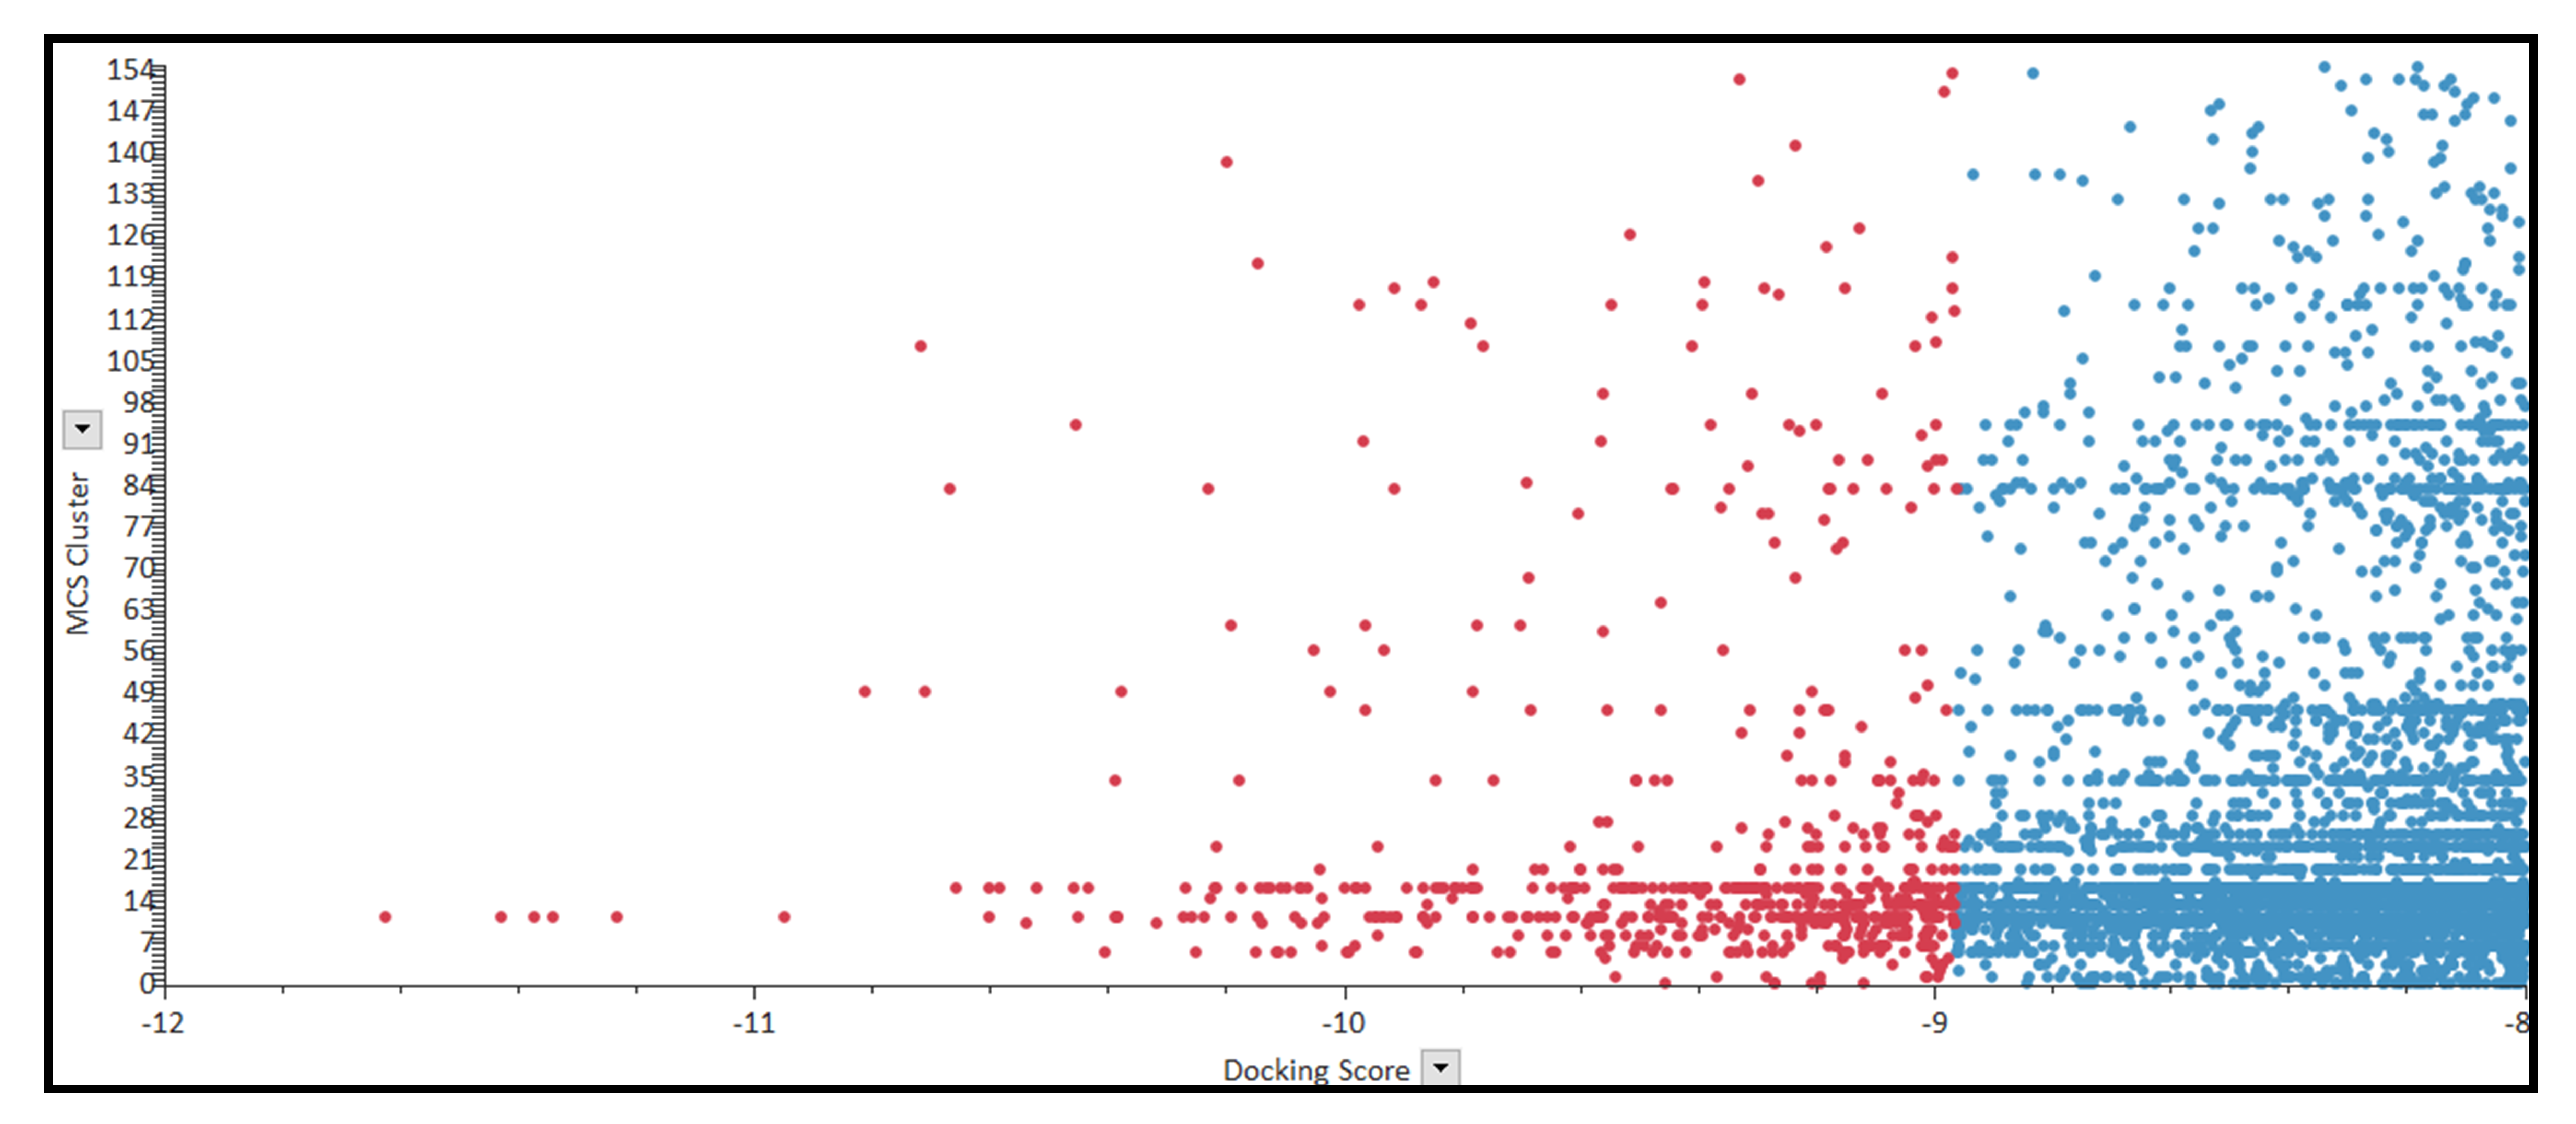


**Figure S3. The correlation between structural diversity and affinity score of 4846 compounds.** Among these compounds, under the threshold set at 0.4 for common scaffold classification, the 4846 compounds can be divided into 154 groups. Within each group, 643 compounds with good affinity (less than -9 or close to -9) are highlighted in red.

**Figure S4**


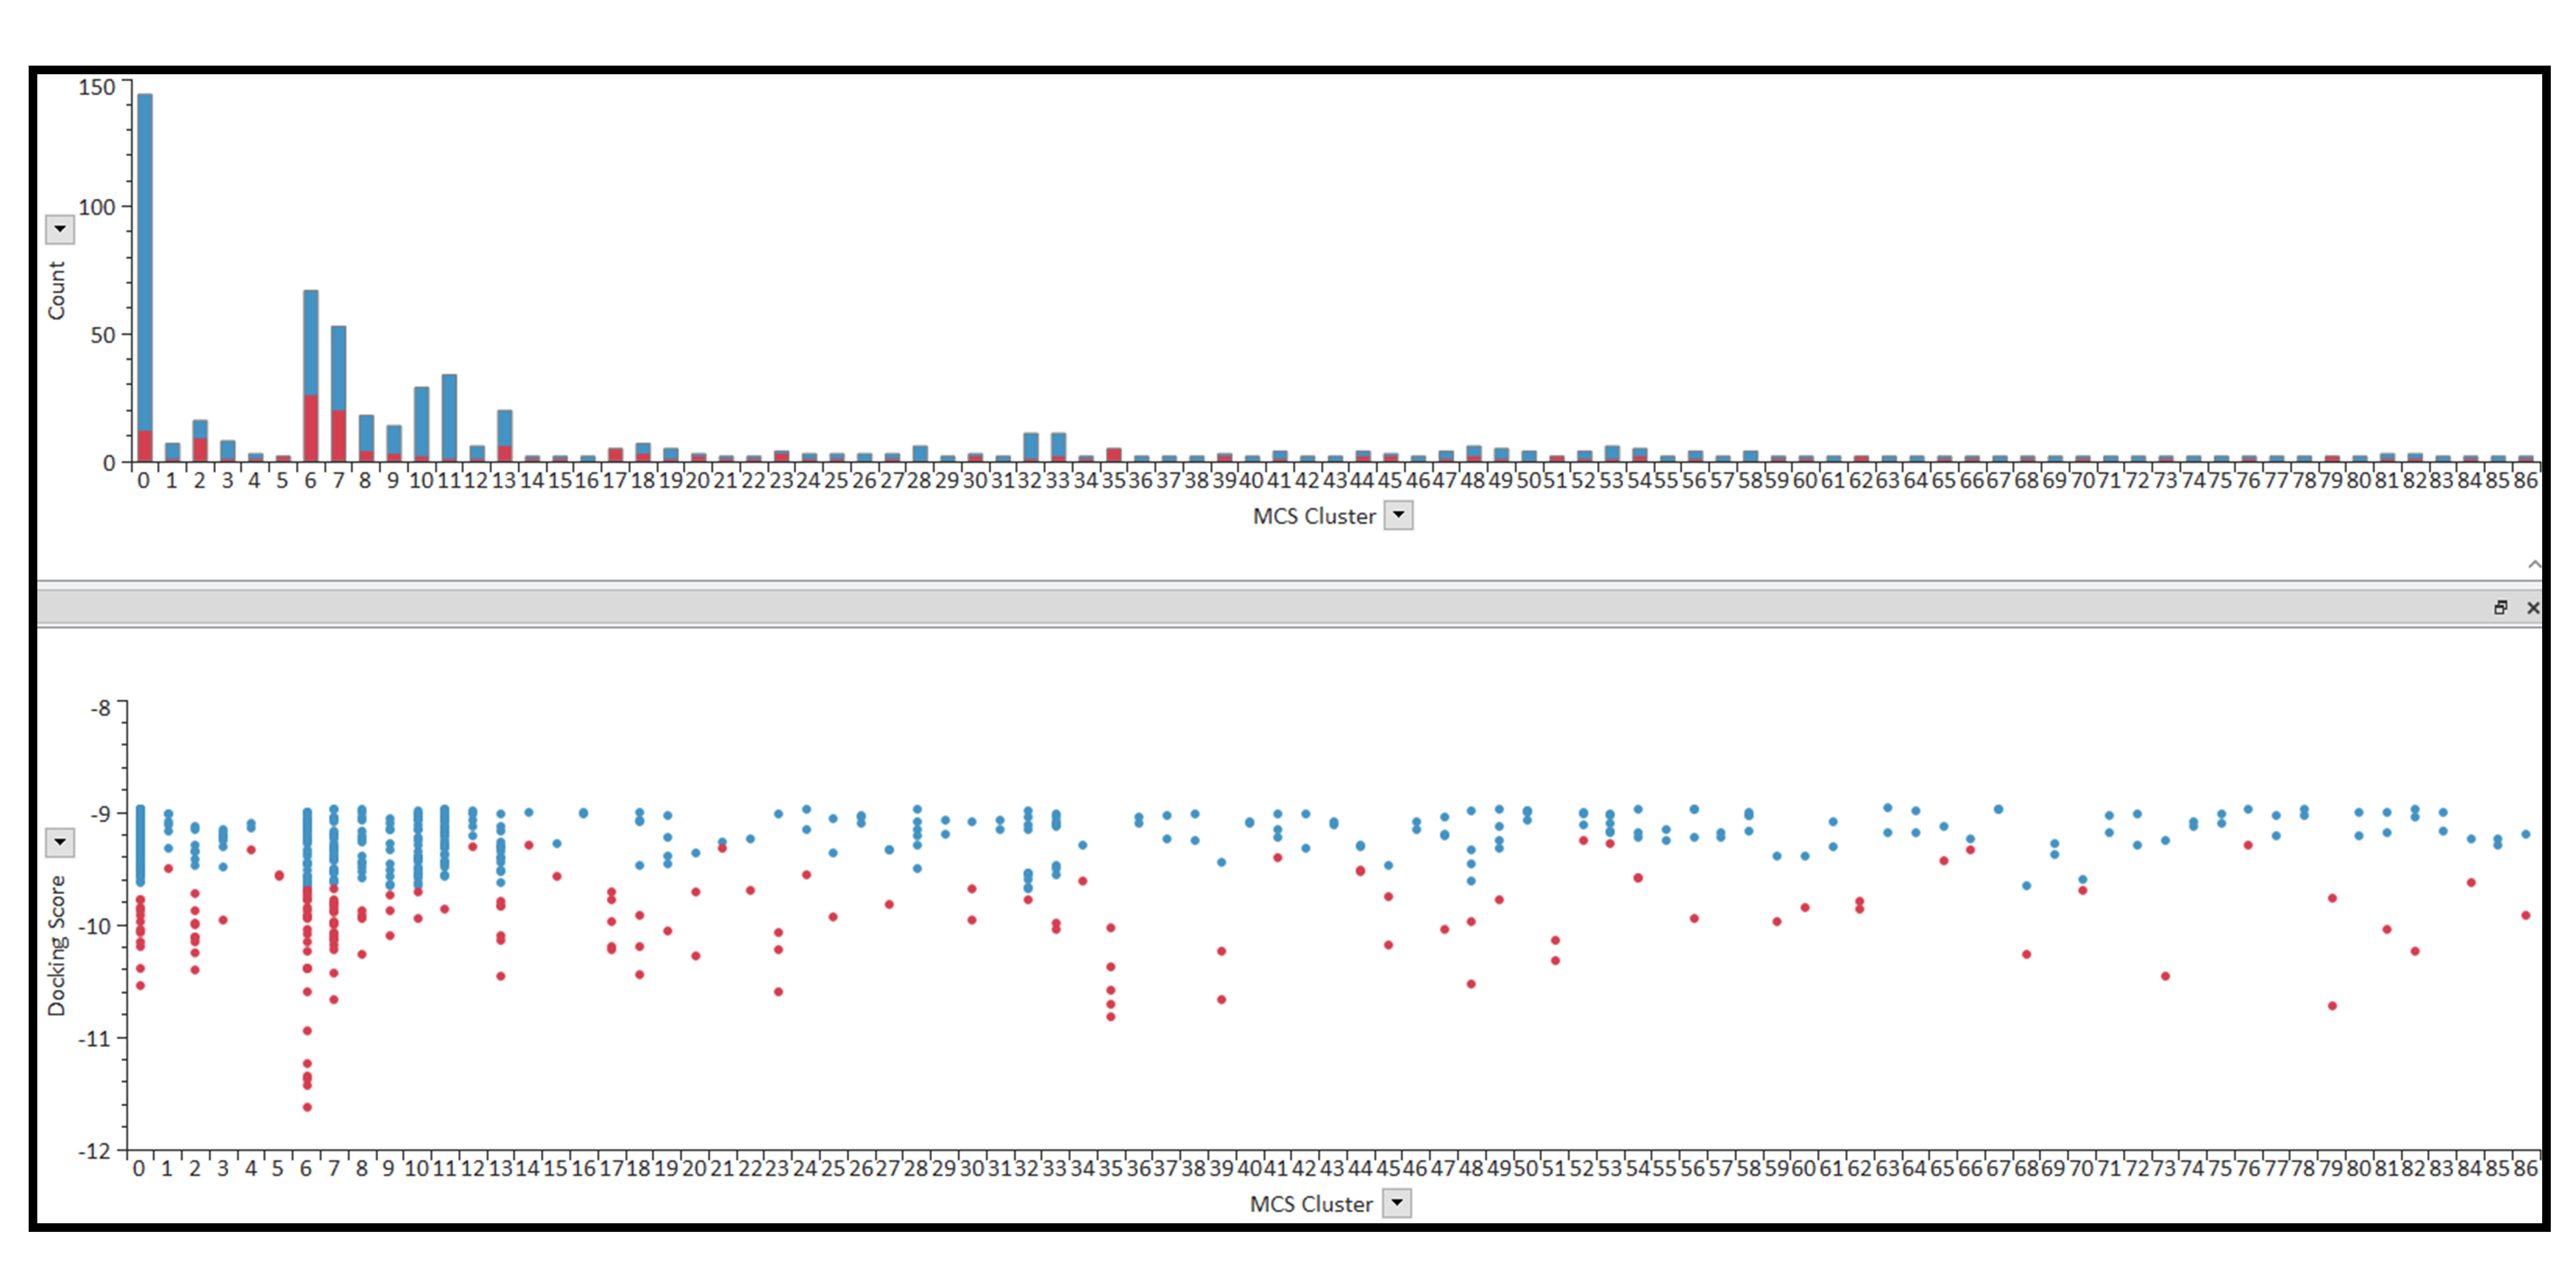


**Figure S4. The correlation between structural diversity and affinity score of 643 compounds.** Under the threshold set at 0.7 for common scaffold classification, the 643 compounds can be divided into 86 groups. Within each group, 155 compounds with good affinity are highlighted in red.
