# Supplementary material for: Inhibition of BMPR2 ubiquitination-dependent degradation suppresses bladder cancer cell growth via downregulating Smurf1 expression with 8003-1841
Source: Research Square preprint supplement (doi:10.21203/rs.3.rs-5313133/v1), 2024-10-28
Supplement: Supplementary file 4 [file ee26b79ca71c2904ce8209eb.xlsx]

## Sheet: Summary
Rank(100 μM)	Index	ID	100 μM	10 μM	1 μM	0.1 μM	0.01 μM
1	4	8003-1841	0.955169	0.545674	0.181743	0.0666035	0.0236901
2	8	8561-08413	0.954029	0.161272	0.119483	0.0844558	0.0512311
3	7	8525-0613	0.945989	0.105035	0.0593178	0.0500451	-0.0268478
4	2	8002-9216	0.938718	0.104634	0.100229	0.00423588	0.0407723
5	5	8005-6484	0.933959	0.454765	0.0875519	0.101276	-0.00938056
6	18	D351-0053	0.930863	0.215245	0.149088	0.0166047	0.0355352
7	3	8003-0828	0.866431	0.328397	0.0684981	0.0350885	0.0676663
8	6	8525-0606	0.753341	0.123595	0.1144	0.0971173	-0.00398943
9	1	2181-0037	0.648244	0.00682363	-0.00978104	-0.0212872	-0.0321003
10	20	D489-0156	0.613356	0.000693145	0.095808	0.276565	-0.0129695
11	15	D205-0357	0.539975	0.120484	0.0994586	0.0987038	0.0452547
12	16	D205-0361	0.486695	0.186209	0.143373	0.11748	0.0750753
13	17	D205-0362	0.456659	0.0598877	0.0976872	0.0780019	0.071933
14	13	D205-0344	0.383971	0.114492	0.103448	0.0868896	0.00631532
15	12	D205-0343	0.376362	0.172439	0.0981185	0.0533721	0.0796654
16	10	D205-0319	0.304722	0.107607	0.114061	0.119175	-0.0357663
17	11	D205-0320	0.258589	0.0851644	0.0764308	0.0567763	0.0503839
18	14	D205-0356	0.258158	0.0725492	0.082438	0.132776	0.0505996
19	19	D458-0731	0.169651	-0.00172516	0.0726724	0.0960391	-0.00777862
20	9	D205-0317	0.153601	0.074644	0.0504455	0.0287578	-0.00386621
